# Supplementary material for: Identifying contamination with advanced visualization and analysis practices: metagenomic approaches for eukaryotic genome assemblies
Source: PeerJ. 2016 Mar 29;4:e1839. doi: 10.7717/peerj.1839 (PMC4824900; doi:10.7717/peerj.1839)
Supplement: Table S1 [file peerj-04-1839-s003.xlsx]

## Sheet: Supplementary Table 01
			Taxonnomy (RAST best hit)	Length (Mbp)	Nb of contigs	N50	GC-content (%)	Completion (%)	Redundancy (%)
		Boothby et al., 2015
		Hypsibius dujardini raw assembly	Composite *	252.536	22496	15907	48.2061	100 **	1204.3 **
		Curated tardigrade genome	Hypsibius dujardini *	182.159	14961	17214	45.9279	48.2 **	169.1 **
		Bacterial draft genome 01	Thermosinus carboxydivorans Nor1	3.78332	5	1189196	49.7472	89.2	0
		Bacterial draft genome 02	Chitinophaga pinensis DSM 2588	4.75713	4	1255804	42.7261	99.3	1.4
		Bacterial draft genome 03	Chitinophaga pinensis DSM 2588	4.47553	29	431226	42.6173	90.7	1.4
		Koutsovoulos et al., 2015
		Hypsibius dujardini raw assembly	Composite *	160.688	24841	12187	48.42	100 **	793.5 **
		Curated tardigrade genome	Hypsibius dujardini *	115.636	15809	12240	45.0215	52.5 **	54 **
		Bacterial draft genome K-01	Pedobacter saltans DSM 12145	6.8186	268	39320	47.4703	84.9	2.9
		Bacterial draft genome K-02	Leptothrix cholodni SP-6	6.02493	847	11268	69.4206	93.5	4.3
		Bacterial draft genome K-03	Dyadobacter fermentans DSM 18053	4.09187	380	14542	44.2097	51.1	14.4
		Bacterial draft genome K-04	Methylibium petroleiphilum PM1	3.44701	835	6092	69.3134	90.7	4.3
		Bacterial draft genome K-05	Fibrisoma limi	2.40643	582	5339	41.8457	28.1	5
		Bacterial draft genome K-06	Spirosoma linguale DSM 74	2.07729	455	6292	41.5534	20.9	1.4
		Bacterial draft genome K-07	Pedobacter saltans DSM 12145	5.91394	19	483903	48.9188	97.8	0.7
		Bacterial draft genome K-08	Methylotenera mobilis JLW8	3.12629	11	407930	50.3869	77	2.9
