# Supplementary material for: Identifying contamination with advanced visualization and analysis practices: metagenomic approaches for eukaryotic genome assemblies
Source: PeerJ. 2016 Mar 29;4:e1839. doi: 10.7717/peerj.1839 (PMC4824900; doi:10.7717/peerj.1839)
Supplement: Table S2 [file peerj-04-1839-s004.xlsx]

## Sheet: RAW RAST Output
Bacterial draft genome #B-02	Type	Contig	Start	Stop	Length (bp)	Function	Subsystems	Begin	End	Region
fig|6666666.161614.peg.1	CDS	gi_957788172_gb_LMYF01000008_1_Hypsibius_dujardini_scaffold8	1186	11	1176	COG2152 predicted glycoside hydrolase	- none -	11	1186
fig|6666666.161614.peg.2	CDS	gi_957788172_gb_LMYF01000008_1_Hypsibius_dujardini_scaffold8	1303	2973	1671	hypothetical protein	- none -	1303	2973
fig|6666666.161614.peg.3	CDS	gi_957788172_gb_LMYF01000008_1_Hypsibius_dujardini_scaffold8	2999	4588	1590	hypothetical protein	- none -	2999	4588
fig|6666666.161614.peg.4	CDS	gi_957788172_gb_LMYF01000008_1_Hypsibius_dujardini_scaffold8	5212	4643	570	hypothetical protein	- none -	4643	5212
fig|6666666.161614.peg.5	CDS	gi_957788172_gb_LMYF01000008_1_Hypsibius_dujardini_scaffold8	5402	7846	2445	TonB-dependent receptor	Ton and Tol transport systems	5402	7846
fig|6666666.161614.peg.6	CDS	gi_957788172_gb_LMYF01000008_1_Hypsibius_dujardini_scaffold8	7916	8389	474	hypothetical protein	- none -	7916	8389
fig|6666666.161614.peg.7	CDS	gi_957788172_gb_LMYF01000008_1_Hypsibius_dujardini_scaffold8	8695	8384	312	Phage shock protein E	- none -	8384	8695
fig|6666666.161614.peg.8	CDS	gi_957788172_gb_LMYF01000008_1_Hypsibius_dujardini_scaffold8	9132	8749	384	hypothetical protein	- none -	8749	9132
fig|6666666.161614.peg.9	CDS	gi_957788172_gb_LMYF01000008_1_Hypsibius_dujardini_scaffold8	11079	9286	1794	Lipid A export ATP-binding/permease protein MsbA	- none -	9286	11079
fig|6666666.161614.peg.10	CDS	gi_957788172_gb_LMYF01000008_1_Hypsibius_dujardini_scaffold8	11180	12232	1053	Glycosyltransferase	- none -	11180	12232
fig|6666666.161614.peg.11	CDS	gi_957788172_gb_LMYF01000008_1_Hypsibius_dujardini_scaffold8	12250	12966	717	Conserved domain protein	- none -	12250	12966
fig|6666666.161614.peg.12	CDS	gi_957788172_gb_LMYF01000008_1_Hypsibius_dujardini_scaffold8	12970	13905	936	hypothetical protein	- none -	12970	13905
fig|6666666.161614.peg.13	CDS	gi_957788172_gb_LMYF01000008_1_Hypsibius_dujardini_scaffold8	15467	13917	1551	MG(2+) CHELATASE FAMILY PROTEIN / ComM-related protein	- none -	13917	15467
fig|6666666.161614.peg.14	CDS	gi_957788172_gb_LMYF01000008_1_Hypsibius_dujardini_scaffold8	16328	15498	831	hypothetical protein	- none -	15498	16328
fig|6666666.161614.peg.15	CDS	gi_957788172_gb_LMYF01000008_1_Hypsibius_dujardini_scaffold8	17976	16408	1569	Membrane alanine aminopeptidase N (EC 3.4.11.2)	Aminopeptidases (EC 3.4.11.-)	16408	17976
fig|6666666.161614.peg.16	CDS	gi_957788172_gb_LMYF01000008_1_Hypsibius_dujardini_scaffold8	19372	18056	1317	MutS-related protein, family 1	DNA repair, bacterial MutL-MutS system	18056	19372
fig|6666666.161614.peg.17	CDS	gi_957788172_gb_LMYF01000008_1_Hypsibius_dujardini_scaffold8	20674	19394	1281	Dihydroorotase (EC 3.5.2.3)	De Novo Pyrimidine Synthesis	19394	20674
fig|6666666.161614.peg.18	CDS	gi_957788172_gb_LMYF01000008_1_Hypsibius_dujardini_scaffold8	20769	22457	1689	hypothetical protein	- none -	20769	22457
fig|6666666.161614.peg.19	CDS	gi_957788172_gb_LMYF01000008_1_Hypsibius_dujardini_scaffold8	22978	22463	516	hypothetical protein	- none -	22463	22978
fig|6666666.161614.peg.20	CDS	gi_957788172_gb_LMYF01000008_1_Hypsibius_dujardini_scaffold8	23749	23009	741	PorT protein	- none -	23009	23749
fig|6666666.161614.peg.21	CDS	gi_957788172_gb_LMYF01000008_1_Hypsibius_dujardini_scaffold8	24402	23719	684	Ubiquinone/menaquinone biosynthesis methyltransferase UbiE (EC 2.1.1.-) @ 2-heptaprenyl-1,4-naphthoquinone methyltransferase (EC 2.1.1.163)	Menaquinone Biosynthesis via Futalosine, Menaquinone and Phylloquinone Biosynthesis, Menaquinone and Phylloquinone Biosynthesis	23719	24402
fig|6666666.161614.peg.22	CDS	gi_957788172_gb_LMYF01000008_1_Hypsibius_dujardini_scaffold8	24572	25216	645	GTP-binding protein EngB	- none -	24572	25216
fig|6666666.161614.peg.23	CDS	gi_957788172_gb_LMYF01000008_1_Hypsibius_dujardini_scaffold8	25289	25492	204	hypothetical protein	- none -	25289	25492
fig|6666666.161614.peg.24	CDS	gi_957788172_gb_LMYF01000008_1_Hypsibius_dujardini_scaffold8	25553	25852	300	hypothetical protein	- none -	25553	25852
fig|6666666.161614.peg.25	CDS	gi_957788172_gb_LMYF01000008_1_Hypsibius_dujardini_scaffold8	26384	25911	474	DUF458 domain-containing protein	- none -	25911	26384
fig|6666666.161614.peg.26	CDS	gi_957788172_gb_LMYF01000008_1_Hypsibius_dujardini_scaffold8	28075	26477	1599	hypothetical protein	- none -	26477	28075
fig|6666666.161614.peg.27	CDS	gi_957788172_gb_LMYF01000008_1_Hypsibius_dujardini_scaffold8	28620	28147	474	hypothetical protein	- none -	28147	28620
fig|6666666.161614.peg.28	CDS	gi_957788172_gb_LMYF01000008_1_Hypsibius_dujardini_scaffold8	29183	28818	366	hypothetical protein	- none -	28818	29183
fig|6666666.161614.peg.29	CDS	gi_957788172_gb_LMYF01000008_1_Hypsibius_dujardini_scaffold8	30112	29606	507	Probable transcriptional regulator	- none -	29606	30112
fig|6666666.161614.peg.30	CDS	gi_957788172_gb_LMYF01000008_1_Hypsibius_dujardini_scaffold8	30236	32086	1851	Pyrrolo-quinoline quinone	- none -	30236	32086
fig|6666666.161614.peg.31	CDS	gi_957788172_gb_LMYF01000008_1_Hypsibius_dujardini_scaffold8	32319	32083	237	hypothetical protein	- none -	32083	32319
fig|6666666.161614.peg.32	CDS	gi_957788172_gb_LMYF01000008_1_Hypsibius_dujardini_scaffold8	34186	32528	1659	Dihydrolipoamide acetyltransferase component of pyruvate dehydrogenase complex (EC 2.3.1.12)	5-FCL-like protein, Dehydrogenase complexes, Pyruvate metabolism II: acetyl-CoA, acetogenesis from pyruvate	32528	34186
fig|6666666.161614.peg.33	CDS	gi_957788172_gb_LMYF01000008_1_Hypsibius_dujardini_scaffold8	34326	36422	2097	hypothetical protein	- none -	34326	36422
fig|6666666.161614.peg.34	CDS	gi_957788172_gb_LMYF01000008_1_Hypsibius_dujardini_scaffold8	38236	36419	1818	DNA polymerase III subunits gamma and tau (EC 2.7.7.7)	DNA processing cluster	36419	38236
fig|6666666.161614.peg.35	CDS	gi_957788172_gb_LMYF01000008_1_Hypsibius_dujardini_scaffold8	39502	38342	1161	hypothetical protein	- none -	38342	39502
fig|6666666.161614.peg.36	CDS	gi_957788172_gb_LMYF01000008_1_Hypsibius_dujardini_scaffold8	40788	39529	1260	RNA polymerase sigma-70 factor, ECF subfamily	- none -	39529	40788
fig|6666666.161614.peg.37	CDS	gi_957788172_gb_LMYF01000008_1_Hypsibius_dujardini_scaffold8	41134	40790	345	hypothetical protein	- none -	40790	41134
fig|6666666.161614.peg.38	CDS	gi_957788172_gb_LMYF01000008_1_Hypsibius_dujardini_scaffold8	43132	41297	1836	ABC transporter, ATP-binding protein	- none -	41297	43132
fig|6666666.161614.peg.39	CDS	gi_957788172_gb_LMYF01000008_1_Hypsibius_dujardini_scaffold8	44307	43156	1152	Glycosyl transferase	- none -	43156	44307
fig|6666666.161614.peg.40	CDS	gi_957788172_gb_LMYF01000008_1_Hypsibius_dujardini_scaffold8	44547	45614	1068	Glycosyltransferase	- none -	44547	45614
fig|6666666.161614.peg.41	CDS	gi_957788172_gb_LMYF01000008_1_Hypsibius_dujardini_scaffold8	45625	46482	858	hypothetical protein	- none -	45625	46482
fig|6666666.161614.peg.42	CDS	gi_957788172_gb_LMYF01000008_1_Hypsibius_dujardini_scaffold8	46489	47118	630	hypothetical protein	- none -	46489	47118
fig|6666666.161614.peg.43	CDS	gi_957788172_gb_LMYF01000008_1_Hypsibius_dujardini_scaffold8	47233	49173	1941	hypothetical protein	- none -	47233	49173
fig|6666666.161614.peg.44	CDS	gi_957788172_gb_LMYF01000008_1_Hypsibius_dujardini_scaffold8	49193	51403	2211	hypothetical protein	- none -	49193	51403
fig|6666666.161614.peg.45	CDS	gi_957788172_gb_LMYF01000008_1_Hypsibius_dujardini_scaffold8	51750	53249	1500	ATP synthase beta chain (EC 3.6.3.14)	- none -	51750	53249
fig|6666666.161614.peg.46	CDS	gi_957788172_gb_LMYF01000008_1_Hypsibius_dujardini_scaffold8	53260	53517	258	ATP synthase epsilon chain (EC 3.6.3.14)	- none -	53260	53517
fig|6666666.161614.peg.47	CDS	gi_957788172_gb_LMYF01000008_1_Hypsibius_dujardini_scaffold8	54276	53671	606	hypothetical protein	- none -	53671	54276
fig|6666666.161614.peg.48	CDS	gi_957788172_gb_LMYF01000008_1_Hypsibius_dujardini_scaffold8	55207	54473	735	hypothetical protein	- none -	54473	55207
fig|6666666.161614.peg.49	CDS	gi_957788172_gb_LMYF01000008_1_Hypsibius_dujardini_scaffold8	55809	55258	552	UPF0301 protein YqgE	Cluster containing Glutathione synthetase	55258	55809
fig|6666666.161614.peg.50	CDS	gi_957788172_gb_LMYF01000008_1_Hypsibius_dujardini_scaffold8	56008	57345	1338	Two-component system sensor histidine kinase (EC 2.7.3.-)	- none -	56008	57345
fig|6666666.161614.peg.51	CDS	gi_957788172_gb_LMYF01000008_1_Hypsibius_dujardini_scaffold8	58577	57342	1236	S-adenosylmethionine:tRNA ribosyltransferase-isomerase (EC 5.-.-.-)	CBSS-211586.1.peg.2832, Queuosine-Archaeosine Biosynthesis	57342	58577
fig|6666666.161614.peg.52	CDS	gi_957788172_gb_LMYF01000008_1_Hypsibius_dujardini_scaffold8	59028	58618	411	Mll4262 protein	- none -	58618	59028
fig|6666666.161614.peg.53	CDS	gi_957788172_gb_LMYF01000008_1_Hypsibius_dujardini_scaffold8	59292	59759	468	Cell division protein MraZ	16S rRNA modification within P site of ribosome, Bacterial Cell Division, Bacterial Cytoskeleton	59292	59759
fig|6666666.161614.peg.54	CDS	gi_957788172_gb_LMYF01000008_1_Hypsibius_dujardini_scaffold8	59764	60744	981	rRNA small subunit methyltransferase H	16S rRNA modification within P site of ribosome, Bacterial Cell Division	59764	60744
fig|6666666.161614.peg.55	CDS	gi_957788172_gb_LMYF01000008_1_Hypsibius_dujardini_scaffold8	60883	61233	351	Cell division protein FtsL	16S rRNA modification within P site of ribosome, Bacterial Cell Division, Bacterial Cytoskeleton, Stationary phase repair cluster	60883	61233
fig|6666666.161614.peg.56	CDS	gi_957788172_gb_LMYF01000008_1_Hypsibius_dujardini_scaffold8	61309	63420	2112	Cell division protein FtsI [Peptidoglycan synthetase] (EC 2.4.1.129)	16S rRNA modification within P site of ribosome, Bacterial Cell Division, Bacterial Cytoskeleton, Peptidoglycan Biosynthesis	61309	63420
fig|6666666.161614.peg.57	CDS	gi_957788172_gb_LMYF01000008_1_Hypsibius_dujardini_scaffold8	63439	64902	1464	UDP-N-acetylmuramoylalanyl-D-glutamate--2,6-diaminopimelate ligase (EC 6.3.2.13)	Peptidoglycan Biosynthesis, Peptidoglycan biosynthesis--gjo	63439	64902
fig|6666666.161614.peg.58	CDS	gi_957788172_gb_LMYF01000008_1_Hypsibius_dujardini_scaffold8	64931	66208	1278	Phospho-N-acetylmuramoyl-pentapeptide-transferase (EC 2.7.8.13)	Peptidoglycan Biosynthesis	64931	66208
fig|6666666.161614.peg.59	CDS	gi_957788172_gb_LMYF01000008_1_Hypsibius_dujardini_scaffold8	66387	67715	1329	UDP-N-acetylmuramoylalanine--D-glutamate ligase (EC 6.3.2.9)	Peptidoglycan Biosynthesis, Peptidoglycan biosynthesis--gjo	66387	67715
fig|6666666.161614.peg.60	CDS	gi_957788172_gb_LMYF01000008_1_Hypsibius_dujardini_scaffold8	67719	68981	1263	Cell division protein FtsW	Bacterial Cell Division, Bacterial Cytoskeleton, cell division cluster containing FtsQ	67719	68981
fig|6666666.161614.peg.61	CDS	gi_957788172_gb_LMYF01000008_1_Hypsibius_dujardini_scaffold8	68994	70127	1134	UDP-N-acetylglucosamine--N-acetylmuramyl-(pentapeptide) pyrophosphoryl-undecaprenol N-acetylglucosamine transferase (EC 2.4.1.227)	Peptidoglycan Biosynthesis, cell division core of larger cluster	68994	70127
fig|6666666.161614.peg.62	CDS	gi_957788172_gb_LMYF01000008_1_Hypsibius_dujardini_scaffold8	70168	71565	1398	UDP-N-acetylmuramate--alanine ligase (EC 6.3.2.8)	Peptidoglycan Biosynthesis, Peptidoglycan biosynthesis--gjo, cell division cluster containing FtsQ	70168	71565
fig|6666666.161614.peg.63	CDS	gi_957788172_gb_LMYF01000008_1_Hypsibius_dujardini_scaffold8	71613	72635	1023	Cell division protein FtsQ	Bacterial Cell Division, Bacterial Cytoskeleton, cell division cluster containing FtsQ, cell division core of larger cluster	71613	72635
fig|6666666.161614.peg.64	CDS	gi_957788172_gb_LMYF01000008_1_Hypsibius_dujardini_scaffold8	72750	74123	1374	Cell division protein FtsA	Bacterial Cell Division, Bacterial Cytoskeleton, cell division cluster containing FtsQ, cell division core of larger cluster	72750	74123
fig|6666666.161614.peg.65	CDS	gi_957788172_gb_LMYF01000008_1_Hypsibius_dujardini_scaffold8	74209	76200	1992	Cell division protein FtsZ (EC 3.4.24.-)	Bacterial Cell Division, Bacterial Cytoskeleton, cell division cluster containing FtsQ, cell division core of larger cluster	74209	76200
fig|6666666.161614.peg.66	CDS	gi_957788172_gb_LMYF01000008_1_Hypsibius_dujardini_scaffold8	77134	76352	783	hypothetical protein	- none -	76352	77134
fig|6666666.161614.peg.67	CDS	gi_957788172_gb_LMYF01000008_1_Hypsibius_dujardini_scaffold8	78197	77163	1035	ABC transporter, ATP-binding protein	- none -	77163	78197
fig|6666666.161614.peg.68	CDS	gi_957788172_gb_LMYF01000008_1_Hypsibius_dujardini_scaffold8	78205	79128	924	Cell division inhibitor	Persister Cells	78205	79128
fig|6666666.161614.peg.69	CDS	gi_957788172_gb_LMYF01000008_1_Hypsibius_dujardini_scaffold8	80493	79153	1341	ZINC PROTEASE (EC 3.4.99.-)	- none -	79153	80493
fig|6666666.161614.peg.70	CDS	gi_957788172_gb_LMYF01000008_1_Hypsibius_dujardini_scaffold8	81865	80504	1362	zinc protease	- none -	80504	81865
fig|6666666.161614.peg.71	CDS	gi_957788172_gb_LMYF01000008_1_Hypsibius_dujardini_scaffold8	82648	81977	672	hypothetical protein	- none -	81977	82648
fig|6666666.161614.peg.72	CDS	gi_957788172_gb_LMYF01000008_1_Hypsibius_dujardini_scaffold8	83064	82702	363	hypothetical protein	- none -	82702	83064
fig|6666666.161614.peg.73	CDS	gi_957788172_gb_LMYF01000008_1_Hypsibius_dujardini_scaffold8	85453	83075	2379	Enoyl-CoA hydratase [isoleucine degradation] (EC 4.2.1.17) / 3-hydroxyacyl-CoA dehydrogenase (EC 1.1.1.35)	Acetyl-CoA fermentation to Butyrate, Butyrate metabolism cluster, Fatty acid metabolism cluster, Isoleucine degradation, Isoleucine degradation, Polyhydroxybutyrate metabolism, Valine degradation	83075	85453
fig|6666666.161614.peg.74	CDS	gi_957788172_gb_LMYF01000008_1_Hypsibius_dujardini_scaffold8	86110	85556	555	hypothetical protein	- none -	85556	86110
fig|6666666.161614.peg.75	CDS	gi_957788172_gb_LMYF01000008_1_Hypsibius_dujardini_scaffold8	86571	86119	453	hypothetical protein	- none -	86119	86571
fig|6666666.161614.peg.76	CDS	gi_957788172_gb_LMYF01000008_1_Hypsibius_dujardini_scaffold8	90449	86595	3855	hypothetical protein	- none -	86595	90449
fig|6666666.161614.peg.77	CDS	gi_957788172_gb_LMYF01000008_1_Hypsibius_dujardini_scaffold8	92681	90555	2127	Methionyl-tRNA synthetase (EC 6.1.1.10)	tRNA aminoacylation, Met	90555	92681
fig|6666666.161614.peg.78	CDS	gi_957788172_gb_LMYF01000008_1_Hypsibius_dujardini_scaffold8	92723	92863	141	hypothetical protein	- none -	92723	92863
fig|6666666.161614.peg.79	CDS	gi_957788172_gb_LMYF01000008_1_Hypsibius_dujardini_scaffold8	94493	92871	1623	hypothetical protein	- none -	92871	94493
fig|6666666.161614.peg.80	CDS	gi_957788172_gb_LMYF01000008_1_Hypsibius_dujardini_scaffold8	96901	94577	2325	Beta-glucosidase (EC 3.2.1.21)	- none -	94577	96901
fig|6666666.161614.peg.81	CDS	gi_957788172_gb_LMYF01000008_1_Hypsibius_dujardini_scaffold8	97534	96971	564	cAMP-binding proteins - catabolite gene activator and regulatory subunit of cAMP-dependent protein kinases	cAMP signaling in bacteria	96971	97534
fig|6666666.161614.peg.82	CDS	gi_957788172_gb_LMYF01000008_1_Hypsibius_dujardini_scaffold8	97597	98505	909	Muramoyltetrapeptide carboxypeptidase (EC 3.4.17.13)	Metallocarboxypeptidases (EC 3.4.17.-), Murein Hydrolases, Recycling of Peptidoglycan Amino Acids	97597	98505
fig|6666666.161614.peg.83	CDS	gi_957788172_gb_LMYF01000008_1_Hypsibius_dujardini_scaffold8	99372	98533	840	Bem46 protein	- none -	98533	99372
fig|6666666.161614.peg.84	CDS	gi_957788172_gb_LMYF01000008_1_Hypsibius_dujardini_scaffold8	100562	99414	1149	hypothetical protein	- none -	99414	100562
fig|6666666.161614.peg.85	CDS	gi_957788172_gb_LMYF01000008_1_Hypsibius_dujardini_scaffold8	101407	100658	750	Bem46 protein	- none -	100658	101407
fig|6666666.161614.peg.86	CDS	gi_957788172_gb_LMYF01000008_1_Hypsibius_dujardini_scaffold8	103499	101523	1977	Kup system potassium uptake protein	Potassium homeostasis	101523	103499
fig|6666666.161614.peg.87	CDS	gi_957788172_gb_LMYF01000008_1_Hypsibius_dujardini_scaffold8	103772	105298	1527	hypothetical protein	- none -	103772	105298
fig|6666666.161614.peg.88	CDS	gi_957788172_gb_LMYF01000008_1_Hypsibius_dujardini_scaffold8	105404	106315	912	hypothetical protein	- none -	105404	106315
fig|6666666.161614.peg.89	CDS	gi_957788172_gb_LMYF01000008_1_Hypsibius_dujardini_scaffold8	106339	107052	714	Phosphoribosylformylglycinamidine synthase, glutamine amidotransferase subunit (EC 6.3.5.3)	De Novo Purine Biosynthesis	106339	107052
fig|6666666.161614.peg.90	CDS	gi_957788172_gb_LMYF01000008_1_Hypsibius_dujardini_scaffold8	107216	107647	432	Cytochrome c-type biogenesis protein DsbD, protein-disulfide reductase (EC 1.8.1.8)	Biogenesis of c-type cytochromes, Periplasmic disulfide interchange	107216	107647
fig|6666666.161614.peg.91	CDS	gi_957788172_gb_LMYF01000008_1_Hypsibius_dujardini_scaffold8	107719	109659	1941	Cytochrome c-type biogenesis protein DsbD, protein-disulfide reductase (EC 1.8.1.8)	Biogenesis of c-type cytochromes, Periplasmic disulfide interchange	107719	109659
fig|6666666.161614.peg.92	CDS	gi_957788172_gb_LMYF01000008_1_Hypsibius_dujardini_scaffold8	110399	109818	582	RNA polymerase sigma-70 factor, ECF subfamily	- none -	109818	110399
fig|6666666.161614.peg.93	CDS	gi_957788172_gb_LMYF01000008_1_Hypsibius_dujardini_scaffold8	110688	113501	2814	Excinuclease ABC subunit A paralog in greater Bacteroides group	DNA repair, UvrABC system	110688	113501
fig|6666666.161614.peg.94	CDS	gi_957788172_gb_LMYF01000008_1_Hypsibius_dujardini_scaffold8	113918	113502	417	hypothetical protein	- none -	113502	113918
fig|6666666.161614.peg.95	CDS	gi_957788172_gb_LMYF01000008_1_Hypsibius_dujardini_scaffold8	115306	114029	1278	Serine hydroxymethyltransferase (EC 2.1.2.1)	5-FCL-like protein, Glycine Biosynthesis, Glycine and Serine Utilization, Serine-glyoxylate cycle, Serine Biosynthesis	114029	115306
fig|6666666.161614.peg.96	CDS	gi_957788172_gb_LMYF01000008_1_Hypsibius_dujardini_scaffold8	115554	115426	129	hypothetical protein	- none -	115426	115554
fig|6666666.161614.peg.97	CDS	gi_957788172_gb_LMYF01000008_1_Hypsibius_dujardini_scaffold8	115541	116530	990	Glucose-1-phosphate thymidylyltransferase (EC 2.7.7.24)	Rhamnose containing glycans, dTDP-rhamnose synthesis	115541	116530
fig|6666666.161614.peg.98	CDS	gi_957788172_gb_LMYF01000008_1_Hypsibius_dujardini_scaffold8	116595	117548	954	Enoyl-[acyl-carrier-protein] reductase [FMN] (EC 1.3.1.9)	Fatty Acid Biosynthesis FASII	116595	117548
fig|6666666.161614.peg.99	CDS	gi_957788172_gb_LMYF01000008_1_Hypsibius_dujardini_scaffold8	117604	118011	408	hypothetical protein	- none -	117604	118011
fig|6666666.161614.peg.100	CDS	gi_957788172_gb_LMYF01000008_1_Hypsibius_dujardini_scaffold8	118904	118083	822	Regulatory sensor-transducer, BlaR1/MecR1 family	- none -	118083	118904
fig|6666666.161614.peg.101	CDS	gi_957788172_gb_LMYF01000008_1_Hypsibius_dujardini_scaffold8	120334	119057	1278	conserved hypothetical protein [KO:K01992]	- none -	119057	120334
fig|6666666.161614.peg.102	CDS	gi_957788172_gb_LMYF01000008_1_Hypsibius_dujardini_scaffold8	121295	120360	936	ABC transporter, ATP-binding protein	- none -	120360	121295
fig|6666666.161614.peg.103	CDS	gi_957788172_gb_LMYF01000008_1_Hypsibius_dujardini_scaffold8	121461	122459	999	hypothetical protein	- none -	121461	122459
fig|6666666.161614.peg.104	CDS	gi_957788172_gb_LMYF01000008_1_Hypsibius_dujardini_scaffold8	123999	122425	1575	NAD(FAD)-utilizing dehydrogenase, sll0175 homolog	- none -	122425	123999
fig|6666666.161614.peg.105	CDS	gi_957788172_gb_LMYF01000008_1_Hypsibius_dujardini_scaffold8	124131	124012	120	hypothetical protein	- none -	124012	124131
fig|6666666.161614.peg.106	CDS	gi_957788172_gb_LMYF01000008_1_Hypsibius_dujardini_scaffold8	124142	124888	747	5'-nucleotidase (EC 3.1.3.5)	Purine conversions, pyrimidine conversions	124142	124888
fig|6666666.161614.peg.107	CDS	gi_957788172_gb_LMYF01000008_1_Hypsibius_dujardini_scaffold8	124878	125816	939	5'-nucleotidase (EC 3.1.3.5)	Purine conversions, pyrimidine conversions	124878	125816
fig|6666666.161614.peg.108	CDS	gi_957788172_gb_LMYF01000008_1_Hypsibius_dujardini_scaffold8	125950	127383	1434	Chromosomal replication initiator protein DnaA	Cell Division Subsystem including YidCD, DNA replication cluster 1	125950	127383
fig|6666666.161614.rna.1	RNA	gi_957788172_gb_LMYF01000008_1_Hypsibius_dujardini_scaffold8	127547	127637	91	tRNA-Ser-GCT	- none -	127547	127637
fig|6666666.161614.rna.2	RNA	gi_957788172_gb_LMYF01000008_1_Hypsibius_dujardini_scaffold8	127675	127748	74	tRNA-Pro-TGG	- none -	127675	127748
fig|6666666.161614.peg.109	CDS	gi_957788172_gb_LMYF01000008_1_Hypsibius_dujardini_scaffold8	128002	129252	1251	Transposase	- none -	128002	129252
fig|6666666.161614.peg.110	CDS	gi_957788172_gb_LMYF01000008_1_Hypsibius_dujardini_scaffold8	129263	130411	1149	Putative cytoplasmic protein	- none -	129263	130411
fig|6666666.161614.peg.111	CDS	gi_957788172_gb_LMYF01000008_1_Hypsibius_dujardini_scaffold8	131783	130755	1029	hypothetical protein	- none -	130755	131783
fig|6666666.161614.peg.112	CDS	gi_957788172_gb_LMYF01000008_1_Hypsibius_dujardini_scaffold8	133833	131854	1980	Putative mobilization protein BF0133	Conjugative transposon, Bacteroidales	131854	133833
fig|6666666.161614.peg.113	CDS	gi_957788172_gb_LMYF01000008_1_Hypsibius_dujardini_scaffold8	134995	133850	1146	Putative conjugative transposon mobilization protein BF0132	Conjugative transposon, Bacteroidales	133850	134995
fig|6666666.161614.peg.114	CDS	gi_957788172_gb_LMYF01000008_1_Hypsibius_dujardini_scaffold8	135498	135103	396	hypothetical protein clusted with conjugative transposons, BF0131	Conjugative transposon, Bacteroidales	135103	135498
fig|6666666.161614.peg.115	CDS	gi_957788172_gb_LMYF01000008_1_Hypsibius_dujardini_scaffold8	135765	136058	294	hypothetical protein	- none -	135765	136058
fig|6666666.161614.peg.116	CDS	gi_957788172_gb_LMYF01000008_1_Hypsibius_dujardini_scaffold8	136586	136116	471	DNA repair protein RadC	Bacterial cell division cluster, DNA repair, bacterial	136116	136586
fig|6666666.161614.peg.117	CDS	gi_957788172_gb_LMYF01000008_1_Hypsibius_dujardini_scaffold8	137340	136876	465	hypothetical protein	- none -	136876	137340
fig|6666666.161614.peg.118	CDS	gi_957788172_gb_LMYF01000008_1_Hypsibius_dujardini_scaffold8	138459	137413	1047	Mycobacteriophage Barnyard protein gp56	- none -	137413	138459
fig|6666666.161614.peg.119	CDS	gi_957788172_gb_LMYF01000008_1_Hypsibius_dujardini_scaffold8	138981	138592	390	hypothetical protein	- none -	138592	138981
fig|6666666.161614.peg.120	CDS	gi_957788172_gb_LMYF01000008_1_Hypsibius_dujardini_scaffold8	138971	139177	207	hypothetical protein	- none -	138971	139177
fig|6666666.161614.peg.121	CDS	gi_957788172_gb_LMYF01000008_1_Hypsibius_dujardini_scaffold8	140065	139442	624	(AJ250023) putative polyketide synthase	- none -	139442	140065
fig|6666666.161614.peg.122	CDS	gi_957788172_gb_LMYF01000008_1_Hypsibius_dujardini_scaffold8	140914	140156	759	3-oxoacyl-[acyl-carrier protein] reductase (EC 1.1.1.100)	Fatty Acid Biosynthesis FASII	140156	140914
fig|6666666.161614.peg.123	CDS	gi_957788172_gb_LMYF01000008_1_Hypsibius_dujardini_scaffold8	141728	140976	753	3-oxoacyl-[acyl-carrier protein] reductase (EC 1.1.1.100)	Fatty Acid Biosynthesis FASII	140976	141728
fig|6666666.161614.peg.124	CDS	gi_957788172_gb_LMYF01000008_1_Hypsibius_dujardini_scaffold8	142016	142186	171	hypothetical protein	- none -	142016	142186
fig|6666666.161614.peg.125	CDS	gi_957788172_gb_LMYF01000008_1_Hypsibius_dujardini_scaffold8	142485	142769	285	hypothetical protein	- none -	142485	142769
fig|6666666.161614.peg.126	CDS	gi_957788172_gb_LMYF01000008_1_Hypsibius_dujardini_scaffold8	142948	143571	624	hypothetical protein	- none -	142948	143571
fig|6666666.161614.peg.127	CDS	gi_957788172_gb_LMYF01000008_1_Hypsibius_dujardini_scaffold8	143602	145410	1809	hypothetical protein	- none -	143602	145410
fig|6666666.161614.peg.128	CDS	gi_957788172_gb_LMYF01000008_1_Hypsibius_dujardini_scaffold8	145431	146906	1476	hypothetical protein	- none -	145431	146906
fig|6666666.161614.peg.129	CDS	gi_957788172_gb_LMYF01000008_1_Hypsibius_dujardini_scaffold8	146906	148924	2019	hypothetical protein	- none -	146906	148924
fig|6666666.161614.peg.130	CDS	gi_957788172_gb_LMYF01000008_1_Hypsibius_dujardini_scaffold8	149114	149461	348	hypothetical protein	- none -	149114	149461
fig|6666666.161614.peg.131	CDS	gi_957788172_gb_LMYF01000008_1_Hypsibius_dujardini_scaffold8	149593	149832	240	hypothetical protein	- none -	149593	149832
fig|6666666.161614.peg.132	CDS	gi_957788172_gb_LMYF01000008_1_Hypsibius_dujardini_scaffold8	149836	151146	1311	hypothetical protein	- none -	149836	151146
fig|6666666.161614.peg.133	CDS	gi_957788172_gb_LMYF01000008_1_Hypsibius_dujardini_scaffold8	151171	152193	1023	hypothetical protein	- none -	151171	152193
fig|6666666.161614.peg.134	CDS	gi_957788172_gb_LMYF01000008_1_Hypsibius_dujardini_scaffold8	152602	152201	402	hypothetical protein	- none -	152201	152602
fig|6666666.161614.peg.135	CDS	gi_957788172_gb_LMYF01000008_1_Hypsibius_dujardini_scaffold8	152674	152799	126	hypothetical protein	- none -	152674	152799
fig|6666666.161614.peg.136	CDS	gi_957788172_gb_LMYF01000008_1_Hypsibius_dujardini_scaffold8	152938	153327	390	Endoribonuclease L-PSP	CBSS-176299.4.peg.1996A	152938	153327
fig|6666666.161614.peg.137	CDS	gi_957788172_gb_LMYF01000008_1_Hypsibius_dujardini_scaffold8	153385	153825	441	hypothetical protein	- none -	153385	153825
fig|6666666.161614.peg.138	CDS	gi_957788172_gb_LMYF01000008_1_Hypsibius_dujardini_scaffold8	153838	154716	879	hypothetical protein	- none -	153838	154716
fig|6666666.161614.peg.139	CDS	gi_957788172_gb_LMYF01000008_1_Hypsibius_dujardini_scaffold8	155007	157538	2532	hypothetical protein	- none -	155007	157538
fig|6666666.161614.peg.140	CDS	gi_957788172_gb_LMYF01000008_1_Hypsibius_dujardini_scaffold8	158073	158690	618	Probable RNA polymerase sigma factor	- none -	158073	158690
fig|6666666.161614.peg.141	CDS	gi_957788172_gb_LMYF01000008_1_Hypsibius_dujardini_scaffold8	158959	159405	447	Peptide methionine sulfoxide reductase MsrB (EC 1.8.4.12)	Peptide methionine sulfoxide reductase	158959	159405
fig|6666666.161614.peg.142	CDS	gi_957788172_gb_LMYF01000008_1_Hypsibius_dujardini_scaffold8	159467	159958	492	Peptide methionine sulfoxide reductase MsrA (EC 1.8.4.11)	Peptide methionine sulfoxide reductase	159467	159958
fig|6666666.161614.peg.143	CDS	gi_957788172_gb_LMYF01000008_1_Hypsibius_dujardini_scaffold8	160205	160696	492	hypothetical protein	- none -	160205	160696
fig|6666666.161614.peg.144	CDS	gi_957788172_gb_LMYF01000008_1_Hypsibius_dujardini_scaffold8	160849	161838	990	Peptide methionine sulfoxide reductase MsrB (EC 1.8.4.12)	Peptide methionine sulfoxide reductase	160849	161838
fig|6666666.161614.peg.145	CDS	gi_957788172_gb_LMYF01000008_1_Hypsibius_dujardini_scaffold8	161877	162146	270	hypothetical protein	- none -	161877	162146
fig|6666666.161614.peg.146	CDS	gi_957788172_gb_LMYF01000008_1_Hypsibius_dujardini_scaffold8	162156	163706	1551	Selenoprotein O and cysteine-containing homologs	Selenoprotein O	162156	163706
fig|6666666.161614.peg.147	CDS	gi_957788172_gb_LMYF01000008_1_Hypsibius_dujardini_scaffold8	163846	164055	210	hypothetical protein	- none -	163846	164055
fig|6666666.161614.peg.148	CDS	gi_957788172_gb_LMYF01000008_1_Hypsibius_dujardini_scaffold8	164117	164662	546	hypothetical protein	- none -	164117	164662
fig|6666666.161614.peg.149	CDS	gi_957788172_gb_LMYF01000008_1_Hypsibius_dujardini_scaffold8	164705	165391	687	hypothetical protein	- none -	164705	165391
fig|6666666.161614.peg.150	CDS	gi_957788172_gb_LMYF01000008_1_Hypsibius_dujardini_scaffold8	165461	165772	312	hypothetical protein	- none -	165461	165772
fig|6666666.161614.peg.151	CDS	gi_957788172_gb_LMYF01000008_1_Hypsibius_dujardini_scaffold8	165838	166122	285	hypothetical protein	- none -	165838	166122
fig|6666666.161614.peg.152	CDS	gi_957788172_gb_LMYF01000008_1_Hypsibius_dujardini_scaffold8	166122	167612	1491	Glycine betaine transporter OpuD	Choline and Betaine Uptake and Betaine Biosynthesis	166122	167612
fig|6666666.161614.peg.153	CDS	gi_957788172_gb_LMYF01000008_1_Hypsibius_dujardini_scaffold8	167609	168553	945	hypothetical protein	- none -	167609	168553
fig|6666666.161614.peg.154	CDS	gi_957788172_gb_LMYF01000008_1_Hypsibius_dujardini_scaffold8	168585	169739	1155	hypothetical protein	- none -	168585	169739
fig|6666666.161614.peg.155	CDS	gi_957788172_gb_LMYF01000008_1_Hypsibius_dujardini_scaffold8	169755	170993	1239	Bll2902 protein	- none -	169755	170993
fig|6666666.161614.peg.156	CDS	gi_957788172_gb_LMYF01000008_1_Hypsibius_dujardini_scaffold8	171020	171715	696	3-dehydroquinate dehydratase( EC:4.2.1.10 )	- none -	171020	171715
fig|6666666.161614.peg.157	CDS	gi_957788172_gb_LMYF01000008_1_Hypsibius_dujardini_scaffold8	171726	172256	531	Peptide methionine sulfoxide reductase MsrA (EC 1.8.4.11)	Peptide methionine sulfoxide reductase	171726	172256
fig|6666666.161614.peg.158	CDS	gi_957788172_gb_LMYF01000008_1_Hypsibius_dujardini_scaffold8	172264	173085	822	Transcriptional regulator, AraC family	- none -	172264	173085
fig|6666666.161614.peg.159	CDS	gi_957788172_gb_LMYF01000008_1_Hypsibius_dujardini_scaffold8	173212	173655	444	Peptide methionine sulfoxide reductase MsrB (EC 1.8.4.12)	Peptide methionine sulfoxide reductase	173212	173655
fig|6666666.161614.peg.160	CDS	gi_957788172_gb_LMYF01000008_1_Hypsibius_dujardini_scaffold8	173676	174167	492	Peptide methionine sulfoxide reductase MsrA (EC 1.8.4.11)	Peptide methionine sulfoxide reductase	173676	174167
fig|6666666.161614.peg.161	CDS	gi_957788172_gb_LMYF01000008_1_Hypsibius_dujardini_scaffold8	174353	174835	483	Peptide methionine sulfoxide reductase MsrA (EC 1.8.4.11)	Peptide methionine sulfoxide reductase	174353	174835
fig|6666666.161614.peg.162	CDS	gi_957788172_gb_LMYF01000008_1_Hypsibius_dujardini_scaffold8	174879	175793	915	hypothetical protein	- none -	174879	175793
fig|6666666.161614.peg.163	CDS	gi_957788172_gb_LMYF01000008_1_Hypsibius_dujardini_scaffold8	176331	177818	1488	Cysteinyl-tRNA synthetase (EC 6.1.1.16)	tRNA aminoacylation, Cys	176331	177818
fig|6666666.161614.peg.164	CDS	gi_957788172_gb_LMYF01000008_1_Hypsibius_dujardini_scaffold8	178198	178653	456	sigma factor	- none -	178198	178653
fig|6666666.161614.peg.165	CDS	gi_957788172_gb_LMYF01000008_1_Hypsibius_dujardini_scaffold8	178675	178971	297	hypothetical protein	- none -	178675	178971
fig|6666666.161614.peg.166	CDS	gi_957788172_gb_LMYF01000008_1_Hypsibius_dujardini_scaffold8	179042	180835	1794	Arginyl-tRNA synthetase (EC 6.1.1.19)	tRNA aminoacylation, Arg	179042	180835
fig|6666666.161614.peg.167	CDS	gi_957788172_gb_LMYF01000008_1_Hypsibius_dujardini_scaffold8	181015	181434	420	Ferritin-like protein 2	- none -	181015	181434
fig|6666666.161614.peg.168	CDS	gi_957788172_gb_LMYF01000008_1_Hypsibius_dujardini_scaffold8	181468	182208	741	hypothetical protein	- none -	181468	182208
fig|6666666.161614.peg.169	CDS	gi_957788172_gb_LMYF01000008_1_Hypsibius_dujardini_scaffold8	183128	183331	204	hypothetical protein	- none -	183128	183331
fig|6666666.161614.peg.170	CDS	gi_957788172_gb_LMYF01000008_1_Hypsibius_dujardini_scaffold8	183482	183291	192	hypothetical protein	- none -	183291	183482
fig|6666666.161614.peg.171	CDS	gi_957788172_gb_LMYF01000008_1_Hypsibius_dujardini_scaffold8	183539	183997	459	Peptide methionine sulfoxide reductase MsrB (EC 1.8.4.12)	Peptide methionine sulfoxide reductase	183539	183997
fig|6666666.161614.peg.172	CDS	gi_957788172_gb_LMYF01000008_1_Hypsibius_dujardini_scaffold8	184018	184956	939	Bifunctional protein: zinc-containing alcohol dehydrogenase; quinone oxidoreductase ( NADPH:quinone reductase) (EC 1.1.1.-); Similar to arginate lyase	- none -	184018	184956
fig|6666666.161614.peg.173	CDS	gi_957788172_gb_LMYF01000008_1_Hypsibius_dujardini_scaffold8	185316	185474	159	hypothetical protein	- none -	185316	185474
fig|6666666.161614.peg.174	CDS	gi_957788172_gb_LMYF01000008_1_Hypsibius_dujardini_scaffold8	185571	187136	1566	Beta-lactamase (EC 3.5.2.6)	Beta-lactamase	185571	187136
fig|6666666.161614.peg.175	CDS	gi_957788172_gb_LMYF01000008_1_Hypsibius_dujardini_scaffold8	187195	188145	951	L-fuco-beta-pyranose dehydrogenase (EC 1.1.1.122)	- none -	187195	188145
fig|6666666.161614.peg.176	CDS	gi_957788172_gb_LMYF01000008_1_Hypsibius_dujardini_scaffold8	188757	189650	894	NAD-dependent glyceraldehyde-3-phosphate dehydrogenase (EC 1.2.1.12)	Entner-Doudoroff Pathway, Glycolysis and Gluconeogenesis, Pyridoxin (Vitamin B6) Biosynthesis	188757	189650
fig|6666666.161614.peg.177	CDS	gi_957788172_gb_LMYF01000008_1_Hypsibius_dujardini_scaffold8	189850	190137	288	hypothetical protein	- none -	189850	190137
fig|6666666.161614.peg.178	CDS	gi_957788172_gb_LMYF01000008_1_Hypsibius_dujardini_scaffold8	190549	191568	1020	hypothetical protein	- none -	190549	191568
fig|6666666.161614.peg.179	CDS	gi_957788172_gb_LMYF01000008_1_Hypsibius_dujardini_scaffold8	191729	192082	354	Thioredoxin	- none -	191729	192082
fig|6666666.161614.peg.180	CDS	gi_957788172_gb_LMYF01000008_1_Hypsibius_dujardini_scaffold8	192418	192909	492	Peptide methionine sulfoxide reductase MsrA (EC 1.8.4.11)	Peptide methionine sulfoxide reductase	192418	192909
fig|6666666.161614.peg.181	CDS	gi_957788172_gb_LMYF01000008_1_Hypsibius_dujardini_scaffold8	192965	193846	882	NADPH:quinone oxidoreductase 2	NADPH:quinone oxidoreductase 2	192965	193846
fig|6666666.161614.peg.182	CDS	gi_957788172_gb_LMYF01000008_1_Hypsibius_dujardini_scaffold8	193977	194795	819	Transcriptional regulator, AraC family	- none -	193977	194795
fig|6666666.161614.peg.183	CDS	gi_957788172_gb_LMYF01000008_1_Hypsibius_dujardini_scaffold8	195003	195884	882	hypothetical protein	- none -	195003	195884
fig|6666666.161614.peg.184	CDS	gi_957788172_gb_LMYF01000008_1_Hypsibius_dujardini_scaffold8	195988	195857	132	hypothetical protein	- none -	195857	195988
fig|6666666.161614.peg.185	CDS	gi_957788172_gb_LMYF01000008_1_Hypsibius_dujardini_scaffold8	196253	196951	699	Transcriptional regulator, AraC family	- none -	196253	196951
fig|6666666.161614.peg.186	CDS	gi_957788172_gb_LMYF01000008_1_Hypsibius_dujardini_scaffold8	198904	197672	1233	hypothetical protein	- none -	197672	198904
fig|6666666.161614.peg.187	CDS	gi_957788172_gb_LMYF01000008_1_Hypsibius_dujardini_scaffold8	199080	198967	114	hypothetical protein	- none -	198967	199080
fig|6666666.161614.peg.188	CDS	gi_957788172_gb_LMYF01000008_1_Hypsibius_dujardini_scaffold8	199602	200138	537	RNA polymerase ECF-type sigma factor	- none -	199602	200138
fig|6666666.161614.peg.189	CDS	gi_957788172_gb_LMYF01000008_1_Hypsibius_dujardini_scaffold8	200235	201401	1167	putative anti-sigma factor	- none -	200235	201401
fig|6666666.161614.peg.190	CDS	gi_957788172_gb_LMYF01000008_1_Hypsibius_dujardini_scaffold8	201512	204742	3231	TonB-dependent receptor	Ton and Tol transport systems	201512	204742
fig|6666666.161614.peg.191	CDS	gi_957788172_gb_LMYF01000008_1_Hypsibius_dujardini_scaffold8	204749	206107	1359	hypothetical protein	- none -	204749	206107
fig|6666666.161614.peg.192	CDS	gi_957788172_gb_LMYF01000008_1_Hypsibius_dujardini_scaffold8	206135	207373	1239	hypothetical protein	- none -	206135	207373
fig|6666666.161614.peg.193	CDS	gi_957788172_gb_LMYF01000008_1_Hypsibius_dujardini_scaffold8	208318	209160	843	hypothetical protein	- none -	208318	209160
fig|6666666.161614.peg.194	CDS	gi_957788172_gb_LMYF01000008_1_Hypsibius_dujardini_scaffold8	209506	209390	117	hypothetical protein	- none -	209390	209506
fig|6666666.161614.peg.195	CDS	gi_957788172_gb_LMYF01000008_1_Hypsibius_dujardini_scaffold8	209895	210179	285	hypothetical protein	- none -	209895	210179
fig|6666666.161614.peg.196	CDS	gi_957788172_gb_LMYF01000008_1_Hypsibius_dujardini_scaffold8	210267	210587	321	Conjugative transposon protein TraE	Conjugative transposon, Bacteroidales	210267	210587
fig|6666666.161614.peg.197	CDS	gi_957788172_gb_LMYF01000008_1_Hypsibius_dujardini_scaffold8	210650	211864	1215	hypothetical protein	- none -	210650	211864
fig|6666666.161614.peg.198	CDS	gi_957788172_gb_LMYF01000008_1_Hypsibius_dujardini_scaffold8	211854	212180	327	Conjugative transposon protein TraF	Conjugative transposon, Bacteroidales	211854	212180
fig|6666666.161614.peg.199	CDS	gi_957788172_gb_LMYF01000008_1_Hypsibius_dujardini_scaffold8	212191	214656	2466	Conjugative transposon protein TraG	Conjugative transposon, Bacteroidales	212191	214656
fig|6666666.161614.peg.200	CDS	gi_957788172_gb_LMYF01000008_1_Hypsibius_dujardini_scaffold8	214685	215413	729	hypothetical protein	- none -	214685	215413
fig|6666666.161614.peg.201	CDS	gi_957788172_gb_LMYF01000008_1_Hypsibius_dujardini_scaffold8	215486	215782	297	hypothetical protein	- none -	215486	215782
fig|6666666.161614.peg.202	CDS	gi_957788172_gb_LMYF01000008_1_Hypsibius_dujardini_scaffold8	215779	216435	657	Conjugative transposon protein TraI	Conjugative transposon, Bacteroidales	215779	216435
fig|6666666.161614.peg.203	CDS	gi_957788172_gb_LMYF01000008_1_Hypsibius_dujardini_scaffold8	216447	217061	615	Conjugative transposon protein TraI	Conjugative transposon, Bacteroidales	216447	217061
fig|6666666.161614.peg.204	CDS	gi_957788172_gb_LMYF01000008_1_Hypsibius_dujardini_scaffold8	217058	217675	618	Conjugative transposon protein TraI	Conjugative transposon, Bacteroidales	217058	217675
fig|6666666.161614.peg.205	CDS	gi_957788172_gb_LMYF01000008_1_Hypsibius_dujardini_scaffold8	217705	218859	1155	Conjugative transposon protein TraJ	Conjugative transposon, Bacteroidales	217705	218859
fig|6666666.161614.peg.206	CDS	gi_957788172_gb_LMYF01000008_1_Hypsibius_dujardini_scaffold8	218859	219479	621	Conjugative transposon protein TraK	Conjugative transposon, Bacteroidales	218859	219479
fig|6666666.161614.peg.207	CDS	gi_957788172_gb_LMYF01000008_1_Hypsibius_dujardini_scaffold8	219479	219916	438	hypothetical protein	- none -	219479	219916
fig|6666666.161614.peg.208	CDS	gi_957788172_gb_LMYF01000008_1_Hypsibius_dujardini_scaffold8	219917	221134	1218	Conjugative transposon protein TraM	Conjugative transposon, Bacteroidales	219917	221134
fig|6666666.161614.peg.209	CDS	gi_957788172_gb_LMYF01000008_1_Hypsibius_dujardini_scaffold8	221131	221889	759	Conjugative transposon protein TraN	Conjugative transposon, Bacteroidales	221131	221889
fig|6666666.161614.peg.210	CDS	gi_957788172_gb_LMYF01000008_1_Hypsibius_dujardini_scaffold8	221954	223081	1128	hypothetical protein	- none -	221954	223081
fig|6666666.161614.peg.211	CDS	gi_957788172_gb_LMYF01000008_1_Hypsibius_dujardini_scaffold8	223113	223358	246	hypothetical protein	- none -	223113	223358
fig|6666666.161614.peg.212	CDS	gi_957788172_gb_LMYF01000008_1_Hypsibius_dujardini_scaffold8	223404	223667	264	hypothetical protein	- none -	223404	223667
fig|6666666.161614.peg.213	CDS	gi_957788172_gb_LMYF01000008_1_Hypsibius_dujardini_scaffold8	223755	226979	3225	hypothetical protein	- none -	223755	226979
fig|6666666.161614.peg.214	CDS	gi_957788172_gb_LMYF01000008_1_Hypsibius_dujardini_scaffold8	227992	227231	762	2-deoxy-D-gluconate 3-dehydrogenase (EC 1.1.1.125)	D-Galacturonate and D-Glucuronate Utilization	227231	227992
fig|6666666.161614.peg.215	CDS	gi_957788172_gb_LMYF01000008_1_Hypsibius_dujardini_scaffold8	228841	228011	831	4-deoxy-L-threo-5-hexosulose-uronate ketol-isomerase (EC 5.3.1.17)	D-Galacturonate and D-Glucuronate Utilization	228011	228841
fig|6666666.161614.peg.216	CDS	gi_957788172_gb_LMYF01000008_1_Hypsibius_dujardini_scaffold8	229695	228949	747	Undecaprenyl-phosphate galactosephosphotransferase (EC 2.7.8.6)	Exopolysaccharide Biosynthesis	228949	229695
fig|6666666.161614.peg.217	CDS	gi_957788172_gb_LMYF01000008_1_Hypsibius_dujardini_scaffold8	229760	230743	984	hypothetical protein	- none -	229760	230743
fig|6666666.161614.peg.218	CDS	gi_957788172_gb_LMYF01000008_1_Hypsibius_dujardini_scaffold8	231545	230718	828	SAM-dependent methyltransferases	- none -	230718	231545
fig|6666666.161614.peg.219	CDS	gi_957788172_gb_LMYF01000008_1_Hypsibius_dujardini_scaffold8	233008	231542	1467	Radical SAM domain protein	- none -	231542	233008
fig|6666666.161614.peg.220	CDS	gi_957788172_gb_LMYF01000008_1_Hypsibius_dujardini_scaffold8	233944	233015	930	radical SAM domain protein	- none -	233015	233944
fig|6666666.161614.peg.221	CDS	gi_957788172_gb_LMYF01000008_1_Hypsibius_dujardini_scaffold8	234840	234064	777	Methyltransferase type 11	- none -	234064	234840
fig|6666666.161614.peg.222	CDS	gi_957788172_gb_LMYF01000008_1_Hypsibius_dujardini_scaffold8	236354	234852	1503	Radical SAM domain protein	- none -	234852	236354
fig|6666666.161614.peg.223	CDS	gi_957788172_gb_LMYF01000008_1_Hypsibius_dujardini_scaffold8	236442	237182	741	Putative methyltransferase	- none -	236442	237182
fig|6666666.161614.peg.224	CDS	gi_957788172_gb_LMYF01000008_1_Hypsibius_dujardini_scaffold8	237169	238311	1143	chlorohydrolase family protein	- none -	237169	238311
fig|6666666.161614.peg.225	CDS	gi_957788172_gb_LMYF01000008_1_Hypsibius_dujardini_scaffold8	238675	238872	198	hypothetical protein	- none -	238675	238872
fig|6666666.161614.peg.226	CDS	gi_957788172_gb_LMYF01000008_1_Hypsibius_dujardini_scaffold8	238890	239429	540	Glycosyltransferase	- none -	238890	239429
fig|6666666.161614.peg.227	CDS	gi_957788172_gb_LMYF01000008_1_Hypsibius_dujardini_scaffold8	240023	239415	609	Glycosyltransferase (EC 2.4.1.-)	- none -	239415	240023
fig|6666666.161614.peg.228	CDS	gi_957788172_gb_LMYF01000008_1_Hypsibius_dujardini_scaffold8	240289	240176	114	hypothetical protein	- none -	240176	240289
fig|6666666.161614.peg.229	CDS	gi_957788172_gb_LMYF01000008_1_Hypsibius_dujardini_scaffold8	241284	240460	825	Glycosyl transferase, family 2	- none -	240460	241284
fig|6666666.161614.peg.230	CDS	gi_957788172_gb_LMYF01000008_1_Hypsibius_dujardini_scaffold8	242576	241296	1281	hypothetical protein	- none -	241296	242576
fig|6666666.161614.peg.231	CDS	gi_957788172_gb_LMYF01000008_1_Hypsibius_dujardini_scaffold8	243682	242573	1110	Alpha-D-GlcNAc alpha-1,2-L-rhamnosyltransferase (EC 2.4.1.-)	Rhamnose containing glycans	242573	243682
fig|6666666.161614.peg.232	CDS	gi_957788172_gb_LMYF01000008_1_Hypsibius_dujardini_scaffold8	244731	243679	1053	glycosyl transferase group 1	- none -	243679	244731
fig|6666666.161614.peg.233	CDS	gi_957788172_gb_LMYF01000008_1_Hypsibius_dujardini_scaffold8	245722	244766	957	hypothetical protein	- none -	244766	245722
fig|6666666.161614.peg.234	CDS	gi_957788172_gb_LMYF01000008_1_Hypsibius_dujardini_scaffold8	247328	245712	1617	hypothetical protein	- none -	245712	247328
fig|6666666.161614.peg.235	CDS	gi_957788172_gb_LMYF01000008_1_Hypsibius_dujardini_scaffold8	248206	247325	882	hypothetical protein	- none -	247325	248206
fig|6666666.161614.peg.236	CDS	gi_957788172_gb_LMYF01000008_1_Hypsibius_dujardini_scaffold8	249671	248199	1473	hypothetical protein	- none -	248199	249671
fig|6666666.161614.peg.237	CDS	gi_957788172_gb_LMYF01000008_1_Hypsibius_dujardini_scaffold8	249779	250759	981	dTDP-glucose 4,6-dehydratase (EC 4.2.1.46)	CBSS-296591.1.peg.2330, Rhamnose containing glycans, dTDP-rhamnose synthesis	249779	250759
fig|6666666.161614.peg.238	CDS	gi_957788172_gb_LMYF01000008_1_Hypsibius_dujardini_scaffold8	251743	250754	990	Glycosyl transferase, family 2	- none -	250754	251743
fig|6666666.161614.peg.239	CDS	gi_957788172_gb_LMYF01000008_1_Hypsibius_dujardini_scaffold8	253073	251814	1260	Homoserine dehydrogenase (EC 1.1.1.3)	Methionine Biosynthesis, Threonine and Homoserine Biosynthesis	251814	253073
fig|6666666.161614.peg.240	CDS	gi_957788172_gb_LMYF01000008_1_Hypsibius_dujardini_scaffold8	254133	253075	1059	Homoserine O-acetyltransferase (EC 2.3.1.31)	Methionine Biosynthesis	253075	254133
fig|6666666.161614.peg.241	CDS	gi_957788172_gb_LMYF01000008_1_Hypsibius_dujardini_scaffold8	255460	254135	1326	O-acetylhomoserine sulfhydrylase (EC 2.5.1.49) / O-succinylhomoserine sulfhydrylase (EC 2.5.1.48)	Methionine Biosynthesis, Methionine Biosynthesis	254135	255460
fig|6666666.161614.peg.242	CDS	gi_957788172_gb_LMYF01000008_1_Hypsibius_dujardini_scaffold8	256447	255899	549	hypothetical protein	- none -	255899	256447
fig|6666666.161614.peg.243	CDS	gi_957788172_gb_LMYF01000008_1_Hypsibius_dujardini_scaffold8	257263	256541	723	hypothetical protein	- none -	256541	257263
fig|6666666.161614.peg.244	CDS	gi_957788172_gb_LMYF01000008_1_Hypsibius_dujardini_scaffold8	257386	260253	2868	Excinuclease ABC subunit A	DNA repair, UvrABC system	257386	260253
fig|6666666.161614.peg.245	CDS	gi_957788172_gb_LMYF01000008_1_Hypsibius_dujardini_scaffold8	260915	260301	615	probable membrane protein YPO2362	- none -	260301	260915
fig|6666666.161614.peg.246	CDS	gi_957788172_gb_LMYF01000008_1_Hypsibius_dujardini_scaffold8	261184	261029	156	hypothetical protein	- none -	261029	261184
fig|6666666.161614.peg.247	CDS	gi_957788172_gb_LMYF01000008_1_Hypsibius_dujardini_scaffold8	261805	261425	381	hypothetical protein	- none -	261425	261805
fig|6666666.161614.peg.248	CDS	gi_957788172_gb_LMYF01000008_1_Hypsibius_dujardini_scaffold8	262624	261830	795	hypothetical protein	- none -	261830	262624
fig|6666666.161614.peg.249	CDS	gi_957788172_gb_LMYF01000008_1_Hypsibius_dujardini_scaffold8	263395	262952	444	ElaA protein	cAMP signaling in bacteria	262952	263395
fig|6666666.161614.peg.250	CDS	gi_957788172_gb_LMYF01000008_1_Hypsibius_dujardini_scaffold8	264682	263405	1278	ATPase, AAA family	- none -	263405	264682
fig|6666666.161614.peg.251	CDS	gi_957788172_gb_LMYF01000008_1_Hypsibius_dujardini_scaffold8	265223	264726	498	hypothetical protein	- none -	264726	265223
fig|6666666.161614.peg.252	CDS	gi_957788172_gb_LMYF01000008_1_Hypsibius_dujardini_scaffold8	266080	265226	855	Esterase/lipase	- none -	265226	266080
fig|6666666.161614.peg.253	CDS	gi_957788172_gb_LMYF01000008_1_Hypsibius_dujardini_scaffold8	266197	267570	1374	Serine protease precursor MucD/AlgY associated with sigma factor RpoE	Transcription initiation, bacterial sigma factors	266197	267570
fig|6666666.161614.peg.254	CDS	gi_957788172_gb_LMYF01000008_1_Hypsibius_dujardini_scaffold8	268068	267571	498	hypothetical protein	- none -	267571	268068
fig|6666666.161614.peg.255	CDS	gi_957788172_gb_LMYF01000008_1_Hypsibius_dujardini_scaffold8	268577	268092	486	hypothetical protein	- none -	268092	268577
fig|6666666.161614.peg.256	CDS	gi_957788172_gb_LMYF01000008_1_Hypsibius_dujardini_scaffold8	270403	268577	1827	Aspartyl-tRNA synthetase (EC 6.1.1.12)	tRNA aminoacylation, Asp and Asn	268577	270403
fig|6666666.161614.peg.257	CDS	gi_957788172_gb_LMYF01000008_1_Hypsibius_dujardini_scaffold8	270555	271295	741	hypothetical protein	- none -	270555	271295
fig|6666666.161614.peg.258	CDS	gi_957788172_gb_LMYF01000008_1_Hypsibius_dujardini_scaffold8	271356	272138	783	Inner membrane protein	- none -	271356	272138
fig|6666666.161614.peg.259	CDS	gi_957788172_gb_LMYF01000008_1_Hypsibius_dujardini_scaffold8	272612	272202	411	hypothetical protein	- none -	272202	272612
fig|6666666.161614.peg.260	CDS	gi_957788172_gb_LMYF01000008_1_Hypsibius_dujardini_scaffold8	273685	272624	1062	B. burgdorferi predicted coding region BB0756	- none -	272624	273685
fig|6666666.161614.peg.261	CDS	gi_957788172_gb_LMYF01000008_1_Hypsibius_dujardini_scaffold8	274368	273709	660	hypothetical protein	- none -	273709	274368
fig|6666666.161614.peg.262	CDS	gi_957788172_gb_LMYF01000008_1_Hypsibius_dujardini_scaffold8	280600	274427	6174	FIG00652507: hypothetical protein	- none -	274427	280600
fig|6666666.161614.peg.263	CDS	gi_957788172_gb_LMYF01000008_1_Hypsibius_dujardini_scaffold8	280779	280666	114	hypothetical protein	- none -	280666	280779
fig|6666666.161614.peg.264	CDS	gi_957788172_gb_LMYF01000008_1_Hypsibius_dujardini_scaffold8	280898	281011	114	hypothetical protein	- none -	280898	281011
fig|6666666.161614.peg.265	CDS	gi_957788172_gb_LMYF01000008_1_Hypsibius_dujardini_scaffold8	281017	281745	729	hypothetical protein	- none -	281017	281745
fig|6666666.161614.peg.266	CDS	gi_957788172_gb_LMYF01000008_1_Hypsibius_dujardini_scaffold8	282713	281838	876	Succinyl-CoA ligase [ADP-forming] alpha chain (EC 6.2.1.5)	Serine-glyoxylate cycle, TCA Cycle	281838	282713
fig|6666666.161614.peg.267	CDS	gi_957788172_gb_LMYF01000008_1_Hypsibius_dujardini_scaffold8	283181	282765	417	hypothetical protein	- none -	282765	283181
fig|6666666.161614.peg.268	CDS	gi_957788172_gb_LMYF01000008_1_Hypsibius_dujardini_scaffold8	284076	283267	810	Methionine ABC transporter ATP-binding protein	Methionine Biosynthesis, Methionine Degradation	283267	284076
fig|6666666.161614.peg.269	CDS	gi_957788172_gb_LMYF01000008_1_Hypsibius_dujardini_scaffold8	284844	284107	738	ABC-type transport system involved in resistance to organic solvents, permease component	- none -	284107	284844
fig|6666666.161614.peg.270	CDS	gi_957788172_gb_LMYF01000008_1_Hypsibius_dujardini_scaffold8	287270	284925	2346	NADP-dependent malic enzyme (EC 1.1.1.40)	Pyruvate metabolism I: anaplerotic reactions, PEP	284925	287270
fig|6666666.161614.peg.271	CDS	gi_957788172_gb_LMYF01000008_1_Hypsibius_dujardini_scaffold8	287814	287404	411	hypothetical protein	- none -	287404	287814
fig|6666666.161614.peg.272	CDS	gi_957788172_gb_LMYF01000008_1_Hypsibius_dujardini_scaffold8	289049	287868	1182	N-acetyl-L,L-diaminopimelate deacetylase (EC 3.5.1.47)	Lysine Biosynthesis DAP Pathway, GJO scratch	287868	289049
fig|6666666.161614.peg.273	CDS	gi_957788172_gb_LMYF01000008_1_Hypsibius_dujardini_scaffold8	289633	289160	474	hypothetical protein	- none -	289160	289633
fig|6666666.161614.peg.274	CDS	gi_957788172_gb_LMYF01000008_1_Hypsibius_dujardini_scaffold8	290606	289656	951	Aldehyde dehydrogenase (EC 1.2.1.3)	Glycerolipid and Glycerophospholipid Metabolism in Bacteria, Methylglyoxal Metabolism, Methylglyoxal Metabolism, Pyruvate metabolism II: acetyl-CoA, acetogenesis from pyruvate	289656	290606
fig|6666666.161614.peg.275	CDS	gi_957788172_gb_LMYF01000008_1_Hypsibius_dujardini_scaffold8	292129	290627	1503	Aldehyde dehydrogenase (EC 1.2.1.3)	Glycerolipid and Glycerophospholipid Metabolism in Bacteria, Methylglyoxal Metabolism, Methylglyoxal Metabolism, Pyruvate metabolism II: acetyl-CoA, acetogenesis from pyruvate	290627	292129
fig|6666666.161614.peg.276	CDS	gi_957788172_gb_LMYF01000008_1_Hypsibius_dujardini_scaffold8	293287	292367	921	Deoxyribose-phosphate aldolase (EC 4.1.2.4)	Deoxyribose and Deoxynucleoside Catabolism	292367	293287
fig|6666666.161614.peg.277	CDS	gi_957788172_gb_LMYF01000008_1_Hypsibius_dujardini_scaffold8	293479	296664	3186	Secreted enzyme, contains two amidohydrolase related domains	- none -	293479	296664
fig|6666666.161614.peg.278	CDS	gi_957788172_gb_LMYF01000008_1_Hypsibius_dujardini_scaffold8	296676	298010	1335	Predicted amidohydrolase	- none -	296676	298010
fig|6666666.161614.peg.279	CDS	gi_957788172_gb_LMYF01000008_1_Hypsibius_dujardini_scaffold8	299693	298089	1605	hypothetical protein	- none -	298089	299693
fig|6666666.161614.peg.280	CDS	gi_957788172_gb_LMYF01000008_1_Hypsibius_dujardini_scaffold8	303243	299911	3333	Protein export cytoplasm protein SecA ATPase RNA helicase (TC 3.A.5.1.1)	- none -	299911	303243
fig|6666666.161614.peg.281	CDS	gi_957788172_gb_LMYF01000008_1_Hypsibius_dujardini_scaffold8	303470	304168	699	hypothetical protein	- none -	303470	304168
fig|6666666.161614.peg.282	CDS	gi_957788172_gb_LMYF01000008_1_Hypsibius_dujardini_scaffold8	304321	305202	882	ATP synthase gamma chain (EC 3.6.3.14)	- none -	304321	305202
fig|6666666.161614.peg.283	CDS	gi_957788172_gb_LMYF01000008_1_Hypsibius_dujardini_scaffold8	305300	306019	720	Segregation and condensation protein B	CBSS-314276.3.peg.1499	305300	306019
fig|6666666.161614.peg.284	CDS	gi_957788172_gb_LMYF01000008_1_Hypsibius_dujardini_scaffold8	306091	307305	1215	Diaminopimelate decarboxylase (EC 4.1.1.20)	Lysine Biosynthesis DAP Pathway, GJO scratch	306091	307305
fig|6666666.161614.peg.285	CDS	gi_957788172_gb_LMYF01000008_1_Hypsibius_dujardini_scaffold8	308185	307307	879	hypothetical protein	- none -	307307	308185
fig|6666666.161614.peg.286	CDS	gi_957788172_gb_LMYF01000008_1_Hypsibius_dujardini_scaffold8	308342	309928	1587	Cysteine protease	- none -	308342	309928
fig|6666666.161614.peg.287	CDS	gi_957788172_gb_LMYF01000008_1_Hypsibius_dujardini_scaffold8	309941	310432	492	hypothetical protein	- none -	309941	310432
fig|6666666.161614.peg.288	CDS	gi_957788172_gb_LMYF01000008_1_Hypsibius_dujardini_scaffold8	310429	311832	1404	Metallo-beta-lactamase family protein, RNA-specific	Ribonucleases in Bacillus	310429	311832
fig|6666666.161614.peg.289	CDS	gi_957788172_gb_LMYF01000008_1_Hypsibius_dujardini_scaffold8	311939	312529	591	lipoprotein, putative	- none -	311939	312529
fig|6666666.161614.peg.290	CDS	gi_957788172_gb_LMYF01000008_1_Hypsibius_dujardini_scaffold8	313615	312920	696	Two-component system response regulator protein	- none -	312920	313615
fig|6666666.161614.peg.291	CDS	gi_957788172_gb_LMYF01000008_1_Hypsibius_dujardini_scaffold8	314013	313612	402	hypothetical protein	- none -	313612	314013
fig|6666666.161614.peg.292	CDS	gi_957788172_gb_LMYF01000008_1_Hypsibius_dujardini_scaffold8	314116	316242	2127	Sensory box histidine kinase/response regulator	- none -	314116	316242
fig|6666666.161614.peg.293	CDS	gi_957788172_gb_LMYF01000008_1_Hypsibius_dujardini_scaffold8	316370	316489	120	hypothetical protein	- none -	316370	316489
fig|6666666.161614.peg.294	CDS	gi_957788172_gb_LMYF01000008_1_Hypsibius_dujardini_scaffold8	316846	317103	258	hypothetical protein	- none -	316846	317103
fig|6666666.161614.peg.295	CDS	gi_957788172_gb_LMYF01000008_1_Hypsibius_dujardini_scaffold8	317107	317970	864	Gll2498 protein	- none -	317107	317970
fig|6666666.161614.peg.296	CDS	gi_957788172_gb_LMYF01000008_1_Hypsibius_dujardini_scaffold8	318495	317962	534	hypothetical protein	- none -	317962	318495
fig|6666666.161614.peg.297	CDS	gi_957788172_gb_LMYF01000008_1_Hypsibius_dujardini_scaffold8	319110	318499	612	hypothetical protein	- none -	318499	319110
fig|6666666.161614.peg.298	CDS	gi_957788172_gb_LMYF01000008_1_Hypsibius_dujardini_scaffold8	320167	319592	576	hypothetical protein	- none -	319592	320167
fig|6666666.161614.peg.299	CDS	gi_957788172_gb_LMYF01000008_1_Hypsibius_dujardini_scaffold8	320945	320175	771	BH2933 unknown	- none -	320175	320945
fig|6666666.161614.peg.300	CDS	gi_957788172_gb_LMYF01000008_1_Hypsibius_dujardini_scaffold8	322557	320962	1596	Cupin 4	- none -	320962	322557
fig|6666666.161614.peg.301	CDS	gi_957788172_gb_LMYF01000008_1_Hypsibius_dujardini_scaffold8	323761	322610	1152	DNA polymerase IV (EC 2.7.7.7)	DNA repair, bacterial	322610	323761
fig|6666666.161614.peg.302	CDS	gi_957788172_gb_LMYF01000008_1_Hypsibius_dujardini_scaffold8	326695	323798	2898	DNA polymerase III alpha subunit (EC 2.7.7.7)	- none -	323798	326695
fig|6666666.161614.peg.303	CDS	gi_957788172_gb_LMYF01000008_1_Hypsibius_dujardini_scaffold8	326843	327868	1026	hypothetical protein	- none -	326843	327868
fig|6666666.161614.peg.304	CDS	gi_957788172_gb_LMYF01000008_1_Hypsibius_dujardini_scaffold8	328476	332870	4395	hypothetical protein	- none -	328476	332870
fig|6666666.161614.peg.305	CDS	gi_957788172_gb_LMYF01000008_1_Hypsibius_dujardini_scaffold8	333500	333255	246	hypothetical protein	- none -	333255	333500
fig|6666666.161614.peg.306	CDS	gi_957788172_gb_LMYF01000008_1_Hypsibius_dujardini_scaffold8	333653	333534	120	hypothetical protein	- none -	333534	333653
fig|6666666.161614.peg.307	CDS	gi_957788172_gb_LMYF01000008_1_Hypsibius_dujardini_scaffold8	334019	335359	1341	hypothetical protein	- none -	334019	335359
fig|6666666.161614.peg.308	CDS	gi_957788172_gb_LMYF01000008_1_Hypsibius_dujardini_scaffold8	335372	338308	2937	hypothetical protein	- none -	335372	338308
fig|6666666.161614.peg.309	CDS	gi_957788172_gb_LMYF01000008_1_Hypsibius_dujardini_scaffold8	338326	338451	126	hypothetical protein	- none -	338326	338451
fig|6666666.161614.peg.310	CDS	gi_957788172_gb_LMYF01000008_1_Hypsibius_dujardini_scaffold8	338585	343390	4806	ATP-dependent DNA helicase RecQ	DNA repair, bacterial RecFOR pathway	338585	343390
fig|6666666.161614.peg.311	CDS	gi_957788172_gb_LMYF01000008_1_Hypsibius_dujardini_scaffold8	343758	345071	1314	hypothetical protein	- none -	343758	345071
fig|6666666.161614.peg.312	CDS	gi_957788172_gb_LMYF01000008_1_Hypsibius_dujardini_scaffold8	345160	347232	2073	Type I restriction-modification system, DNA-methyltransferase subunit M (EC 2.1.1.72)	Restriction-Modification System, Type I Restriction-Modification	345160	347232
fig|6666666.161614.peg.313	CDS	gi_957788172_gb_LMYF01000008_1_Hypsibius_dujardini_scaffold8	347229	348443	1215	Type I restriction-modification system, specificity subunit S (EC 3.1.21.3)	Restriction-Modification System, Type I Restriction-Modification	347229	348443
fig|6666666.161614.peg.314	CDS	gi_957788172_gb_LMYF01000008_1_Hypsibius_dujardini_scaffold8	348557	350914	2358	hypothetical protein	- none -	348557	350914
fig|6666666.161614.peg.315	CDS	gi_957788172_gb_LMYF01000008_1_Hypsibius_dujardini_scaffold8	351036	351260	225	hypothetical protein	- none -	351036	351260
fig|6666666.161614.peg.316	CDS	gi_957788172_gb_LMYF01000008_1_Hypsibius_dujardini_scaffold8	351264	352538	1275	hypothetical protein	- none -	351264	352538
fig|6666666.161614.peg.317	CDS	gi_957788172_gb_LMYF01000008_1_Hypsibius_dujardini_scaffold8	352542	355763	3222	Type I restriction-modification system, restriction subunit R (EC 3.1.21.3)	Restriction-Modification System, Type I Restriction-Modification	352542	355763
fig|6666666.161614.peg.318	CDS	gi_957788172_gb_LMYF01000008_1_Hypsibius_dujardini_scaffold8	356102	356338	237	transcriptional regulator, XRE family	- none -	356102	356338
fig|6666666.161614.peg.319	CDS	gi_957788172_gb_LMYF01000008_1_Hypsibius_dujardini_scaffold8	356346	356645	300	hypothetical protein	- none -	356346	356645
fig|6666666.161614.peg.320	CDS	gi_957788172_gb_LMYF01000008_1_Hypsibius_dujardini_scaffold8	356654	357604	951	HipA protein	Persister Cells	356654	357604
fig|6666666.161614.peg.321	CDS	gi_957788172_gb_LMYF01000008_1_Hypsibius_dujardini_scaffold8	358007	358147	141	hypothetical protein	- none -	358007	358147
fig|6666666.161614.peg.322	CDS	gi_957788172_gb_LMYF01000008_1_Hypsibius_dujardini_scaffold8	358474	359907	1434	hypothetical protein	- none -	358474	359907
fig|6666666.161614.peg.323	CDS	gi_957788172_gb_LMYF01000008_1_Hypsibius_dujardini_scaffold8	359919	363491	3573	conserved hypothetical protein	- none -	359919	363491
fig|6666666.161614.peg.324	CDS	gi_957788172_gb_LMYF01000008_1_Hypsibius_dujardini_scaffold8	364512	368963	4452	hypothetical protein	- none -	364512	368963
fig|6666666.161614.peg.325	CDS	gi_957788172_gb_LMYF01000008_1_Hypsibius_dujardini_scaffold8	368976	370358	1383	interphotoreceptor retinoid-binding protein	- none -	368976	370358
fig|6666666.161614.peg.326	CDS	gi_957788172_gb_LMYF01000008_1_Hypsibius_dujardini_scaffold8	370577	371065	489	hypothetical protein	- none -	370577	371065
fig|6666666.161614.peg.327	CDS	gi_957788172_gb_LMYF01000008_1_Hypsibius_dujardini_scaffold8	371073	373817	2745	CHU large protein; uncharacterized	- none -	371073	373817
fig|6666666.161614.peg.328	CDS	gi_957788172_gb_LMYF01000008_1_Hypsibius_dujardini_scaffold8	374591	373965	627	hypothetical protein	- none -	373965	374591
fig|6666666.161614.peg.329	CDS	gi_957788172_gb_LMYF01000008_1_Hypsibius_dujardini_scaffold8	376211	375405	807	hypothetical protein	- none -	375405	376211
fig|6666666.161614.peg.330	CDS	gi_957788172_gb_LMYF01000008_1_Hypsibius_dujardini_scaffold8	377461	376214	1248	Integrase	- none -	376214	377461
fig|6666666.161614.rna.3	RNA	gi_957788172_gb_LMYF01000008_1_Hypsibius_dujardini_scaffold8	377697	377626	72	tRNA-Glu-TTC	- none -	377626	377697
fig|6666666.161614.peg.331	CDS	gi_957788172_gb_LMYF01000008_1_Hypsibius_dujardini_scaffold8	377919	378932	1014	NAD-dependent glyceraldehyde-3-phosphate dehydrogenase (EC 1.2.1.12)	Entner-Doudoroff Pathway, Glycolysis and Gluconeogenesis, Pyridoxin (Vitamin B6) Biosynthesis	377919	378932
fig|6666666.161614.peg.332	CDS	gi_957788172_gb_LMYF01000008_1_Hypsibius_dujardini_scaffold8	379006	379368	363	hypothetical protein	- none -	379006	379368
fig|6666666.161614.peg.333	CDS	gi_957788172_gb_LMYF01000008_1_Hypsibius_dujardini_scaffold8	379392	380591	1200	Phosphoglycerate kinase (EC 2.7.2.3)	Entner-Doudoroff Pathway, Glycolysis and Gluconeogenesis	379392	380591
fig|6666666.161614.peg.334	CDS	gi_957788172_gb_LMYF01000008_1_Hypsibius_dujardini_scaffold8	380638	381285	648	hypothetical protein	- none -	380638	381285
fig|6666666.161614.peg.335	CDS	gi_957788172_gb_LMYF01000008_1_Hypsibius_dujardini_scaffold8	382409	381294	1116	FIG00908601: hypothetical protein	- none -	381294	382409
fig|6666666.161614.peg.336	CDS	gi_957788172_gb_LMYF01000008_1_Hypsibius_dujardini_scaffold8	382421	383149	729	LemA family protein	- none -	382421	383149
fig|6666666.161614.peg.337	CDS	gi_957788172_gb_LMYF01000008_1_Hypsibius_dujardini_scaffold8	383160	383753	594	LemA family protein	- none -	383160	383753
fig|6666666.161614.peg.338	CDS	gi_957788172_gb_LMYF01000008_1_Hypsibius_dujardini_scaffold8	383764	384222	459	FIG014338: Hypothetical protein	- none -	383764	384222
fig|6666666.161614.peg.339	CDS	gi_957788172_gb_LMYF01000008_1_Hypsibius_dujardini_scaffold8	384229	384969	741	Beta-propeller domains of methanol dehydrogenase type	- none -	384229	384969
fig|6666666.161614.peg.340	CDS	gi_957788172_gb_LMYF01000008_1_Hypsibius_dujardini_scaffold8	387562	385040	2523	Aminopeptidase	- none -	385040	387562
fig|6666666.161614.peg.341	CDS	gi_957788172_gb_LMYF01000008_1_Hypsibius_dujardini_scaffold8	387717	389117	1401	ZK84.1	- none -	387717	389117
fig|6666666.161614.peg.342	CDS	gi_957788172_gb_LMYF01000008_1_Hypsibius_dujardini_scaffold8	389123	389863	741	tRNA pseudouridine synthase A (EC 4.2.1.70)	RNA pseudouridine syntheses, tRNA processing	389123	389863
fig|6666666.161614.peg.343	CDS	gi_957788172_gb_LMYF01000008_1_Hypsibius_dujardini_scaffold8	390393	390196	198	hypothetical protein	- none -	390196	390393
fig|6666666.161614.rna.4	RNA	gi_957788172_gb_LMYF01000008_1_Hypsibius_dujardini_scaffold8	390556	392023	1468	Small Subunit Ribosomal RNA; ssuRNA; SSU rRNA	- none -	390556	392023
fig|6666666.161614.rna.5	RNA	gi_957788172_gb_LMYF01000008_1_Hypsibius_dujardini_scaffold8	392137	392211	75	tRNA-Ile-GAT	- none -	392137	392211
fig|6666666.161614.rna.6	RNA	gi_957788172_gb_LMYF01000008_1_Hypsibius_dujardini_scaffold8	392224	392297	74	tRNA-Ala-TGC	- none -	392224	392297
fig|6666666.161614.rna.7	RNA	gi_957788172_gb_LMYF01000008_1_Hypsibius_dujardini_scaffold8	392534	395365	2832	Large Subunit Ribosomal RNA; lsuRNA; LSU rRNA	- none -	392534	395365
fig|6666666.161614.rna.8	RNA	gi_957788172_gb_LMYF01000008_1_Hypsibius_dujardini_scaffold8	395447	395560	114	5S RNA	- none -	395447	395560
fig|6666666.161614.peg.344	CDS	gi_957788172_gb_LMYF01000008_1_Hypsibius_dujardini_scaffold8	395707	396855	1149	bll0718; putative transporter	- none -	395707	396855
fig|6666666.161614.peg.345	CDS	gi_957788172_gb_LMYF01000008_1_Hypsibius_dujardini_scaffold8	398585	396858	1728	Gll2474 protein	- none -	396858	398585
fig|6666666.161614.peg.346	CDS	gi_957788172_gb_LMYF01000008_1_Hypsibius_dujardini_scaffold8	398950	398690	261	SSU ribosomal protein S20p	Ribosome SSU bacterial	398690	398950
fig|6666666.161614.peg.347	CDS	gi_957788172_gb_LMYF01000008_1_Hypsibius_dujardini_scaffold8	399144	401951	2808	2-oxoglutarate dehydrogenase E1 component (EC 1.2.4.2)	Dehydrogenase complexes, TCA Cycle	399144	401951
fig|6666666.161614.peg.348	CDS	gi_957788172_gb_LMYF01000008_1_Hypsibius_dujardini_scaffold8	402159	403388	1230	Dihydrolipoamide succinyltransferase component (E2) of 2-oxoglutarate dehydrogenase complex (EC 2.3.1.61)	Dehydrogenase complexes, TCA Cycle	402159	403388
fig|6666666.161614.peg.349	CDS	gi_957788172_gb_LMYF01000008_1_Hypsibius_dujardini_scaffold8	403449	404624	1176	hypothetical protein	- none -	403449	404624
fig|6666666.161614.peg.350	CDS	gi_957788172_gb_LMYF01000008_1_Hypsibius_dujardini_scaffold8	406634	404619	2016	Subtilisin-like serine proteases	- none -	404619	406634
fig|6666666.161614.peg.351	CDS	gi_957788172_gb_LMYF01000008_1_Hypsibius_dujardini_scaffold8	407455	406682	774	hypothetical protein	- none -	406682	407455
fig|6666666.161614.peg.352	CDS	gi_957788172_gb_LMYF01000008_1_Hypsibius_dujardini_scaffold8	408728	407610	1119	tRNA-specific 2-thiouridylase MnmA	RNA methylation	407610	408728
fig|6666666.161614.peg.353	CDS	gi_957788172_gb_LMYF01000008_1_Hypsibius_dujardini_scaffold8	409759	408824	936	Hydrogen peroxide-inducible genes activator	LysR-family proteins in Escherichia coli, LysR-family proteins in Salmonella enterica Typhimurium, Oxidative stress, Thioredoxin-disulfide reductase	408824	409759
fig|6666666.161614.peg.354	CDS	gi_957788172_gb_LMYF01000008_1_Hypsibius_dujardini_scaffold8	409869	412163	2295	Catalase (EC 1.11.1.6) / Peroxidase (EC 1.11.1.7)	Oxidative stress, Oxidative stress, Protection from Reactive Oxygen Species, Protection from Reactive Oxygen Species	409869	412163
fig|6666666.161614.peg.355	CDS	gi_957788172_gb_LMYF01000008_1_Hypsibius_dujardini_scaffold8	412705	412235	471	Probable glutathione S-transferase-related transmembrane protein (EC 2.5.1.18)	- none -	412235	412705
fig|6666666.161614.peg.356	CDS	gi_957788172_gb_LMYF01000008_1_Hypsibius_dujardini_scaffold8	413120	412716	405	hypothetical protein	- none -	412716	413120
fig|6666666.161614.peg.357	CDS	gi_957788172_gb_LMYF01000008_1_Hypsibius_dujardini_scaffold8	413789	413169	621	hypothetical protein	- none -	413169	413789
fig|6666666.161614.peg.358	CDS	gi_957788172_gb_LMYF01000008_1_Hypsibius_dujardini_scaffold8	413948	416509	2562	Secreted protein containing N-terminal Zinc-dependent carboxypeptidase related domain	- none -	413948	416509
fig|6666666.161614.peg.359	CDS	gi_957788172_gb_LMYF01000008_1_Hypsibius_dujardini_scaffold8	416623	417054	432	Single-stranded DNA-binding protein	DNA repair, bacterial, DNA repair, bacterial RecFOR pathway	416623	417054
fig|6666666.161614.peg.360	CDS	gi_957788172_gb_LMYF01000008_1_Hypsibius_dujardini_scaffold8	417136	419052	1917	FIG01094257: hypothetical protein	- none -	417136	419052
fig|6666666.161614.peg.361	CDS	gi_957788172_gb_LMYF01000008_1_Hypsibius_dujardini_scaffold8	419079	419894	816	hypothetical protein	- none -	419079	419894
fig|6666666.161614.peg.362	CDS	gi_957788172_gb_LMYF01000008_1_Hypsibius_dujardini_scaffold8	419936	421333	1398	Myo-inositol 2-dehydrogenase (EC 1.1.1.18)	- none -	419936	421333
fig|6666666.161614.peg.363	CDS	gi_957788172_gb_LMYF01000008_1_Hypsibius_dujardini_scaffold8	421410	422489	1080	Putative malate dehydrogenase (EC 1.1.1.37), similar to archaeal MJ1425	Serine-glyoxylate cycle, TCA Cycle	421410	422489
fig|6666666.161614.peg.364	CDS	gi_957788172_gb_LMYF01000008_1_Hypsibius_dujardini_scaffold8	422640	423953	1314	Aspartokinase (EC 2.7.2.4)	CBSS-216591.1.peg.168, Lysine Biosynthesis DAP Pathway, GJO scratch, Threonine and Homoserine Biosynthesis	422640	423953
fig|6666666.161614.peg.365	CDS	gi_957788172_gb_LMYF01000008_1_Hypsibius_dujardini_scaffold8	424069	425271	1203	hypothetical protein	- none -	424069	425271
fig|6666666.161614.peg.366	CDS	gi_957788172_gb_LMYF01000008_1_Hypsibius_dujardini_scaffold8	425743	425273	471	hypothetical protein	- none -	425273	425743
fig|6666666.161614.peg.367	CDS	gi_957788172_gb_LMYF01000008_1_Hypsibius_dujardini_scaffold8	426912	425863	1050	S-adenosylmethionine:tRNA ribosyltransferase-isomerase (EC 5.-.-.-)	CBSS-211586.1.peg.2832, Queuosine-Archaeosine Biosynthesis	425863	426912
fig|6666666.161614.peg.368	CDS	gi_957788172_gb_LMYF01000008_1_Hypsibius_dujardini_scaffold8	427074	426937	138	hypothetical protein	- none -	426937	427074
fig|6666666.161614.peg.369	CDS	gi_957788172_gb_LMYF01000008_1_Hypsibius_dujardini_scaffold8	427242	431093	3852	hypothetical protein	- none -	427242	431093
fig|6666666.161614.peg.370	CDS	gi_957788172_gb_LMYF01000008_1_Hypsibius_dujardini_scaffold8	432812	431094	1719	Oligopeptide transport ATP-binding protein OppF (TC 3.A.1.5.1)	ABC transporter oligopeptide (TC 3.A.1.5.1)	431094	432812
fig|6666666.161614.peg.371	CDS	gi_957788172_gb_LMYF01000008_1_Hypsibius_dujardini_scaffold8	433186	432812	375	hypothetical protein	- none -	432812	433186
fig|6666666.161614.peg.372	CDS	gi_957788172_gb_LMYF01000008_1_Hypsibius_dujardini_scaffold8	433969	433199	771	AMP nucleosidase (EC 3.2.2.4)	Purine conversions	433199	433969
fig|6666666.161614.peg.373	CDS	gi_957788172_gb_LMYF01000008_1_Hypsibius_dujardini_scaffold8	434018	434458	441	hypothetical protein	- none -	434018	434458
fig|6666666.161614.peg.374	CDS	gi_957788172_gb_LMYF01000008_1_Hypsibius_dujardini_scaffold8	434881	434462	420	hypothetical protein	- none -	434462	434881
fig|6666666.161614.peg.375	CDS	gi_957788172_gb_LMYF01000008_1_Hypsibius_dujardini_scaffold8	435534	434893	642	DNA-binding response regulator, LuxR family	- none -	434893	435534
fig|6666666.161614.peg.376	CDS	gi_957788172_gb_LMYF01000008_1_Hypsibius_dujardini_scaffold8	437545	435599	1947	Sensory box histidine kinase	- none -	435599	437545
fig|6666666.161614.peg.377	CDS	gi_957788172_gb_LMYF01000008_1_Hypsibius_dujardini_scaffold8	439606	437561	2046	hypothetical protein	- none -	437561	439606
fig|6666666.161614.peg.378	CDS	gi_957788172_gb_LMYF01000008_1_Hypsibius_dujardini_scaffold8	440350	439634	717	Dihydrodipicolinate reductase (EC 1.3.1.26)	- none -	439634	440350
fig|6666666.161614.peg.379	CDS	gi_957788172_gb_LMYF01000008_1_Hypsibius_dujardini_scaffold8	441097	440435	663	hypothetical protein	- none -	440435	441097
fig|6666666.161614.peg.380	CDS	gi_957788172_gb_LMYF01000008_1_Hypsibius_dujardini_scaffold8	442042	441125	918	Chromosome (plasmid) partitioning protein ParB / Stage 0 sporulation protein J	Bacterial Cytoskeleton, Bacterial Cytoskeleton, Cell Division Subsystem including YidCD, RNA modification and chromosome partitioning cluster	441125	442042
fig|6666666.161614.peg.381	CDS	gi_957788172_gb_LMYF01000008_1_Hypsibius_dujardini_scaffold8	442889	442086	804	Chromosome (plasmid) partitioning protein ParA / Sporulation initiation inhibitor protein Soj	Bacterial Cell Division, Bacterial Cytoskeleton, Bacterial Cytoskeleton, Cell Division Subsystem including YidCD, RNA modification and chromosome partitioning cluster	442086	442889
fig|6666666.161614.peg.382	CDS	gi_957788172_gb_LMYF01000008_1_Hypsibius_dujardini_scaffold8	443048	444298	1251	putative phosphoesterase	- none -	443048	444298
fig|6666666.161614.peg.383	CDS	gi_957788172_gb_LMYF01000008_1_Hypsibius_dujardini_scaffold8	444423	445475	1053	hypothetical protein	- none -	444423	445475
fig|6666666.161614.peg.384	CDS	gi_957788172_gb_LMYF01000008_1_Hypsibius_dujardini_scaffold8	445768	446301	534	hypothetical protein	- none -	445768	446301
fig|6666666.161614.peg.385	CDS	gi_957788172_gb_LMYF01000008_1_Hypsibius_dujardini_scaffold8	446504	448909	2406	ATP-dependent protease La (EC 3.4.21.53) Type I	Proteolysis in bacteria, ATP-dependent	446504	448909
fig|6666666.161614.peg.386	CDS	gi_957788172_gb_LMYF01000008_1_Hypsibius_dujardini_scaffold8	449127	450128	1002	low affinity penicillin binding protein	- none -	449127	450128
fig|6666666.161614.peg.387	CDS	gi_957788172_gb_LMYF01000008_1_Hypsibius_dujardini_scaffold8	451122	450142	981	Biotin synthase (EC 2.8.1.6)	Biotin biosynthesis, Biotin biosynthesis Experimental, Biotin synthesis cluster	450142	451122
fig|6666666.161614.peg.388	CDS	gi_957788172_gb_LMYF01000008_1_Hypsibius_dujardini_scaffold8	452644	451139	1506	NADH-ubiquinone oxidoreductase chain 6 (EC 1.6.5.3) (NADH dehydrogenase subunit 6)	- none -	451139	452644
fig|6666666.161614.peg.389	CDS	gi_957788172_gb_LMYF01000008_1_Hypsibius_dujardini_scaffold8	454077	452674	1404	NADH-ubiquinone oxidoreductase chain 6 (EC 1.6.5.3) (NADH dehydrogenase subunit 6)	- none -	452674	454077
fig|6666666.161614.peg.390	CDS	gi_957788172_gb_LMYF01000008_1_Hypsibius_dujardini_scaffold8	454084	454212	129	hypothetical protein	- none -	454084	454212
fig|6666666.161614.peg.391	CDS	gi_957788172_gb_LMYF01000008_1_Hypsibius_dujardini_scaffold8	454267	455571	1305	Phosphoenolpyruvate phosphomutase (EC 5.4.2.9)	Phosphoenolpyruvate phosphomutase	454267	455571
fig|6666666.161614.peg.392	CDS	gi_957788172_gb_LMYF01000008_1_Hypsibius_dujardini_scaffold8	455568	456695	1128	Phosphonopyruvate decarboxylase (EC 4.1.1.82)	Phosphoenolpyruvate phosphomutase	455568	456695
fig|6666666.161614.peg.393	CDS	gi_957788172_gb_LMYF01000008_1_Hypsibius_dujardini_scaffold8	456706	457731	1026	Alcohol dehydrogenase (EC 1.1.1.1)	5-FCL-like protein, Butanol Biosynthesis, Glycerolipid and Glycerophospholipid Metabolism in Bacteria	456706	457731
fig|6666666.161614.peg.394	CDS	gi_957788172_gb_LMYF01000008_1_Hypsibius_dujardini_scaffold8	457735	458841	1107	putative bifunctional polymerase	- none -	457735	458841
fig|6666666.161614.peg.395	CDS	gi_957788172_gb_LMYF01000008_1_Hypsibius_dujardini_scaffold8	459022	458843	180	hypothetical protein	- none -	458843	459022
fig|6666666.161614.peg.396	CDS	gi_957788172_gb_LMYF01000008_1_Hypsibius_dujardini_scaffold8	460125	459022	1104	Endoglucanase	- none -	459022	460125
fig|6666666.161614.peg.397	CDS	gi_957788172_gb_LMYF01000008_1_Hypsibius_dujardini_scaffold8	460993	460154	840	hypothetical protein	- none -	460154	460993
fig|6666666.161614.peg.398	CDS	gi_957788172_gb_LMYF01000008_1_Hypsibius_dujardini_scaffold8	461460	460999	462	hypothetical protein	- none -	460999	461460
fig|6666666.161614.peg.399	CDS	gi_957788172_gb_LMYF01000008_1_Hypsibius_dujardini_scaffold8	461512	462507	996	Possible acyl protein synthase/acyl-CoA reductase-like protein	- none -	461512	462507
fig|6666666.161614.peg.400	CDS	gi_957788172_gb_LMYF01000008_1_Hypsibius_dujardini_scaffold8	463339	462581	759	Two-component system response regulator	- none -	462581	463339
fig|6666666.161614.peg.401	CDS	gi_957788172_gb_LMYF01000008_1_Hypsibius_dujardini_scaffold8	464363	463356	1008	putative two-component system sensor protein histidine kinase	- none -	463356	464363
fig|6666666.161614.peg.402	CDS	gi_957788172_gb_LMYF01000008_1_Hypsibius_dujardini_scaffold8	464670	464798	129	hypothetical protein	- none -	464670	464798
fig|6666666.161614.peg.403	CDS	gi_957788172_gb_LMYF01000008_1_Hypsibius_dujardini_scaffold8	464857	467802	2946	TonB-dependent receptor	Ton and Tol transport systems	464857	467802
fig|6666666.161614.peg.404	CDS	gi_957788172_gb_LMYF01000008_1_Hypsibius_dujardini_scaffold8	467825	469231	1407	putative outer membrane protein, probably involved in nutrient binding	- none -	467825	469231
fig|6666666.161614.peg.405	CDS	gi_957788172_gb_LMYF01000008_1_Hypsibius_dujardini_scaffold8	469402	472539	3138	TonB-dependent receptor	Ton and Tol transport systems	469402	472539
fig|6666666.161614.peg.406	CDS	gi_957788172_gb_LMYF01000008_1_Hypsibius_dujardini_scaffold8	472553	474004	1452	hypothetical protein	- none -	472553	474004
fig|6666666.161614.peg.407	CDS	gi_957788172_gb_LMYF01000008_1_Hypsibius_dujardini_scaffold8	473994	474467	474	hypothetical protein	- none -	473994	474467
fig|6666666.161614.peg.408	CDS	gi_957788172_gb_LMYF01000008_1_Hypsibius_dujardini_scaffold8	474729	477677	2949	TonB-dependent receptor	Ton and Tol transport systems	474729	477677
fig|6666666.161614.peg.409	CDS	gi_957788172_gb_LMYF01000008_1_Hypsibius_dujardini_scaffold8	477712	479187	1476	hypothetical protein	- none -	477712	479187
fig|6666666.161614.peg.410	CDS	gi_957788172_gb_LMYF01000008_1_Hypsibius_dujardini_scaffold8	479517	479311	207	hypothetical protein	- none -	479311	479517
fig|6666666.161614.peg.411	CDS	gi_957788172_gb_LMYF01000008_1_Hypsibius_dujardini_scaffold8	480811	479501	1311	High-affinity gluconate transporter GntT	- none -	479501	480811
fig|6666666.161614.peg.412	CDS	gi_957788172_gb_LMYF01000008_1_Hypsibius_dujardini_scaffold8	482012	480837	1176	Endo-1,4-beta-xylanase A precursor (EC 3.2.1.8)	D-Galacturonate and D-Glucuronate Utilization, Xylose utilization	480837	482012
fig|6666666.161614.peg.413	CDS	gi_957788172_gb_LMYF01000008_1_Hypsibius_dujardini_scaffold8	482874	482038	837	Fumarylacetoacetate hydrolase family protein	Gentisate degradation, Pterin carbinolamine dehydratase, Salicylate and gentisate catabolism	482038	482874
fig|6666666.161614.peg.414	CDS	gi_957788172_gb_LMYF01000008_1_Hypsibius_dujardini_scaffold8	483901	482879	1023	Gluconolactonase (EC 3.1.1.17)	Entner-Doudoroff Pathway	482879	483901
fig|6666666.161614.peg.415	CDS	gi_957788172_gb_LMYF01000008_1_Hypsibius_dujardini_scaffold8	485641	483923	1719	L-arabonate dehydratase (EC 4.2.1.25)	L-Arabinose utilization	483923	485641
fig|6666666.161614.peg.416	CDS	gi_957788172_gb_LMYF01000008_1_Hypsibius_dujardini_scaffold8	486850	485717	1134	Myo-inositol 2-dehydrogenase (EC 1.1.1.18)	- none -	485717	486850
fig|6666666.161614.peg.417	CDS	gi_957788172_gb_LMYF01000008_1_Hypsibius_dujardini_scaffold8	487720	486860	861	hypothetical protein	- none -	486860	487720
fig|6666666.161614.peg.418	CDS	gi_957788172_gb_LMYF01000008_1_Hypsibius_dujardini_scaffold8	489144	487792	1353	Endo-1,4-beta-xylanase A precursor (EC 3.2.1.8)	D-Galacturonate and D-Glucuronate Utilization, Xylose utilization	487792	489144
fig|6666666.161614.peg.419	CDS	gi_957788172_gb_LMYF01000008_1_Hypsibius_dujardini_scaffold8	491132	489192	1941	Maltodextrin glucosidase (EC 3.2.1.20)	Maltose and Maltodextrin Utilization	489192	491132
fig|6666666.161614.peg.420	CDS	gi_957788172_gb_LMYF01000008_1_Hypsibius_dujardini_scaffold8	492719	491139	1581	glycoside hydrolase, family 43	- none -	491139	492719
fig|6666666.161614.peg.421	CDS	gi_957788172_gb_LMYF01000008_1_Hypsibius_dujardini_scaffold8	495342	492730	2613	Beta-glucosidase (EC 3.2.1.21)	- none -	492730	495342
fig|6666666.161614.peg.422	CDS	gi_957788172_gb_LMYF01000008_1_Hypsibius_dujardini_scaffold8	497282	495363	1920	Endo-1,4-beta-xylanase A precursor (EC 3.2.1.8)	D-Galacturonate and D-Glucuronate Utilization, Xylose utilization	495363	497282
fig|6666666.161614.peg.423	CDS	gi_957788172_gb_LMYF01000008_1_Hypsibius_dujardini_scaffold8	497430	497308	123	Endo-1,4-beta-xylanase A precursor (EC 3.2.1.8)	D-Galacturonate and D-Glucuronate Utilization, Xylose utilization	497308	497430
fig|6666666.161614.peg.424	CDS	gi_957788172_gb_LMYF01000008_1_Hypsibius_dujardini_scaffold8	498559	497408	1152	Endo-1,4-beta-xylanase A precursor (EC 3.2.1.8)	D-Galacturonate and D-Glucuronate Utilization, Xylose utilization	497408	498559
fig|6666666.161614.peg.425	CDS	gi_957788172_gb_LMYF01000008_1_Hypsibius_dujardini_scaffold8	500199	498652	1548	Alpha-N-arabinofuranosidase 2 (EC 3.2.1.55)	L-Arabinose utilization	498652	500199
fig|6666666.161614.peg.426	CDS	gi_957788172_gb_LMYF01000008_1_Hypsibius_dujardini_scaffold8	502337	500409	1929	Sialic acid-specific 9-O-acetylesterase	- none -	500409	502337
fig|6666666.161614.peg.427	CDS	gi_957788172_gb_LMYF01000008_1_Hypsibius_dujardini_scaffold8	504963	502345	2619	Beta-glucosidase (EC 3.2.1.21)	- none -	502345	504963
fig|6666666.161614.peg.428	CDS	gi_957788172_gb_LMYF01000008_1_Hypsibius_dujardini_scaffold8	506630	504981	1650	Beta-xylosidase (EC 3.2.1.37)	Xylose utilization	504981	506630
fig|6666666.161614.peg.429	CDS	gi_957788172_gb_LMYF01000008_1_Hypsibius_dujardini_scaffold8	507686	506649	1038	Xylosidase/arabinosidase	- none -	506649	507686
fig|6666666.161614.peg.430	CDS	gi_957788172_gb_LMYF01000008_1_Hypsibius_dujardini_scaffold8	509164	507710	1455	Xyloside transporter XynT	Xylose utilization	507710	509164
fig|6666666.161614.peg.431	CDS	gi_957788172_gb_LMYF01000008_1_Hypsibius_dujardini_scaffold8	510329	509187	1143	Endo-1,4-beta-xylanase A precursor (EC 3.2.1.8)	D-Galacturonate and D-Glucuronate Utilization, Xylose utilization	509187	510329
fig|6666666.161614.peg.432	CDS	gi_957788172_gb_LMYF01000008_1_Hypsibius_dujardini_scaffold8	512901	510343	2559	hypothetical protein	- none -	510343	512901
fig|6666666.161614.peg.433	CDS	gi_957788172_gb_LMYF01000008_1_Hypsibius_dujardini_scaffold8	513648	512911	738	3-oxoacyl-[acyl-carrier protein] reductase (EC 1.1.1.100)	Fatty Acid Biosynthesis FASII	512911	513648
fig|6666666.161614.peg.434	CDS	gi_957788172_gb_LMYF01000008_1_Hypsibius_dujardini_scaffold8	515828	513678	2151	Alpha-glucuronidase (EC 3.2.1.139)	D-Galacturonate and D-Glucuronate Utilization	513678	515828
fig|6666666.161614.peg.435	CDS	gi_957788172_gb_LMYF01000008_1_Hypsibius_dujardini_scaffold8	516881	515856	1026	LacI family transcriptional regulator	- none -	515856	516881
fig|6666666.161614.peg.436	CDS	gi_957788172_gb_LMYF01000008_1_Hypsibius_dujardini_scaffold8	517961	516921	1041	LacI family transcriptional regulator	- none -	516921	517961
fig|6666666.161614.peg.437	CDS	gi_957788172_gb_LMYF01000008_1_Hypsibius_dujardini_scaffold8	518381	521452	3072	TonB-dependent receptor	Ton and Tol transport systems	518381	521452
fig|6666666.161614.peg.438	CDS	gi_957788172_gb_LMYF01000008_1_Hypsibius_dujardini_scaffold8	521464	523005	1542	TonB-dependent receptor	Ton and Tol transport systems	521464	523005
fig|6666666.161614.peg.439	CDS	gi_957788172_gb_LMYF01000008_1_Hypsibius_dujardini_scaffold8	523131	523424	294	TonB-dependent receptor	Ton and Tol transport systems	523131	523424
fig|6666666.161614.peg.440	CDS	gi_957788172_gb_LMYF01000008_1_Hypsibius_dujardini_scaffold8	523687	524946	1260	Possible xylan degradation enzyme (glycosyl hydrolase family 30-like domain and Ricin B-like domain)	- none -	523687	524946
fig|6666666.161614.peg.441	CDS	gi_957788172_gb_LMYF01000008_1_Hypsibius_dujardini_scaffold8	525196	525056	141	hypothetical protein	- none -	525056	525196
fig|6666666.161614.peg.442	CDS	gi_957788172_gb_LMYF01000008_1_Hypsibius_dujardini_scaffold8	525207	526649	1443	Xylulose kinase (EC 2.7.1.17)	Xylose utilization	525207	526649
fig|6666666.161614.peg.443	CDS	gi_957788172_gb_LMYF01000008_1_Hypsibius_dujardini_scaffold8	526676	528004	1329	Xylose isomerase (EC 5.3.1.5)	Xylose utilization	526676	528004
fig|6666666.161614.peg.444	CDS	gi_957788172_gb_LMYF01000008_1_Hypsibius_dujardini_scaffold8	528050	529216	1167	Mannonate dehydratase (EC 4.2.1.8)	D-Galacturonate and D-Glucuronate Utilization	528050	529216
fig|6666666.161614.peg.445	CDS	gi_957788172_gb_LMYF01000008_1_Hypsibius_dujardini_scaffold8	529808	529308	501	hypothetical protein	- none -	529308	529808
fig|6666666.161614.rna.9	RNA	gi_957788172_gb_LMYF01000008_1_Hypsibius_dujardini_scaffold8	530096	530015	82	tRNA-Leu-CAG	tRNAs	530015	530096
fig|6666666.161614.peg.446	CDS	gi_957788172_gb_LMYF01000008_1_Hypsibius_dujardini_scaffold8	530946	530140	807	2,3,4,5-tetrahydropyridine-2,6-dicarboxylate N-succinyltransferase (EC 2.3.1.117)	Lysine Biosynthesis DAP Pathway, GJO scratch	530140	530946
fig|6666666.161614.peg.447	CDS	gi_957788172_gb_LMYF01000008_1_Hypsibius_dujardini_scaffold8	531115	532266	1152	Mannosyltransferase (EC 2.4.1.-)	- none -	531115	532266
fig|6666666.161614.peg.448	CDS	gi_957788172_gb_LMYF01000008_1_Hypsibius_dujardini_scaffold8	532260	532829	570	Sua5 YciO YrdC YwlC family protein	- none -	532260	532829
fig|6666666.161614.peg.449	CDS	gi_957788172_gb_LMYF01000008_1_Hypsibius_dujardini_scaffold8	532864	534288	1425	tRNA nucleotidyltransferase (EC 2.7.7.21) (EC 2.7.7.25)	tRNA nucleotidyltransferase	532864	534288
fig|6666666.161614.peg.450	CDS	gi_957788172_gb_LMYF01000008_1_Hypsibius_dujardini_scaffold8	534298	534873	576	hypothetical protein	- none -	534298	534873
fig|6666666.161614.peg.451	CDS	gi_957788172_gb_LMYF01000008_1_Hypsibius_dujardini_scaffold8	534936	535841	906	tRNA delta(2)-isopentenylpyrophosphate transferase (EC 2.5.1.8)	- none -	534936	535841
fig|6666666.161614.peg.452	CDS	gi_957788172_gb_LMYF01000008_1_Hypsibius_dujardini_scaffold8	536639	536004	636	hypothetical protein	- none -	536004	536639
fig|6666666.161614.peg.453	CDS	gi_957788172_gb_LMYF01000008_1_Hypsibius_dujardini_scaffold8	538523	536709	1815	NADH dehydrogenase (EC 1.6.99.3)	Respiratory dehydrogenases 1, Riboflavin synthesis cluster	536709	538523
fig|6666666.161614.peg.454	CDS	gi_957788172_gb_LMYF01000008_1_Hypsibius_dujardini_scaffold8	540965	538581	2385	hypothetical protein	- none -	538581	540965
fig|6666666.161614.peg.455	CDS	gi_957788172_gb_LMYF01000008_1_Hypsibius_dujardini_scaffold8	541108	540962	147	hypothetical protein	- none -	540962	541108
fig|6666666.161614.peg.456	CDS	gi_957788172_gb_LMYF01000008_1_Hypsibius_dujardini_scaffold8	541519	541175	345	hypothetical protein	- none -	541175	541519
fig|6666666.161614.peg.457	CDS	gi_957788172_gb_LMYF01000008_1_Hypsibius_dujardini_scaffold8	543185	541656	1530	putative hemin receptor	- none -	541656	543185
fig|6666666.161614.peg.458	CDS	gi_957788172_gb_LMYF01000008_1_Hypsibius_dujardini_scaffold8	544024	543308	717	hypothetical protein	- none -	543308	544024
fig|6666666.161614.peg.459	CDS	gi_957788172_gb_LMYF01000008_1_Hypsibius_dujardini_scaffold8	544204	545682	1479	Prolyl-tRNA synthetase (EC 6.1.1.15)	- none -	544204	545682
fig|6666666.161614.peg.460	CDS	gi_957788172_gb_LMYF01000008_1_Hypsibius_dujardini_scaffold8	545779	546249	471	hypothetical protein	- none -	545779	546249
fig|6666666.161614.peg.461	CDS	gi_957788172_gb_LMYF01000008_1_Hypsibius_dujardini_scaffold8	547135	546320	816	hypothetical protein	- none -	546320	547135
fig|6666666.161614.peg.462	CDS	gi_957788172_gb_LMYF01000008_1_Hypsibius_dujardini_scaffold8	547248	548216	969	hypothetical protein	- none -	547248	548216
fig|6666666.161614.peg.463	CDS	gi_957788172_gb_LMYF01000008_1_Hypsibius_dujardini_scaffold8	548268	549092	825	hypothetical protein	- none -	548268	549092
fig|6666666.161614.peg.464	CDS	gi_957788172_gb_LMYF01000008_1_Hypsibius_dujardini_scaffold8	549094	550344	1251	hypothetical protein	- none -	549094	550344
fig|6666666.161614.peg.465	CDS	gi_957788172_gb_LMYF01000008_1_Hypsibius_dujardini_scaffold8	550347	551324	978	MoxR-like ATPases	- none -	550347	551324
fig|6666666.161614.peg.466	CDS	gi_957788172_gb_LMYF01000008_1_Hypsibius_dujardini_scaffold8	551599	551760	162	hypothetical protein	- none -	551599	551760
fig|6666666.161614.peg.467	CDS	gi_957788172_gb_LMYF01000008_1_Hypsibius_dujardini_scaffold8	551822	553147	1326	Cell division protein DivIC (FtsB), stabilizes FtsL against RasP cleavage	Bacterial Cell Division, Bacterial Cytoskeleton, Cell division-ribosomal stress proteins cluster, Stationary phase repair cluster	551822	553147
fig|6666666.161614.peg.468	CDS	gi_957788172_gb_LMYF01000008_1_Hypsibius_dujardini_scaffold8	553195	553902	708	tRNA pseudouridine synthase B (EC 4.2.1.70)	CBSS-138119.3.peg.2719, RNA pseudouridine syntheses, tRNA processing	553195	553902
fig|6666666.161614.peg.469	CDS	gi_957788172_gb_LMYF01000008_1_Hypsibius_dujardini_scaffold8	556268	553884	2385	hypothetical protein	- none -	553884	556268
fig|6666666.161614.peg.470	CDS	gi_957788172_gb_LMYF01000008_1_Hypsibius_dujardini_scaffold8	556289	557023	735	RNA methyltransferase, TrmH family	- none -	556289	557023
fig|6666666.161614.peg.471	CDS	gi_957788172_gb_LMYF01000008_1_Hypsibius_dujardini_scaffold8	558275	557016	1260	ABC transporter, permease protein	- none -	557016	558275
fig|6666666.161614.peg.472	CDS	gi_957788172_gb_LMYF01000008_1_Hypsibius_dujardini_scaffold8	558417	558295	123	hypothetical protein	- none -	558295	558417
fig|6666666.161614.peg.473	CDS	gi_957788172_gb_LMYF01000008_1_Hypsibius_dujardini_scaffold8	558383	559654	1272	hypothetical protein	- none -	558383	559654
fig|6666666.161614.peg.474	CDS	gi_957788172_gb_LMYF01000008_1_Hypsibius_dujardini_scaffold8	559855	560508	654	Transaldolase (EC 2.2.1.2)	Pentose phosphate pathway	559855	560508
fig|6666666.161614.peg.475	CDS	gi_957788172_gb_LMYF01000008_1_Hypsibius_dujardini_scaffold8	560952	560557	396	hypothetical protein	- none -	560557	560952
fig|6666666.161614.peg.476	CDS	gi_957788172_gb_LMYF01000008_1_Hypsibius_dujardini_scaffold8	561091	561909	819	hypothetical protein	- none -	561091	561909
fig|6666666.161614.peg.477	CDS	gi_957788172_gb_LMYF01000008_1_Hypsibius_dujardini_scaffold8	565913	561987	3927	hypothetical protein	- none -	561987	565913
fig|6666666.161614.peg.478	CDS	gi_957788172_gb_LMYF01000008_1_Hypsibius_dujardini_scaffold8	567578	566070	1509	COG1649 predicted glycoside hydrolase	- none -	566070	567578
fig|6666666.161614.peg.479	CDS	gi_957788172_gb_LMYF01000008_1_Hypsibius_dujardini_scaffold8	567776	569563	1788	Oligo-1,6-glucosidase (EC 3.2.1.10)	Maltose and Maltodextrin Utilization	567776	569563
fig|6666666.161614.peg.480	CDS	gi_957788172_gb_LMYF01000008_1_Hypsibius_dujardini_scaffold8	569583	570890	1308	D-xylose proton-symporter XylE	Xylose utilization	569583	570890
fig|6666666.161614.peg.481	CDS	gi_957788172_gb_LMYF01000008_1_Hypsibius_dujardini_scaffold8	571490	570927	564	Emb|CAB62313.1	- none -	570927	571490
fig|6666666.161614.peg.482	CDS	gi_957788172_gb_LMYF01000008_1_Hypsibius_dujardini_scaffold8	573233	572421	813	hypothetical protein	- none -	572421	573233
fig|6666666.161614.peg.483	CDS	gi_957788172_gb_LMYF01000008_1_Hypsibius_dujardini_scaffold8	575034	573538	1497	Alkaline phosphatase (EC 3.1.3.1)	Phosphate metabolism, Pterin synthesis related cluster	573538	575034
fig|6666666.161614.peg.484	CDS	gi_957788172_gb_LMYF01000008_1_Hypsibius_dujardini_scaffold8	576020	575124	897	hypothetical protein	- none -	575124	576020
fig|6666666.161614.peg.485	CDS	gi_957788172_gb_LMYF01000008_1_Hypsibius_dujardini_scaffold8	576087	576983	897	1-pyrroline-4-hydroxy-2-carboxylate deaminase (EC 3.5.4.22)	- none -	576087	576983
fig|6666666.161614.peg.486	CDS	gi_957788172_gb_LMYF01000008_1_Hypsibius_dujardini_scaffold8	577016	578503	1488	Ketoglutarate semialdehyde dehydrogenase (EC 1.2.1.26)	D-Galacturonate and D-Glucuronate Utilization, L-Arabinose utilization, Xylose utilization	577016	578503
fig|6666666.161614.peg.487	CDS	gi_957788172_gb_LMYF01000008_1_Hypsibius_dujardini_scaffold8	578807	579385	579	Alkylphosphonate utilization operon protein PhnA	Alkylphosphonate utilization	578807	579385
fig|6666666.161614.peg.488	CDS	gi_957788172_gb_LMYF01000008_1_Hypsibius_dujardini_scaffold8	579772	579407	366	hypothetical protein	- none -	579407	579772
fig|6666666.161614.peg.489	CDS	gi_957788172_gb_LMYF01000008_1_Hypsibius_dujardini_scaffold8	581209	579800	1410	Exopolyphosphatase (EC 3.6.1.11)	Phosphate metabolism, Polyphosphate	579800	581209
fig|6666666.161614.peg.490	CDS	gi_957788172_gb_LMYF01000008_1_Hypsibius_dujardini_scaffold8	581225	581377	153	hypothetical protein	- none -	581225	581377
fig|6666666.161614.peg.491	CDS	gi_957788172_gb_LMYF01000008_1_Hypsibius_dujardini_scaffold8	583077	581392	1686	hypothetical protein	- none -	581392	583077
fig|6666666.161614.peg.492	CDS	gi_957788172_gb_LMYF01000008_1_Hypsibius_dujardini_scaffold8	584341	583265	1077	hypothetical protein	- none -	583265	584341
fig|6666666.161614.peg.493	CDS	gi_957788172_gb_LMYF01000008_1_Hypsibius_dujardini_scaffold8	585637	584393	1245	Sterol desaturase-related protein	- none -	584393	585637
fig|6666666.161614.peg.494	CDS	gi_957788172_gb_LMYF01000008_1_Hypsibius_dujardini_scaffold8	585754	586830	1077	4-hydroxyproline epimerase (EC 5.1.1.8)	- none -	585754	586830
fig|6666666.161614.peg.495	CDS	gi_957788172_gb_LMYF01000008_1_Hypsibius_dujardini_scaffold8	586954	588285	1332	Oxidoreductase, N-terminal precursor	- none -	586954	588285
fig|6666666.161614.peg.496	CDS	gi_957788172_gb_LMYF01000008_1_Hypsibius_dujardini_scaffold8	588306	589550	1245	D-amino acid dehydrogenase small subunit (EC 1.4.99.1)	Pyruvate Alanine Serine Interconversions, Respiratory dehydrogenases 1	588306	589550
fig|6666666.161614.peg.497	CDS	gi_957788172_gb_LMYF01000008_1_Hypsibius_dujardini_scaffold8	589627	591228	1602	hypothetical protein	- none -	589627	591228
fig|6666666.161614.peg.498	CDS	gi_957788172_gb_LMYF01000008_1_Hypsibius_dujardini_scaffold8	592150	591251	900	hypothetical protein	- none -	591251	592150
fig|6666666.161614.peg.499	CDS	gi_957788172_gb_LMYF01000008_1_Hypsibius_dujardini_scaffold8	592807	592226	582	hypothetical protein	- none -	592226	592807
fig|6666666.161614.peg.500	CDS	gi_957788172_gb_LMYF01000008_1_Hypsibius_dujardini_scaffold8	593507	592995	513	Phosphoribosylaminoimidazole carboxylase catalytic subunit (EC 4.1.1.21)	De Novo Purine Biosynthesis	592995	593507
fig|6666666.161614.peg.501	CDS	gi_957788172_gb_LMYF01000008_1_Hypsibius_dujardini_scaffold8	594887	593565	1323	Agglutination protein	- none -	593565	594887
fig|6666666.161614.peg.502	CDS	gi_957788172_gb_LMYF01000008_1_Hypsibius_dujardini_scaffold8	598015	594899	3117	RND multidrug efflux transporter; Acriflavin resistance protein	- none -	594899	598015
fig|6666666.161614.peg.503	CDS	gi_957788172_gb_LMYF01000008_1_Hypsibius_dujardini_scaffold8	599184	598132	1053	Probable Co/Zn/Cd efflux system membrane fusion protein	Cobalt-zinc-cadmium resistance	598132	599184
fig|6666666.161614.peg.504	CDS	gi_957788172_gb_LMYF01000008_1_Hypsibius_dujardini_scaffold8	600446	599328	1119	Phosphoribosylaminoimidazole carboxylase ATPase subunit (EC 4.1.1.21)	De Novo Purine Biosynthesis	599328	600446
fig|6666666.161614.peg.505	CDS	gi_957788172_gb_LMYF01000008_1_Hypsibius_dujardini_scaffold8	600603	601805	1203	4-hydroxyphenylpyruvate dioxygenase (EC 1.13.11.27)	Aromatic amino acid degradation, Homogentisate pathway of aromatic compound degradation, Pterin carbinolamine dehydratase	600603	601805
fig|6666666.161614.peg.506	CDS	gi_957788172_gb_LMYF01000008_1_Hypsibius_dujardini_scaffold8	601960	603150	1191	probable exported protein STY0357	- none -	601960	603150
fig|6666666.161614.peg.507	CDS	gi_957788172_gb_LMYF01000008_1_Hypsibius_dujardini_scaffold8	604415	603153	1263	Aspartokinase (EC 2.7.2.4)	CBSS-216591.1.peg.168, Lysine Biosynthesis DAP Pathway, GJO scratch, Threonine and Homoserine Biosynthesis	603153	604415
fig|6666666.161614.peg.508	CDS	gi_957788172_gb_LMYF01000008_1_Hypsibius_dujardini_scaffold8	604541	605557	1017	Fructose-1,6-bisphosphatase, type I (EC 3.1.3.11)	Glycolysis and Gluconeogenesis	604541	605557
fig|6666666.161614.peg.509	CDS	gi_957788172_gb_LMYF01000008_1_Hypsibius_dujardini_scaffold8	605550	606011	462	Transcriptional regulator, MarR family	- none -	605550	606011
fig|6666666.161614.peg.510	CDS	gi_957788172_gb_LMYF01000008_1_Hypsibius_dujardini_scaffold8	606021	606782	762	ABC transporter, ATP-binding protein	- none -	606021	606782
fig|6666666.161614.peg.511	CDS	gi_957788172_gb_LMYF01000008_1_Hypsibius_dujardini_scaffold8	606793	607230	438	FKBP-type peptidyl-prolyl cis-trans isomerase FklB (EC 5.2.1.8)	Peptidyl-prolyl cis-trans isomerase	606793	607230
fig|6666666.161614.peg.512	CDS	gi_957788172_gb_LMYF01000008_1_Hypsibius_dujardini_scaffold8	607239	607778	540	hypothetical protein	- none -	607239	607778
fig|6666666.161614.peg.513	CDS	gi_957788172_gb_LMYF01000008_1_Hypsibius_dujardini_scaffold8	607850	608398	549	ADP-ribose pyrophosphatase (EC 3.6.1.13)	CBSS-216591.1.peg.168, NAD and NADP cofactor biosynthesis global, Nudix proteins (nucleoside triphosphate hydrolases)	607850	608398
fig|6666666.161614.peg.514	CDS	gi_957788172_gb_LMYF01000008_1_Hypsibius_dujardini_scaffold8	608492	609823	1332	hypothetical protein	- none -	608492	609823
fig|6666666.161614.peg.515	CDS	gi_957788172_gb_LMYF01000008_1_Hypsibius_dujardini_scaffold8	611137	609839	1299	Dihydrofolate synthase (EC 6.3.2.12) / Folylpolyglutamate synthase (EC 6.3.2.17)	Folate Biosynthesis, Folate Biosynthesis	609839	611137
fig|6666666.161614.peg.516	CDS	gi_957788172_gb_LMYF01000008_1_Hypsibius_dujardini_scaffold8	611140	611355	216	hypothetical protein	- none -	611140	611355
fig|6666666.161614.peg.517	CDS	gi_957788172_gb_LMYF01000008_1_Hypsibius_dujardini_scaffold8	612318	611449	870	Erythrocyte membrane protein 1	- none -	611449	612318
fig|6666666.161614.peg.518	CDS	gi_957788172_gb_LMYF01000008_1_Hypsibius_dujardini_scaffold8	613357	612464	894	Permease of the drug/metabolite transporter (DMT) superfamily	Queuosine-Archaeosine Biosynthesis	612464	613357
fig|6666666.161614.peg.519	CDS	gi_957788172_gb_LMYF01000008_1_Hypsibius_dujardini_scaffold8	614673	613372	1302	Radical SAM domain protein	- none -	613372	614673
fig|6666666.161614.peg.520	CDS	gi_957788172_gb_LMYF01000008_1_Hypsibius_dujardini_scaffold8	615221	614670	552	hypothetical protein	- none -	614670	615221
fig|6666666.161614.peg.521	CDS	gi_957788172_gb_LMYF01000008_1_Hypsibius_dujardini_scaffold8	616267	615224	1044	Agmatinase (EC 3.5.3.11)	Arginine and Ornithine Degradation, Polyamine Metabolism	615224	616267
fig|6666666.161614.peg.522	CDS	gi_957788172_gb_LMYF01000008_1_Hypsibius_dujardini_scaffold8	616378	616974	597	Thiopurine S-methyltransferase (EC 2.1.1.67)	- none -	616378	616974
fig|6666666.161614.peg.523	CDS	gi_957788172_gb_LMYF01000008_1_Hypsibius_dujardini_scaffold8	618042	616975	1068	Linoleoyl-CoA desaturase (EC 1.14.19.3)	- none -	616975	618042
fig|6666666.161614.peg.524	CDS	gi_957788172_gb_LMYF01000008_1_Hypsibius_dujardini_scaffold8	618885	618148	738	LMBE-RELATED PROTEIN	- none -	618148	618885
fig|6666666.161614.peg.525	CDS	gi_957788172_gb_LMYF01000008_1_Hypsibius_dujardini_scaffold8	619559	618990	570	hypothetical protein	- none -	618990	619559
fig|6666666.161614.peg.526	CDS	gi_957788172_gb_LMYF01000008_1_Hypsibius_dujardini_scaffold8	622348	619742	2607	Cytochrome c heme lyase subunit CcmF	Biogenesis of c-type cytochromes, Copper homeostasis	619742	622348
fig|6666666.161614.peg.527	CDS	gi_957788172_gb_LMYF01000008_1_Hypsibius_dujardini_scaffold8	622816	622361	456	Cytochrome c-type biogenesis protein CcmE, heme chaperone	Biogenesis of c-type cytochromes	622361	622816
fig|6666666.161614.peg.528	CDS	gi_957788172_gb_LMYF01000008_1_Hypsibius_dujardini_scaffold8	624194	622905	1290	hypothetical protein	- none -	622905	624194
fig|6666666.161614.peg.529	CDS	gi_957788172_gb_LMYF01000008_1_Hypsibius_dujardini_scaffold8	624357	625514	1158	Butyryl-CoA dehydrogenase (EC 1.3.99.2)	- none -	624357	625514
fig|6666666.161614.peg.530	CDS	gi_957788172_gb_LMYF01000008_1_Hypsibius_dujardini_scaffold8	625557	626834	1278	Xaa-Pro dipeptidase family enzyme	- none -	625557	626834
fig|6666666.161614.peg.531	CDS	gi_957788172_gb_LMYF01000008_1_Hypsibius_dujardini_scaffold8	626844	627488	645	Hypothetical protein YggS, proline synthase co-transcribed bacterial homolog PROSC	A Hypothetical Protein Related to Proline Metabolism	626844	627488
fig|6666666.161614.peg.532	CDS	gi_957788172_gb_LMYF01000008_1_Hypsibius_dujardini_scaffold8	627555	628031	477	hypothetical protein	- none -	627555	628031
fig|6666666.161614.peg.533	CDS	gi_957788172_gb_LMYF01000008_1_Hypsibius_dujardini_scaffold8	628681	628034	648	Protocatechuate 3,4-dioxygenase beta chain (EC 1.13.11.3)	- none -	628034	628681
fig|6666666.161614.peg.534	CDS	gi_957788172_gb_LMYF01000008_1_Hypsibius_dujardini_scaffold8	628866	629876	1011	putative two-component system sensor protein, no kinase domain	- none -	628866	629876
fig|6666666.161614.peg.535	CDS	gi_957788172_gb_LMYF01000008_1_Hypsibius_dujardini_scaffold8	629873	630595	723	Two-component system response regulator	- none -	629873	630595
fig|6666666.161614.peg.536	CDS	gi_957788172_gb_LMYF01000008_1_Hypsibius_dujardini_scaffold8	631014	630598	417	hypothetical protein	- none -	630598	631014
fig|6666666.161614.peg.537	CDS	gi_957788172_gb_LMYF01000008_1_Hypsibius_dujardini_scaffold8	631185	631030	156	hypothetical protein	- none -	631030	631185
fig|6666666.161614.peg.538	CDS	gi_957788172_gb_LMYF01000008_1_Hypsibius_dujardini_scaffold8	631324	632343	1020	kyphoscoliosis	- none -	631324	632343
fig|6666666.161614.peg.539	CDS	gi_957788172_gb_LMYF01000008_1_Hypsibius_dujardini_scaffold8	633379	632354	1026	hypothetical protein	- none -	632354	633379
fig|6666666.161614.peg.540	CDS	gi_957788172_gb_LMYF01000008_1_Hypsibius_dujardini_scaffold8	634282	633464	819	hypothetical protein	- none -	633464	634282
fig|6666666.161614.peg.541	CDS	gi_957788172_gb_LMYF01000008_1_Hypsibius_dujardini_scaffold8	634484	635098	615	RNA polymerase ECF-type sigma factor	- none -	634484	635098
fig|6666666.161614.peg.542	CDS	gi_957788172_gb_LMYF01000008_1_Hypsibius_dujardini_scaffold8	635148	636092	945	putative anti-sigma factor	- none -	635148	636092
fig|6666666.161614.peg.543	CDS	gi_957788172_gb_LMYF01000008_1_Hypsibius_dujardini_scaffold8	636148	637932	1785	hypothetical protein	- none -	636148	637932
fig|6666666.161614.peg.544	CDS	gi_957788172_gb_LMYF01000008_1_Hypsibius_dujardini_scaffold8	638013	640343	2331	hypothetical protein	- none -	638013	640343
fig|6666666.161614.peg.545	CDS	gi_957788172_gb_LMYF01000008_1_Hypsibius_dujardini_scaffold8	640470	641186	717	hypothetical protein	- none -	640470	641186
fig|6666666.161614.peg.546	CDS	gi_957788172_gb_LMYF01000008_1_Hypsibius_dujardini_scaffold8	641328	641708	381	putative integral membrane protein	- none -	641328	641708
fig|6666666.161614.peg.547	CDS	gi_957788172_gb_LMYF01000008_1_Hypsibius_dujardini_scaffold8	641797	642099	303	hypothetical protein	- none -	641797	642099
fig|6666666.161614.peg.548	CDS	gi_957788172_gb_LMYF01000008_1_Hypsibius_dujardini_scaffold8	642252	642503	252	hypothetical protein	- none -	642252	642503
fig|6666666.161614.peg.549	CDS	gi_957788172_gb_LMYF01000008_1_Hypsibius_dujardini_scaffold8	643500	642508	993	Adenosine deaminase (EC 3.5.4.4)	Purine conversions	642508	643500
fig|6666666.161614.peg.550	CDS	gi_957788172_gb_LMYF01000008_1_Hypsibius_dujardini_scaffold8	643831	644787	957	hypothetical protein	- none -	643831	644787
fig|6666666.161614.peg.551	CDS	gi_957788172_gb_LMYF01000008_1_Hypsibius_dujardini_scaffold8	645372	644854	519	hypothetical protein	- none -	644854	645372
fig|6666666.161614.peg.552	CDS	gi_957788172_gb_LMYF01000008_1_Hypsibius_dujardini_scaffold8	645883	645410	474	Ferric siderophore transport system, periplasmic binding protein TonB	Hemin transport system, Ton and Tol transport systems	645410	645883
fig|6666666.161614.peg.553	CDS	gi_957788172_gb_LMYF01000008_1_Hypsibius_dujardini_scaffold8	646425	645943	483	hypothetical protein	- none -	645943	646425
fig|6666666.161614.peg.554	CDS	gi_957788172_gb_LMYF01000008_1_Hypsibius_dujardini_scaffold8	647811	646549	1263	hypothetical protein	- none -	646549	647811
fig|6666666.161614.peg.555	CDS	gi_957788172_gb_LMYF01000008_1_Hypsibius_dujardini_scaffold8	647898	648074	177	hypothetical protein	- none -	647898	648074
fig|6666666.161614.peg.556	CDS	gi_957788172_gb_LMYF01000008_1_Hypsibius_dujardini_scaffold8	648275	649240	966	hypothetical protein	- none -	648275	649240
fig|6666666.161614.peg.557	CDS	gi_957788172_gb_LMYF01000008_1_Hypsibius_dujardini_scaffold8	649868	649299	570	Ribosomal-protein-serine acetyltransferase (EC 2.3.1.-)	- none -	649299	649868
fig|6666666.161614.peg.558	CDS	gi_957788172_gb_LMYF01000008_1_Hypsibius_dujardini_scaffold8	650630	649989	642	hypothetical protein	- none -	649989	650630
fig|6666666.161614.peg.559	CDS	gi_957788172_gb_LMYF01000008_1_Hypsibius_dujardini_scaffold8	651615	650977	639	hypothetical protein	- none -	650977	651615
fig|6666666.161614.peg.560	CDS	gi_957788172_gb_LMYF01000008_1_Hypsibius_dujardini_scaffold8	652470	651628	843	hypothetical protein	- none -	651628	652470
fig|6666666.161614.peg.561	CDS	gi_957788172_gb_LMYF01000008_1_Hypsibius_dujardini_scaffold8	652872	654548	1677	Glutaminyl-tRNA synthetase (EC 6.1.1.18)	tRNA aminoacylation, Glu and Gln	652872	654548
fig|6666666.161614.peg.562	CDS	gi_957788172_gb_LMYF01000008_1_Hypsibius_dujardini_scaffold8	654768	655148	381	hypothetical protein	- none -	654768	655148
fig|6666666.161614.peg.563	CDS	gi_957788172_gb_LMYF01000008_1_Hypsibius_dujardini_scaffold8	656793	655249	1545	Methylmalonyl-CoA mutase (EC 5.4.99.2)	G3E family of P-loop GTPases (metallocenter biosynthesis), Serine-glyoxylate cycle	655249	656793
fig|6666666.161614.peg.564	CDS	gi_957788172_gb_LMYF01000008_1_Hypsibius_dujardini_scaffold8	657206	656853	354	23Sr RNA gene	- none -	656853	657206
fig|6666666.161614.peg.565	CDS	gi_957788172_gb_LMYF01000008_1_Hypsibius_dujardini_scaffold8	657773	657261	513	hypothetical protein	- none -	657261	657773
fig|6666666.161614.peg.566	CDS	gi_957788172_gb_LMYF01000008_1_Hypsibius_dujardini_scaffold8	657829	658260	432	probable iron binding protein from the HesB_IscA_SufA family	- none -	657829	658260
fig|6666666.161614.peg.567	CDS	gi_957788172_gb_LMYF01000008_1_Hypsibius_dujardini_scaffold8	661449	658381	3069	Protein-export membrane protein SecD (TC 3.A.5.1.1) / Protein-export membrane protein SecF (TC 3.A.5.1.1)	CBSS-211586.1.peg.2832, CBSS-211586.1.peg.2832	658381	661449
fig|6666666.161614.peg.568	CDS	gi_957788172_gb_LMYF01000008_1_Hypsibius_dujardini_scaffold8	661685	662959	1275	hypothetical protein	- none -	661685	662959
fig|6666666.161614.peg.569	CDS	gi_957788172_gb_LMYF01000008_1_Hypsibius_dujardini_scaffold8	662963	663088	126	hypothetical protein	- none -	662963	663088
fig|6666666.161614.peg.570	CDS	gi_957788172_gb_LMYF01000008_1_Hypsibius_dujardini_scaffold8	663106	664296	1191	Aspartate aminotransferase (EC 2.6.1.1)	CBSS-216591.1.peg.168, Glutamine, Glutamate, Aspartate and Asparagine Biosynthesis, Threonine and Homoserine Biosynthesis	663106	664296
fig|6666666.161614.peg.571	CDS	gi_957788172_gb_LMYF01000008_1_Hypsibius_dujardini_scaffold8	665044	664298	747	Thioredoxin	- none -	664298	665044
fig|6666666.161614.peg.572	CDS	gi_957788172_gb_LMYF01000008_1_Hypsibius_dujardini_scaffold8	665682	665101	582	Dephospho-CoA kinase (EC 2.7.1.24)	Coenzyme A Biosynthesis	665101	665682
fig|6666666.161614.peg.573	CDS	gi_957788172_gb_LMYF01000008_1_Hypsibius_dujardini_scaffold8	666127	665789	339	Preprotein translocase subunit YajC (TC 3.A.5.1.1)	CBSS-211586.1.peg.2832	665789	666127
fig|6666666.161614.peg.574	CDS	gi_957788172_gb_LMYF01000008_1_Hypsibius_dujardini_scaffold8	666619	666152	468	hypothetical protein	- none -	666152	666619
fig|6666666.161614.peg.575	CDS	gi_957788172_gb_LMYF01000008_1_Hypsibius_dujardini_scaffold8	667590	666664	927	Transcription termination protein NusB	Riboflavin synthesis cluster, Transcription factors bacterial	666664	667590
fig|6666666.161614.peg.576	CDS	gi_957788172_gb_LMYF01000008_1_Hypsibius_dujardini_scaffold8	667805	670771	2967	hypothetical protein	- none -	667805	670771
fig|6666666.161614.peg.577	CDS	gi_957788172_gb_LMYF01000008_1_Hypsibius_dujardini_scaffold8	671026	671307	282	Heat shock protein 60 family co-chaperone GroES	GroEL GroES	671026	671307
fig|6666666.161614.peg.578	CDS	gi_957788172_gb_LMYF01000008_1_Hypsibius_dujardini_scaffold8	671396	673030	1635	Heat shock protein 60 family chaperone GroEL	GroEL GroES	671396	673030
fig|6666666.161614.peg.579	CDS	gi_957788172_gb_LMYF01000008_1_Hypsibius_dujardini_scaffold8	673249	674220	972	hypothetical protein	- none -	673249	674220
fig|6666666.161614.peg.580	CDS	gi_957788172_gb_LMYF01000008_1_Hypsibius_dujardini_scaffold8	674498	678832	4335	hypothetical protein	- none -	674498	678832
fig|6666666.161614.peg.581	CDS	gi_957788172_gb_LMYF01000008_1_Hypsibius_dujardini_scaffold8	678936	680615	1680	ABC transporter, ATP-binding protein	- none -	678936	680615
fig|6666666.161614.peg.582	CDS	gi_957788172_gb_LMYF01000008_1_Hypsibius_dujardini_scaffold8	681124	682548	1425	Amino acid permease	- none -	681124	682548
fig|6666666.161614.peg.583	CDS	gi_957788172_gb_LMYF01000008_1_Hypsibius_dujardini_scaffold8	683965	682565	1401	Transcriptional regulator, GntR family domain	- none -	682565	683965
fig|6666666.161614.peg.584	CDS	gi_957788172_gb_LMYF01000008_1_Hypsibius_dujardini_scaffold8	684209	684081	129	hypothetical protein	- none -	684081	684209
fig|6666666.161614.peg.585	CDS	gi_957788172_gb_LMYF01000008_1_Hypsibius_dujardini_scaffold8	684176	685072	897	Permease of the drug/metabolite transporter (DMT) superfamily	Queuosine-Archaeosine Biosynthesis	684176	685072
fig|6666666.161614.peg.586	CDS	gi_957788172_gb_LMYF01000008_1_Hypsibius_dujardini_scaffold8	685069	685581	513	Transcriptional regulator, MarR family	- none -	685069	685581
fig|6666666.161614.peg.587	CDS	gi_957788172_gb_LMYF01000008_1_Hypsibius_dujardini_scaffold8	685600	686667	1068	Branched-chain amino acid aminotransferase (EC 2.6.1.42)	Alanine biosynthesis, Branched-Chain Amino Acid Biosynthesis, Isoleucine degradation, Leucine Biosynthesis, Leucine Degradation and HMG-CoA Metabolism, Pyruvate Alanine Serine Interconversions, Valine degradation	685600	686667
fig|6666666.161614.peg.588	CDS	gi_957788172_gb_LMYF01000008_1_Hypsibius_dujardini_scaffold8	688731	686719	2013	hypothetical protein	- none -	686719	688731
fig|6666666.161614.peg.589	CDS	gi_957788172_gb_LMYF01000008_1_Hypsibius_dujardini_scaffold8	688899	689588	690	hypothetical protein	- none -	688899	689588
fig|6666666.161614.peg.590	CDS	gi_957788172_gb_LMYF01000008_1_Hypsibius_dujardini_scaffold8	690972	689596	1377	Glycosyltransferase involved in cell wall biogenesis	- none -	689596	690972
fig|6666666.161614.peg.591	CDS	gi_957788172_gb_LMYF01000008_1_Hypsibius_dujardini_scaffold8	691266	691919	654	hypothetical protein	- none -	691266	691919
fig|6666666.161614.peg.592	CDS	gi_957788172_gb_LMYF01000008_1_Hypsibius_dujardini_scaffold8	692523	692158	366	DNA methylase, putative	- none -	692158	692523
fig|6666666.161614.peg.593	CDS	gi_957788172_gb_LMYF01000008_1_Hypsibius_dujardini_scaffold8	692694	692554	141	hypothetical protein	- none -	692554	692694
fig|6666666.161614.peg.594	CDS	gi_957788172_gb_LMYF01000008_1_Hypsibius_dujardini_scaffold8	692773	693174	402	hypothetical protein	- none -	692773	693174
fig|6666666.161614.peg.595	CDS	gi_957788172_gb_LMYF01000008_1_Hypsibius_dujardini_scaffold8	693414	696926	3513	hypothetical protein	- none -	693414	696926
fig|6666666.161614.peg.596	CDS	gi_957788172_gb_LMYF01000008_1_Hypsibius_dujardini_scaffold8	697429	698790	1362	hypothetical protein	- none -	697429	698790
fig|6666666.161614.peg.597	CDS	gi_957788172_gb_LMYF01000008_1_Hypsibius_dujardini_scaffold8	699600	698884	717	nodulin 21-related protein	- none -	698884	699600
fig|6666666.161614.peg.598	CDS	gi_957788172_gb_LMYF01000008_1_Hypsibius_dujardini_scaffold8	700897	699680	1218	Ornithine aminotransferase (EC 2.6.1.13)	Arginine and Ornithine Degradation	699680	700897
fig|6666666.161614.peg.599	CDS	gi_957788172_gb_LMYF01000008_1_Hypsibius_dujardini_scaffold8	701463	701107	357	Queuosine biosynthesis QueD, PTPS-I	Queuosine-Archaeosine Biosynthesis	701107	701463
fig|6666666.161614.peg.600	CDS	gi_957788172_gb_LMYF01000008_1_Hypsibius_dujardini_scaffold8	702450	701542	909	4-diphosphocytidyl-2-C-methyl-D-erythritol kinase (EC 2.7.1.148)	Isoprenoid Biosynthesis, Nonmevalonate Branch of Isoprenoid Biosynthesis	701542	702450
fig|6666666.161614.peg.601	CDS	gi_957788172_gb_LMYF01000008_1_Hypsibius_dujardini_scaffold8	703071	702466	606	hypothetical protein	- none -	702466	703071
fig|6666666.161614.peg.602	CDS	gi_957788172_gb_LMYF01000008_1_Hypsibius_dujardini_scaffold8	704176	703211	966	Electron transfer flavoprotein, alpha subunit	Acetyl-CoA fermentation to Butyrate	703211	704176
fig|6666666.161614.peg.603	CDS	gi_957788172_gb_LMYF01000008_1_Hypsibius_dujardini_scaffold8	704951	704208	744	Electron transfer flavoprotein, beta subunit	Acetyl-CoA fermentation to Butyrate	704208	704951
fig|6666666.161614.peg.604	CDS	gi_957788172_gb_LMYF01000008_1_Hypsibius_dujardini_scaffold8	705035	705427	393	tetratricopeptide repeat domain protein	- none -	705035	705427
fig|6666666.161614.peg.605	CDS	gi_957788172_gb_LMYF01000008_1_Hypsibius_dujardini_scaffold8	705500	706840	1341	tRNA(Ile)-lysidine synthetase	- none -	705500	706840
fig|6666666.161614.peg.606	CDS	gi_957788172_gb_LMYF01000008_1_Hypsibius_dujardini_scaffold8	707485	706841	645	Rhomboid family protein	- none -	706841	707485
fig|6666666.161614.peg.607	CDS	gi_957788172_gb_LMYF01000008_1_Hypsibius_dujardini_scaffold8	708461	707532	930	Riboflavin kinase (EC 2.7.1.26) / FMN adenylyltransferase (EC 2.7.7.2)	Riboflavin, FMN and FAD metabolism, Riboflavin, FMN and FAD metabolism, riboflavin to FAD, riboflavin to FAD	707532	708461
fig|6666666.161614.peg.608	CDS	gi_957788172_gb_LMYF01000008_1_Hypsibius_dujardini_scaffold8	708576	709745	1170	Phosphoribosylformylglycinamidine cyclo-ligase (EC 6.3.3.1)	De Novo Purine Biosynthesis	708576	709745
fig|6666666.161614.peg.609	CDS	gi_957788172_gb_LMYF01000008_1_Hypsibius_dujardini_scaffold8	711597	709750	1848	hypothetical protein	- none -	709750	711597
fig|6666666.161614.peg.610	CDS	gi_957788172_gb_LMYF01000008_1_Hypsibius_dujardini_scaffold8	711965	711594	372	Transcriptional regulator, MecI family	- none -	711594	711965
fig|6666666.161614.peg.611	CDS	gi_957788172_gb_LMYF01000008_1_Hypsibius_dujardini_scaffold8	712090	712779	690	Cell division transporter, ATP-binding protein FtsE (TC 3.A.5.1.1)	Bacterial Cell Division	712090	712779
fig|6666666.161614.peg.612	CDS	gi_957788172_gb_LMYF01000008_1_Hypsibius_dujardini_scaffold8	713821	712760	1062	Uncharacterized 44.6 kDa protein in cps region (ORF9)	- none -	712760	713821
fig|6666666.161614.peg.613	CDS	gi_957788172_gb_LMYF01000008_1_Hypsibius_dujardini_scaffold8	715074	713887	1188	hypothetical protein	- none -	713887	715074
fig|6666666.161614.peg.614	CDS	gi_957788172_gb_LMYF01000008_1_Hypsibius_dujardini_scaffold8	717726	715108	2619	TonB-dependent receptor, putative	- none -	715108	717726
fig|6666666.161614.peg.615	CDS	gi_957788172_gb_LMYF01000008_1_Hypsibius_dujardini_scaffold8	718452	717847	606	hypothetical protein	- none -	717847	718452
fig|6666666.161614.rna.10	RNA	gi_957788172_gb_LMYF01000008_1_Hypsibius_dujardini_scaffold8	718580	718507	74	tRNA-His-GTG	- none -	718507	718580
fig|6666666.161614.peg.616	CDS	gi_957788172_gb_LMYF01000008_1_Hypsibius_dujardini_scaffold8	718842	720992	2151	Tail-specific protease precursor (EC 3.4.21.102)	- none -	718842	720992
fig|6666666.161614.peg.617	CDS	gi_957788172_gb_LMYF01000008_1_Hypsibius_dujardini_scaffold8	721561	721052	510	hypothetical protein	- none -	721052	721561
fig|6666666.161614.peg.618	CDS	gi_957788172_gb_LMYF01000008_1_Hypsibius_dujardini_scaffold8	721706	724507	2802	hypothetical protein	- none -	721706	724507
fig|6666666.161614.peg.619	CDS	gi_957788172_gb_LMYF01000008_1_Hypsibius_dujardini_scaffold8	727217	724590	2628	Valyl-tRNA synthetase (EC 6.1.1.9)	tRNA aminoacylation, Val	724590	727217
fig|6666666.161614.peg.620	CDS	gi_957788172_gb_LMYF01000008_1_Hypsibius_dujardini_scaffold8	727744	727328	417	DNA-binding response regulator, LuxR family	- none -	727328	727744
fig|6666666.161614.peg.621	CDS	gi_957788172_gb_LMYF01000008_1_Hypsibius_dujardini_scaffold8	728142	728873	732	hypothetical protein	- none -	728142	728873
fig|6666666.161614.peg.622	CDS	gi_957788172_gb_LMYF01000008_1_Hypsibius_dujardini_scaffold8	729526	728879	648	Leucyl/phenylalanyl-tRNA--protein transferase (EC 2.3.2.6)	Protein degradation	728879	729526
fig|6666666.161614.peg.623	CDS	gi_957788172_gb_LMYF01000008_1_Hypsibius_dujardini_scaffold8	729853	729551	303	hypothetical protein	- none -	729551	729853
fig|6666666.161614.rna.11	RNA	gi_957788172_gb_LMYF01000008_1_Hypsibius_dujardini_scaffold8	730073	730147	75	tRNA-Val-TAC	- none -	730073	730147
fig|6666666.161614.peg.624	CDS	gi_957788172_gb_LMYF01000008_1_Hypsibius_dujardini_scaffold8	730493	730197	297	hypothetical protein	- none -	730197	730493
fig|6666666.161614.peg.625	CDS	gi_957788172_gb_LMYF01000008_1_Hypsibius_dujardini_scaffold8	730615	731433	819	hypothetical protein	- none -	730615	731433
fig|6666666.161614.peg.626	CDS	gi_957788172_gb_LMYF01000008_1_Hypsibius_dujardini_scaffold8	731867	732250	384	hypothetical protein	- none -	731867	732250
fig|6666666.161614.peg.627	CDS	gi_957788172_gb_LMYF01000008_1_Hypsibius_dujardini_scaffold8	732272	733423	1152	Undecaprenyl-phosphate galactosephosphotransferase (EC 2.7.8.6)	Exopolysaccharide Biosynthesis	732272	733423
fig|6666666.161614.peg.628	CDS	gi_957788172_gb_LMYF01000008_1_Hypsibius_dujardini_scaffold8	733480	734430	951	Glycosyl transferase, family 2	- none -	733480	734430
fig|6666666.161614.peg.629	CDS	gi_957788172_gb_LMYF01000008_1_Hypsibius_dujardini_scaffold8	734448	741551	7104	hypothetical protein	- none -	734448	741551
fig|6666666.161614.peg.630	CDS	gi_957788172_gb_LMYF01000008_1_Hypsibius_dujardini_scaffold8	741687	742412	726	Glycosyl transferase, family 2	- none -	741687	742412
fig|6666666.161614.peg.631	CDS	gi_957788172_gb_LMYF01000008_1_Hypsibius_dujardini_scaffold8	742496	743161	666	glycosyl transferase family 2	- none -	742496	743161
fig|6666666.161614.peg.632	CDS	gi_957788172_gb_LMYF01000008_1_Hypsibius_dujardini_scaffold8	743161	744438	1278	hypothetical protein	- none -	743161	744438
fig|6666666.161614.peg.633	CDS	gi_957788172_gb_LMYF01000008_1_Hypsibius_dujardini_scaffold8	745533	744451	1083	membrane protein	- none -	744451	745533
fig|6666666.161614.peg.634	CDS	gi_957788172_gb_LMYF01000008_1_Hypsibius_dujardini_scaffold8	746738	745536	1203	Glycosyl transferase, group 2 family protein	Exopolysaccharide Biosynthesis	745536	746738
fig|6666666.161614.peg.635	CDS	gi_957788172_gb_LMYF01000008_1_Hypsibius_dujardini_scaffold8	747273	748478	1206	hypothetical protein	- none -	747273	748478
fig|6666666.161614.peg.636	CDS	gi_957788172_gb_LMYF01000008_1_Hypsibius_dujardini_scaffold8	748543	750114	1572	hypothetical protein	- none -	748543	750114
fig|6666666.161614.peg.637	CDS	gi_957788172_gb_LMYF01000008_1_Hypsibius_dujardini_scaffold8	750121	751257	1137	Lipid carrier : UDP-N-acetylgalactosaminyltransferase (EC 2.4.1.-) / Alpha-1,3-N-acetylgalactosamine transferase PglA (EC 2.4.1.-); Putative glycosyltransferase	CBSS-296591.1.peg.2330, CBSS-296591.1.peg.2330, CBSS-296591.1.peg.2330, N-linked Glycosylation in Bacteria, N-linked Glycosylation in Bacteria	750121	751257
fig|6666666.161614.peg.638	CDS	gi_957788172_gb_LMYF01000008_1_Hypsibius_dujardini_scaffold8	751398	752456	1059	N-acetylglucosaminyltransferase (EC 2.4.1.-)	- none -	751398	752456
fig|6666666.161614.peg.639	CDS	gi_957788172_gb_LMYF01000008_1_Hypsibius_dujardini_scaffold8	753663	752503	1161	hypothetical protein	- none -	752503	753663
fig|6666666.161614.peg.640	CDS	gi_957788172_gb_LMYF01000008_1_Hypsibius_dujardini_scaffold8	754431	753682	750	hypothetical protein	- none -	753682	754431
fig|6666666.161614.peg.641	CDS	gi_957788172_gb_LMYF01000008_1_Hypsibius_dujardini_scaffold8	756560	754437	2124	hypothetical protein	- none -	754437	756560
fig|6666666.161614.peg.642	CDS	gi_957788172_gb_LMYF01000008_1_Hypsibius_dujardini_scaffold8	757419	757646	228	hypothetical protein	- none -	757419	757646
fig|6666666.161614.peg.643	CDS	gi_957788172_gb_LMYF01000008_1_Hypsibius_dujardini_scaffold8	757652	759364	1713	Glucose-methanol-choline (GMC) oxidoreductase:NAD binding site	Respiratory dehydrogenases 1	757652	759364
fig|6666666.161614.peg.644	CDS	gi_957788172_gb_LMYF01000008_1_Hypsibius_dujardini_scaffold8	760644	759367	1278	hypothetical protein	- none -	759367	760644
fig|6666666.161614.peg.645	CDS	gi_957788172_gb_LMYF01000008_1_Hypsibius_dujardini_scaffold8	761045	761731	687	hypothetical protein	- none -	761045	761731
fig|6666666.161614.peg.646	CDS	gi_957788172_gb_LMYF01000008_1_Hypsibius_dujardini_scaffold8	763085	761766	1320	hypothetical protein	- none -	761766	763085
fig|6666666.161614.peg.647	CDS	gi_957788176_gb_LMYF01000004_1_Hypsibius_dujardini_scaffold4	1579	1109	471	FIG000325: clustered with transcription termination protein NusA	NusA-TFII Cluster, Transcription factors bacterial	1109	1579
fig|6666666.161614.peg.648	CDS	gi_957788176_gb_LMYF01000004_1_Hypsibius_dujardini_scaffold4	1562	1696	135	hypothetical protein	- none -	1562	1696
fig|6666666.161614.peg.649	CDS	gi_957788176_gb_LMYF01000004_1_Hypsibius_dujardini_scaffold4	1748	1990	243	hypothetical protein	- none -	1748	1990
fig|6666666.161614.peg.650	CDS	gi_957788176_gb_LMYF01000004_1_Hypsibius_dujardini_scaffold4	3023	1998	1026	Sulfatase modifying factor 1 precursor (C-alpha-formyglycine- generating enzyme 1)	Sulfatases and sulfatase modifying factor 1	1998	3023
fig|6666666.161614.peg.651	CDS	gi_957788176_gb_LMYF01000004_1_Hypsibius_dujardini_scaffold4	5364	3130	2235	Beta-glucosidase (EC 3.2.1.21)	- none -	3130	5364
fig|6666666.161614.peg.652	CDS	gi_957788176_gb_LMYF01000004_1_Hypsibius_dujardini_scaffold4	6930	5395	1536	FIG00897450: hypothetical protein	- none -	5395	6930
fig|6666666.161614.peg.653	CDS	gi_957788176_gb_LMYF01000004_1_Hypsibius_dujardini_scaffold4	7771	6977	795	Glycerophosphoryl diester phosphodiesterase (EC 3.1.4.46)	CBSS-176299.4.peg.1996A, Glycerol and Glycerol-3-phosphate Uptake and Utilization	6977	7771
fig|6666666.161614.peg.654	CDS	gi_957788176_gb_LMYF01000004_1_Hypsibius_dujardini_scaffold4	9259	7901	1359	Periplasmic beta-glucosidase (EC 3.2.1.21)	- none -	7901	9259
fig|6666666.161614.peg.655	CDS	gi_957788176_gb_LMYF01000004_1_Hypsibius_dujardini_scaffold4	10165	9326	840	hypothetical protein	- none -	9326	10165
fig|6666666.161614.peg.656	CDS	gi_957788176_gb_LMYF01000004_1_Hypsibius_dujardini_scaffold4	11772	10243	1530	hypothetical protein	- none -	10243	11772
fig|6666666.161614.peg.657	CDS	gi_957788176_gb_LMYF01000004_1_Hypsibius_dujardini_scaffold4	15073	11783	3291	TonB-dependent receptor	Ton and Tol transport systems	11783	15073
fig|6666666.161614.peg.658	CDS	gi_957788176_gb_LMYF01000004_1_Hypsibius_dujardini_scaffold4	15254	15078	177	hypothetical protein	- none -	15078	15254
fig|6666666.161614.peg.659	CDS	gi_957788176_gb_LMYF01000004_1_Hypsibius_dujardini_scaffold4	16534	15350	1185	putative anti-sigma factor	- none -	15350	16534
fig|6666666.161614.peg.660	CDS	gi_957788176_gb_LMYF01000004_1_Hypsibius_dujardini_scaffold4	17181	16606	576	RNA polymerase ECF-type sigma factor	- none -	16606	17181
fig|6666666.161614.peg.661	CDS	gi_957788176_gb_LMYF01000004_1_Hypsibius_dujardini_scaffold4	19250	17352	1899	Alpha-glucosidase (EC 3.2.1.20)	D-Galacturonate and D-Glucuronate Utilization, Maltose and Maltodextrin Utilization	17352	19250
fig|6666666.161614.peg.662	CDS	gi_957788176_gb_LMYF01000004_1_Hypsibius_dujardini_scaffold4	21641	19350	2292	Periplasmic beta-glucosidase (EC 3.2.1.21)	- none -	19350	21641
fig|6666666.161614.peg.663	CDS	gi_957788176_gb_LMYF01000004_1_Hypsibius_dujardini_scaffold4	22644	21670	975	Phosphodiesterase/alkaline phosphatase D-like protein	- none -	21670	22644
fig|6666666.161614.peg.664	CDS	gi_957788176_gb_LMYF01000004_1_Hypsibius_dujardini_scaffold4	23391	22729	663	hypothetical protein	- none -	22729	23391
fig|6666666.161614.peg.665	CDS	gi_957788176_gb_LMYF01000004_1_Hypsibius_dujardini_scaffold4	25165	23402	1764	Arabinan endo-1,5-alpha-L-arabinosidase A	- none -	23402	25165
fig|6666666.161614.peg.666	CDS	gi_957788176_gb_LMYF01000004_1_Hypsibius_dujardini_scaffold4	26894	25167	1728	Glucose-methanol-choline (GMC) oxidoreductase:NAD binding site	Respiratory dehydrogenases 1	25167	26894
fig|6666666.161614.peg.667	CDS	gi_957788176_gb_LMYF01000004_1_Hypsibius_dujardini_scaffold4	27316	26897	420	hypothetical protein	- none -	26897	27316
fig|6666666.161614.peg.668	CDS	gi_957788176_gb_LMYF01000004_1_Hypsibius_dujardini_scaffold4	28176	27313	864	hypothetical protein	- none -	27313	28176
fig|6666666.161614.peg.669	CDS	gi_957788176_gb_LMYF01000004_1_Hypsibius_dujardini_scaffold4	28872	28177	696	Glucosamine-6-phosphate deaminase (EC 3.5.99.6)	Chitin and N-acetylglucosamine utilization, Sialic Acid Metabolism	28177	28872
fig|6666666.161614.peg.670	CDS	gi_957788176_gb_LMYF01000004_1_Hypsibius_dujardini_scaffold4	29933	28911	1023	5-methyltetrahydropteroyltriglutamate--homocysteine methyltransferase (EC 2.1.1.14)	Methionine Biosynthesis	28911	29933
fig|6666666.161614.peg.671	CDS	gi_957788176_gb_LMYF01000004_1_Hypsibius_dujardini_scaffold4	30781	29957	825	UPF0309 protein SCO4393	- none -	29957	30781
fig|6666666.161614.peg.672	CDS	gi_957788176_gb_LMYF01000004_1_Hypsibius_dujardini_scaffold4	31643	30738	906	Glucokinase (EC 2.7.1.2)	Entner-Doudoroff Pathway, Glycolysis and Gluconeogenesis	30738	31643
fig|6666666.161614.peg.673	CDS	gi_957788176_gb_LMYF01000004_1_Hypsibius_dujardini_scaffold4	32433	31654	780	3-oxoacyl-[acyl-carrier protein] reductase (EC 1.1.1.100)	Fatty Acid Biosynthesis FASII	31654	32433
fig|6666666.161614.peg.674	CDS	gi_957788176_gb_LMYF01000004_1_Hypsibius_dujardini_scaffold4	33614	32433	1182	Myo-inositol 2-dehydrogenase (EC 1.1.1.18)	- none -	32433	33614
fig|6666666.161614.peg.675	CDS	gi_957788176_gb_LMYF01000004_1_Hypsibius_dujardini_scaffold4	34812	33640	1173	FIG00897116: hypothetical protein	- none -	33640	34812
fig|6666666.161614.peg.676	CDS	gi_957788176_gb_LMYF01000004_1_Hypsibius_dujardini_scaffold4	36289	34838	1452	hypothetical protein	- none -	34838	36289
fig|6666666.161614.peg.677	CDS	gi_957788176_gb_LMYF01000004_1_Hypsibius_dujardini_scaffold4	38299	36305	1995	hypothetical protein	- none -	36305	38299
fig|6666666.161614.peg.678	CDS	gi_957788176_gb_LMYF01000004_1_Hypsibius_dujardini_scaffold4	39714	38362	1353	FIG00908315: hypothetical protein	- none -	38362	39714
fig|6666666.161614.peg.679	CDS	gi_957788176_gb_LMYF01000004_1_Hypsibius_dujardini_scaffold4	41297	39726	1572	FIG00908315: hypothetical protein	- none -	39726	41297
fig|6666666.161614.peg.680	CDS	gi_957788176_gb_LMYF01000004_1_Hypsibius_dujardini_scaffold4	41281	41424	144	hypothetical protein	- none -	41281	41424
fig|6666666.161614.peg.681	CDS	gi_957788176_gb_LMYF01000004_1_Hypsibius_dujardini_scaffold4	42891	41437	1455	Glycosyl hydrolase	- none -	41437	42891
fig|6666666.161614.peg.682	CDS	gi_957788176_gb_LMYF01000004_1_Hypsibius_dujardini_scaffold4	44357	42921	1437	Glucan endo-1,6-beta-glucosidase( EC:3.2.1.75 )	- none -	42921	44357
fig|6666666.161614.peg.683	CDS	gi_957788176_gb_LMYF01000004_1_Hypsibius_dujardini_scaffold4	47724	44416	3309	hypothetical protein	- none -	44416	47724
fig|6666666.161614.peg.684	CDS	gi_957788176_gb_LMYF01000004_1_Hypsibius_dujardini_scaffold4	48681	47833	849	hypothetical protein	- none -	47833	48681
fig|6666666.161614.peg.685	CDS	gi_957788176_gb_LMYF01000004_1_Hypsibius_dujardini_scaffold4	50231	48750	1482	putative outer membrane protein, probably involved in nutrient binding	- none -	48750	50231
fig|6666666.161614.peg.686	CDS	gi_957788176_gb_LMYF01000004_1_Hypsibius_dujardini_scaffold4	53680	50294	3387	TonB-dependent receptor	Ton and Tol transport systems	50294	53680
fig|6666666.161614.peg.687	CDS	gi_957788176_gb_LMYF01000004_1_Hypsibius_dujardini_scaffold4	54947	53835	1113	putative anti-sigma factor	- none -	53835	54947
fig|6666666.161614.peg.688	CDS	gi_957788176_gb_LMYF01000004_1_Hypsibius_dujardini_scaffold4	55604	55011	594	RNA polymerase ECF-type sigma factor	- none -	55011	55604
fig|6666666.161614.rna.12	RNA	gi_957788176_gb_LMYF01000004_1_Hypsibius_dujardini_scaffold4	55701	55774	74	tRNA-Met-CAT	- none -	55701	55774
fig|6666666.161614.peg.689	CDS	gi_957788176_gb_LMYF01000004_1_Hypsibius_dujardini_scaffold4	55853	55978	126	hypothetical protein	- none -	55853	55978
fig|6666666.161614.peg.690	CDS	gi_957788176_gb_LMYF01000004_1_Hypsibius_dujardini_scaffold4	55984	56709	726	hypothetical protein	- none -	55984	56709
fig|6666666.161614.peg.691	CDS	gi_957788176_gb_LMYF01000004_1_Hypsibius_dujardini_scaffold4	56811	58001	1191	GTP-binding protein HflX	Hfl operon	56811	58001
fig|6666666.161614.peg.692	CDS	gi_957788176_gb_LMYF01000004_1_Hypsibius_dujardini_scaffold4	58044	58406	363	Ferredoxin	Soluble cytochromes and functionally related electron carriers	58044	58406
fig|6666666.161614.rna.13	RNA	gi_957788176_gb_LMYF01000004_1_Hypsibius_dujardini_scaffold4	58522	58595	74	tRNA-Asn-GTT	- none -	58522	58595
fig|6666666.161614.peg.693	CDS	gi_957788176_gb_LMYF01000004_1_Hypsibius_dujardini_scaffold4	58666	58785	120	hypothetical protein	- none -	58666	58785
fig|6666666.161614.peg.694	CDS	gi_957788176_gb_LMYF01000004_1_Hypsibius_dujardini_scaffold4	58893	60056	1164	Integrase	- none -	58893	60056
fig|6666666.161614.peg.695	CDS	gi_957788176_gb_LMYF01000004_1_Hypsibius_dujardini_scaffold4	60466	60858	393	hypothetical protein	- none -	60466	60858
fig|6666666.161614.peg.696	CDS	gi_957788176_gb_LMYF01000004_1_Hypsibius_dujardini_scaffold4	60877	61260	384	hypothetical protein	- none -	60877	61260
fig|6666666.161614.peg.697	CDS	gi_957788176_gb_LMYF01000004_1_Hypsibius_dujardini_scaffold4	61537	61710	174	hypothetical protein	- none -	61537	61710
fig|6666666.161614.peg.698	CDS	gi_957788176_gb_LMYF01000004_1_Hypsibius_dujardini_scaffold4	62908	62003	906	alcohol dehydrogenase, zinc containing	- none -	62003	62908
fig|6666666.161614.peg.699	CDS	gi_957788176_gb_LMYF01000004_1_Hypsibius_dujardini_scaffold4	66169	63827	2343	Multicopper oxidase	Copper homeostasis	63827	66169
fig|6666666.161614.peg.700	CDS	gi_957788176_gb_LMYF01000004_1_Hypsibius_dujardini_scaffold4	66645	66199	447	Probable Co/Zn/Cd efflux system membrane fusion protein	Cobalt-zinc-cadmium resistance	66199	66645
fig|6666666.161614.peg.701	CDS	gi_957788176_gb_LMYF01000004_1_Hypsibius_dujardini_scaffold4	67062	66850	213	FIG00909041: hypothetical protein	- none -	66850	67062
fig|6666666.161614.peg.702	CDS	gi_957788176_gb_LMYF01000004_1_Hypsibius_dujardini_scaffold4	67227	67075	153	hypothetical protein	- none -	67075	67227
fig|6666666.161614.peg.703	CDS	gi_957788176_gb_LMYF01000004_1_Hypsibius_dujardini_scaffold4	68795	67380	1416	hypothetical protein	- none -	67380	68795
fig|6666666.161614.peg.704	CDS	gi_957788176_gb_LMYF01000004_1_Hypsibius_dujardini_scaffold4	70031	69057	975	Permease of the drug/metabolite transporter (DMT) superfamily	Queuosine-Archaeosine Biosynthesis	69057	70031
fig|6666666.161614.peg.705	CDS	gi_957788176_gb_LMYF01000004_1_Hypsibius_dujardini_scaffold4	70266	70033	234	hypothetical protein	- none -	70033	70266
fig|6666666.161614.peg.706	CDS	gi_957788176_gb_LMYF01000004_1_Hypsibius_dujardini_scaffold4	72202	70862	1341	outer membrane efflux protein	- none -	70862	72202
fig|6666666.161614.peg.707	CDS	gi_957788176_gb_LMYF01000004_1_Hypsibius_dujardini_scaffold4	75326	72222	3105	RND multidrug efflux transporter; Acriflavin resistance protein	- none -	72222	75326
fig|6666666.161614.peg.708	CDS	gi_957788176_gb_LMYF01000004_1_Hypsibius_dujardini_scaffold4	76407	75331	1077	Probable Co/Zn/Cd efflux system membrane fusion protein	Cobalt-zinc-cadmium resistance	75331	76407
fig|6666666.161614.peg.709	CDS	gi_957788176_gb_LMYF01000004_1_Hypsibius_dujardini_scaffold4	79097	76833	2265	Lead, cadmium, zinc and mercury transporting ATPase (EC 3.6.3.3) (EC 3.6.3.5); Copper-translocating P-type ATPase (EC 3.6.3.4)	Copper Transport System, Copper homeostasis	76833	79097
fig|6666666.161614.peg.710	CDS	gi_957788176_gb_LMYF01000004_1_Hypsibius_dujardini_scaffold4	79746	79177	570	Transcriptional regulator, AraC family	- none -	79177	79746
fig|6666666.161614.peg.711	CDS	gi_957788176_gb_LMYF01000004_1_Hypsibius_dujardini_scaffold4	80375	79833	543	hypothetical protein	- none -	79833	80375
fig|6666666.161614.peg.712	CDS	gi_957788176_gb_LMYF01000004_1_Hypsibius_dujardini_scaffold4	80618	80782	165	hypothetical protein	- none -	80618	80782
fig|6666666.161614.peg.713	CDS	gi_957788176_gb_LMYF01000004_1_Hypsibius_dujardini_scaffold4	81114	81368	255	hypothetical protein	- none -	81114	81368
fig|6666666.161614.peg.714	CDS	gi_957788176_gb_LMYF01000004_1_Hypsibius_dujardini_scaffold4	81484	81927	444	Probable Co/Zn/Cd efflux system membrane fusion protein	Cobalt-zinc-cadmium resistance	81484	81927
fig|6666666.161614.peg.715	CDS	gi_957788176_gb_LMYF01000004_1_Hypsibius_dujardini_scaffold4	82045	82572	528	Probable Co/Zn/Cd efflux system membrane fusion protein	Cobalt-zinc-cadmium resistance	82045	82572
fig|6666666.161614.peg.716	CDS	gi_957788176_gb_LMYF01000004_1_Hypsibius_dujardini_scaffold4	82589	83878	1290	Cobalt-zinc-cadmium resistance protein CzcA; Cation efflux system protein CusA	Cobalt-zinc-cadmium resistance, Cobalt-zinc-cadmium resistance	82589	83878
fig|6666666.161614.peg.717	CDS	gi_957788176_gb_LMYF01000004_1_Hypsibius_dujardini_scaffold4	83881	85806	1926	Cobalt-zinc-cadmium resistance protein CzcA; Cation efflux system protein CusA	Cobalt-zinc-cadmium resistance, Cobalt-zinc-cadmium resistance	83881	85806
fig|6666666.161614.peg.718	CDS	gi_957788176_gb_LMYF01000004_1_Hypsibius_dujardini_scaffold4	85793	87046	1254	Heavy metal RND efflux outer membrane protein, CzcC family	Cobalt-zinc-cadmium resistance	85793	87046
fig|6666666.161614.peg.719	CDS	gi_957788176_gb_LMYF01000004_1_Hypsibius_dujardini_scaffold4	87058	88560	1503	Multicopper oxidase	Copper homeostasis	87058	88560
fig|6666666.161614.peg.720	CDS	gi_957788176_gb_LMYF01000004_1_Hypsibius_dujardini_scaffold4	88813	89937	1125	Probable Co/Zn/Cd efflux system membrane fusion protein	Cobalt-zinc-cadmium resistance	88813	89937
fig|6666666.161614.peg.721	CDS	gi_957788176_gb_LMYF01000004_1_Hypsibius_dujardini_scaffold4	89940	91136	1197	Probable Co/Zn/Cd efflux system membrane fusion protein	Cobalt-zinc-cadmium resistance	89940	91136
fig|6666666.161614.peg.722	CDS	gi_957788176_gb_LMYF01000004_1_Hypsibius_dujardini_scaffold4	91157	91726	570	hypothetical protein	- none -	91157	91726
fig|6666666.161614.peg.723	CDS	gi_957788176_gb_LMYF01000004_1_Hypsibius_dujardini_scaffold4	91731	93881	2151	Lead, cadmium, zinc and mercury transporting ATPase (EC 3.6.3.3) (EC 3.6.3.5); Copper-translocating P-type ATPase (EC 3.6.3.4)	Copper Transport System, Copper homeostasis	91731	93881
fig|6666666.161614.peg.724	CDS	gi_957788176_gb_LMYF01000004_1_Hypsibius_dujardini_scaffold4	94044	93919	126	hypothetical protein	- none -	93919	94044
fig|6666666.161614.peg.725	CDS	gi_957788176_gb_LMYF01000004_1_Hypsibius_dujardini_scaffold4	94211	94068	144	hypothetical protein	- none -	94068	94211
fig|6666666.161614.peg.726	CDS	gi_957788176_gb_LMYF01000004_1_Hypsibius_dujardini_scaffold4	94336	95091	756	hypothetical protein	- none -	94336	95091
fig|6666666.161614.peg.727	CDS	gi_957788176_gb_LMYF01000004_1_Hypsibius_dujardini_scaffold4	95117	95521	405	hypothetical protein	- none -	95117	95521
fig|6666666.161614.peg.728	CDS	gi_957788176_gb_LMYF01000004_1_Hypsibius_dujardini_scaffold4	95518	95733	216	hypothetical protein	- none -	95518	95733
fig|6666666.161614.peg.729	CDS	gi_957788176_gb_LMYF01000004_1_Hypsibius_dujardini_scaffold4	95737	95922	186	hypothetical protein	- none -	95737	95922
fig|6666666.161614.peg.730	CDS	gi_957788176_gb_LMYF01000004_1_Hypsibius_dujardini_scaffold4	96341	96733	393	hypothetical protein	- none -	96341	96733
fig|6666666.161614.peg.731	CDS	gi_957788176_gb_LMYF01000004_1_Hypsibius_dujardini_scaffold4	96844	97497	654	hypothetical protein	- none -	96844	97497
fig|6666666.161614.peg.732	CDS	gi_957788176_gb_LMYF01000004_1_Hypsibius_dujardini_scaffold4	97458	98240	783	Sensory box histidine kinase	- none -	97458	98240
fig|6666666.161614.peg.733	CDS	gi_957788176_gb_LMYF01000004_1_Hypsibius_dujardini_scaffold4	98248	98880	633	DNA-binding response regulator, LuxR family	- none -	98248	98880
fig|6666666.161614.peg.734	CDS	gi_957788176_gb_LMYF01000004_1_Hypsibius_dujardini_scaffold4	99338	99123	216	hypothetical protein	- none -	99123	99338
fig|6666666.161614.peg.735	CDS	gi_957788176_gb_LMYF01000004_1_Hypsibius_dujardini_scaffold4	100251	99421	831	hypothetical protein	- none -	99421	100251
fig|6666666.161614.peg.736	CDS	gi_957788176_gb_LMYF01000004_1_Hypsibius_dujardini_scaffold4	100725	100594	132	hypothetical protein	- none -	100594	100725
fig|6666666.161614.peg.737	CDS	gi_957788176_gb_LMYF01000004_1_Hypsibius_dujardini_scaffold4	101006	101887	882	Thioredoxin	- none -	101006	101887
fig|6666666.161614.peg.738	CDS	gi_957788176_gb_LMYF01000004_1_Hypsibius_dujardini_scaffold4	102206	102069	138	hypothetical protein	- none -	102069	102206
fig|6666666.161614.peg.739	CDS	gi_957788176_gb_LMYF01000004_1_Hypsibius_dujardini_scaffold4	102465	105311	2847	TonB-dependent receptor	Ton and Tol transport systems	102465	105311
fig|6666666.161614.peg.740	CDS	gi_957788176_gb_LMYF01000004_1_Hypsibius_dujardini_scaffold4	105326	106669	1344	hypothetical protein	- none -	105326	106669
fig|6666666.161614.peg.741	CDS	gi_957788176_gb_LMYF01000004_1_Hypsibius_dujardini_scaffold4	107066	106725	342	hypothetical protein	- none -	106725	107066
fig|6666666.161614.peg.742	CDS	gi_957788176_gb_LMYF01000004_1_Hypsibius_dujardini_scaffold4	107658	108710	1053	Oxidoreductase	- none -	107658	108710
fig|6666666.161614.peg.743	CDS	gi_957788176_gb_LMYF01000004_1_Hypsibius_dujardini_scaffold4	108766	109584	819	Type III secretion thermoregulatory protein (LcrF,VirF,transcription regulation of virulence plasmid)	- none -	108766	109584
fig|6666666.161614.peg.744	CDS	gi_957788176_gb_LMYF01000004_1_Hypsibius_dujardini_scaffold4	109682	110305	624	hypothetical protein	- none -	109682	110305
fig|6666666.161614.peg.745	CDS	gi_957788176_gb_LMYF01000004_1_Hypsibius_dujardini_scaffold4	111894	110623	1272	Na+/H+ antiporter NhaD type	NhaA, NhaD and Sodium-dependent phosphate transporters	110623	111894
fig|6666666.161614.peg.746	CDS	gi_957788176_gb_LMYF01000004_1_Hypsibius_dujardini_scaffold4	112367	113788	1422	Na+-driven multidrug efflux pump	- none -	112367	113788
fig|6666666.161614.peg.747	CDS	gi_957788176_gb_LMYF01000004_1_Hypsibius_dujardini_scaffold4	113872	114915	1044	membrane protein, putative	- none -	113872	114915
fig|6666666.161614.peg.748	CDS	gi_957788176_gb_LMYF01000004_1_Hypsibius_dujardini_scaffold4	115105	115830	726	hypothetical protein	- none -	115105	115830
fig|6666666.161614.peg.749	CDS	gi_957788176_gb_LMYF01000004_1_Hypsibius_dujardini_scaffold4	117079	115898	1182	Mn2+/Fe2+ transporter, NRAMP family	- none -	115898	117079
fig|6666666.161614.peg.750	CDS	gi_957788176_gb_LMYF01000004_1_Hypsibius_dujardini_scaffold4	117795	117076	720	Lactam utilization protein LamB	EC699-706	117076	117795
fig|6666666.161614.peg.751	CDS	gi_957788176_gb_LMYF01000004_1_Hypsibius_dujardini_scaffold4	118777	117785	993	Allophanate hydrolase 2 subunit 2 (EC 3.5.1.54)	EC699-706	117785	118777
fig|6666666.161614.peg.752	CDS	gi_957788176_gb_LMYF01000004_1_Hypsibius_dujardini_scaffold4	119468	118758	711	Allophanate hydrolase 2 subunit 1 (EC 3.5.1.54)	EC699-706	118758	119468
fig|6666666.161614.peg.753	CDS	gi_957788176_gb_LMYF01000004_1_Hypsibius_dujardini_scaffold4	119510	120541	1032	possible Fe-S oxidoreductase, SAM radical superfamily	- none -	119510	120541
fig|6666666.161614.peg.754	CDS	gi_957788176_gb_LMYF01000004_1_Hypsibius_dujardini_scaffold4	120560	121066	507	hypothetical protein	- none -	120560	121066
fig|6666666.161614.peg.755	CDS	gi_957788176_gb_LMYF01000004_1_Hypsibius_dujardini_scaffold4	121347	121700	354	hypothetical protein	- none -	121347	121700
fig|6666666.161614.peg.756	CDS	gi_957788176_gb_LMYF01000004_1_Hypsibius_dujardini_scaffold4	121854	122309	456	Transcriptional regulator, MarR family	- none -	121854	122309
fig|6666666.161614.peg.757	CDS	gi_957788176_gb_LMYF01000004_1_Hypsibius_dujardini_scaffold4	122379	123920	1542	COG1649 predicted glycoside hydrolase	- none -	122379	123920
fig|6666666.161614.peg.758	CDS	gi_957788176_gb_LMYF01000004_1_Hypsibius_dujardini_scaffold4	123999	125216	1218	DegT/DnrJ/EryC1/StrS aminotransferase	- none -	123999	125216
fig|6666666.161614.peg.759	CDS	gi_957788176_gb_LMYF01000004_1_Hypsibius_dujardini_scaffold4	125227	125769	543	hypothetical protein	- none -	125227	125769
fig|6666666.161614.peg.760	CDS	gi_957788176_gb_LMYF01000004_1_Hypsibius_dujardini_scaffold4	125836	127017	1182	Na+/H+ antiporter NhaA type	NhaA, NhaD and Sodium-dependent phosphate transporters	125836	127017
fig|6666666.161614.peg.761	CDS	gi_957788176_gb_LMYF01000004_1_Hypsibius_dujardini_scaffold4	127395	127021	375	hypothetical protein	- none -	127021	127395
fig|6666666.161614.peg.762	CDS	gi_957788176_gb_LMYF01000004_1_Hypsibius_dujardini_scaffold4	127491	128981	1491	RNA polymerase sigma-54 factor RpoN	Transcription initiation, bacterial sigma factors	127491	128981
fig|6666666.161614.peg.763	CDS	gi_957788176_gb_LMYF01000004_1_Hypsibius_dujardini_scaffold4	129182	130558	1377	Probable poly(beta-D-mannuronate) O-acetylase (EC 2.3.1.-)	- none -	129182	130558
fig|6666666.161614.peg.764	CDS	gi_957788176_gb_LMYF01000004_1_Hypsibius_dujardini_scaffold4	130584	131852	1269	Conserved protein	- none -	130584	131852
fig|6666666.161614.peg.765	CDS	gi_957788176_gb_LMYF01000004_1_Hypsibius_dujardini_scaffold4	132285	131854	432	hypothetical protein	- none -	131854	132285
fig|6666666.161614.peg.766	CDS	gi_957788176_gb_LMYF01000004_1_Hypsibius_dujardini_scaffold4	132411	133103	693	hypothetical protein	- none -	132411	133103
fig|6666666.161614.peg.767	CDS	gi_957788176_gb_LMYF01000004_1_Hypsibius_dujardini_scaffold4	133208	134239	1032	RecA protein	DNA repair, bacterial, DNA repair, bacterial RecFOR pathway, DNA repair, bacterial UmuCD system, DNA repair system including RecA, MutS and a hypothetical protein, RecA and RecX	133208	134239
fig|6666666.161614.peg.768	CDS	gi_957788176_gb_LMYF01000004_1_Hypsibius_dujardini_scaffold4	134450	134887	438	hypothetical protein	- none -	134450	134887
fig|6666666.161614.peg.769	CDS	gi_957788176_gb_LMYF01000004_1_Hypsibius_dujardini_scaffold4	134920	135465	546	hypothetical protein	- none -	134920	135465
fig|6666666.161614.peg.770	CDS	gi_957788176_gb_LMYF01000004_1_Hypsibius_dujardini_scaffold4	135538	135993	456	Methylglyoxal synthase (EC 4.2.3.3)	Methylglyoxal Metabolism	135538	135993
fig|6666666.161614.peg.771	CDS	gi_957788176_gb_LMYF01000004_1_Hypsibius_dujardini_scaffold4	138385	135995	2391	hypothetical protein	- none -	135995	138385
fig|6666666.161614.peg.772	CDS	gi_957788176_gb_LMYF01000004_1_Hypsibius_dujardini_scaffold4	138535	140574	2040	Excinuclease ABC subunit B	DNA repair, UvrABC system	138535	140574
fig|6666666.161614.peg.773	CDS	gi_957788176_gb_LMYF01000004_1_Hypsibius_dujardini_scaffold4	140730	140966	237	hypothetical protein	- none -	140730	140966
fig|6666666.161614.peg.774	CDS	gi_957788176_gb_LMYF01000004_1_Hypsibius_dujardini_scaffold4	141090	143945	2856	DNA polymerase I (EC 2.7.7.7)	DNA Repair Base Excision	141090	143945
fig|6666666.161614.peg.775	CDS	gi_957788176_gb_LMYF01000004_1_Hypsibius_dujardini_scaffold4	143955	144707	753	sterol desaturase family protein	- none -	143955	144707
fig|6666666.161614.peg.776	CDS	gi_957788176_gb_LMYF01000004_1_Hypsibius_dujardini_scaffold4	144778	145431	654	Thioredoxin	- none -	144778	145431
fig|6666666.161614.peg.777	CDS	gi_957788176_gb_LMYF01000004_1_Hypsibius_dujardini_scaffold4	145428	146345	918	Tagatose-6-phosphate kinase (EC 2.7.1.144) / 1-phosphofructokinase (EC 2.7.1.56)	Lactose and Galactose Uptake and Utilization	145428	146345
fig|6666666.161614.peg.778	CDS	gi_957788176_gb_LMYF01000004_1_Hypsibius_dujardini_scaffold4	146349	146726	378	SEC-independent protein translocase protein TATC	- none -	146349	146726
fig|6666666.161614.peg.779	CDS	gi_957788176_gb_LMYF01000004_1_Hypsibius_dujardini_scaffold4	146822	147481	660	hypothetical protein	- none -	146822	147481
fig|6666666.161614.peg.780	CDS	gi_957788176_gb_LMYF01000004_1_Hypsibius_dujardini_scaffold4	148404	147529	876	Thiosulfate sulfurtransferase, rhodanese (EC 2.8.1.1)	- none -	147529	148404
fig|6666666.161614.peg.781	CDS	gi_957788176_gb_LMYF01000004_1_Hypsibius_dujardini_scaffold4	149480	148503	978	Bifunctional protein: zinc-containing alcohol dehydrogenase; quinone oxidoreductase ( NADPH:quinone reductase) (EC 1.1.1.-); Similar to arginate lyase	- none -	148503	149480
fig|6666666.161614.peg.782	CDS	gi_957788176_gb_LMYF01000004_1_Hypsibius_dujardini_scaffold4	150051	149581	471	DUF1801 domain-containing protein	- none -	149581	150051
fig|6666666.161614.peg.783	CDS	gi_957788176_gb_LMYF01000004_1_Hypsibius_dujardini_scaffold4	150495	150064	432	hypothetical protein	- none -	150064	150495
fig|6666666.161614.peg.784	CDS	gi_957788176_gb_LMYF01000004_1_Hypsibius_dujardini_scaffold4	151094	150591	504	hypothetical protein	- none -	150591	151094
fig|6666666.161614.peg.785	CDS	gi_957788176_gb_LMYF01000004_1_Hypsibius_dujardini_scaffold4	151495	151106	390	Glyoxalase family protein	- none -	151106	151495
fig|6666666.161614.peg.786	CDS	gi_957788176_gb_LMYF01000004_1_Hypsibius_dujardini_scaffold4	152018	151503	516	Ankyrin repeat domain protein	- none -	151503	152018
fig|6666666.161614.peg.787	CDS	gi_957788176_gb_LMYF01000004_1_Hypsibius_dujardini_scaffold4	152615	152085	531	hypothetical protein	- none -	152085	152615
fig|6666666.161614.peg.788	CDS	gi_957788176_gb_LMYF01000004_1_Hypsibius_dujardini_scaffold4	153100	152672	429	hypothetical protein	- none -	152672	153100
fig|6666666.161614.peg.789	CDS	gi_957788176_gb_LMYF01000004_1_Hypsibius_dujardini_scaffold4	153198	154268	1071	Autolysin sensor kinase (EC 2.7.3.-)	- none -	153198	154268
fig|6666666.161614.peg.790	CDS	gi_957788176_gb_LMYF01000004_1_Hypsibius_dujardini_scaffold4	154270	155025	756	Two-component system response regulator	- none -	154270	155025
fig|6666666.161614.peg.791	CDS	gi_957788176_gb_LMYF01000004_1_Hypsibius_dujardini_scaffold4	155166	157505	2340	hypothetical protein	- none -	155166	157505
fig|6666666.161614.peg.792	CDS	gi_957788176_gb_LMYF01000004_1_Hypsibius_dujardini_scaffold4	157999	157601	399	hypothetical protein	- none -	157601	157999
fig|6666666.161614.peg.793	CDS	gi_957788176_gb_LMYF01000004_1_Hypsibius_dujardini_scaffold4	158559	158044	516	hypothetical protein	- none -	158044	158559
fig|6666666.161614.peg.794	CDS	gi_957788176_gb_LMYF01000004_1_Hypsibius_dujardini_scaffold4	158906	158556	351	hypothetical protein	- none -	158556	158906
fig|6666666.161614.peg.795	CDS	gi_957788176_gb_LMYF01000004_1_Hypsibius_dujardini_scaffold4	159520	158948	573	hypothetical protein	- none -	158948	159520
fig|6666666.161614.peg.796	CDS	gi_957788176_gb_LMYF01000004_1_Hypsibius_dujardini_scaffold4	162465	159601	2865	hypothetical protein	- none -	159601	162465
fig|6666666.161614.peg.797	CDS	gi_957788176_gb_LMYF01000004_1_Hypsibius_dujardini_scaffold4	162628	163203	576	hypothetical protein	- none -	162628	163203
fig|6666666.161614.peg.798	CDS	gi_957788176_gb_LMYF01000004_1_Hypsibius_dujardini_scaffold4	163278	165011	1734	Oligoendopeptidase F (EC 3.4.24.-)	- none -	163278	165011
fig|6666666.161614.peg.799	CDS	gi_957788176_gb_LMYF01000004_1_Hypsibius_dujardini_scaffold4	165599	165183	417	Zinc uptake regulation protein ZUR	Glycyl-tRNA synthetase containing cluster, Oxidative stress	165183	165599
fig|6666666.161614.peg.800	CDS	gi_957788176_gb_LMYF01000004_1_Hypsibius_dujardini_scaffold4	166203	165610	594	electron transport protein SCO1/SenC	- none -	165610	166203
fig|6666666.161614.peg.801	CDS	gi_957788176_gb_LMYF01000004_1_Hypsibius_dujardini_scaffold4	166265	166708	444	hypothetical protein	- none -	166265	166708
fig|6666666.161614.peg.802	CDS	gi_957788176_gb_LMYF01000004_1_Hypsibius_dujardini_scaffold4	166747	167169	423	L-asparaginase (EC 3.5.1.1)	Glutamine, Glutamate, Aspartate and Asparagine Biosynthesis	166747	167169
fig|6666666.161614.peg.803	CDS	gi_957788176_gb_LMYF01000004_1_Hypsibius_dujardini_scaffold4	167573	167166	408	hypothetical protein	- none -	167166	167573
fig|6666666.161614.peg.804	CDS	gi_957788176_gb_LMYF01000004_1_Hypsibius_dujardini_scaffold4	167894	167670	225	hypothetical protein	- none -	167670	167894
fig|6666666.161614.peg.805	CDS	gi_957788176_gb_LMYF01000004_1_Hypsibius_dujardini_scaffold4	168725	167955	771	Lyzozyme M1 (1,4-beta-N-acetylmuramidase) (EC 3.2.1.17)	- none -	167955	168725
fig|6666666.161614.peg.806	CDS	gi_957788176_gb_LMYF01000004_1_Hypsibius_dujardini_scaffold4	169614	168820	795	hypothetical protein	- none -	168820	169614
fig|6666666.161614.peg.807	CDS	gi_957788176_gb_LMYF01000004_1_Hypsibius_dujardini_scaffold4	169882	170226	345	hypothetical protein	- none -	169882	170226
fig|6666666.161614.peg.808	CDS	gi_957788176_gb_LMYF01000004_1_Hypsibius_dujardini_scaffold4	170316	171527	1212	hypothetical protein	- none -	170316	171527
fig|6666666.161614.peg.809	CDS	gi_957788176_gb_LMYF01000004_1_Hypsibius_dujardini_scaffold4	171520	172236	717	Two-component system response regulator	- none -	171520	172236
fig|6666666.161614.peg.810	CDS	gi_957788176_gb_LMYF01000004_1_Hypsibius_dujardini_scaffold4	174602	172239	2364	ATP-dependent DNA helicase UvrD/PcrA	DNA repair, bacterial UvrD and related helicases	172239	174602
fig|6666666.161614.peg.811	CDS	gi_957788176_gb_LMYF01000004_1_Hypsibius_dujardini_scaffold4	176280	174727	1554	hypothetical protein	- none -	174727	176280
fig|6666666.161614.peg.812	CDS	gi_957788176_gb_LMYF01000004_1_Hypsibius_dujardini_scaffold4	176721	177209	489	L-asparaginase (EC 3.5.1.1)	Glutamine, Glutamate, Aspartate and Asparagine Biosynthesis	176721	177209
fig|6666666.161614.peg.813	CDS	gi_957788176_gb_LMYF01000004_1_Hypsibius_dujardini_scaffold4	178195	177284	912	hypothetical protein	- none -	177284	178195
fig|6666666.161614.peg.814	CDS	gi_957788176_gb_LMYF01000004_1_Hypsibius_dujardini_scaffold4	178859	178242	618	hypothetical protein	- none -	178242	178859
fig|6666666.161614.peg.815	CDS	gi_957788176_gb_LMYF01000004_1_Hypsibius_dujardini_scaffold4	180081	178891	1191	hypothetical protein	- none -	178891	180081
fig|6666666.161614.peg.816	CDS	gi_957788176_gb_LMYF01000004_1_Hypsibius_dujardini_scaffold4	180350	180577	228	hypothetical protein	- none -	180350	180577
fig|6666666.161614.peg.817	CDS	gi_957788176_gb_LMYF01000004_1_Hypsibius_dujardini_scaffold4	180609	181577	969	molybdopterin oxidoreductase, iron-sulfur binding subunit, putative	- none -	180609	181577
fig|6666666.161614.peg.818	CDS	gi_957788176_gb_LMYF01000004_1_Hypsibius_dujardini_scaffold4	181617	182957	1341	Molybdopterin oxidoreductase (EC 1.2.7.-)	CBSS-269799.3.peg.2220	181617	182957
fig|6666666.161614.peg.819	CDS	gi_957788176_gb_LMYF01000004_1_Hypsibius_dujardini_scaffold4	183000	183953	954	hypothetical protein	- none -	183000	183953
fig|6666666.161614.peg.820	CDS	gi_957788176_gb_LMYF01000004_1_Hypsibius_dujardini_scaffold4	183985	184395	411	High-affinity iron permease	- none -	183985	184395
fig|6666666.161614.peg.821	CDS	gi_957788176_gb_LMYF01000004_1_Hypsibius_dujardini_scaffold4	184528	185376	849	hypothetical protein	- none -	184528	185376
fig|6666666.161614.peg.822	CDS	gi_957788176_gb_LMYF01000004_1_Hypsibius_dujardini_scaffold4	185456	187054	1599	Na+/H+ antiporter	- none -	185456	187054
fig|6666666.161614.peg.823	CDS	gi_957788176_gb_LMYF01000004_1_Hypsibius_dujardini_scaffold4	188016	187117	900	Flagellar motor rotation protein MotB	- none -	187117	188016
fig|6666666.161614.peg.824	CDS	gi_957788176_gb_LMYF01000004_1_Hypsibius_dujardini_scaffold4	188217	189449	1233	tetracycline resistance protein	- none -	188217	189449
fig|6666666.161614.peg.825	CDS	gi_957788176_gb_LMYF01000004_1_Hypsibius_dujardini_scaffold4	189636	191495	1860	Phosphoenolpyruvate carboxykinase [GTP] (EC 4.1.1.32)	Pyruvate metabolism I: anaplerotic reactions, PEP	189636	191495
fig|6666666.161614.peg.826	CDS	gi_957788176_gb_LMYF01000004_1_Hypsibius_dujardini_scaffold4	191601	193271	1671	Predicted cobalt transporter in Bacteroides_Porphyromonas	- none -	191601	193271
fig|6666666.161614.peg.827	CDS	gi_957788176_gb_LMYF01000004_1_Hypsibius_dujardini_scaffold4	193641	193273	369	hypothetical protein	- none -	193273	193641
fig|6666666.161614.peg.828	CDS	gi_957788176_gb_LMYF01000004_1_Hypsibius_dujardini_scaffold4	193707	194435	729	tRNA (uridine-5-oxyacetic acid methyl ester) 34 synthase	- none -	193707	194435
fig|6666666.161614.peg.829	CDS	gi_957788176_gb_LMYF01000004_1_Hypsibius_dujardini_scaffold4	194478	195200	723	Putative protein-S-isoprenylcysteine methyltransferase-like	- none -	194478	195200
fig|6666666.161614.peg.830	CDS	gi_957788176_gb_LMYF01000004_1_Hypsibius_dujardini_scaffold4	195391	195987	597	thioredoxin-related protein	- none -	195391	195987
fig|6666666.161614.peg.831	CDS	gi_957788176_gb_LMYF01000004_1_Hypsibius_dujardini_scaffold4	197283	196162	1122	Saccharopine dehydrogenase	- none -	196162	197283
fig|6666666.161614.peg.832	CDS	gi_957788176_gb_LMYF01000004_1_Hypsibius_dujardini_scaffold4	198208	197417	792	hypothetical protein	- none -	197417	198208
fig|6666666.161614.peg.833	CDS	gi_957788176_gb_LMYF01000004_1_Hypsibius_dujardini_scaffold4	198378	198923	546	RNA polymerase sigma-54 factor RpoN	Transcription initiation, bacterial sigma factors	198378	198923
fig|6666666.161614.peg.834	CDS	gi_957788176_gb_LMYF01000004_1_Hypsibius_dujardini_scaffold4	198929	199237	309	hypothetical protein	- none -	198929	199237
fig|6666666.161614.peg.835	CDS	gi_957788176_gb_LMYF01000004_1_Hypsibius_dujardini_scaffold4	199240	199761	522	hypothetical protein	- none -	199240	199761
fig|6666666.161614.peg.836	CDS	gi_957788176_gb_LMYF01000004_1_Hypsibius_dujardini_scaffold4	199863	201029	1167	Probable cytochrome-c peroxidase (EC 1.11.1.5)	- none -	199863	201029
fig|6666666.161614.peg.837	CDS	gi_957788176_gb_LMYF01000004_1_Hypsibius_dujardini_scaffold4	201001	201192	192	hypothetical protein	- none -	201001	201192
fig|6666666.161614.peg.838	CDS	gi_957788176_gb_LMYF01000004_1_Hypsibius_dujardini_scaffold4	201266	202213	948	Ferric siderophore transport system, periplasmic binding protein TonB	Hemin transport system, Ton and Tol transport systems	201266	202213
fig|6666666.161614.peg.839	CDS	gi_957788176_gb_LMYF01000004_1_Hypsibius_dujardini_scaffold4	204192	202306	1887	Chaperone protein HtpG	Protein chaperones	202306	204192
fig|6666666.161614.peg.840	CDS	gi_957788176_gb_LMYF01000004_1_Hypsibius_dujardini_scaffold4	205342	204290	1053	MloA protein, putative	- none -	204290	205342
fig|6666666.161614.peg.841	CDS	gi_957788176_gb_LMYF01000004_1_Hypsibius_dujardini_scaffold4	206556	205468	1089	Chitinase (EC 3.2.1.14)	Chitin and N-acetylglucosamine utilization	205468	206556
fig|6666666.161614.peg.842	CDS	gi_957788176_gb_LMYF01000004_1_Hypsibius_dujardini_scaffold4	207312	206653	660	conserved hypothetical protein	- none -	206653	207312
fig|6666666.161614.peg.843	CDS	gi_957788176_gb_LMYF01000004_1_Hypsibius_dujardini_scaffold4	207567	207319	249	hypothetical protein	- none -	207319	207567
fig|6666666.161614.peg.844	CDS	gi_957788176_gb_LMYF01000004_1_Hypsibius_dujardini_scaffold4	209728	207683	2046	Penicillin amidase family protein	- none -	207683	209728
fig|6666666.161614.peg.845	CDS	gi_957788176_gb_LMYF01000004_1_Hypsibius_dujardini_scaffold4	211177	209843	1335	hypothetical protein	- none -	209843	211177
fig|6666666.161614.peg.846	CDS	gi_957788176_gb_LMYF01000004_1_Hypsibius_dujardini_scaffold4	212424	211174	1251	DNA-cytosine methyltransferase (EC 2.1.1.37)	DNA repair, bacterial	211174	212424
fig|6666666.161614.peg.847	CDS	gi_957788176_gb_LMYF01000004_1_Hypsibius_dujardini_scaffold4	212636	212421	216	hypothetical protein	- none -	212421	212636
fig|6666666.161614.peg.848	CDS	gi_957788176_gb_LMYF01000004_1_Hypsibius_dujardini_scaffold4	213144	212731	414	Very-short-patch mismatch repair endonuclease (G-T specific)	DNA repair, bacterial	212731	213144
fig|6666666.161614.peg.849	CDS	gi_957788176_gb_LMYF01000004_1_Hypsibius_dujardini_scaffold4	213697	213209	489	hypothetical protein	- none -	213209	213697
fig|6666666.161614.peg.850	CDS	gi_957788176_gb_LMYF01000004_1_Hypsibius_dujardini_scaffold4	215755	213734	2022	hypothetical protein	- none -	213734	215755
fig|6666666.161614.peg.851	CDS	gi_957788176_gb_LMYF01000004_1_Hypsibius_dujardini_scaffold4	215906	216829	924	sugar-non-specific nuclease NucA homolog	- none -	215906	216829
fig|6666666.161614.peg.852	CDS	gi_957788176_gb_LMYF01000004_1_Hypsibius_dujardini_scaffold4	217274	216837	438	hypothetical protein	- none -	216837	217274
fig|6666666.161614.peg.853	CDS	gi_957788176_gb_LMYF01000004_1_Hypsibius_dujardini_scaffold4	217823	217440	384	Uncharacterized conserved protein, YTFJ B.subtilis ortholog	- none -	217440	217823
fig|6666666.161614.peg.854	CDS	gi_957788176_gb_LMYF01000004_1_Hypsibius_dujardini_scaffold4	218348	217854	495	hypothetical protein	- none -	217854	218348
fig|6666666.161614.peg.855	CDS	gi_957788176_gb_LMYF01000004_1_Hypsibius_dujardini_scaffold4	219172	218492	681	hypothetical protein	- none -	218492	219172
fig|6666666.161614.peg.856	CDS	gi_957788176_gb_LMYF01000004_1_Hypsibius_dujardini_scaffold4	219352	219224	129	hypothetical protein	- none -	219224	219352
fig|6666666.161614.peg.857	CDS	gi_957788176_gb_LMYF01000004_1_Hypsibius_dujardini_scaffold4	219391	220434	1044	Alcohol dehydrogenase (EC 1.1.1.1)	5-FCL-like protein, Butanol Biosynthesis, Glycerolipid and Glycerophospholipid Metabolism in Bacteria	219391	220434
fig|6666666.161614.peg.858	CDS	gi_957788176_gb_LMYF01000004_1_Hypsibius_dujardini_scaffold4	221057	220527	531	Dihydrofolate reductase (EC 1.5.1.3)	5-FCL-like protein, Folate Biosynthesis	220527	221057
fig|6666666.161614.peg.859	CDS	gi_957788176_gb_LMYF01000004_1_Hypsibius_dujardini_scaffold4	221886	221197	690	DNA-binding response regulator KdpE	- none -	221197	221886
fig|6666666.161614.peg.860	CDS	gi_957788176_gb_LMYF01000004_1_Hypsibius_dujardini_scaffold4	222956	221889	1068	Osmosensitive K+ channel histidine kinase KdpD (EC 2.7.3.-)	Potassium homeostasis	221889	222956
fig|6666666.161614.peg.861	CDS	gi_957788176_gb_LMYF01000004_1_Hypsibius_dujardini_scaffold4	223110	225080	1971	Kup system potassium uptake protein	Potassium homeostasis	223110	225080
fig|6666666.161614.peg.862	CDS	gi_957788176_gb_LMYF01000004_1_Hypsibius_dujardini_scaffold4	225080	225193	114	hypothetical protein	- none -	225080	225193
fig|6666666.161614.peg.863	CDS	gi_957788176_gb_LMYF01000004_1_Hypsibius_dujardini_scaffold4	225564	225196	369	hypothetical protein	- none -	225196	225564
fig|6666666.161614.peg.864	CDS	gi_957788176_gb_LMYF01000004_1_Hypsibius_dujardini_scaffold4	226413	225583	831	Branched-chain amino acid aminotransferase (EC 2.6.1.42)	Alanine biosynthesis, Branched-Chain Amino Acid Biosynthesis, Isoleucine degradation, Leucine Biosynthesis, Leucine Degradation and HMG-CoA Metabolism, Pyruvate Alanine Serine Interconversions, Valine degradation	225583	226413
fig|6666666.161614.peg.865	CDS	gi_957788176_gb_LMYF01000004_1_Hypsibius_dujardini_scaffold4	227914	226430	1485	hypothetical protein	- none -	226430	227914
fig|6666666.161614.peg.866	CDS	gi_957788176_gb_LMYF01000004_1_Hypsibius_dujardini_scaffold4	228065	228583	519	hypothetical protein	- none -	228065	228583
fig|6666666.161614.peg.867	CDS	gi_957788176_gb_LMYF01000004_1_Hypsibius_dujardini_scaffold4	228994	228635	360	cupin domain, putative	- none -	228635	228994
fig|6666666.161614.peg.868	CDS	gi_957788176_gb_LMYF01000004_1_Hypsibius_dujardini_scaffold4	230164	229001	1164	Phosphoribosylglycinamide formyltransferase 2 (EC 2.1.2.-)	De Novo Purine Biosynthesis	229001	230164
fig|6666666.161614.peg.869	CDS	gi_957788176_gb_LMYF01000004_1_Hypsibius_dujardini_scaffold4	230803	230177	627	Carbonic anhydrase (EC 4.2.1.1)	- none -	230177	230803
fig|6666666.161614.peg.870	CDS	gi_957788176_gb_LMYF01000004_1_Hypsibius_dujardini_scaffold4	231841	230819	1023	hypothetical protein	- none -	230819	231841
fig|6666666.161614.peg.871	CDS	gi_957788176_gb_LMYF01000004_1_Hypsibius_dujardini_scaffold4	232670	231882	789	hypothetical protein	- none -	231882	232670
fig|6666666.161614.peg.872	CDS	gi_957788176_gb_LMYF01000004_1_Hypsibius_dujardini_scaffold4	234183	232672	1512	ThiJ/PfpI family protein	- none -	232672	234183
fig|6666666.161614.peg.873	CDS	gi_957788176_gb_LMYF01000004_1_Hypsibius_dujardini_scaffold4	234291	234677	387	Transcriptional regulator, HxlR family	- none -	234291	234677
fig|6666666.161614.peg.874	CDS	gi_957788176_gb_LMYF01000004_1_Hypsibius_dujardini_scaffold4	234661	235275	615	Peptidase, M23/M37 family	- none -	234661	235275
fig|6666666.161614.peg.875	CDS	gi_957788176_gb_LMYF01000004_1_Hypsibius_dujardini_scaffold4	235303	235923	621	Ribosyl nicotinamide transporter, PnuC-like	NAD and NADP cofactor biosynthesis global	235303	235923
fig|6666666.161614.peg.876	CDS	gi_957788176_gb_LMYF01000004_1_Hypsibius_dujardini_scaffold4	236280	235957	324	hypothetical protein	- none -	235957	236280
fig|6666666.161614.peg.877	CDS	gi_957788176_gb_LMYF01000004_1_Hypsibius_dujardini_scaffold4	236454	237008	555	Ribosylnicotinamide kinase (EC 2.7.1.22)	NAD and NADP cofactor biosynthesis global	236454	237008
fig|6666666.161614.peg.878	CDS	gi_957788176_gb_LMYF01000004_1_Hypsibius_dujardini_scaffold4	237035	238711	1677	hypothetical protein	- none -	237035	238711
fig|6666666.161614.peg.879	CDS	gi_957788176_gb_LMYF01000004_1_Hypsibius_dujardini_scaffold4	239444	238713	732	Monofunctional biosynthetic peptidoglycan transglycosylase (EC 2.4.2.-)	Peptidoglycan Biosynthesis	238713	239444
fig|6666666.161614.peg.880	CDS	gi_957788176_gb_LMYF01000004_1_Hypsibius_dujardini_scaffold4	240108	239476	633	hypothetical protein	- none -	239476	240108
fig|6666666.161614.peg.881	CDS	gi_957788176_gb_LMYF01000004_1_Hypsibius_dujardini_scaffold4	241714	240182	1533	putative auxin-regulated protein	- none -	240182	241714
fig|6666666.161614.peg.882	CDS	gi_957788176_gb_LMYF01000004_1_Hypsibius_dujardini_scaffold4	243730	241787	1944	Glycosyl transferase, group 2 family protein	Exopolysaccharide Biosynthesis	241787	243730
fig|6666666.161614.peg.883	CDS	gi_957788176_gb_LMYF01000004_1_Hypsibius_dujardini_scaffold4	243811	244569	759	Inositol-1-monophosphatase (EC 3.1.3.25)	- none -	243811	244569
fig|6666666.161614.peg.884	CDS	gi_957788176_gb_LMYF01000004_1_Hypsibius_dujardini_scaffold4	244608	245636	1029	Thiamine-monophosphate kinase (EC 2.7.4.16)	5-FCL-like protein, Riboflavin synthesis cluster, Thiamin biosynthesis	244608	245636
fig|6666666.161614.peg.885	CDS	gi_957788176_gb_LMYF01000004_1_Hypsibius_dujardini_scaffold4	245663	247183	1521	Peptidase, S41 family	- none -	245663	247183
fig|6666666.161614.peg.886	CDS	gi_957788176_gb_LMYF01000004_1_Hypsibius_dujardini_scaffold4	248055	247216	840	Omega amidase (Nit2 homolog)	- none -	247216	248055
fig|6666666.161614.peg.887	CDS	gi_957788176_gb_LMYF01000004_1_Hypsibius_dujardini_scaffold4	248218	249654	1437	hypothetical protein	- none -	248218	249654
fig|6666666.161614.peg.888	CDS	gi_957788176_gb_LMYF01000004_1_Hypsibius_dujardini_scaffold4	250384	251049	666	hypothetical protein	- none -	250384	251049
fig|6666666.161614.peg.889	CDS	gi_957788176_gb_LMYF01000004_1_Hypsibius_dujardini_scaffold4	251186	251956	771	Transcriptional regulator, AraC family	- none -	251186	251956
fig|6666666.161614.peg.890	CDS	gi_957788176_gb_LMYF01000004_1_Hypsibius_dujardini_scaffold4	252046	252921	876	hypothetical protein	- none -	252046	252921
fig|6666666.161614.peg.891	CDS	gi_957788176_gb_LMYF01000004_1_Hypsibius_dujardini_scaffold4	253048	253596	549	Phophatidylinositol-4-phosphate 5-kinase (EC 2.7.1.68)	- none -	253048	253596
fig|6666666.161614.peg.892	CDS	gi_957788176_gb_LMYF01000004_1_Hypsibius_dujardini_scaffold4	253654	254217	564	cAMP-binding proteins - catabolite gene activator and regulatory subunit of cAMP-dependent protein kinases	cAMP signaling in bacteria	253654	254217
fig|6666666.161614.peg.893	CDS	gi_957788176_gb_LMYF01000004_1_Hypsibius_dujardini_scaffold4	254301	254756	456	hypothetical protein	- none -	254301	254756
fig|6666666.161614.peg.894	CDS	gi_957788176_gb_LMYF01000004_1_Hypsibius_dujardini_scaffold4	254767	255462	696	hypothetical protein	- none -	254767	255462
fig|6666666.161614.peg.895	CDS	gi_957788176_gb_LMYF01000004_1_Hypsibius_dujardini_scaffold4	255482	255952	471	putative membrane protein	- none -	255482	255952
fig|6666666.161614.peg.896	CDS	gi_957788176_gb_LMYF01000004_1_Hypsibius_dujardini_scaffold4	256167	257102	936	hypothetical protein	- none -	256167	257102
fig|6666666.161614.peg.897	CDS	gi_957788176_gb_LMYF01000004_1_Hypsibius_dujardini_scaffold4	257430	257975	546	Alkylhydroperoxidase AhpD core	- none -	257430	257975
fig|6666666.161614.peg.898	CDS	gi_957788176_gb_LMYF01000004_1_Hypsibius_dujardini_scaffold4	258085	257972	114	hypothetical protein	- none -	257972	258085
fig|6666666.161614.peg.899	CDS	gi_957788176_gb_LMYF01000004_1_Hypsibius_dujardini_scaffold4	258137	258772	636	Thioredoxin	- none -	258137	258772
fig|6666666.161614.peg.900	CDS	gi_957788176_gb_LMYF01000004_1_Hypsibius_dujardini_scaffold4	258789	259202	414	COGs COG3558	- none -	258789	259202
fig|6666666.161614.peg.901	CDS	gi_957788176_gb_LMYF01000004_1_Hypsibius_dujardini_scaffold4	259216	259419	204	hypothetical protein	- none -	259216	259419
fig|6666666.161614.peg.902	CDS	gi_957788176_gb_LMYF01000004_1_Hypsibius_dujardini_scaffold4	259451	260074	624	Flavodoxin reductases (ferredoxin-NADPH reductases) family 1	Anaerobic respiratory reductases	259451	260074
fig|6666666.161614.peg.903	CDS	gi_957788176_gb_LMYF01000004_1_Hypsibius_dujardini_scaffold4	260071	261327	1257	3-oxoacyl-[acyl-carrier-protein] synthase, KASII (EC 2.3.1.41)	Fatty Acid Biosynthesis FASII	260071	261327
fig|6666666.161614.peg.904	CDS	gi_957788176_gb_LMYF01000004_1_Hypsibius_dujardini_scaffold4	261391	262272	882	Transcriptional regulator, AraC family	- none -	261391	262272
fig|6666666.161614.peg.905	CDS	gi_957788176_gb_LMYF01000004_1_Hypsibius_dujardini_scaffold4	262900	262427	474	Regulatory protein RecX	DNA repair system including RecA, MutS and a hypothetical protein, RecA and RecX	262427	262900
fig|6666666.161614.peg.906	CDS	gi_957788176_gb_LMYF01000004_1_Hypsibius_dujardini_scaffold4	266160	262933	3228	hypothetical protein	- none -	262933	266160
fig|6666666.161614.peg.907	CDS	gi_957788176_gb_LMYF01000004_1_Hypsibius_dujardini_scaffold4	267396	266296	1101	periplasmic serine protease, DO/DeqQ family	- none -	266296	267396
fig|6666666.161614.peg.908	CDS	gi_957788176_gb_LMYF01000004_1_Hypsibius_dujardini_scaffold4	268778	267459	1320	hypothetical protein	- none -	267459	268778
fig|6666666.161614.peg.909	CDS	gi_957788176_gb_LMYF01000004_1_Hypsibius_dujardini_scaffold4	268932	270047	1116	DNA polymerase III beta subunit (EC 2.7.7.7)	Cell Division Subsystem including YidCD, DNA replication cluster 1	268932	270047
fig|6666666.161614.peg.910	CDS	gi_957788176_gb_LMYF01000004_1_Hypsibius_dujardini_scaffold4	270133	270567	435	hypothetical protein	- none -	270133	270567
fig|6666666.161614.peg.911	CDS	gi_957788176_gb_LMYF01000004_1_Hypsibius_dujardini_scaffold4	270673	271440	768	Possible sterol desaturase	- none -	270673	271440
fig|6666666.161614.peg.912	CDS	gi_957788176_gb_LMYF01000004_1_Hypsibius_dujardini_scaffold4	271465	272214	750	hypothetical protein	- none -	271465	272214
fig|6666666.161614.peg.913	CDS	gi_957788176_gb_LMYF01000004_1_Hypsibius_dujardini_scaffold4	272224	272940	717	3-deoxy-manno-octulosonate cytidylyltransferase (EC 2.7.7.38)	KDO2-Lipid A biosynthesis	272224	272940
fig|6666666.161614.peg.914	CDS	gi_957788176_gb_LMYF01000004_1_Hypsibius_dujardini_scaffold4	274521	272935	1587	Rhomboid family protein	- none -	272935	274521
fig|6666666.161614.peg.915	CDS	gi_957788176_gb_LMYF01000004_1_Hypsibius_dujardini_scaffold4	274698	275771	1074	Alcohol dehydrogenase (EC 1.1.1.1)	5-FCL-like protein, Butanol Biosynthesis, Glycerolipid and Glycerophospholipid Metabolism in Bacteria	274698	275771
fig|6666666.161614.peg.916	CDS	gi_957788176_gb_LMYF01000004_1_Hypsibius_dujardini_scaffold4	275775	276167	393	hypothetical protein	- none -	275775	276167
fig|6666666.161614.peg.917	CDS	gi_957788176_gb_LMYF01000004_1_Hypsibius_dujardini_scaffold4	276175	276603	429	hypothetical protein	- none -	276175	276603
fig|6666666.161614.peg.918	CDS	gi_957788176_gb_LMYF01000004_1_Hypsibius_dujardini_scaffold4	276672	277142	471	hypothetical protein	- none -	276672	277142
fig|6666666.161614.peg.919	CDS	gi_957788176_gb_LMYF01000004_1_Hypsibius_dujardini_scaffold4	277216	277701	486	Mlr2180 protein	- none -	277216	277701
fig|6666666.161614.peg.920	CDS	gi_957788176_gb_LMYF01000004_1_Hypsibius_dujardini_scaffold4	277798	278907	1110	Magnesium and cobalt transport protein CorA	Magnesium transport	277798	278907
fig|6666666.161614.peg.921	CDS	gi_957788176_gb_LMYF01000004_1_Hypsibius_dujardini_scaffold4	278939	279388	450	hypothetical protein	- none -	278939	279388
fig|6666666.161614.peg.922	CDS	gi_957788176_gb_LMYF01000004_1_Hypsibius_dujardini_scaffold4	279898	279392	507	hypothetical	- none -	279392	279898
fig|6666666.161614.peg.923	CDS	gi_957788176_gb_LMYF01000004_1_Hypsibius_dujardini_scaffold4	282076	280025	2052	Peptidyl-prolyl cis-trans isomerase	- none -	280025	282076
fig|6666666.161614.peg.924	CDS	gi_957788176_gb_LMYF01000004_1_Hypsibius_dujardini_scaffold4	284426	282294	2133	FIG00654191: hypothetical protein	- none -	282294	284426
fig|6666666.161614.peg.925	CDS	gi_957788176_gb_LMYF01000004_1_Hypsibius_dujardini_scaffold4	285069	284923	147	hypothetical protein	- none -	284923	285069
fig|6666666.161614.peg.926	CDS	gi_957788176_gb_LMYF01000004_1_Hypsibius_dujardini_scaffold4	285085	286092	1008	Quinolinate synthetase (EC 2.5.1.72)	Mycobacterium virulence operon possibly involved in quinolinate biosynthesis, NAD and NADP cofactor biosynthesis global	285085	286092
fig|6666666.161614.peg.927	CDS	gi_957788176_gb_LMYF01000004_1_Hypsibius_dujardini_scaffold4	286190	286786	597	hypothetical protein	- none -	286190	286786
fig|6666666.161614.peg.928	CDS	gi_957788176_gb_LMYF01000004_1_Hypsibius_dujardini_scaffold4	287053	286814	240	hypothetical protein	- none -	286814	287053
fig|6666666.161614.peg.929	CDS	gi_957788176_gb_LMYF01000004_1_Hypsibius_dujardini_scaffold4	291267	288076	3192	Putative cytochrome C-type biogenesis protein	Biogenesis of c-type cytochromes	288076	291267
fig|6666666.161614.peg.930	CDS	gi_957788176_gb_LMYF01000004_1_Hypsibius_dujardini_scaffold4	292719	291454	1266	putative lipoprotein	- none -	291454	292719
fig|6666666.161614.peg.931	CDS	gi_957788176_gb_LMYF01000004_1_Hypsibius_dujardini_scaffold4	293360	292935	426	Ferredoxin reductase	Anaerobic respiratory reductases	292935	293360
fig|6666666.161614.peg.932	CDS	gi_957788176_gb_LMYF01000004_1_Hypsibius_dujardini_scaffold4	294245	293607	639	GTP cyclohydrolase I (EC 3.5.4.16) type 1	Folate Biosynthesis, Folate biosynthesis cluster, Pterin synthesis related cluster, Queuosine-Archaeosine Biosynthesis	293607	294245
fig|6666666.161614.peg.933	CDS	gi_957788176_gb_LMYF01000004_1_Hypsibius_dujardini_scaffold4	294909	294262	648	RNA polymerase sigma-54 factor RpoN	Transcription initiation, bacterial sigma factors	294262	294909
fig|6666666.161614.peg.934	CDS	gi_957788176_gb_LMYF01000004_1_Hypsibius_dujardini_scaffold4	295295	294912	384	hypothetical protein	- none -	294912	295295
fig|6666666.161614.peg.935	CDS	gi_957788176_gb_LMYF01000004_1_Hypsibius_dujardini_scaffold4	295833	295324	510	hypothetical protein	- none -	295324	295833
fig|6666666.161614.peg.936	CDS	gi_957788176_gb_LMYF01000004_1_Hypsibius_dujardini_scaffold4	297255	296266	990	D-3-phosphoglycerate dehydrogenase (EC 1.1.1.95)	Glycine and Serine Utilization, Pyridoxin (Vitamin B6) Biosynthesis, Serine Biosynthesis	296266	297255
fig|6666666.161614.peg.937	CDS	gi_957788176_gb_LMYF01000004_1_Hypsibius_dujardini_scaffold4	297880	299985	2106	Beta-hexosaminidase (EC 3.2.1.52)	Chitin and N-acetylglucosamine utilization	297880	299985
fig|6666666.161614.peg.938	CDS	gi_957788176_gb_LMYF01000004_1_Hypsibius_dujardini_scaffold4	300338	300817	480	hypothetical protein	- none -	300338	300817
fig|6666666.161614.peg.939	CDS	gi_957788176_gb_LMYF01000004_1_Hypsibius_dujardini_scaffold4	300875	301117	243	hypothetical protein	- none -	300875	301117
fig|6666666.161614.peg.940	CDS	gi_957788176_gb_LMYF01000004_1_Hypsibius_dujardini_scaffold4	301277	301837	561	hypothetical protein	- none -	301277	301837
fig|6666666.161614.peg.941	CDS	gi_957788176_gb_LMYF01000004_1_Hypsibius_dujardini_scaffold4	302021	302833	813	hypothetical protein	- none -	302021	302833
fig|6666666.161614.peg.942	CDS	gi_957788176_gb_LMYF01000004_1_Hypsibius_dujardini_scaffold4	304360	302858	1503	Alg9 family protein mannosyltransferase	- none -	302858	304360
fig|6666666.161614.peg.943	CDS	gi_957788176_gb_LMYF01000004_1_Hypsibius_dujardini_scaffold4	306033	304360	1674	Polymyxin resistance protein ArnT, undecaprenyl phosphate-alpha-L-Ara4N transferase; Melittin resistance protein PqaB	- none -	304360	306033
fig|6666666.161614.peg.944	CDS	gi_957788176_gb_LMYF01000004_1_Hypsibius_dujardini_scaffold4	306463	306071	393	Arsenate reductase (EC 1.20.4.1)	Anaerobic respiratory reductases, Arsenic resistance	306071	306463
fig|6666666.161614.peg.945	CDS	gi_957788176_gb_LMYF01000004_1_Hypsibius_dujardini_scaffold4	307500	306460	1041	Arsenical-resistance protein ACR3	Arsenic resistance	306460	307500
fig|6666666.161614.peg.946	CDS	gi_957788176_gb_LMYF01000004_1_Hypsibius_dujardini_scaffold4	307678	307553	126	hypothetical protein	- none -	307553	307678
fig|6666666.161614.peg.947	CDS	gi_957788176_gb_LMYF01000004_1_Hypsibius_dujardini_scaffold4	308526	307669	858	tRNA (adenine57/58-N1)-methyltransferase (EC 2.1.1.36)	- none -	307669	308526
fig|6666666.161614.peg.948	CDS	gi_957788176_gb_LMYF01000004_1_Hypsibius_dujardini_scaffold4	308980	308546	435	N-acetylglutamate synthase and related acetyltransferases	- none -	308546	308980
fig|6666666.161614.peg.949	CDS	gi_957788176_gb_LMYF01000004_1_Hypsibius_dujardini_scaffold4	309358	309023	336	Transcriptional regulator, ArsR family	- none -	309023	309358
fig|6666666.161614.peg.950	CDS	gi_957788176_gb_LMYF01000004_1_Hypsibius_dujardini_scaffold4	310298	309438	861	Putative integral membrane protein	- none -	309438	310298
fig|6666666.161614.peg.951	CDS	gi_957788176_gb_LMYF01000004_1_Hypsibius_dujardini_scaffold4	311546	310335	1212	hypothetical protein	- none -	310335	311546
fig|6666666.161614.peg.952	CDS	gi_957788176_gb_LMYF01000004_1_Hypsibius_dujardini_scaffold4	312708	311563	1146	Aspartate aminotransferase (EC 2.6.1.1)	CBSS-216591.1.peg.168, Glutamine, Glutamate, Aspartate and Asparagine Biosynthesis, Threonine and Homoserine Biosynthesis	311563	312708
fig|6666666.161614.peg.953	CDS	gi_957788176_gb_LMYF01000004_1_Hypsibius_dujardini_scaffold4	313095	312766	330	hypothetical protein	- none -	312766	313095
fig|6666666.161614.peg.954	CDS	gi_957788176_gb_LMYF01000004_1_Hypsibius_dujardini_scaffold4	313483	313085	399	Putative translation initiation inhibitor, yjgF family	- none -	313085	313483
fig|6666666.161614.peg.955	CDS	gi_957788176_gb_LMYF01000004_1_Hypsibius_dujardini_scaffold4	314278	313556	723	hypothetical protein	- none -	313556	314278
fig|6666666.161614.peg.956	CDS	gi_957788176_gb_LMYF01000004_1_Hypsibius_dujardini_scaffold4	315391	314336	1056	Mannose-1-phosphate guanylyltransferase (GDP) (EC 2.7.7.22)	Mannose Metabolism	314336	315391
fig|6666666.161614.peg.957	CDS	gi_957788176_gb_LMYF01000004_1_Hypsibius_dujardini_scaffold4	316838	315453	1386	Peptidase, S41 family	- none -	315453	316838
fig|6666666.161614.peg.958	CDS	gi_957788176_gb_LMYF01000004_1_Hypsibius_dujardini_scaffold4	317880	316918	963	Arabinose 5-phosphate isomerase (EC 5.3.1.13)	KDO2-Lipid A biosynthesis	316918	317880
fig|6666666.161614.peg.959	CDS	gi_957788176_gb_LMYF01000004_1_Hypsibius_dujardini_scaffold4	318203	320470	2268	ATP-dependent DNA helicase RecQ	DNA repair, bacterial RecFOR pathway	318203	320470
fig|6666666.161614.rna.14	RNA	gi_957788176_gb_LMYF01000004_1_Hypsibius_dujardini_scaffold4	320588	320660	73	tRNA-Phe-GAA	tRNAs	320588	320660
fig|6666666.161614.peg.960	CDS	gi_957788176_gb_LMYF01000004_1_Hypsibius_dujardini_scaffold4	320742	323390	2649	Beta-glucosidase (EC 3.2.1.21)	- none -	320742	323390
fig|6666666.161614.peg.961	CDS	gi_957788176_gb_LMYF01000004_1_Hypsibius_dujardini_scaffold4	324301	323393	909	Pseudouridine 5'-phosphate glycosidase	Pseudouridine catabolism	323393	324301
fig|6666666.161614.peg.962	CDS	gi_957788176_gb_LMYF01000004_1_Hypsibius_dujardini_scaffold4	325227	324301	927	Pseudouridine kinase (EC 2.7.1.83)	Pseudouridine catabolism	324301	325227
fig|6666666.161614.peg.963	CDS	gi_957788176_gb_LMYF01000004_1_Hypsibius_dujardini_scaffold4	325627	325250	378	hypothetical protein	- none -	325250	325627
fig|6666666.161614.peg.964	CDS	gi_957788176_gb_LMYF01000004_1_Hypsibius_dujardini_scaffold4	325844	326191	348	Single-stranded DNA-binding protein	DNA repair, bacterial, DNA repair, bacterial RecFOR pathway	325844	326191
fig|6666666.161614.peg.965	CDS	gi_957788176_gb_LMYF01000004_1_Hypsibius_dujardini_scaffold4	326280	326465	186	hypothetical protein	- none -	326280	326465
fig|6666666.161614.peg.966	CDS	gi_957788176_gb_LMYF01000004_1_Hypsibius_dujardini_scaffold4	326493	326654	162	hypothetical protein	- none -	326493	326654
fig|6666666.161614.peg.967	CDS	gi_957788176_gb_LMYF01000004_1_Hypsibius_dujardini_scaffold4	326713	329208	2496	putative helicase	- none -	326713	329208
fig|6666666.161614.peg.968	CDS	gi_957788176_gb_LMYF01000004_1_Hypsibius_dujardini_scaffold4	330680	329205	1476	CHU large protein; uncharacterized	- none -	329205	330680
fig|6666666.161614.peg.969	CDS	gi_957788176_gb_LMYF01000004_1_Hypsibius_dujardini_scaffold4	330891	331397	507	hypothetical protein	- none -	330891	331397
fig|6666666.161614.peg.970	CDS	gi_957788176_gb_LMYF01000004_1_Hypsibius_dujardini_scaffold4	331402	332568	1167	D-alanine--D-alanine ligase (EC 6.3.2.4)	Peptidoglycan Biosynthesis, Peptidoglycan biosynthesis--gjo, cell division cluster containing FtsQ	331402	332568
fig|6666666.161614.peg.971	CDS	gi_957788176_gb_LMYF01000004_1_Hypsibius_dujardini_scaffold4	332633	334084	1452	D-alanine-D-alanine ligase and related ATP-grasp enzymes-like	- none -	332633	334084
fig|6666666.161614.peg.972	CDS	gi_957788176_gb_LMYF01000004_1_Hypsibius_dujardini_scaffold4	335955	334093	1863	tRNA uridine 5-carboxymethylaminomethyl modification enzyme GidA	Cell Division Subsystem including YidCD, RNA modification and chromosome partitioning cluster, mnm5U34 biosynthesis bacteria	334093	335955
fig|6666666.161614.peg.973	CDS	gi_957788176_gb_LMYF01000004_1_Hypsibius_dujardini_scaffold4	336507	336052	456	FIG000233: metal-dependent hydrolase	- none -	336052	336507
fig|6666666.161614.peg.974	CDS	gi_957788176_gb_LMYF01000004_1_Hypsibius_dujardini_scaffold4	336569	336799	231	FeoA	- none -	336569	336799
fig|6666666.161614.peg.975	CDS	gi_957788176_gb_LMYF01000004_1_Hypsibius_dujardini_scaffold4	336815	337387	573	Nicotinate-nucleotide adenylyltransferase (EC 2.7.7.18)	NAD and NADP cofactor biosynthesis global	336815	337387
fig|6666666.161614.peg.976	CDS	gi_957788176_gb_LMYF01000004_1_Hypsibius_dujardini_scaffold4	338631	337375	1257	hypothetical protein	- none -	337375	338631
fig|6666666.161614.peg.977	CDS	gi_957788176_gb_LMYF01000004_1_Hypsibius_dujardini_scaffold4	338668	340023	1356	N-acetyl-L,L-diaminopimelate deacetylase (EC 3.5.1.47)	Lysine Biosynthesis DAP Pathway, GJO scratch	338668	340023
fig|6666666.161614.peg.978	CDS	gi_957788176_gb_LMYF01000004_1_Hypsibius_dujardini_scaffold4	340150	340968	819	Beta-lactamase (EC 3.5.2.6)	Beta-lactamase	340150	340968
fig|6666666.161614.peg.979	CDS	gi_957788176_gb_LMYF01000004_1_Hypsibius_dujardini_scaffold4	343026	340969	2058	Ferrous iron transport protein B	- none -	340969	343026
fig|6666666.161614.peg.980	CDS	gi_957788176_gb_LMYF01000004_1_Hypsibius_dujardini_scaffold4	343289	343122	168	hypothetical protein	- none -	343122	343289
fig|6666666.161614.peg.981	CDS	gi_957788176_gb_LMYF01000004_1_Hypsibius_dujardini_scaffold4	343279	344928	1650	Probable aminopeptidase (EC 3.4.11.-)	- none -	343279	344928
fig|6666666.161614.peg.982	CDS	gi_957788176_gb_LMYF01000004_1_Hypsibius_dujardini_scaffold4	344958	345407	450	hypothetical protein	- none -	344958	345407
fig|6666666.161614.peg.983	CDS	gi_957788176_gb_LMYF01000004_1_Hypsibius_dujardini_scaffold4	345425	345661	237	Pterin-4-alpha-carbinolamine dehydratase (EC 4.2.1.96)	Pterin carbinolamine dehydratase	345425	345661
fig|6666666.161614.peg.984	CDS	gi_957788176_gb_LMYF01000004_1_Hypsibius_dujardini_scaffold4	345692	346585	894	hypothetical protein	- none -	345692	346585
fig|6666666.161614.peg.985	CDS	gi_957788176_gb_LMYF01000004_1_Hypsibius_dujardini_scaffold4	347103	346600	504	hypothetical protein	- none -	346600	347103
fig|6666666.161614.peg.986	CDS	gi_957788176_gb_LMYF01000004_1_Hypsibius_dujardini_scaffold4	347661	347137	525	hypothetical protein	- none -	347137	347661
fig|6666666.161614.peg.987	CDS	gi_957788176_gb_LMYF01000004_1_Hypsibius_dujardini_scaffold4	348131	347670	462	Histone acetyltransferase HPA2 and related acetyltransferases	CBSS-216591.1.peg.168	347670	348131
fig|6666666.161614.peg.988	CDS	gi_957788176_gb_LMYF01000004_1_Hypsibius_dujardini_scaffold4	349237	348158	1080	Selenide,water dikinase (EC 2.7.9.3)	Selenocysteine metabolism	348158	349237
fig|6666666.161614.peg.989	CDS	gi_957788176_gb_LMYF01000004_1_Hypsibius_dujardini_scaffold4	350056	349268	789	IroE protein	- none -	349268	350056
fig|6666666.161614.peg.990	CDS	gi_957788176_gb_LMYF01000004_1_Hypsibius_dujardini_scaffold4	351612	350065	1548	hypothetical protein	- none -	350065	351612
fig|6666666.161614.peg.991	CDS	gi_957788176_gb_LMYF01000004_1_Hypsibius_dujardini_scaffold4	352730	351609	1122	Selenophosphate-dependent tRNA 2-selenouridine synthase	Selenocysteine metabolism	351609	352730
fig|6666666.161614.peg.992	CDS	gi_957788176_gb_LMYF01000004_1_Hypsibius_dujardini_scaffold4	354438	352837	1602	Transcription termination factor Rho	Transcription factors bacterial	352837	354438
fig|6666666.161614.peg.993	CDS	gi_957788176_gb_LMYF01000004_1_Hypsibius_dujardini_scaffold4	354676	354485	192	hypothetical protein	- none -	354485	354676
fig|6666666.161614.peg.994	CDS	gi_957788176_gb_LMYF01000004_1_Hypsibius_dujardini_scaffold4	354838	356280	1443	Asparaginyl-tRNA synthetase (EC 6.1.1.22)	tRNA aminoacylation, Asp and Asn	354838	356280
fig|6666666.161614.peg.995	CDS	gi_957788176_gb_LMYF01000004_1_Hypsibius_dujardini_scaffold4	357266	356436	831	hypothetical protein	- none -	356436	357266
fig|6666666.161614.peg.996	CDS	gi_957788176_gb_LMYF01000004_1_Hypsibius_dujardini_scaffold4	357390	357944	555	Biopolymer transport protein ExbD/TolR	Ton and Tol transport systems	357390	357944
fig|6666666.161614.peg.997	CDS	gi_957788176_gb_LMYF01000004_1_Hypsibius_dujardini_scaffold4	358970	357945	1026	FIG00480936: hypothetical protein	- none -	357945	358970
fig|6666666.161614.peg.998	CDS	gi_957788176_gb_LMYF01000004_1_Hypsibius_dujardini_scaffold4	358903	359019	117	hypothetical protein	- none -	358903	359019
fig|6666666.161614.peg.999	CDS	gi_957788176_gb_LMYF01000004_1_Hypsibius_dujardini_scaffold4	359202	359693	492	hypothetical protein	- none -	359202	359693
fig|6666666.161614.peg.1000	CDS	gi_957788176_gb_LMYF01000004_1_Hypsibius_dujardini_scaffold4	359741	360088	348	Transcriptional regulator, PadR family	CBSS-1352.1.peg.856	359741	360088
fig|6666666.161614.peg.1001	CDS	gi_957788176_gb_LMYF01000004_1_Hypsibius_dujardini_scaffold4	360113	362359	2247	hypothetical protein	- none -	360113	362359
fig|6666666.161614.peg.1002	CDS	gi_957788176_gb_LMYF01000004_1_Hypsibius_dujardini_scaffold4	362503	363588	1086	Aminomethyltransferase (glycine cleavage system T protein) (EC 2.1.2.10)	Glycine and Serine Utilization, Glycine cleavage system	362503	363588
fig|6666666.161614.peg.1003	CDS	gi_957788176_gb_LMYF01000004_1_Hypsibius_dujardini_scaffold4	363673	364158	486	Uncharacterized conserved protein	- none -	363673	364158
fig|6666666.161614.peg.1004	CDS	gi_957788176_gb_LMYF01000004_1_Hypsibius_dujardini_scaffold4	364204	364929	726	Probable 2-phosphosulfolactate phosphatase (EC 3.1.3.71)	- none -	364204	364929
fig|6666666.161614.peg.1005	CDS	gi_957788176_gb_LMYF01000004_1_Hypsibius_dujardini_scaffold4	365101	368871	3771	DEAD/DEAH box helicase-like protein	- none -	365101	368871
fig|6666666.161614.peg.1006	CDS	gi_957788176_gb_LMYF01000004_1_Hypsibius_dujardini_scaffold4	368983	371871	2889	hypothetical protein	- none -	368983	371871
fig|6666666.161614.peg.1007	CDS	gi_957788176_gb_LMYF01000004_1_Hypsibius_dujardini_scaffold4	372092	371934	159	hypothetical protein	- none -	371934	372092
fig|6666666.161614.peg.1008	CDS	gi_957788176_gb_LMYF01000004_1_Hypsibius_dujardini_scaffold4	372226	372789	564	hypothetical protein	- none -	372226	372789
fig|6666666.161614.peg.1009	CDS	gi_957788176_gb_LMYF01000004_1_Hypsibius_dujardini_scaffold4	372969	375782	2814	hypothetical protein	- none -	372969	375782
fig|6666666.161614.peg.1010	CDS	gi_957788176_gb_LMYF01000004_1_Hypsibius_dujardini_scaffold4	376061	376543	483	hypothetical protein	- none -	376061	376543
fig|6666666.161614.peg.1011	CDS	gi_957788176_gb_LMYF01000004_1_Hypsibius_dujardini_scaffold4	376681	376544	138	hypothetical protein	- none -	376544	376681
fig|6666666.161614.peg.1012	CDS	gi_957788176_gb_LMYF01000004_1_Hypsibius_dujardini_scaffold4	376707	377384	678	hypothetical protein	- none -	376707	377384
fig|6666666.161614.peg.1013	CDS	gi_957788176_gb_LMYF01000004_1_Hypsibius_dujardini_scaffold4	377411	378013	603	hypothetical protein	- none -	377411	378013
fig|6666666.161614.peg.1014	CDS	gi_957788176_gb_LMYF01000004_1_Hypsibius_dujardini_scaffold4	378048	378446	399	hypothetical protein	- none -	378048	378446
fig|6666666.161614.peg.1015	CDS	gi_957788176_gb_LMYF01000004_1_Hypsibius_dujardini_scaffold4	378456	379031	576	Transcriptional regulator, AraC family	- none -	378456	379031
fig|6666666.161614.peg.1016	CDS	gi_957788176_gb_LMYF01000004_1_Hypsibius_dujardini_scaffold4	379378	380292	915	Transcriptional regulator, AraC family	- none -	379378	380292
fig|6666666.161614.peg.1017	CDS	gi_957788176_gb_LMYF01000004_1_Hypsibius_dujardini_scaffold4	380967	380335	633	hypothetical protein	- none -	380335	380967
fig|6666666.161614.peg.1018	CDS	gi_957788176_gb_LMYF01000004_1_Hypsibius_dujardini_scaffold4	381978	381115	864	Uncharacterized iron-regulated protein	- none -	381115	381978
fig|6666666.161614.peg.1019	CDS	gi_957788176_gb_LMYF01000004_1_Hypsibius_dujardini_scaffold4	383735	382041	1695	Sensory box histidine kinase	- none -	382041	383735
fig|6666666.161614.peg.1020	CDS	gi_957788176_gb_LMYF01000004_1_Hypsibius_dujardini_scaffold4	385019	383898	1122	Osmosensitive K+ channel histidine kinase KdpD (EC 2.7.3.-)	Potassium homeostasis	383898	385019
fig|6666666.161614.peg.1021	CDS	gi_957788176_gb_LMYF01000004_1_Hypsibius_dujardini_scaffold4	386091	385021	1071	Outer membrane protein	- none -	385021	386091
fig|6666666.161614.peg.1022	CDS	gi_957788176_gb_LMYF01000004_1_Hypsibius_dujardini_scaffold4	386667	386113	555	Potassium-transporting ATPase C chain (EC 3.6.3.12) (TC 3.A.3.7.1)	Potassium homeostasis	386113	386667
fig|6666666.161614.peg.1023	CDS	gi_957788176_gb_LMYF01000004_1_Hypsibius_dujardini_scaffold4	388740	386686	2055	Potassium-transporting ATPase B chain (EC 3.6.3.12) (TC 3.A.3.7.1)	Potassium homeostasis	386686	388740
fig|6666666.161614.peg.1024	CDS	gi_957788176_gb_LMYF01000004_1_Hypsibius_dujardini_scaffold4	390466	388751	1716	Potassium-transporting ATPase A chain (EC 3.6.3.12) (TC 3.A.3.7.1)	Potassium homeostasis	388751	390466
fig|6666666.161614.peg.1025	CDS	gi_957788176_gb_LMYF01000004_1_Hypsibius_dujardini_scaffold4	390679	390825	147	hypothetical protein	- none -	390679	390825
fig|6666666.161614.peg.1026	CDS	gi_957788176_gb_LMYF01000004_1_Hypsibius_dujardini_scaffold4	391125	390871	255	hypothetical protein	- none -	390871	391125
fig|6666666.161614.peg.1027	CDS	gi_957788176_gb_LMYF01000004_1_Hypsibius_dujardini_scaffold4	392490	391159	1332	Response regulator of zinc sigma-54-dependent two-component system	Zinc resistance	391159	392490
fig|6666666.161614.peg.1028	CDS	gi_957788176_gb_LMYF01000004_1_Hypsibius_dujardini_scaffold4	393859	392624	1236	hypothetical protein	- none -	392624	393859
fig|6666666.161614.peg.1029	CDS	gi_957788176_gb_LMYF01000004_1_Hypsibius_dujardini_scaffold4	394278	393907	372	hypothetical protein	- none -	393907	394278
fig|6666666.161614.peg.1030	CDS	gi_957788176_gb_LMYF01000004_1_Hypsibius_dujardini_scaffold4	395022	394531	492	FIG00652291: hypothetical protein	- none -	394531	395022
fig|6666666.161614.peg.1031	CDS	gi_957788176_gb_LMYF01000004_1_Hypsibius_dujardini_scaffold4	396565	395030	1536	Catalyzes the cleavage of p-aminobenzoyl-glutamate to p-aminobenzoate and glutamate, subunit A	- none -	395030	396565
fig|6666666.161614.peg.1032	CDS	gi_957788176_gb_LMYF01000004_1_Hypsibius_dujardini_scaffold4	396700	396587	114	hypothetical protein	- none -	396587	396700
fig|6666666.161614.peg.1033	CDS	gi_957788176_gb_LMYF01000004_1_Hypsibius_dujardini_scaffold4	397543	396770	774	LmbE-like protein protein	- none -	396770	397543
fig|6666666.161614.peg.1034	CDS	gi_957788176_gb_LMYF01000004_1_Hypsibius_dujardini_scaffold4	399820	398207	1614	hypothetical protein	- none -	398207	399820
fig|6666666.161614.peg.1035	CDS	gi_957788176_gb_LMYF01000004_1_Hypsibius_dujardini_scaffold4	400129	402222	2094	hypothetical protein	- none -	400129	402222
fig|6666666.161614.peg.1036	CDS	gi_957788176_gb_LMYF01000004_1_Hypsibius_dujardini_scaffold4	402267	403322	1056	hypothetical protein	- none -	402267	403322
fig|6666666.161614.peg.1037	CDS	gi_957788176_gb_LMYF01000004_1_Hypsibius_dujardini_scaffold4	404202	403393	810	hypothetical protein	- none -	403393	404202
fig|6666666.161614.peg.1038	CDS	gi_957788176_gb_LMYF01000004_1_Hypsibius_dujardini_scaffold4	404303	406060	1758	hypothetical protein	- none -	404303	406060
fig|6666666.161614.peg.1039	CDS	gi_957788176_gb_LMYF01000004_1_Hypsibius_dujardini_scaffold4	406057	406746	690	Transcriptional regulatory protein rprY	- none -	406057	406746
fig|6666666.161614.peg.1040	CDS	gi_957788176_gb_LMYF01000004_1_Hypsibius_dujardini_scaffold4	410093	406749	3345	hypothetical protein	- none -	406749	410093
fig|6666666.161614.peg.1041	CDS	gi_957788176_gb_LMYF01000004_1_Hypsibius_dujardini_scaffold4	411289	410099	1191	hypothetical protein	- none -	410099	411289
fig|6666666.161614.peg.1042	CDS	gi_957788176_gb_LMYF01000004_1_Hypsibius_dujardini_scaffold4	411535	412626	1092	N-acetylglucosamine-6-phosphate deacetylase (EC 3.5.1.25)	Chitin and N-acetylglucosamine utilization, Sialic Acid Metabolism	411535	412626
fig|6666666.161614.peg.1043	CDS	gi_957788176_gb_LMYF01000004_1_Hypsibius_dujardini_scaffold4	412626	413828	1203	hypothetical protein	- none -	412626	413828
fig|6666666.161614.peg.1044	CDS	gi_957788176_gb_LMYF01000004_1_Hypsibius_dujardini_scaffold4	413909	414880	972	Putative diheme cytochrome c-553	Soluble cytochromes and functionally related electron carriers	413909	414880
fig|6666666.161614.peg.1045	CDS	gi_957788176_gb_LMYF01000004_1_Hypsibius_dujardini_scaffold4	415763	415005	759	Sterol desaturase	- none -	415005	415763
fig|6666666.161614.peg.1046	CDS	gi_957788176_gb_LMYF01000004_1_Hypsibius_dujardini_scaffold4	415720	415869	150	hypothetical protein	- none -	415720	415869
fig|6666666.161614.peg.1047	CDS	gi_957788176_gb_LMYF01000004_1_Hypsibius_dujardini_scaffold4	416266	415844	423	FKBP-type peptidyl-prolyl cis-trans isomerase	- none -	415844	416266
fig|6666666.161614.peg.1048	CDS	gi_957788176_gb_LMYF01000004_1_Hypsibius_dujardini_scaffold4	416590	416348	243	hypothetical protein	- none -	416348	416590
fig|6666666.161614.peg.1049	CDS	gi_957788176_gb_LMYF01000004_1_Hypsibius_dujardini_scaffold4	417077	417235	159	hypothetical protein	- none -	417077	417235
fig|6666666.161614.peg.1050	CDS	gi_957788176_gb_LMYF01000004_1_Hypsibius_dujardini_scaffold4	418742	417192	1551	hypothetical protein	- none -	417192	418742
fig|6666666.161614.peg.1051	CDS	gi_957788176_gb_LMYF01000004_1_Hypsibius_dujardini_scaffold4	419182	418883	300	hypothetical protein	- none -	418883	419182
fig|6666666.161614.peg.1052	CDS	gi_957788176_gb_LMYF01000004_1_Hypsibius_dujardini_scaffold4	420486	419362	1125	Menaquinone via futalosine step 3	Menaquinone Biosynthesis via Futalosine	419362	420486
fig|6666666.161614.peg.1053	CDS	gi_957788176_gb_LMYF01000004_1_Hypsibius_dujardini_scaffold4	420490	420642	153	hypothetical protein	- none -	420490	420642
fig|6666666.161614.peg.1054	CDS	gi_957788176_gb_LMYF01000004_1_Hypsibius_dujardini_scaffold4	420719	421912	1194	hypothetical protein	- none -	420719	421912
fig|6666666.161614.peg.1055	CDS	gi_957788176_gb_LMYF01000004_1_Hypsibius_dujardini_scaffold4	422017	423255	1239	putative zinc protease	- none -	422017	423255
fig|6666666.161614.peg.1056	CDS	gi_957788176_gb_LMYF01000004_1_Hypsibius_dujardini_scaffold4	423267	424559	1293	ZINC PROTEASE (EC 3.4.99.-)	- none -	423267	424559
fig|6666666.161614.peg.1057	CDS	gi_957788176_gb_LMYF01000004_1_Hypsibius_dujardini_scaffold4	425791	424616	1176	hypothetical protein	- none -	424616	425791
fig|6666666.161614.peg.1058	CDS	gi_957788176_gb_LMYF01000004_1_Hypsibius_dujardini_scaffold4	426011	425898	114	hypothetical protein	- none -	425898	426011
fig|6666666.161614.peg.1059	CDS	gi_957788176_gb_LMYF01000004_1_Hypsibius_dujardini_scaffold4	425967	427988	2022	Branched-chain alpha-keto acid dehydrogenase, E1 component, alpha subunit (EC 1.2.4.4) / Branched-chain alpha-keto acid dehydrogenase, E1 component, beta subunit (EC 1.2.4.4)	Dehydrogenase complexes, Dehydrogenase complexes, Isoleucine degradation, Isoleucine degradation, Leucine Degradation and HMG-CoA Metabolism, Leucine Degradation and HMG-CoA Metabolism, Valine degradation, Valine degradation	425967	427988
fig|6666666.161614.peg.1060	CDS	gi_957788176_gb_LMYF01000004_1_Hypsibius_dujardini_scaffold4	428032	429633	1602	hypothetical protein	- none -	428032	429633
fig|6666666.161614.peg.1061	CDS	gi_957788176_gb_LMYF01000004_1_Hypsibius_dujardini_scaffold4	429743	431095	1353	hypothetical protein	- none -	429743	431095
fig|6666666.161614.peg.1062	CDS	gi_957788176_gb_LMYF01000004_1_Hypsibius_dujardini_scaffold4	431122	432474	1353	hypothetical protein	- none -	431122	432474
fig|6666666.161614.peg.1063	CDS	gi_957788176_gb_LMYF01000004_1_Hypsibius_dujardini_scaffold4	432533	434539	2007	Acylamino-acid-releasing enzyme (EC 3.4.19.1)	Omega peptidases (EC 3.4.19.-)	432533	434539
fig|6666666.161614.peg.1064	CDS	gi_957788176_gb_LMYF01000004_1_Hypsibius_dujardini_scaffold4	434569	436158	1590	Beta-lactamase class C and other penicillin binding proteins	Beta-lactamase	434569	436158
fig|6666666.161614.peg.1065	CDS	gi_957788176_gb_LMYF01000004_1_Hypsibius_dujardini_scaffold4	437444	436164	1281	Beta-lactamase class C and other penicillin binding proteins	Beta-lactamase	436164	437444
fig|6666666.161614.peg.1066	CDS	gi_957788176_gb_LMYF01000004_1_Hypsibius_dujardini_scaffold4	438694	437543	1152	hypothetical protein	- none -	437543	438694
fig|6666666.161614.peg.1067	CDS	gi_957788176_gb_LMYF01000004_1_Hypsibius_dujardini_scaffold4	440388	438826	1563	Dihydroorotase (EC 3.5.2.3)	De Novo Pyrimidine Synthesis	438826	440388
fig|6666666.161614.peg.1068	CDS	gi_957788176_gb_LMYF01000004_1_Hypsibius_dujardini_scaffold4	441638	440445	1194	Membrane protein, putative	- none -	440445	441638
fig|6666666.161614.peg.1069	CDS	gi_957788176_gb_LMYF01000004_1_Hypsibius_dujardini_scaffold4	443058	441664	1395	hypothetical protein	- none -	441664	443058
fig|6666666.161614.peg.1070	CDS	gi_957788176_gb_LMYF01000004_1_Hypsibius_dujardini_scaffold4	443660	443169	492	Microcystin dependent protein	- none -	443169	443660
fig|6666666.161614.peg.1071	CDS	gi_957788176_gb_LMYF01000004_1_Hypsibius_dujardini_scaffold4	445026	443869	1158	D-AMINOPEPTIDASE (EC 3.4.11.19)	- none -	443869	445026
fig|6666666.161614.peg.1072	CDS	gi_957788176_gb_LMYF01000004_1_Hypsibius_dujardini_scaffold4	445486	445037	450	hypothetical protein	- none -	445037	445486
fig|6666666.161614.peg.1073	CDS	gi_957788176_gb_LMYF01000004_1_Hypsibius_dujardini_scaffold4	446117	445500	618	membrane protein, putative	- none -	445500	446117
fig|6666666.161614.peg.1074	CDS	gi_957788176_gb_LMYF01000004_1_Hypsibius_dujardini_scaffold4	447909	446128	1782	protein of unknown function DUF885	- none -	446128	447909
fig|6666666.161614.peg.1075	CDS	gi_957788176_gb_LMYF01000004_1_Hypsibius_dujardini_scaffold4	449007	447958	1050	hypothetical protein	- none -	447958	449007
fig|6666666.161614.peg.1076	CDS	gi_957788176_gb_LMYF01000004_1_Hypsibius_dujardini_scaffold4	450519	449023	1497	N-acyl-D-aspartate/D-glutamate deacylase	- none -	449023	450519
fig|6666666.161614.peg.1077	CDS	gi_957788176_gb_LMYF01000004_1_Hypsibius_dujardini_scaffold4	451229	450567	663	hypothetical protein	- none -	450567	451229
fig|6666666.161614.peg.1078	CDS	gi_957788176_gb_LMYF01000004_1_Hypsibius_dujardini_scaffold4	452432	451239	1194	Membrane protein, putative	- none -	451239	452432
fig|6666666.161614.peg.1079	CDS	gi_957788176_gb_LMYF01000004_1_Hypsibius_dujardini_scaffold4	453212	452442	771	hypothetical protein	- none -	452442	453212
fig|6666666.161614.peg.1080	CDS	gi_957788176_gb_LMYF01000004_1_Hypsibius_dujardini_scaffold4	454036	453284	753	hypothetical protein	- none -	453284	454036
fig|6666666.161614.peg.1081	CDS	gi_957788176_gb_LMYF01000004_1_Hypsibius_dujardini_scaffold4	454818	454048	771	hypothetical protein	- none -	454048	454818
fig|6666666.161614.peg.1082	CDS	gi_957788176_gb_LMYF01000004_1_Hypsibius_dujardini_scaffold4	455562	454822	741	hypothetical protein	- none -	454822	455562
fig|6666666.161614.peg.1083	CDS	gi_957788176_gb_LMYF01000004_1_Hypsibius_dujardini_scaffold4	456640	455591	1050	Beta-lactamase (EC 3.5.2.6)	Beta-lactamase	455591	456640
fig|6666666.161614.peg.1084	CDS	gi_957788176_gb_LMYF01000004_1_Hypsibius_dujardini_scaffold4	456772	456650	123	hypothetical protein	- none -	456650	456772
fig|6666666.161614.peg.1085	CDS	gi_957788176_gb_LMYF01000004_1_Hypsibius_dujardini_scaffold4	457729	456986	744	hypothetical protein	- none -	456986	457729
fig|6666666.161614.peg.1086	CDS	gi_957788176_gb_LMYF01000004_1_Hypsibius_dujardini_scaffold4	457962	462059	4098	Two-component system sensor histidine kinase/response regulator hybrid	- none -	457962	462059
fig|6666666.161614.peg.1087	CDS	gi_957788176_gb_LMYF01000004_1_Hypsibius_dujardini_scaffold4	463496	462126	1371	hypothetical protein	- none -	462126	463496
fig|6666666.161614.peg.1088	CDS	gi_957788176_gb_LMYF01000004_1_Hypsibius_dujardini_scaffold4	463640	463855	216	hypothetical protein	- none -	463640	463855
fig|6666666.161614.peg.1089	CDS	gi_957788176_gb_LMYF01000004_1_Hypsibius_dujardini_scaffold4	464944	463976	969	D-alanine-D-alanine ligase	- none -	463976	464944
fig|6666666.161614.peg.1090	CDS	gi_957788176_gb_LMYF01000004_1_Hypsibius_dujardini_scaffold4	465740	465012	729	hypothetical protein	- none -	465012	465740
fig|6666666.161614.peg.1091	CDS	gi_957788176_gb_LMYF01000004_1_Hypsibius_dujardini_scaffold4	466216	465728	489	hypothetical protein	- none -	465728	466216
fig|6666666.161614.peg.1092	CDS	gi_957788176_gb_LMYF01000004_1_Hypsibius_dujardini_scaffold4	466610	466221	390	hypothetical protein	- none -	466221	466610
fig|6666666.161614.peg.1093	CDS	gi_957788176_gb_LMYF01000004_1_Hypsibius_dujardini_scaffold4	467072	466632	441	hypothetical protein	- none -	466632	467072
fig|6666666.161614.peg.1094	CDS	gi_957788176_gb_LMYF01000004_1_Hypsibius_dujardini_scaffold4	467529	467092	438	hypothetical protein	- none -	467092	467529
fig|6666666.161614.peg.1095	CDS	gi_957788176_gb_LMYF01000004_1_Hypsibius_dujardini_scaffold4	468523	467609	915	hypothetical protein	- none -	467609	468523
fig|6666666.161614.peg.1096	CDS	gi_957788176_gb_LMYF01000004_1_Hypsibius_dujardini_scaffold4	468979	468527	453	Probable secreted protein	- none -	468527	468979
fig|6666666.161614.peg.1097	CDS	gi_957788176_gb_LMYF01000004_1_Hypsibius_dujardini_scaffold4	469343	469068	276	hypothetical protein	- none -	469068	469343
fig|6666666.161614.peg.1098	CDS	gi_957788176_gb_LMYF01000004_1_Hypsibius_dujardini_scaffold4	469939	469355	585	sigma factor	- none -	469355	469939
fig|6666666.161614.peg.1099	CDS	gi_957788176_gb_LMYF01000004_1_Hypsibius_dujardini_scaffold4	470432	469998	435	Acetyltransferase, GNAT family	- none -	469998	470432
fig|6666666.161614.peg.1100	CDS	gi_957788176_gb_LMYF01000004_1_Hypsibius_dujardini_scaffold4	470877	470464	414	Glyoxalase family protein	- none -	470464	470877
fig|6666666.161614.peg.1101	CDS	gi_957788176_gb_LMYF01000004_1_Hypsibius_dujardini_scaffold4	471645	471106	540	hypothetical protein	- none -	471106	471645
fig|6666666.161614.peg.1102	CDS	gi_957788176_gb_LMYF01000004_1_Hypsibius_dujardini_scaffold4	472854	471751	1104	Glycosyl hydrolase, BNR repeat precursor	- none -	471751	472854
fig|6666666.161614.peg.1103	CDS	gi_957788176_gb_LMYF01000004_1_Hypsibius_dujardini_scaffold4	472982	473869	888	Transcriptional regulatory protein rprY	- none -	472982	473869
fig|6666666.161614.peg.1104	CDS	gi_957788176_gb_LMYF01000004_1_Hypsibius_dujardini_scaffold4	474130	473897	234	hypothetical protein	- none -	473897	474130
fig|6666666.161614.peg.1105	CDS	gi_957788176_gb_LMYF01000004_1_Hypsibius_dujardini_scaffold4	474694	474413	282	hypothetical protein	- none -	474413	474694
fig|6666666.161614.peg.1106	CDS	gi_957788176_gb_LMYF01000004_1_Hypsibius_dujardini_scaffold4	476763	475711	1053	hypothetical protein	- none -	475711	476763
fig|6666666.161614.peg.1107	CDS	gi_957788176_gb_LMYF01000004_1_Hypsibius_dujardini_scaffold4	477357	476812	546	hypothetical protein	- none -	476812	477357
fig|6666666.161614.peg.1108	CDS	gi_957788176_gb_LMYF01000004_1_Hypsibius_dujardini_scaffold4	478877	477360	1518	Beta-lactamase (EC 3.5.2.6)	Beta-lactamase	477360	478877
fig|6666666.161614.peg.1109	CDS	gi_957788176_gb_LMYF01000004_1_Hypsibius_dujardini_scaffold4	479545	478874	672	Integral membrane protein	- none -	478874	479545
fig|6666666.161614.peg.1110	CDS	gi_957788176_gb_LMYF01000004_1_Hypsibius_dujardini_scaffold4	480373	479612	762	hypothetical protein	- none -	479612	480373
fig|6666666.161614.peg.1111	CDS	gi_957788176_gb_LMYF01000004_1_Hypsibius_dujardini_scaffold4	481357	480422	936	Phosphoribosylglycinamide formyltransferase (EC 2.1.2.2)	5-FCL-like protein, De Novo Purine Biosynthesis	480422	481357
fig|6666666.161614.peg.1112	CDS	gi_957788176_gb_LMYF01000004_1_Hypsibius_dujardini_scaffold4	481651	482922	1272	Molybdopterin oxidoreductase subunit, predicted; chaperone protein HtpG	CBSS-269799.3.peg.2220	481651	482922
fig|6666666.161614.peg.1113	CDS	gi_957788176_gb_LMYF01000004_1_Hypsibius_dujardini_scaffold4	482990	486163	3174	Molybdopterin oxidoreductase, iron-sulfur binding subunit (EC 1.2.7.-)	CBSS-269799.3.peg.2220	482990	486163
fig|6666666.161614.peg.1114	CDS	gi_957788176_gb_LMYF01000004_1_Hypsibius_dujardini_scaffold4	486246	487700	1455	Molybdopterin oxidoreductase (EC 1.2.7.-)	CBSS-269799.3.peg.2220	486246	487700
fig|6666666.161614.peg.1115	CDS	gi_957788176_gb_LMYF01000004_1_Hypsibius_dujardini_scaffold4	487812	488402	591	ABC-type Fe3+ transport system protein; Molybdenum transport protein, putative	CBSS-269799.3.peg.2220, CBSS-269799.3.peg.2220	487812	488402
fig|6666666.161614.peg.1116	CDS	gi_957788176_gb_LMYF01000004_1_Hypsibius_dujardini_scaffold4	488419	489057	639	hypothetical protein	- none -	488419	489057
fig|6666666.161614.peg.1117	CDS	gi_957788176_gb_LMYF01000004_1_Hypsibius_dujardini_scaffold4	489155	490339	1185	Putative uncharacterized protein TTHA1760	CBSS-269799.3.peg.2220	489155	490339
fig|6666666.161614.peg.1118	CDS	gi_957788176_gb_LMYF01000004_1_Hypsibius_dujardini_scaffold4	490402	491463	1062	Cytochrome c oxidase polypeptide II (EC 1.9.3.1)	CBSS-316057.3.peg.563, Terminal cytochrome C oxidases	490402	491463
fig|6666666.161614.peg.1119	CDS	gi_957788176_gb_LMYF01000004_1_Hypsibius_dujardini_scaffold4	491508	493319	1812	Cytochrome c oxidase polypeptide I (EC 1.9.3.1)	Terminal cytochrome C oxidases	491508	493319
fig|6666666.161614.peg.1120	CDS	gi_957788176_gb_LMYF01000004_1_Hypsibius_dujardini_scaffold4	493381	494256	876	Heme O synthase, protoheme IX farnesyltransferase (EC 2.5.1.-) COX10-CtaB	Biogenesis of cytochrome c oxidases, CBSS-316057.3.peg.563	493381	494256
fig|6666666.161614.peg.1121	CDS	gi_957788176_gb_LMYF01000004_1_Hypsibius_dujardini_scaffold4	494354	494842	489	Alternative cytochrome c oxidase polypeptide CoxO (EC 1.9.3.1); Cytochrome c oxidase, subunit III (EC 1.9.3.1)	Terminal cytochrome C oxidases	494354	494842
fig|6666666.161614.peg.1122	CDS	gi_957788176_gb_LMYF01000004_1_Hypsibius_dujardini_scaffold4	494879	495751	873	Alternative cytochrome c oxidase polypeptide CoxP (EC 1.9.3.1)	Terminal cytochrome C oxidases	494879	495751
fig|6666666.161614.peg.1123	CDS	gi_957788176_gb_LMYF01000004_1_Hypsibius_dujardini_scaffold4	495776	496270	495	hypothetical protein	- none -	495776	496270
fig|6666666.161614.peg.1124	CDS	gi_957788176_gb_LMYF01000004_1_Hypsibius_dujardini_scaffold4	496399	497226	828	Cytochrome oxidase biogenesis protein Sco1/SenC/PrrC, putative copper metallochaperone	Biogenesis of cytochrome c oxidases	496399	497226
fig|6666666.161614.peg.1125	CDS	gi_957788176_gb_LMYF01000004_1_Hypsibius_dujardini_scaffold4	497198	497740	543	hypothetical protein	- none -	497198	497740
fig|6666666.161614.peg.1126	CDS	gi_957788176_gb_LMYF01000004_1_Hypsibius_dujardini_scaffold4	498224	497805	420	hypothetical protein	- none -	497805	498224
fig|6666666.161614.peg.1127	CDS	gi_957788176_gb_LMYF01000004_1_Hypsibius_dujardini_scaffold4	498653	498264	390	Methylated-DNA-[protein]-cysteine S-methyltransferase	- none -	498264	498653
fig|6666666.161614.peg.1128	CDS	gi_957788176_gb_LMYF01000004_1_Hypsibius_dujardini_scaffold4	498871	498680	192	hypothetical protein	- none -	498680	498871
fig|6666666.161614.peg.1129	CDS	gi_957788176_gb_LMYF01000004_1_Hypsibius_dujardini_scaffold4	499643	498855	789	tRNA (guanine46-N7-)-methyltransferase (EC 2.1.1.33)	RNA methylation	498855	499643
fig|6666666.161614.peg.1130	CDS	gi_957788176_gb_LMYF01000004_1_Hypsibius_dujardini_scaffold4	500572	499643	930	hypothetical protein	- none -	499643	500572
fig|6666666.161614.peg.1131	CDS	gi_957788176_gb_LMYF01000004_1_Hypsibius_dujardini_scaffold4	501762	500611	1152	hypothetical protein	- none -	500611	501762
fig|6666666.161614.peg.1132	CDS	gi_957788176_gb_LMYF01000004_1_Hypsibius_dujardini_scaffold4	502170	502634	465	transcriptional regulator, AsnC family	- none -	502170	502634
fig|6666666.161614.peg.1133	CDS	gi_957788176_gb_LMYF01000004_1_Hypsibius_dujardini_scaffold4	502649	504091	1443	Membrane protein involved in the export of O-antigen, teichoic acid lipoteichoic acids	- none -	502649	504091
fig|6666666.161614.peg.1134	CDS	gi_957788176_gb_LMYF01000004_1_Hypsibius_dujardini_scaffold4	504160	504960	801	hypothetical protein	- none -	504160	504960
fig|6666666.161614.peg.1135	CDS	gi_957788176_gb_LMYF01000004_1_Hypsibius_dujardini_scaffold4	504957	506411	1455	hypothetical protein	- none -	504957	506411
fig|6666666.161614.peg.1136	CDS	gi_957788176_gb_LMYF01000004_1_Hypsibius_dujardini_scaffold4	507464	506376	1089	Dipeptide transport system permease protein DppC (TC 3.A.1.5.2)	ABC transporter dipeptide (TC 3.A.1.5.2)	506376	507464
fig|6666666.161614.peg.1137	CDS	gi_957788176_gb_LMYF01000004_1_Hypsibius_dujardini_scaffold4	508634	507507	1128	N-acetylglucosaminyltransferase (EC 2.4.1.-)	- none -	507507	508634
fig|6666666.161614.peg.1138	CDS	gi_957788176_gb_LMYF01000004_1_Hypsibius_dujardini_scaffold4	509229	508651	579	2-hydroxy-6-oxo-6-phenylhexa-2,4-dienoate hydrolase (EC 3.7.1.-)	- none -	508651	509229
fig|6666666.161614.peg.1139	CDS	gi_957788176_gb_LMYF01000004_1_Hypsibius_dujardini_scaffold4	509293	509463	171	hypothetical protein	- none -	509293	509463
fig|6666666.161614.peg.1140	CDS	gi_957788176_gb_LMYF01000004_1_Hypsibius_dujardini_scaffold4	510790	509546	1245	hypothetical protein	- none -	509546	510790
fig|6666666.161614.peg.1141	CDS	gi_957788176_gb_LMYF01000004_1_Hypsibius_dujardini_scaffold4	510993	511433	441	Transcriptional regulator, MarR family	- none -	510993	511433
fig|6666666.161614.peg.1142	CDS	gi_957788176_gb_LMYF01000004_1_Hypsibius_dujardini_scaffold4	511456	513249	1794	Butyryl-CoA dehydrogenase (EC 1.3.8.1)	5-FCL-like protein, Acetyl-CoA fermentation to Butyrate, Anaerobic respiratory reductases, Butanol Biosynthesis, Isoleucine degradation, Valine degradation	511456	513249
fig|6666666.161614.peg.1143	CDS	gi_957788176_gb_LMYF01000004_1_Hypsibius_dujardini_scaffold4	513998	513246	753	hypothetical protein	- none -	513246	513998
fig|6666666.161614.peg.1144	CDS	gi_957788176_gb_LMYF01000004_1_Hypsibius_dujardini_scaffold4	514109	514258	150	hypothetical protein	- none -	514109	514258
fig|6666666.161614.peg.1145	CDS	gi_957788176_gb_LMYF01000004_1_Hypsibius_dujardini_scaffold4	514601	514212	390	Peptidase, M16 family	- none -	514212	514601
fig|6666666.161614.peg.1146	CDS	gi_957788176_gb_LMYF01000004_1_Hypsibius_dujardini_scaffold4	514774	515121	348	hypothetical protein	- none -	514774	515121
fig|6666666.161614.peg.1147	CDS	gi_957788176_gb_LMYF01000004_1_Hypsibius_dujardini_scaffold4	515209	516237	1029	2-oxoglutarate oxidoreductase, beta subunit (EC 1.2.7.3)	- none -	515209	516237
fig|6666666.161614.peg.1148	CDS	gi_957788176_gb_LMYF01000004_1_Hypsibius_dujardini_scaffold4	516882	516244	639	hypothetical protein	- none -	516244	516882
fig|6666666.161614.peg.1149	CDS	gi_957788176_gb_LMYF01000004_1_Hypsibius_dujardini_scaffold4	517800	516922	879	Jumonji domain containing 5	- none -	516922	517800
fig|6666666.161614.peg.1150	CDS	gi_957788176_gb_LMYF01000004_1_Hypsibius_dujardini_scaffold4	517905	518513	609	Sua5 YciO YrdC YwlC family protein	- none -	517905	518513
fig|6666666.161614.peg.1151	CDS	gi_957788176_gb_LMYF01000004_1_Hypsibius_dujardini_scaffold4	518904	518602	303	hypothetical protein	- none -	518602	518904
fig|6666666.161614.peg.1152	CDS	gi_957788176_gb_LMYF01000004_1_Hypsibius_dujardini_scaffold4	519591	518995	597	Ribonuclease HII (EC 3.1.26.4)	Ribonuclease H, Ribonucleases in Bacillus	518995	519591
fig|6666666.161614.peg.1153	CDS	gi_957788176_gb_LMYF01000004_1_Hypsibius_dujardini_scaffold4	519666	520736	1071	Heme A synthase, cytochrome oxidase biogenesis protein Cox15-CtaA	Biogenesis of cytochrome c oxidases	519666	520736
fig|6666666.161614.peg.1154	CDS	gi_957788176_gb_LMYF01000004_1_Hypsibius_dujardini_scaffold4	520812	523067	2256	hypothetical protein	- none -	520812	523067
fig|6666666.161614.peg.1155	CDS	gi_957788176_gb_LMYF01000004_1_Hypsibius_dujardini_scaffold4	523944	523054	891	Transcription regulator [contains diacylglycerol kinase catalytic domain]	- none -	523054	523944
fig|6666666.161614.peg.1156	CDS	gi_957788176_gb_LMYF01000004_1_Hypsibius_dujardini_scaffold4	524367	523948	420	hypothetical protein	- none -	523948	524367
fig|6666666.161614.peg.1157	CDS	gi_957788176_gb_LMYF01000004_1_Hypsibius_dujardini_scaffold4	525471	524422	1050	3-oxoacyl-[acyl-carrier-protein] synthase, KASIII (EC 2.3.1.41)	Fatty Acid Biosynthesis FASII	524422	525471
fig|6666666.161614.peg.1158	CDS	gi_957788176_gb_LMYF01000004_1_Hypsibius_dujardini_scaffold4	526156	525632	525	hypothetical protein	- none -	525632	526156
fig|6666666.161614.peg.1159	CDS	gi_957788176_gb_LMYF01000004_1_Hypsibius_dujardini_scaffold4	526302	526168	135	hypothetical protein	- none -	526168	526302
fig|6666666.161614.peg.1160	CDS	gi_957788176_gb_LMYF01000004_1_Hypsibius_dujardini_scaffold4	526344	528356	2013	Sensor histidine kinase	- none -	526344	528356
fig|6666666.161614.peg.1161	CDS	gi_957788176_gb_LMYF01000004_1_Hypsibius_dujardini_scaffold4	528362	529108	747	Response regulator	- none -	528362	529108
fig|6666666.161614.peg.1162	CDS	gi_957788176_gb_LMYF01000004_1_Hypsibius_dujardini_scaffold4	529428	529553	126	hypothetical protein	- none -	529428	529553
fig|6666666.161614.peg.1163	CDS	gi_957788176_gb_LMYF01000004_1_Hypsibius_dujardini_scaffold4	530490	530068	423	hypothetical protein	- none -	530068	530490
fig|6666666.161614.peg.1164	CDS	gi_957788176_gb_LMYF01000004_1_Hypsibius_dujardini_scaffold4	530478	530603	126	hypothetical protein	- none -	530478	530603
fig|6666666.161614.peg.1165	CDS	gi_957788176_gb_LMYF01000004_1_Hypsibius_dujardini_scaffold4	530957	530568	390	hypothetical protein	- none -	530568	530957
fig|6666666.161614.peg.1166	CDS	gi_957788176_gb_LMYF01000004_1_Hypsibius_dujardini_scaffold4	531995	530967	1029	acetyltransferase, GNAT family	- none -	530967	531995
fig|6666666.161614.peg.1167	CDS	gi_957788176_gb_LMYF01000004_1_Hypsibius_dujardini_scaffold4	532909	532013	897	Mrr restriction system protein	- none -	532013	532909
fig|6666666.161614.peg.1168	CDS	gi_957788176_gb_LMYF01000004_1_Hypsibius_dujardini_scaffold4	533538	533149	390	hypothetical protein	- none -	533149	533538
fig|6666666.161614.peg.1169	CDS	gi_957788176_gb_LMYF01000004_1_Hypsibius_dujardini_scaffold4	534266	533637	630	hypothetical protein	- none -	533637	534266
fig|6666666.161614.peg.1170	CDS	gi_957788176_gb_LMYF01000004_1_Hypsibius_dujardini_scaffold4	534636	534496	141	hypothetical protein	- none -	534496	534636
fig|6666666.161614.peg.1171	CDS	gi_957788176_gb_LMYF01000004_1_Hypsibius_dujardini_scaffold4	535974	535462	513	hypothetical protein	- none -	535462	535974
fig|6666666.161614.peg.1172	CDS	gi_957788176_gb_LMYF01000004_1_Hypsibius_dujardini_scaffold4	537219	536080	1140	Methyl-accepting chemotaxis protein	- none -	536080	537219
fig|6666666.161614.peg.1173	CDS	gi_957788176_gb_LMYF01000004_1_Hypsibius_dujardini_scaffold4	539252	537885	1368	oxidoreductase family protein	- none -	537885	539252
fig|6666666.161614.peg.1174	CDS	gi_957788176_gb_LMYF01000004_1_Hypsibius_dujardini_scaffold4	539402	539265	138	hypothetical protein	- none -	539265	539402
fig|6666666.161614.peg.1175	CDS	gi_957788176_gb_LMYF01000004_1_Hypsibius_dujardini_scaffold4	539401	540483	1083	N-acetylglucosamine related transporter, NagX	Chitin and N-acetylglucosamine utilization	539401	540483
fig|6666666.161614.peg.1176	CDS	gi_957788176_gb_LMYF01000004_1_Hypsibius_dujardini_scaffold4	541482	540484	999	Mll0351 protein	- none -	540484	541482
fig|6666666.161614.peg.1177	CDS	gi_957788176_gb_LMYF01000004_1_Hypsibius_dujardini_scaffold4	543680	541566	2115	Glycosyl transferase, family 2	- none -	541566	543680
fig|6666666.161614.peg.1178	CDS	gi_957788176_gb_LMYF01000004_1_Hypsibius_dujardini_scaffold4	543911	544222	312	hypothetical protein	- none -	543911	544222
fig|6666666.161614.peg.1179	CDS	gi_957788176_gb_LMYF01000004_1_Hypsibius_dujardini_scaffold4	544251	546077	1827	GTP-binding protein TypA/BipA	- none -	544251	546077
fig|6666666.161614.peg.1180	CDS	gi_957788176_gb_LMYF01000004_1_Hypsibius_dujardini_scaffold4	546213	546094	120	hypothetical protein	- none -	546094	546213
fig|6666666.161614.peg.1181	CDS	gi_957788176_gb_LMYF01000004_1_Hypsibius_dujardini_scaffold4	546223	548313	2091	MORN motif family protein	- none -	546223	548313
fig|6666666.161614.peg.1182	CDS	gi_957788176_gb_LMYF01000004_1_Hypsibius_dujardini_scaffold4	548370	548591	222	hypothetical protein	- none -	548370	548591
fig|6666666.161614.peg.1183	CDS	gi_957788176_gb_LMYF01000004_1_Hypsibius_dujardini_scaffold4	548663	551080	2418	hypothetical protein	- none -	548663	551080
fig|6666666.161614.peg.1184	CDS	gi_957788176_gb_LMYF01000004_1_Hypsibius_dujardini_scaffold4	552918	551077	1842	hypothetical protein	- none -	551077	552918
fig|6666666.161614.peg.1185	CDS	gi_957788176_gb_LMYF01000004_1_Hypsibius_dujardini_scaffold4	553989	553093	897	putative periplasmic protein kinase ArgK and related GTPases of G3E family	G3E family of P-loop GTPases (metallocenter biosynthesis)	553093	553989
fig|6666666.161614.peg.1186	CDS	gi_957788176_gb_LMYF01000004_1_Hypsibius_dujardini_scaffold4	554023	555258	1236	hypothetical protein	- none -	554023	555258
fig|6666666.161614.peg.1187	CDS	gi_957788176_gb_LMYF01000004_1_Hypsibius_dujardini_scaffold4	555272	556042	771	glycosyl transferase, group 2 family protein	- none -	555272	556042
fig|6666666.161614.peg.1188	CDS	gi_957788176_gb_LMYF01000004_1_Hypsibius_dujardini_scaffold4	556086	556727	642	ATP-dependent protease La domain protein	- none -	556086	556727
fig|6666666.161614.peg.1189	CDS	gi_957788176_gb_LMYF01000004_1_Hypsibius_dujardini_scaffold4	556748	557476	729	Pantothenate kinase type III, CoaX-like (EC 2.7.1.33)	Coenzyme A Biosynthesis, Coenzyme A Biosynthesis cluster	556748	557476
fig|6666666.161614.peg.1190	CDS	gi_957788176_gb_LMYF01000004_1_Hypsibius_dujardini_scaffold4	557448	558896	1449	putative outer membrane protein	- none -	557448	558896
fig|6666666.161614.peg.1191	CDS	gi_957788176_gb_LMYF01000004_1_Hypsibius_dujardini_scaffold4	558940	559464	525	hypothetical protein	- none -	558940	559464
fig|6666666.161614.peg.1192	CDS	gi_957788176_gb_LMYF01000004_1_Hypsibius_dujardini_scaffold4	559578	559465	114	hypothetical protein	- none -	559465	559578
fig|6666666.161614.peg.1193	CDS	gi_957788176_gb_LMYF01000004_1_Hypsibius_dujardini_scaffold4	559852	560673	822	Short chain dehydrogenase family protein	- none -	559852	560673
fig|6666666.161614.peg.1194	CDS	gi_957788176_gb_LMYF01000004_1_Hypsibius_dujardini_scaffold4	562366	560723	1644	Lysyl-tRNA synthetase (class II) (EC 6.1.1.6)	tRNA aminoacylation, Lys	560723	562366
fig|6666666.161614.peg.1195	CDS	gi_957788176_gb_LMYF01000004_1_Hypsibius_dujardini_scaffold4	562488	563204	717	hypothetical protein	- none -	562488	563204
fig|6666666.161614.peg.1196	CDS	gi_957788176_gb_LMYF01000004_1_Hypsibius_dujardini_scaffold4	563929	563288	642	hypothetical protein	- none -	563288	563929
fig|6666666.161614.peg.1197	CDS	gi_957788176_gb_LMYF01000004_1_Hypsibius_dujardini_scaffold4	565094	564213	882	hypothetical protein	- none -	564213	565094
fig|6666666.161614.peg.1198	CDS	gi_957788176_gb_LMYF01000004_1_Hypsibius_dujardini_scaffold4	565273	565989	717	hypothetical protein	- none -	565273	565989
fig|6666666.161614.peg.1199	CDS	gi_957788176_gb_LMYF01000004_1_Hypsibius_dujardini_scaffold4	566715	566110	606	hypothetical protein	- none -	566110	566715
fig|6666666.161614.peg.1200	CDS	gi_957788176_gb_LMYF01000004_1_Hypsibius_dujardini_scaffold4	567586	566930	657	hypothetical protein	- none -	566930	567586
fig|6666666.161614.peg.1201	CDS	gi_957788176_gb_LMYF01000004_1_Hypsibius_dujardini_scaffold4	568650	567643	1008	Fumarylacetoacetase (EC 3.7.1.2)	Homogentisate pathway of aromatic compound degradation, Pterin carbinolamine dehydratase, Salicylate and gentisate catabolism	567643	568650
fig|6666666.161614.peg.1202	CDS	gi_957788176_gb_LMYF01000004_1_Hypsibius_dujardini_scaffold4	568704	571256	2553	FIG01093606: hypothetical protein	- none -	568704	571256
fig|6666666.161614.peg.1203	CDS	gi_957788176_gb_LMYF01000004_1_Hypsibius_dujardini_scaffold4	571298	572008	711	fatty acid hydroxylase	- none -	571298	572008
fig|6666666.161614.peg.1204	CDS	gi_957788176_gb_LMYF01000004_1_Hypsibius_dujardini_scaffold4	572336	572016	321	hypothetical protein	- none -	572016	572336
fig|6666666.161614.peg.1205	CDS	gi_957788176_gb_LMYF01000004_1_Hypsibius_dujardini_scaffold4	573105	572341	765	hypothetical protein	- none -	572341	573105
fig|6666666.161614.peg.1206	CDS	gi_957788176_gb_LMYF01000004_1_Hypsibius_dujardini_scaffold4	573261	573115	147	hypothetical protein	- none -	573115	573261
fig|6666666.161614.peg.1207	CDS	gi_957788176_gb_LMYF01000004_1_Hypsibius_dujardini_scaffold4	574506	573421	1086	Beta-lactamase (EC 3.5.2.6)	Beta-lactamase	573421	574506
fig|6666666.161614.peg.1208	CDS	gi_957788176_gb_LMYF01000004_1_Hypsibius_dujardini_scaffold4	575629	574508	1122	Cystathionine gamma-lyase (EC 4.4.1.1)	Cysteine Biosynthesis, Glycine and Serine Utilization, Methionine Biosynthesis, Methionine Degradation	574508	575629
fig|6666666.161614.peg.1209	CDS	gi_957788176_gb_LMYF01000004_1_Hypsibius_dujardini_scaffold4	575952	576398	447	hypothetical protein	- none -	575952	576398
fig|6666666.161614.peg.1210	CDS	gi_957788176_gb_LMYF01000004_1_Hypsibius_dujardini_scaffold4	578331	576484	1848	Asparagine synthetase [glutamine-hydrolyzing] (EC 6.3.5.4)	Cyanophycin Metabolism, Glutamine, Glutamate, Aspartate and Asparagine Biosynthesis	576484	578331
fig|6666666.161614.peg.1211	CDS	gi_957788176_gb_LMYF01000004_1_Hypsibius_dujardini_scaffold4	578847	578380	468	hypothetical protein	- none -	578380	578847
fig|6666666.161614.peg.1212	CDS	gi_957788176_gb_LMYF01000004_1_Hypsibius_dujardini_scaffold4	578846	579043	198	hypothetical protein	- none -	578846	579043
fig|6666666.161614.peg.1213	CDS	gi_957788176_gb_LMYF01000004_1_Hypsibius_dujardini_scaffold4	579624	579040	585	hypothetical protein	- none -	579040	579624
fig|6666666.161614.peg.1214	CDS	gi_957788176_gb_LMYF01000004_1_Hypsibius_dujardini_scaffold4	580293	579694	600	Acyl carrier protein phosphodiesterase (EC 3.1.4.14)	Fatty Acid Biosynthesis FASII	579694	580293
fig|6666666.161614.peg.1215	CDS	gi_957788176_gb_LMYF01000004_1_Hypsibius_dujardini_scaffold4	581597	580299	1299	Hydrolase, alpha/beta fold family	- none -	580299	581597
fig|6666666.161614.peg.1216	CDS	gi_957788176_gb_LMYF01000004_1_Hypsibius_dujardini_scaffold4	582272	581604	669	FIG038982: hypothetical protein	CBSS-279010.5.peg.1134	581604	582272
fig|6666666.161614.peg.1217	CDS	gi_957788176_gb_LMYF01000004_1_Hypsibius_dujardini_scaffold4	582538	582275	264	FIG004131: Transcriptional regulator, ArsR family	CBSS-279010.5.peg.1134	582275	582538
fig|6666666.161614.peg.1218	CDS	gi_957788176_gb_LMYF01000004_1_Hypsibius_dujardini_scaffold4	582809	583243	435	hypothetical protein	- none -	582809	583243
fig|6666666.161614.peg.1219	CDS	gi_957788176_gb_LMYF01000004_1_Hypsibius_dujardini_scaffold4	583451	583888	438	hypothetical protein	- none -	583451	583888
fig|6666666.161614.peg.1220	CDS	gi_957788176_gb_LMYF01000004_1_Hypsibius_dujardini_scaffold4	584033	585007	975	Deoxyhypusine synthase (EC 2.5.1.46)	Alkaloid biosynthesis from L-lysine, Modification of eukaryotic initiation factor 5A	584033	585007
fig|6666666.161614.peg.1221	CDS	gi_957788176_gb_LMYF01000004_1_Hypsibius_dujardini_scaffold4	585514	585080	435	hypothetical protein	- none -	585080	585514
fig|6666666.161614.peg.1222	CDS	gi_957788176_gb_LMYF01000004_1_Hypsibius_dujardini_scaffold4	587168	585627	1542	Aminopeptidase	- none -	585627	587168
fig|6666666.161614.peg.1223	CDS	gi_957788176_gb_LMYF01000004_1_Hypsibius_dujardini_scaffold4	587699	587244	456	Ribose 5-phosphate isomerase B (EC 5.3.1.6)	D-ribose utilization, Pentose phosphate pathway	587244	587699
fig|6666666.161614.peg.1224	CDS	gi_957788176_gb_LMYF01000004_1_Hypsibius_dujardini_scaffold4	588622	587777	846	Twin-arginine translocation protein TatC	Cluster-based Subsystem Grouping Hypotheticals - perhaps Proteosome Related, Twin-arginine translocation system	587777	588622
fig|6666666.161614.peg.1225	CDS	gi_957788176_gb_LMYF01000004_1_Hypsibius_dujardini_scaffold4	589950	588700	1251	protein of unknown function DUF21	- none -	588700	589950
fig|6666666.161614.peg.1226	CDS	gi_957788176_gb_LMYF01000004_1_Hypsibius_dujardini_scaffold4	590597	590019	579	Guanylate kinase (EC 2.7.4.8)	CBSS-323097.3.peg.2594, Purine conversions	590019	590597
fig|6666666.161614.peg.1227	CDS	gi_957788176_gb_LMYF01000004_1_Hypsibius_dujardini_scaffold4	591335	590649	687	Hydrolase, haloacid delahogenase-like family	- none -	590649	591335
fig|6666666.161614.peg.1228	CDS	gi_957788176_gb_LMYF01000004_1_Hypsibius_dujardini_scaffold4	592649	591339	1311	UDP-N-acetylglucosamine 1-carboxyvinyltransferase (EC 2.5.1.7)	Peptidoglycan Biosynthesis, UDP-N-acetylmuramate from Fructose-6-phosphate Biosynthesis	591339	592649
fig|6666666.161614.peg.1229	CDS	gi_957788176_gb_LMYF01000004_1_Hypsibius_dujardini_scaffold4	593587	592799	789	hypothetical protein	- none -	592799	593587
fig|6666666.161614.peg.1230	CDS	gi_957788176_gb_LMYF01000004_1_Hypsibius_dujardini_scaffold4	594895	593690	1206	TonB-dependent receptor	Ton and Tol transport systems	593690	594895
fig|6666666.161614.peg.1231	CDS	gi_957788176_gb_LMYF01000004_1_Hypsibius_dujardini_scaffold4	595203	596300	1098	Glycosyltransferase	- none -	595203	596300
fig|6666666.161614.peg.1232	CDS	gi_957788176_gb_LMYF01000004_1_Hypsibius_dujardini_scaffold4	596453	596683	231	gliding motility protein GldC	- none -	596453	596683
fig|6666666.161614.peg.1233	CDS	gi_957788176_gb_LMYF01000004_1_Hypsibius_dujardini_scaffold4	596704	597156	453	Transamidase GatB domain protein	- none -	596704	597156
fig|6666666.161614.peg.1234	CDS	gi_957788176_gb_LMYF01000004_1_Hypsibius_dujardini_scaffold4	597225	597767	543	hypothetical protein	- none -	597225	597767
fig|6666666.161614.peg.1235	CDS	gi_957788176_gb_LMYF01000004_1_Hypsibius_dujardini_scaffold4	597998	598774	777	2-hydroxy-6-oxo-6-phenylhexa-2,4-dienoate hydrolase (EC 3.7.1.-)	- none -	597998	598774
fig|6666666.161614.peg.1236	CDS	gi_957788176_gb_LMYF01000004_1_Hypsibius_dujardini_scaffold4	598888	599472	585	CBS	- none -	598888	599472
fig|6666666.161614.peg.1237	CDS	gi_957788176_gb_LMYF01000004_1_Hypsibius_dujardini_scaffold4	599548	601014	1467	hypothetical protein	- none -	599548	601014
fig|6666666.161614.peg.1238	CDS	gi_957788176_gb_LMYF01000004_1_Hypsibius_dujardini_scaffold4	600974	601894	921	NAD kinase (EC 2.7.1.23)	NAD and NADP cofactor biosynthesis global	600974	601894
fig|6666666.161614.peg.1239	CDS	gi_957788176_gb_LMYF01000004_1_Hypsibius_dujardini_scaffold4	601907	602830	924	FIG00906977: hypothetical protein	- none -	601907	602830
fig|6666666.161614.peg.1240	CDS	gi_957788176_gb_LMYF01000004_1_Hypsibius_dujardini_scaffold4	602976	603725	750	Undecaprenyl pyrophosphate synthetase (EC 2.5.1.31)	- none -	602976	603725
fig|6666666.161614.peg.1241	CDS	gi_957788176_gb_LMYF01000004_1_Hypsibius_dujardini_scaffold4	603922	606642	2721	Outer membrane protein assembly factor YaeT precursor	- none -	603922	606642
fig|6666666.161614.peg.1242	CDS	gi_957788176_gb_LMYF01000004_1_Hypsibius_dujardini_scaffold4	606682	607194	513	Outer membrane protein H precursor	Periplasmic Stress Response	606682	607194
fig|6666666.161614.peg.1243	CDS	gi_957788176_gb_LMYF01000004_1_Hypsibius_dujardini_scaffold4	607312	607881	570	Outer membrane protein H precursor	Periplasmic Stress Response	607312	607881
fig|6666666.161614.peg.1244	CDS	gi_957788176_gb_LMYF01000004_1_Hypsibius_dujardini_scaffold4	607922	608806	885	Glutamate racemase (EC 5.1.1.3)	Glutamine, Glutamate, Aspartate and Asparagine Biosynthesis, Peptidoglycan Biosynthesis	607922	608806
fig|6666666.161614.peg.1245	CDS	gi_957788176_gb_LMYF01000004_1_Hypsibius_dujardini_scaffold4	608825	609046	222	hypothetical protein	- none -	608825	609046
fig|6666666.161614.peg.1246	CDS	gi_957788176_gb_LMYF01000004_1_Hypsibius_dujardini_scaffold4	609049	609204	156	LSU ribosomal protein L34p	Cell Division Subsystem including YidCD, RNA modification cluster, Ribosome LSU bacterial	609049	609204
fig|6666666.161614.peg.1247	CDS	gi_957788176_gb_LMYF01000004_1_Hypsibius_dujardini_scaffold4	609286	609681	396	Ribonuclease P protein component (EC 3.1.26.5)	Cell Division Subsystem including YidCD, RNA modification cluster, tRNA processing	609286	609681
fig|6666666.161614.peg.1248	CDS	gi_957788176_gb_LMYF01000004_1_Hypsibius_dujardini_scaffold4	609656	609886	231	Protein YidD	Cell Division Subsystem including YidCD, RNA modification cluster	609656	609886
fig|6666666.161614.peg.1249	CDS	gi_957788176_gb_LMYF01000004_1_Hypsibius_dujardini_scaffold4	610359	609868	492	hypothetical protein	- none -	609868	610359
fig|6666666.161614.peg.1250	CDS	gi_957788176_gb_LMYF01000004_1_Hypsibius_dujardini_scaffold4	611266	610427	840	ADA regulatory protein / Methylated-DNA--protein-cysteine methyltransferase (EC 2.1.1.63)	DNA repair, bacterial, DNA repair, bacterial	610427	611266
fig|6666666.161614.peg.1251	CDS	gi_957788176_gb_LMYF01000004_1_Hypsibius_dujardini_scaffold4	611967	611365	603	Manganese superoxide dismutase (EC 1.15.1.1)	Oxidative stress, Protection from Reactive Oxygen Species	611365	611967
fig|6666666.161614.peg.1252	CDS	gi_957788176_gb_LMYF01000004_1_Hypsibius_dujardini_scaffold4	612369	612061	309	hypothetical protein	- none -	612061	612369
fig|6666666.161614.peg.1253	CDS	gi_957788176_gb_LMYF01000004_1_Hypsibius_dujardini_scaffold4	612810	612373	438	tRNA-specific adenosine-34 deaminase (EC 3.5.4.-)	tRNA processing	612373	612810
fig|6666666.161614.peg.1254	CDS	gi_957788176_gb_LMYF01000004_1_Hypsibius_dujardini_scaffold4	612853	614226	1374	Aldehyde dehydrogenase (EC 1.2.1.3)	Glycerolipid and Glycerophospholipid Metabolism in Bacteria, Methylglyoxal Metabolism, Methylglyoxal Metabolism, Pyruvate metabolism II: acetyl-CoA, acetogenesis from pyruvate	612853	614226
fig|6666666.161614.peg.1255	CDS	gi_957788176_gb_LMYF01000004_1_Hypsibius_dujardini_scaffold4	614237	614935	699	Glutathione peroxidase (EC 1.11.1.9)	Glutathione: Redox cycle	614237	614935
fig|6666666.161614.peg.1256	CDS	gi_957788176_gb_LMYF01000004_1_Hypsibius_dujardini_scaffold4	615004	615522	519	hypothetical protein	- none -	615004	615522
fig|6666666.161614.peg.1257	CDS	gi_957788176_gb_LMYF01000004_1_Hypsibius_dujardini_scaffold4	615525	615770	246	hypothetical protein	- none -	615525	615770
fig|6666666.161614.peg.1258	CDS	gi_957788176_gb_LMYF01000004_1_Hypsibius_dujardini_scaffold4	616807	615767	1041	tRNA dihydrouridine synthase B (EC 1.-.-.-)	- none -	615767	616807
fig|6666666.161614.peg.1259	CDS	gi_957788176_gb_LMYF01000004_1_Hypsibius_dujardini_scaffold4	616928	617845	918	Abortive infection protein	- none -	616928	617845
fig|6666666.161614.peg.1260	CDS	gi_957788176_gb_LMYF01000004_1_Hypsibius_dujardini_scaffold4	617854	618783	930	Phosphatidate cytidylyltransferase (EC 2.7.7.41)	Glycerolipid and Glycerophospholipid Metabolism in Bacteria	617854	618783
fig|6666666.161614.peg.1261	CDS	gi_957788176_gb_LMYF01000004_1_Hypsibius_dujardini_scaffold4	618817	619473	657	Phosphatidylserine decarboxylase (EC 4.1.1.65)	Glycerolipid and Glycerophospholipid Metabolism in Bacteria	618817	619473
fig|6666666.161614.peg.1262	CDS	gi_957788176_gb_LMYF01000004_1_Hypsibius_dujardini_scaffold4	620299	619589	711	2-haloalkanoic acid dehalogenase (EC 3.8.1.2)	- none -	619589	620299
fig|6666666.161614.peg.1263	CDS	gi_957788176_gb_LMYF01000004_1_Hypsibius_dujardini_scaffold4	620382	621080	699	putative oxidoreductase	- none -	620382	621080
fig|6666666.161614.peg.1264	CDS	gi_957788176_gb_LMYF01000004_1_Hypsibius_dujardini_scaffold4	621180	622952	1773	hypothetical protein	- none -	621180	622952
fig|6666666.161614.peg.1265	CDS	gi_957788176_gb_LMYF01000004_1_Hypsibius_dujardini_scaffold4	623660	622953	708	two component transcriptional regulator, winged helix family	- none -	622953	623660
fig|6666666.161614.peg.1266	CDS	gi_957788176_gb_LMYF01000004_1_Hypsibius_dujardini_scaffold4	624646	623657	990	Two-component sensor histidine kinase	- none -	623657	624646
fig|6666666.161614.peg.1267	CDS	gi_957788176_gb_LMYF01000004_1_Hypsibius_dujardini_scaffold4	625030	624653	378	GldH	- none -	624653	625030
fig|6666666.161614.peg.1268	CDS	gi_957788176_gb_LMYF01000004_1_Hypsibius_dujardini_scaffold4	626082	625207	876	Protein YicC	CBSS-323097.3.peg.2594	625207	626082
fig|6666666.161614.peg.1269	CDS	gi_957788176_gb_LMYF01000004_1_Hypsibius_dujardini_scaffold4	626416	626550	135	hypothetical protein	- none -	626416	626550
fig|6666666.161614.peg.1270	CDS	gi_957788176_gb_LMYF01000004_1_Hypsibius_dujardini_scaffold4	626720	627667	948	UDP-3-O-[3-hydroxymyristoyl] glucosamine N-acyltransferase (EC 2.3.1.-)	KDO2-Lipid A biosynthesis	626720	627667
fig|6666666.161614.peg.1271	CDS	gi_957788176_gb_LMYF01000004_1_Hypsibius_dujardini_scaffold4	628828	627668	1161	hypothetical protein	- none -	627668	628828
fig|6666666.161614.peg.1272	CDS	gi_957788176_gb_LMYF01000004_1_Hypsibius_dujardini_scaffold4	629922	628867	1056	Dihydroflavonol-4-reductase (EC 1.1.1.219)	- none -	628867	629922
fig|6666666.161614.peg.1273	CDS	gi_957788176_gb_LMYF01000004_1_Hypsibius_dujardini_scaffold4	630814	629969	846	3-hydroxyacyl-CoA dehydrogenase PaaC (EC 1.1.1.-)	- none -	629969	630814
fig|6666666.161614.peg.1274	CDS	gi_957788176_gb_LMYF01000004_1_Hypsibius_dujardini_scaffold4	630890	631780	891	hypothetical protein	- none -	630890	631780
fig|6666666.161614.peg.1275	CDS	gi_957788176_gb_LMYF01000004_1_Hypsibius_dujardini_scaffold4	631886	632389	504	hypothetical protein	- none -	631886	632389
fig|6666666.161614.peg.1276	CDS	gi_957788176_gb_LMYF01000004_1_Hypsibius_dujardini_scaffold4	633483	632452	1032	Phenylalanyl-tRNA synthetase alpha chain (EC 6.1.1.20)	tRNA aminoacylation, Phe	632452	633483
fig|6666666.161614.peg.1277	CDS	gi_957788176_gb_LMYF01000004_1_Hypsibius_dujardini_scaffold4	633604	633732	129	hypothetical protein	- none -	633604	633732
fig|6666666.161614.peg.1278	CDS	gi_957788176_gb_LMYF01000004_1_Hypsibius_dujardini_scaffold4	633822	633998	177	hypothetical protein	- none -	633822	633998
fig|6666666.161614.peg.1279	CDS	gi_957788176_gb_LMYF01000004_1_Hypsibius_dujardini_scaffold4	634074	635210	1137	hypothetical protein	- none -	634074	635210
fig|6666666.161614.peg.1280	CDS	gi_957788176_gb_LMYF01000004_1_Hypsibius_dujardini_scaffold4	635405	636451	1047	Oxidoreductase (EC 1.1.1.-)	- none -	635405	636451
fig|6666666.161614.peg.1281	CDS	gi_957788176_gb_LMYF01000004_1_Hypsibius_dujardini_scaffold4	636462	637931	1470	D-alanyl-D-alanine carboxypeptidase (EC 3.4.16.4)	CBSS-84588.1.peg.1247, Metallocarboxypeptidases (EC 3.4.17.-), Murein Hydrolases, Peptidoglycan Biosynthesis	636462	637931
fig|6666666.161614.peg.1282	CDS	gi_957788176_gb_LMYF01000004_1_Hypsibius_dujardini_scaffold4	638152	639828	1677	RTX toxins and related Ca2+-binding proteins	- none -	638152	639828
fig|6666666.161614.peg.1283	CDS	gi_957788176_gb_LMYF01000004_1_Hypsibius_dujardini_scaffold4	639986	640441	456	RNA polymerase ECF-type sigma factor	- none -	639986	640441
fig|6666666.161614.peg.1284	CDS	gi_957788176_gb_LMYF01000004_1_Hypsibius_dujardini_scaffold4	640438	641895	1458	hypothetical protein	- none -	640438	641895
fig|6666666.161614.peg.1285	CDS	gi_957788176_gb_LMYF01000004_1_Hypsibius_dujardini_scaffold4	643851	641989	1863	DNA mismatch repair protein MutL	DNA repair, bacterial MutL-MutS system	641989	643851
fig|6666666.161614.peg.1286	CDS	gi_957788176_gb_LMYF01000004_1_Hypsibius_dujardini_scaffold4	643946	646858	2913	Beta-hexosaminidase (EC 3.2.1.52)	Chitin and N-acetylglucosamine utilization	643946	646858
fig|6666666.161614.peg.1287	CDS	gi_957788176_gb_LMYF01000004_1_Hypsibius_dujardini_scaffold4	646918	648231	1314	hypothetical protein	- none -	646918	648231
fig|6666666.161614.peg.1288	CDS	gi_957788176_gb_LMYF01000004_1_Hypsibius_dujardini_scaffold4	649609	648368	1242	Signal peptidase-like protein	Heat shock dnaK gene cluster extended	648368	649609
fig|6666666.161614.peg.1289	CDS	gi_957788176_gb_LMYF01000004_1_Hypsibius_dujardini_scaffold4	651196	649991	1206	DNA polymerase III delta prime subunit (EC 2.7.7.7)	- none -	649991	651196
fig|6666666.161614.peg.1290	CDS	gi_957788176_gb_LMYF01000004_1_Hypsibius_dujardini_scaffold4	651131	651280	150	hypothetical protein	- none -	651131	651280
fig|6666666.161614.peg.1291	CDS	gi_957788176_gb_LMYF01000004_1_Hypsibius_dujardini_scaffold4	651795	651277	519	Glutathione peroxidase (EC 1.11.1.9)	Glutathione: Redox cycle	651277	651795
fig|6666666.161614.peg.1292	CDS	gi_957788176_gb_LMYF01000004_1_Hypsibius_dujardini_scaffold4	653267	651882	1386	hypothetical protein	- none -	651882	653267
fig|6666666.161614.peg.1293	CDS	gi_957788176_gb_LMYF01000004_1_Hypsibius_dujardini_scaffold4	653996	653298	699	Competence protein F homolog, phosphoribosyltransferase domain; protein YhgH required for utilization of DNA as sole source of carbon and energy	Biotin biosynthesis Experimental, Biotin synthesis cluster, CBSS-216591.1.peg.168	653298	653996
fig|6666666.161614.peg.1294	CDS	gi_957788176_gb_LMYF01000004_1_Hypsibius_dujardini_scaffold4	655420	654032	1389	DNA repair protein RadA	DNA repair, bacterial, Proteolysis in bacteria, ATP-dependent	654032	655420
fig|6666666.161614.peg.1295	CDS	gi_957788176_gb_LMYF01000004_1_Hypsibius_dujardini_scaffold4	655911	656588	678	hypothetical protein	- none -	655911	656588
fig|6666666.161614.peg.1296	CDS	gi_957788176_gb_LMYF01000004_1_Hypsibius_dujardini_scaffold4	656696	659743	3048	TonB-dependent receptor	Ton and Tol transport systems	656696	659743
fig|6666666.161614.peg.1297	CDS	gi_957788176_gb_LMYF01000004_1_Hypsibius_dujardini_scaffold4	659764	661110	1347	SusD, outer membrane protein	Cellulosome	659764	661110
fig|6666666.161614.peg.1298	CDS	gi_957788176_gb_LMYF01000004_1_Hypsibius_dujardini_scaffold4	662742	661186	1557	Cytoplasmic axial filament protein CafA and Ribonuclease G (EC 3.1.4.-)	Bacterial Cell Division, CBSS-354.1.peg.2917, RNA processing and degradation, bacterial	661186	662742
fig|6666666.161614.peg.1299	CDS	gi_957788176_gb_LMYF01000004_1_Hypsibius_dujardini_scaffold4	663952	663077	876	conserved hypothetical protein, with TPR repeat	- none -	663077	663952
fig|6666666.161614.peg.1300	CDS	gi_957788176_gb_LMYF01000004_1_Hypsibius_dujardini_scaffold4	664360	664040	321	Integration host factor alpha/beta	DNA structural proteins, bacterial	664040	664360
fig|6666666.161614.peg.1301	CDS	gi_957788176_gb_LMYF01000004_1_Hypsibius_dujardini_scaffold4	664503	665600	1098	A/G-specific adenine glycosylase (EC 3.2.2.-)	DNA repair, bacterial	664503	665600
fig|6666666.161614.peg.1302	CDS	gi_957788176_gb_LMYF01000004_1_Hypsibius_dujardini_scaffold4	665733	666143	411	Single-stranded DNA-binding protein	DNA repair, bacterial, DNA repair, bacterial RecFOR pathway	665733	666143
fig|6666666.161614.peg.1303	CDS	gi_957788176_gb_LMYF01000004_1_Hypsibius_dujardini_scaffold4	666241	667584	1344	Hemolysins and related proteins containing CBS domains	- none -	666241	667584
fig|6666666.161614.peg.1304	CDS	gi_957788176_gb_LMYF01000004_1_Hypsibius_dujardini_scaffold4	667599	668198	600	GldD	- none -	667599	668198
fig|6666666.161614.peg.1305	CDS	gi_957788176_gb_LMYF01000004_1_Hypsibius_dujardini_scaffold4	668275	670080	1806	FOG: TPR repeat	- none -	668275	670080
fig|6666666.161614.peg.1306	CDS	gi_957788176_gb_LMYF01000004_1_Hypsibius_dujardini_scaffold4	670115	670717	603	hypothetical protein	- none -	670115	670717
fig|6666666.161614.peg.1307	CDS	gi_957788176_gb_LMYF01000004_1_Hypsibius_dujardini_scaffold4	670746	672125	1380	Predicted L-lactate dehydrogenase, Iron-sulfur cluster-binding subunit YkgF	Lactate utilization	670746	672125
fig|6666666.161614.peg.1308	CDS	gi_957788176_gb_LMYF01000004_1_Hypsibius_dujardini_scaffold4	672131	672841	711	hypothetical protein	- none -	672131	672841
fig|6666666.161614.peg.1309	CDS	gi_957788176_gb_LMYF01000004_1_Hypsibius_dujardini_scaffold4	672844	674145	1302	Conserved protein	- none -	672844	674145
fig|6666666.161614.peg.1310	CDS	gi_957788176_gb_LMYF01000004_1_Hypsibius_dujardini_scaffold4	675158	674142	1017	Permease of the drug/metabolite transporter (DMT) superfamily	Queuosine-Archaeosine Biosynthesis	674142	675158
fig|6666666.161614.peg.1311	CDS	gi_957788176_gb_LMYF01000004_1_Hypsibius_dujardini_scaffold4	676663	675158	1506	IMP cyclohydrolase (EC 3.5.4.10) / Phosphoribosylaminoimidazolecarboxamide formyltransferase (EC 2.1.2.3)	5-FCL-like protein, De Novo Purine Biosynthesis, De Novo Purine Biosynthesis	675158	676663
fig|6666666.161614.peg.1312	CDS	gi_957788176_gb_LMYF01000004_1_Hypsibius_dujardini_scaffold4	678808	676715	2094	Late competence protein ComEC, DNA transport	- none -	676715	678808
fig|6666666.161614.peg.1313	CDS	gi_957788176_gb_LMYF01000004_1_Hypsibius_dujardini_scaffold4	679331	678846	486	hypothetical protein	- none -	678846	679331
fig|6666666.161614.peg.1314	CDS	gi_957788176_gb_LMYF01000004_1_Hypsibius_dujardini_scaffold4	679653	680126	474	hypothetical protein	- none -	679653	680126
fig|6666666.161614.peg.1315	CDS	gi_957788176_gb_LMYF01000004_1_Hypsibius_dujardini_scaffold4	680205	680861	657	hypothetical protein	- none -	680205	680861
fig|6666666.161614.peg.1316	CDS	gi_957788176_gb_LMYF01000004_1_Hypsibius_dujardini_scaffold4	680903	681625	723	sensor histidine kinase	- none -	680903	681625
fig|6666666.161614.peg.1317	CDS	gi_957788176_gb_LMYF01000004_1_Hypsibius_dujardini_scaffold4	681629	682288	660	Two-component response regulator	- none -	681629	682288
fig|6666666.161614.peg.1318	CDS	gi_957788176_gb_LMYF01000004_1_Hypsibius_dujardini_scaffold4	685171	682346	2826	Carbamoyl-phosphate synthase large chain (EC 6.3.5.5)	De Novo Pyrimidine Synthesis	682346	685171
fig|6666666.161614.peg.1319	CDS	gi_957788176_gb_LMYF01000004_1_Hypsibius_dujardini_scaffold4	685868	685281	588	hypothetical protein	- none -	685281	685868
fig|6666666.161614.peg.1320	CDS	gi_957788176_gb_LMYF01000004_1_Hypsibius_dujardini_scaffold4	686669	685962	708	hypothetical protein	- none -	685962	686669
fig|6666666.161614.peg.1321	CDS	gi_957788176_gb_LMYF01000004_1_Hypsibius_dujardini_scaffold4	686750	688579	1830	hypothetical protein	- none -	686750	688579
fig|6666666.161614.peg.1322	CDS	gi_957788176_gb_LMYF01000004_1_Hypsibius_dujardini_scaffold4	688602	689063	462	Thiol peroxidase, Bcp-type (EC 1.11.1.15)	Thioredoxin-disulfide reductase	688602	689063
fig|6666666.161614.peg.1323	CDS	gi_957788176_gb_LMYF01000004_1_Hypsibius_dujardini_scaffold4	689202	690002	801	hypothetical protein	- none -	689202	690002
fig|6666666.161614.peg.1324	CDS	gi_957788176_gb_LMYF01000004_1_Hypsibius_dujardini_scaffold4	690143	690901	759	hypothetical protein	- none -	690143	690901
fig|6666666.161614.peg.1325	CDS	gi_957788176_gb_LMYF01000004_1_Hypsibius_dujardini_scaffold4	691008	694103	3096	hypothetical protein	- none -	691008	694103
fig|6666666.161614.peg.1326	CDS	gi_957788176_gb_LMYF01000004_1_Hypsibius_dujardini_scaffold4	694171	694818	648	hypothetical protein	- none -	694171	694818
fig|6666666.161614.peg.1327	CDS	gi_957788176_gb_LMYF01000004_1_Hypsibius_dujardini_scaffold4	694978	695895	918	methyl-accepting chemotaxis protein	- none -	694978	695895
fig|6666666.161614.peg.1328	CDS	gi_957788176_gb_LMYF01000004_1_Hypsibius_dujardini_scaffold4	695935	696741	807	Uncharacterized isomerase yddE, PhzC-PhzF family	- none -	695935	696741
fig|6666666.161614.peg.1329	CDS	gi_957788176_gb_LMYF01000004_1_Hypsibius_dujardini_scaffold4	696936	698216	1281	hypothetical protein	- none -	696936	698216
fig|6666666.161614.peg.1330	CDS	gi_957788176_gb_LMYF01000004_1_Hypsibius_dujardini_scaffold4	698415	699359	945	Hydrolase, alpha/beta fold family	- none -	698415	699359
fig|6666666.161614.peg.1331	CDS	gi_957788176_gb_LMYF01000004_1_Hypsibius_dujardini_scaffold4	699412	699525	114	hypothetical protein	- none -	699412	699525
fig|6666666.161614.peg.1332	CDS	gi_957788176_gb_LMYF01000004_1_Hypsibius_dujardini_scaffold4	699543	700292	750	Sterol desaturase	- none -	699543	700292
fig|6666666.161614.peg.1333	CDS	gi_957788176_gb_LMYF01000004_1_Hypsibius_dujardini_scaffold4	700388	701329	942	hypothetical protein	- none -	700388	701329
fig|6666666.161614.peg.1334	CDS	gi_957788176_gb_LMYF01000004_1_Hypsibius_dujardini_scaffold4	702196	701378	819	Biotin-protein ligase (EC 6.3.4.15)	Biotin biosynthesis, Biotin synthesis cluster	701378	702196
fig|6666666.161614.peg.1335	CDS	gi_957788176_gb_LMYF01000004_1_Hypsibius_dujardini_scaffold4	702343	702747	405	Iojap protein	- none -	702343	702747
fig|6666666.161614.peg.1336	CDS	gi_957788176_gb_LMYF01000004_1_Hypsibius_dujardini_scaffold4	702925	704889	1965	Cell division protein FtsH (EC 3.4.24.-)	Bacterial Cell Division, Cell division-ribosomal stress proteins cluster, Folate biosynthesis cluster	702925	704889
fig|6666666.161614.peg.1337	CDS	gi_957788176_gb_LMYF01000004_1_Hypsibius_dujardini_scaffold4	704897	705532	636	Predicted L-lactate dehydrogenase, hypothetical protein subunit YkgG	Lactate utilization	704897	705532
fig|6666666.161614.peg.1338	CDS	gi_957788176_gb_LMYF01000004_1_Hypsibius_dujardini_scaffold4	705563	705988	426	hypothetical protein	- none -	705563	705988
fig|6666666.161614.peg.1339	CDS	gi_957788176_gb_LMYF01000004_1_Hypsibius_dujardini_scaffold4	705997	706779	783	UDP-2,3-diacylglucosamine hydrolase (EC 3.6.1.-)	- none -	705997	706779
fig|6666666.161614.peg.1340	CDS	gi_957788176_gb_LMYF01000004_1_Hypsibius_dujardini_scaffold4	706776	707588	813	hypothetical protein	- none -	706776	707588
fig|6666666.161614.peg.1341	CDS	gi_957788176_gb_LMYF01000004_1_Hypsibius_dujardini_scaffold4	707666	708760	1095	hypothetical protein	- none -	707666	708760
fig|6666666.161614.peg.1342	CDS	gi_957788176_gb_LMYF01000004_1_Hypsibius_dujardini_scaffold4	709290	708763	528	hypothetical protein	- none -	708763	709290
fig|6666666.161614.peg.1343	CDS	gi_957788176_gb_LMYF01000004_1_Hypsibius_dujardini_scaffold4	710038	709463	576	hypothetical protein	- none -	709463	710038
fig|6666666.161614.peg.1344	CDS	gi_957788176_gb_LMYF01000004_1_Hypsibius_dujardini_scaffold4	711095	710124	972	Peptidase, family M23 (EC 3.4.24.-)	CBSS-226186.1.peg.3994	710124	711095
fig|6666666.161614.peg.1345	CDS	gi_957788176_gb_LMYF01000004_1_Hypsibius_dujardini_scaffold4	711375	713873	2499	Alanyl-tRNA synthetase (EC 6.1.1.7)	CBSS-226186.1.peg.3994, Cluster containing Alanyl-tRNA synthetase, tRNA aminoacylation, Ala	711375	713873
fig|6666666.161614.peg.1346	CDS	gi_957788176_gb_LMYF01000004_1_Hypsibius_dujardini_scaffold4	714017	713877	141	hypothetical protein	- none -	713877	714017
fig|6666666.161614.peg.1347	CDS	gi_957788176_gb_LMYF01000004_1_Hypsibius_dujardini_scaffold4	714146	714027	120	hypothetical protein	- none -	714027	714146
fig|6666666.161614.peg.1348	CDS	gi_957788176_gb_LMYF01000004_1_Hypsibius_dujardini_scaffold4	714150	714665	516	Acetyltransferase, GNAT family	- none -	714150	714665
fig|6666666.161614.peg.1349	CDS	gi_957788176_gb_LMYF01000004_1_Hypsibius_dujardini_scaffold4	714784	715803	1020	hypothetical protein	- none -	714784	715803
fig|6666666.161614.peg.1350	CDS	gi_957788176_gb_LMYF01000004_1_Hypsibius_dujardini_scaffold4	715909	717357	1449	Aspartyl-tRNA(Asn) amidotransferase subunit B (EC 6.3.5.6) @ Glutamyl-tRNA(Gln) amidotransferase subunit B (EC 6.3.5.7)	tRNA aminoacylation, Asp and Asn, tRNA aminoacylation, Glu and Gln	715909	717357
fig|6666666.161614.peg.1351	CDS	gi_957788176_gb_LMYF01000004_1_Hypsibius_dujardini_scaffold4	717359	718552	1194	thioredoxin family protein	- none -	717359	718552
fig|6666666.161614.peg.1352	CDS	gi_957788176_gb_LMYF01000004_1_Hypsibius_dujardini_scaffold4	719995	719273	723	hypothetical protein	- none -	719273	719995
fig|6666666.161614.peg.1353	CDS	gi_957788176_gb_LMYF01000004_1_Hypsibius_dujardini_scaffold4	721379	720096	1284	hypothetical protein	- none -	720096	721379
fig|6666666.161614.peg.1354	CDS	gi_957788176_gb_LMYF01000004_1_Hypsibius_dujardini_scaffold4	724722	721567	3156	TonB-dependent receptor	Ton and Tol transport systems	721567	724722
fig|6666666.161614.peg.1355	CDS	gi_957788176_gb_LMYF01000004_1_Hypsibius_dujardini_scaffold4	727228	724904	2325	Probable integral membrane protein	- none -	724904	727228
fig|6666666.161614.peg.1356	CDS	gi_957788176_gb_LMYF01000004_1_Hypsibius_dujardini_scaffold4	727337	729628	2292	hypothetical protein	- none -	727337	729628
fig|6666666.161614.peg.1357	CDS	gi_957788176_gb_LMYF01000004_1_Hypsibius_dujardini_scaffold4	729631	730377	747	DNA recombination and repair protein RecO	DNA repair, bacterial RecFOR pathway, Glycyl-tRNA synthetase containing cluster	729631	730377
fig|6666666.161614.peg.1358	CDS	gi_957788176_gb_LMYF01000004_1_Hypsibius_dujardini_scaffold4	731087	730374	714	predicted protein	- none -	730374	731087
fig|6666666.161614.peg.1359	CDS	gi_957788176_gb_LMYF01000004_1_Hypsibius_dujardini_scaffold4	732297	731119	1179	Chlorohydrolase, Atz/Trz family	- none -	731119	732297
fig|6666666.161614.peg.1360	CDS	gi_957788176_gb_LMYF01000004_1_Hypsibius_dujardini_scaffold4	732445	733509	1065	Peptide chain release factor 1	Translation termination factors bacterial	732445	733509
fig|6666666.161614.peg.1361	CDS	gi_957788176_gb_LMYF01000004_1_Hypsibius_dujardini_scaffold4	733578	734135	558	hypothetical protein	- none -	733578	734135
fig|6666666.161614.peg.1362	CDS	gi_957788176_gb_LMYF01000004_1_Hypsibius_dujardini_scaffold4	734264	734121	144	hypothetical protein	- none -	734121	734264
fig|6666666.161614.peg.1363	CDS	gi_957788176_gb_LMYF01000004_1_Hypsibius_dujardini_scaffold4	734689	734528	162	hypothetical protein	- none -	734528	734689
fig|6666666.161614.peg.1364	CDS	gi_957788176_gb_LMYF01000004_1_Hypsibius_dujardini_scaffold4	734769	734930	162	hypothetical protein	- none -	734769	734930
fig|6666666.161614.peg.1365	CDS	gi_957788176_gb_LMYF01000004_1_Hypsibius_dujardini_scaffold4	735794	735075	720	FIG111991: hypothetical protein	CBSS-313593.3.peg.2729	735075	735794
fig|6666666.161614.peg.1366	CDS	gi_957788176_gb_LMYF01000004_1_Hypsibius_dujardini_scaffold4	736383	735841	543	RNA polymerase sigma-70 factor	CBSS-313593.3.peg.2729, Transcription initiation, bacterial sigma factors	735841	736383
fig|6666666.161614.peg.1367	CDS	gi_957788176_gb_LMYF01000004_1_Hypsibius_dujardini_scaffold4	736838	736461	378	Glycine cleavage system H protein	Glycine and Serine Utilization, Glycine cleavage system	736461	736838
fig|6666666.161614.peg.1368	CDS	gi_957788176_gb_LMYF01000004_1_Hypsibius_dujardini_scaffold4	737031	739496	2466	TonB-dependent receptor	Ton and Tol transport systems	737031	739496
fig|6666666.161614.peg.1369	CDS	gi_957788176_gb_LMYF01000004_1_Hypsibius_dujardini_scaffold4	740261	739554	708	Peptidyl-prolyl cis-trans isomerase (EC 5.2.1.8)	Queuosine-Archaeosine Biosynthesis	739554	740261
fig|6666666.161614.peg.1370	CDS	gi_957788176_gb_LMYF01000004_1_Hypsibius_dujardini_scaffold4	740607	740263	345	hypothetical protein	- none -	740263	740607
fig|6666666.161614.peg.1371	CDS	gi_957788176_gb_LMYF01000004_1_Hypsibius_dujardini_scaffold4	740676	742013	1338	Seryl-tRNA synthetase (EC 6.1.1.11)	Glycine and Serine Utilization, tRNA aminoacylation, Ser	740676	742013
fig|6666666.161614.peg.1372	CDS	gi_957788176_gb_LMYF01000004_1_Hypsibius_dujardini_scaffold4	743059	742085	975	Gll1663 protein	- none -	742085	743059
fig|6666666.161614.peg.1373	CDS	gi_957788176_gb_LMYF01000004_1_Hypsibius_dujardini_scaffold4	743224	743541	318	hypothetical protein	- none -	743224	743541
fig|6666666.161614.peg.1374	CDS	gi_957788176_gb_LMYF01000004_1_Hypsibius_dujardini_scaffold4	744589	743534	1056	Alkane-1 monooxygenase (EC 1.14.15.3)	- none -	743534	744589
fig|6666666.161614.peg.1375	CDS	gi_957788176_gb_LMYF01000004_1_Hypsibius_dujardini_scaffold4	744714	746198	1485	conserved hypothetical protein	- none -	744714	746198
fig|6666666.161614.peg.1376	CDS	gi_957788176_gb_LMYF01000004_1_Hypsibius_dujardini_scaffold4	746345	747544	1200	protein of unknown function DUF1501	- none -	746345	747544
fig|6666666.161614.peg.1377	CDS	gi_957788176_gb_LMYF01000004_1_Hypsibius_dujardini_scaffold4	749676	747619	2058	Oligopeptide transporter	- none -	747619	749676
fig|6666666.161614.peg.1378	CDS	gi_957788176_gb_LMYF01000004_1_Hypsibius_dujardini_scaffold4	751392	749761	1632	Di-/tripeptide transporter	Proton-dependent Peptide Transporters	749761	751392
fig|6666666.161614.peg.1379	CDS	gi_957788176_gb_LMYF01000004_1_Hypsibius_dujardini_scaffold4	753167	751494	1674	Di-/tripeptide transporter	Proton-dependent Peptide Transporters	751494	753167
fig|6666666.161614.peg.1380	CDS	gi_957788176_gb_LMYF01000004_1_Hypsibius_dujardini_scaffold4	753317	754609	1293	Phosphoribosylamine--glycine ligase (EC 6.3.4.13)	De Novo Purine Biosynthesis	753317	754609
fig|6666666.161614.peg.1381	CDS	gi_957788176_gb_LMYF01000004_1_Hypsibius_dujardini_scaffold4	754644	755645	1002	Tryptophan 2,3-dioxygenase (EC 1.13.11.11)	Aromatic amino acid degradation, NAD and NADP cofactor biosynthesis global	754644	755645
fig|6666666.161614.peg.1382	CDS	gi_957788176_gb_LMYF01000004_1_Hypsibius_dujardini_scaffold4	756470	755652	819	hydrolase, alpha/beta fold family	- none -	755652	756470
fig|6666666.161614.peg.1383	CDS	gi_957788176_gb_LMYF01000004_1_Hypsibius_dujardini_scaffold4	757097	756630	468	FIG00906873: hypothetical protein	- none -	756630	757097
fig|6666666.161614.peg.1384	CDS	gi_957788176_gb_LMYF01000004_1_Hypsibius_dujardini_scaffold4	758403	757204	1200	hypothetical protein	- none -	757204	758403
fig|6666666.161614.peg.1385	CDS	gi_957788176_gb_LMYF01000004_1_Hypsibius_dujardini_scaffold4	758466	758621	156	hypothetical protein	- none -	758466	758621
fig|6666666.161614.peg.1386	CDS	gi_957788176_gb_LMYF01000004_1_Hypsibius_dujardini_scaffold4	758670	759695	1026	Rod shape-determining protein MreB	Bacterial Cell Division, Bacterial Cytoskeleton, Bacterial cell division cluster	758670	759695
fig|6666666.161614.peg.1387	CDS	gi_957788176_gb_LMYF01000004_1_Hypsibius_dujardini_scaffold4	759781	760656	876	Rod shape-determining protein MreC	Bacterial Cell Division, Bacterial Cytoskeleton, Bacterial cell division cluster, CBSS-354.1.peg.2917	759781	760656
fig|6666666.161614.peg.1388	CDS	gi_957788176_gb_LMYF01000004_1_Hypsibius_dujardini_scaffold4	760653	761183	531	Rod shape-determining protein MreD	Bacterial Cell Division, Bacterial Cytoskeleton, Bacterial cell division cluster, CBSS-354.1.peg.2917	760653	761183
fig|6666666.161614.peg.1389	CDS	gi_957788176_gb_LMYF01000004_1_Hypsibius_dujardini_scaffold4	761360	763459	2100	Penicillin-binding protein 2 (PBP-2)	16S rRNA modification within P site of ribosome, Bacterial cell division cluster, Peptidoglycan Biosynthesis	761360	763459
fig|6666666.161614.peg.1390	CDS	gi_957788176_gb_LMYF01000004_1_Hypsibius_dujardini_scaffold4	763456	764793	1338	Rod shape-determining protein RodA	Bacterial Cytoskeleton, Bacterial cell division cluster, Peptidoglycan Biosynthesis	763456	764793
fig|6666666.161614.peg.1391	CDS	gi_957788176_gb_LMYF01000004_1_Hypsibius_dujardini_scaffold4	764859	765599	741	hypothetical protein	- none -	764859	765599
fig|6666666.161614.peg.1392	CDS	gi_957788176_gb_LMYF01000004_1_Hypsibius_dujardini_scaffold4	766135	765707	429	hypothetical protein	- none -	765707	766135
fig|6666666.161614.peg.1393	CDS	gi_957788176_gb_LMYF01000004_1_Hypsibius_dujardini_scaffold4	767002	766139	864	hypothetical protein	- none -	766139	767002
fig|6666666.161614.peg.1394	CDS	gi_957788176_gb_LMYF01000004_1_Hypsibius_dujardini_scaffold4	767624	767070	555	RNA polymerase ECF-type sigma factor	- none -	767070	767624
fig|6666666.161614.peg.1395	CDS	gi_957788176_gb_LMYF01000004_1_Hypsibius_dujardini_scaffold4	768711	767755	957	Transketolase, C-terminal section (EC 2.2.1.1)	Pentose phosphate pathway	767755	768711
fig|6666666.161614.peg.1396	CDS	gi_957788176_gb_LMYF01000004_1_Hypsibius_dujardini_scaffold4	769917	768865	1053	UDP-glucose 4-epimerase (EC 5.1.3.2)	CBSS-296591.1.peg.2330, Lactose and Galactose Uptake and Utilization, N-linked Glycosylation in Bacteria, Rhamnose containing glycans	768865	769917
fig|6666666.161614.peg.1397	CDS	gi_957788176_gb_LMYF01000004_1_Hypsibius_dujardini_scaffold4	771202	769973	1230	Probable low-affinity inorganic phosphate transporter	Phosphate metabolism	769973	771202
fig|6666666.161614.peg.1398	CDS	gi_957788176_gb_LMYF01000004_1_Hypsibius_dujardini_scaffold4	771916	771275	642	Phosphate transport regulator (distant homolog of PhoU)	Phosphate metabolism	771275	771916
fig|6666666.161614.peg.1399	CDS	gi_957788176_gb_LMYF01000004_1_Hypsibius_dujardini_scaffold4	772100	773407	1308	hypothetical protein	- none -	772100	773407
fig|6666666.161614.peg.1400	CDS	gi_957788176_gb_LMYF01000004_1_Hypsibius_dujardini_scaffold4	773510	776296	2787	TonB-dependent receptor	Ton and Tol transport systems	773510	776296
fig|6666666.161614.peg.1401	CDS	gi_957788176_gb_LMYF01000004_1_Hypsibius_dujardini_scaffold4	776329	777792	1464	hypothetical protein	- none -	776329	777792
fig|6666666.161614.peg.1402	CDS	gi_957788176_gb_LMYF01000004_1_Hypsibius_dujardini_scaffold4	779082	778054	1029	Glycosyltransferase (EC 2.4.1.-)	- none -	778054	779082
fig|6666666.161614.peg.1403	CDS	gi_957788176_gb_LMYF01000004_1_Hypsibius_dujardini_scaffold4	779930	779094	837	Ser/Thr protein phosphatase family protein, UDP-2,3-diacylglucosamine hydrolase (EC 3.6.1.-) homolog	- none -	779094	779930
fig|6666666.161614.peg.1404	CDS	gi_957788176_gb_LMYF01000004_1_Hypsibius_dujardini_scaffold4	780224	783517	3294	TonB-dependent receptor	Ton and Tol transport systems	780224	783517
fig|6666666.161614.peg.1405	CDS	gi_957788176_gb_LMYF01000004_1_Hypsibius_dujardini_scaffold4	783546	785072	1527	hypothetical protein	- none -	783546	785072
fig|6666666.161614.peg.1406	CDS	gi_957788176_gb_LMYF01000004_1_Hypsibius_dujardini_scaffold4	785174	786499	1326	Related to competence proteins	- none -	785174	786499
fig|6666666.161614.peg.1407	CDS	gi_957788176_gb_LMYF01000004_1_Hypsibius_dujardini_scaffold4	786506	787591	1086	hypothetical protein	- none -	786506	787591
fig|6666666.161614.peg.1408	CDS	gi_957788176_gb_LMYF01000004_1_Hypsibius_dujardini_scaffold4	787599	788189	591	FIG00954147: hypothetical protein	- none -	787599	788189
fig|6666666.161614.peg.1409	CDS	gi_957788176_gb_LMYF01000004_1_Hypsibius_dujardini_scaffold4	788255	788929	675	Phosphonoacetaldehyde hydrolase (EC 3.11.1.1)	- none -	788255	788929
fig|6666666.161614.peg.1410	CDS	gi_957788176_gb_LMYF01000004_1_Hypsibius_dujardini_scaffold4	788929	790227	1299	hypothetical protein	- none -	788929	790227
fig|6666666.161614.peg.1411	CDS	gi_957788176_gb_LMYF01000004_1_Hypsibius_dujardini_scaffold4	790220	791341	1122	putative secreted oxidoreductase	- none -	790220	791341
fig|6666666.161614.peg.1412	CDS	gi_957788176_gb_LMYF01000004_1_Hypsibius_dujardini_scaffold4	793043	791994	1050	Phosphate regulon sensor protein PhoR (SphS) (EC 2.7.13.3)	Phosphate metabolism	791994	793043
fig|6666666.161614.peg.1413	CDS	gi_957788176_gb_LMYF01000004_1_Hypsibius_dujardini_scaffold4	793789	793112	678	Phosphate regulon transcriptional regulatory protein phoB	- none -	793112	793789
fig|6666666.161614.peg.1414	CDS	gi_957788176_gb_LMYF01000004_1_Hypsibius_dujardini_scaffold4	793981	793862	120	hypothetical protein	- none -	793862	793981
fig|6666666.161614.peg.1415	CDS	gi_957788176_gb_LMYF01000004_1_Hypsibius_dujardini_scaffold4	794018	796249	2232	hypothetical protein	- none -	794018	796249
fig|6666666.161614.peg.1416	CDS	gi_957788176_gb_LMYF01000004_1_Hypsibius_dujardini_scaffold4	796309	798087	1779	hypothetical protein	- none -	796309	798087
fig|6666666.161614.peg.1417	CDS	gi_957788176_gb_LMYF01000004_1_Hypsibius_dujardini_scaffold4	798474	798157	318	hypothetical protein	- none -	798157	798474
fig|6666666.161614.peg.1418	CDS	gi_957788176_gb_LMYF01000004_1_Hypsibius_dujardini_scaffold4	798612	799748	1137	ATP synthase A chain (EC 3.6.3.14)	- none -	798612	799748
fig|6666666.161614.peg.1419	CDS	gi_957788176_gb_LMYF01000004_1_Hypsibius_dujardini_scaffold4	799781	800017	237	ATP synthase C chain (EC 3.6.3.14)	- none -	799781	800017
fig|6666666.161614.peg.1420	CDS	gi_957788176_gb_LMYF01000004_1_Hypsibius_dujardini_scaffold4	800109	800603	495	ATP synthase B chain (EC 3.6.3.14)	- none -	800109	800603
fig|6666666.161614.peg.1421	CDS	gi_957788176_gb_LMYF01000004_1_Hypsibius_dujardini_scaffold4	800617	801180	564	ATP synthase delta chain (EC 3.6.3.14)	- none -	800617	801180
fig|6666666.161614.peg.1422	CDS	gi_957788176_gb_LMYF01000004_1_Hypsibius_dujardini_scaffold4	801207	802787	1581	ATP synthase alpha chain (EC 3.6.3.14)	- none -	801207	802787
fig|6666666.161614.peg.1423	CDS	gi_957788176_gb_LMYF01000004_1_Hypsibius_dujardini_scaffold4	803273	804580	1308	hypothetical protein	- none -	803273	804580
fig|6666666.161614.peg.1424	CDS	gi_957788176_gb_LMYF01000004_1_Hypsibius_dujardini_scaffold4	804991	806280	1290	hypothetical protein	- none -	804991	806280
fig|6666666.161614.peg.1425	CDS	gi_957788176_gb_LMYF01000004_1_Hypsibius_dujardini_scaffold4	806430	808655	2226	hypothetical protein	- none -	806430	808655
fig|6666666.161614.peg.1426	CDS	gi_957788176_gb_LMYF01000004_1_Hypsibius_dujardini_scaffold4	808667	808954	288	hypothetical protein	- none -	808667	808954
fig|6666666.161614.peg.1427	CDS	gi_957788176_gb_LMYF01000004_1_Hypsibius_dujardini_scaffold4	808983	809630	648	hypothetical protein	- none -	808983	809630
fig|6666666.161614.peg.1428	CDS	gi_957788176_gb_LMYF01000004_1_Hypsibius_dujardini_scaffold4	809703	810290	588	membrane protein, putative	- none -	809703	810290
fig|6666666.161614.peg.1429	CDS	gi_957788176_gb_LMYF01000004_1_Hypsibius_dujardini_scaffold4	810298	810972	675	hypothetical protein	- none -	810298	810972
fig|6666666.161614.peg.1430	CDS	gi_957788176_gb_LMYF01000004_1_Hypsibius_dujardini_scaffold4	810965	811255	291	cAMP-binding proteins - catabolite gene activator and regulatory subunit of cAMP-dependent protein kinases	cAMP signaling in bacteria	810965	811255
fig|6666666.161614.peg.1431	CDS	gi_957788176_gb_LMYF01000004_1_Hypsibius_dujardini_scaffold4	811259	811744	486	hypothetical protein	- none -	811259	811744
fig|6666666.161614.peg.1432	CDS	gi_957788176_gb_LMYF01000004_1_Hypsibius_dujardini_scaffold4	811976	811845	132	hypothetical protein	- none -	811845	811976
fig|6666666.161614.peg.1433	CDS	gi_957788176_gb_LMYF01000004_1_Hypsibius_dujardini_scaffold4	812365	811985	381	hypothetical protein	- none -	811985	812365
fig|6666666.161614.peg.1434	CDS	gi_957788176_gb_LMYF01000004_1_Hypsibius_dujardini_scaffold4	812435	812566	132	hypothetical protein	- none -	812435	812566
fig|6666666.161614.peg.1435	CDS	gi_957788176_gb_LMYF01000004_1_Hypsibius_dujardini_scaffold4	812675	813610	936	ABC transporter, ATP-binding protein	- none -	812675	813610
fig|6666666.161614.peg.1436	CDS	gi_957788176_gb_LMYF01000004_1_Hypsibius_dujardini_scaffold4	813588	814478	891	putative integral membrane protein	- none -	813588	814478
fig|6666666.161614.peg.1437	CDS	gi_957788176_gb_LMYF01000004_1_Hypsibius_dujardini_scaffold4	814490	815215	726	hypothetical protein	- none -	814490	815215
fig|6666666.161614.peg.1438	CDS	gi_957788176_gb_LMYF01000004_1_Hypsibius_dujardini_scaffold4	816306	815221	1086	4-hydroxythreonine-4-phosphate dehydrogenase (EC 1.1.1.262)	ECSIG4-SIG7, Pyridoxin (Vitamin B6) Biosynthesis	815221	816306
fig|6666666.161614.peg.1439	CDS	gi_957788176_gb_LMYF01000004_1_Hypsibius_dujardini_scaffold4	816353	816469	117	hypothetical protein	- none -	816353	816469
fig|6666666.161614.peg.1440	CDS	gi_957788176_gb_LMYF01000004_1_Hypsibius_dujardini_scaffold4	816768	819419	2652	hypothetical protein	- none -	816768	819419
fig|6666666.161614.peg.1441	CDS	gi_957788176_gb_LMYF01000004_1_Hypsibius_dujardini_scaffold4	819465	823775	4311	hypothetical protein	- none -	819465	823775
fig|6666666.161614.peg.1442	CDS	gi_957788176_gb_LMYF01000004_1_Hypsibius_dujardini_scaffold4	824497	823793	705	Two-component system response regulator	- none -	823793	824497
fig|6666666.161614.peg.1443	CDS	gi_957788176_gb_LMYF01000004_1_Hypsibius_dujardini_scaffold4	825782	824490	1293	putative two-component system sensor protein, no kinase domain	- none -	824490	825782
fig|6666666.161614.peg.1444	CDS	gi_957788176_gb_LMYF01000004_1_Hypsibius_dujardini_scaffold4	826116	825760	357	hypothetical protein	- none -	825760	826116
fig|6666666.161614.peg.1445	CDS	gi_957788176_gb_LMYF01000004_1_Hypsibius_dujardini_scaffold4	827135	826116	1020	hypothetical protein	- none -	826116	827135
fig|6666666.161614.peg.1446	CDS	gi_957788176_gb_LMYF01000004_1_Hypsibius_dujardini_scaffold4	827301	828719	1419	hypothetical protein	- none -	827301	828719
fig|6666666.161614.peg.1447	CDS	gi_957788176_gb_LMYF01000004_1_Hypsibius_dujardini_scaffold4	828723	829982	1260	putative outer membrane protein	- none -	828723	829982
fig|6666666.161614.peg.1448	CDS	gi_957788176_gb_LMYF01000004_1_Hypsibius_dujardini_scaffold4	830000	830752	753	hypothetical protein	- none -	830000	830752
fig|6666666.161614.peg.1449	CDS	gi_957788176_gb_LMYF01000004_1_Hypsibius_dujardini_scaffold4	833147	830754	2394	hypothetical protein	- none -	830754	833147
fig|6666666.161614.peg.1450	CDS	gi_957788176_gb_LMYF01000004_1_Hypsibius_dujardini_scaffold4	833127	833354	228	hypothetical protein	- none -	833127	833354
fig|6666666.161614.peg.1451	CDS	gi_957788176_gb_LMYF01000004_1_Hypsibius_dujardini_scaffold4	834314	833394	921	hypothetical protein	- none -	833394	834314
fig|6666666.161614.peg.1452	CDS	gi_957788176_gb_LMYF01000004_1_Hypsibius_dujardini_scaffold4	836133	834526	1608	hypothetical protein	- none -	834526	836133
fig|6666666.161614.peg.1453	CDS	gi_957788176_gb_LMYF01000004_1_Hypsibius_dujardini_scaffold4	837796	836180	1617	hypothetical protein	- none -	836180	837796
fig|6666666.161614.peg.1454	CDS	gi_957788176_gb_LMYF01000004_1_Hypsibius_dujardini_scaffold4	839749	837824	1926	CHU large protein; uncharacterized	- none -	837824	839749
fig|6666666.161614.peg.1455	CDS	gi_957788176_gb_LMYF01000004_1_Hypsibius_dujardini_scaffold4	840558	839887	672	Endonuclease III (EC 4.2.99.18)	DNA Repair Base Excision	839887	840558
fig|6666666.161614.peg.1456	CDS	gi_957788176_gb_LMYF01000004_1_Hypsibius_dujardini_scaffold4	840950	840717	234	hypothetical protein	- none -	840717	840950
fig|6666666.161614.peg.1457	CDS	gi_957788176_gb_LMYF01000004_1_Hypsibius_dujardini_scaffold4	841368	841054	315	hypothetical protein	- none -	841054	841368
fig|6666666.161614.peg.1458	CDS	gi_957788176_gb_LMYF01000004_1_Hypsibius_dujardini_scaffold4	842736	841447	1290	Enolase (EC 4.2.1.11)	Entner-Doudoroff Pathway, Glycolysis and Gluconeogenesis, Serine-glyoxylate cycle	841447	842736
fig|6666666.161614.peg.1459	CDS	gi_957788176_gb_LMYF01000004_1_Hypsibius_dujardini_scaffold4	843753	842839	915	ABC-type multidrug transport system, ATPase component	- none -	842839	843753
fig|6666666.161614.peg.1460	CDS	gi_957788176_gb_LMYF01000004_1_Hypsibius_dujardini_scaffold4	844465	843830	636	Carbonic anhydrase (EC 4.2.1.1)	- none -	843830	844465
fig|6666666.161614.peg.1461	CDS	gi_957788176_gb_LMYF01000004_1_Hypsibius_dujardini_scaffold4	844779	845099	321	hypothetical protein	- none -	844779	845099
fig|6666666.161614.peg.1462	CDS	gi_957788176_gb_LMYF01000004_1_Hypsibius_dujardini_scaffold4	845213	845875	663	Carbonic anhydrase (EC 4.2.1.1)	- none -	845213	845875
fig|6666666.161614.peg.1463	CDS	gi_957788176_gb_LMYF01000004_1_Hypsibius_dujardini_scaffold4	845948	847495	1548	Carbonic anhydrase (EC 4.2.1.1)	- none -	845948	847495
fig|6666666.161614.peg.1464	CDS	gi_957788176_gb_LMYF01000004_1_Hypsibius_dujardini_scaffold4	847505	850105	2601	Hypothetical transmembrane protein coupled to NADH-ubiquinone oxidoreductase chain 5 homolog	Respiratory Complex I	847505	850105
fig|6666666.161614.peg.1465	CDS	gi_957788176_gb_LMYF01000004_1_Hypsibius_dujardini_scaffold4	850117	851973	1857	NADH-ubiquinone oxidoreductase chain L (EC 1.6.5.3)	NADH ubiquinone oxidoreductase, Respiratory Complex I	850117	851973
fig|6666666.161614.peg.1466	CDS	gi_957788176_gb_LMYF01000004_1_Hypsibius_dujardini_scaffold4	852717	851974	744	Integral membrane protein TerC	- none -	851974	852717
fig|6666666.161614.peg.1467	CDS	gi_957788176_gb_LMYF01000004_1_Hypsibius_dujardini_scaffold4	853030	852785	246	hypothetical protein	- none -	852785	853030
fig|6666666.161614.peg.1468	CDS	gi_957788176_gb_LMYF01000004_1_Hypsibius_dujardini_scaffold4	854571	853090	1482	Multidrug efflux protein, outer membrane component	- none -	853090	854571
fig|6666666.161614.peg.1469	CDS	gi_957788176_gb_LMYF01000004_1_Hypsibius_dujardini_scaffold4	855878	854568	1311	RND efflux membrane fusion protein	- none -	854568	855878
fig|6666666.161614.peg.1470	CDS	gi_957788176_gb_LMYF01000004_1_Hypsibius_dujardini_scaffold4	857553	855889	1665	HlyB/MsbA family ABC transporter	- none -	855889	857553
fig|6666666.161614.peg.1471	CDS	gi_957788176_gb_LMYF01000004_1_Hypsibius_dujardini_scaffold4	857923	857633	291	hypothetical protein	- none -	857633	857923
fig|6666666.161614.peg.1472	CDS	gi_957788176_gb_LMYF01000004_1_Hypsibius_dujardini_scaffold4	858247	858002	246	hypothetical protein	- none -	858002	858247
fig|6666666.161614.peg.1473	CDS	gi_957788176_gb_LMYF01000004_1_Hypsibius_dujardini_scaffold4	859774	858257	1518	putative sugar transport protein	- none -	858257	859774
fig|6666666.161614.peg.1474	CDS	gi_957788176_gb_LMYF01000004_1_Hypsibius_dujardini_scaffold4	859938	861875	1938	Acetyl-coenzyme A synthetase (EC 6.2.1.1)	Pyruvate metabolism II: acetyl-CoA, acetogenesis from pyruvate	859938	861875
fig|6666666.161614.peg.1475	CDS	gi_957788176_gb_LMYF01000004_1_Hypsibius_dujardini_scaffold4	862021	861905	117	hypothetical protein	- none -	861905	862021
fig|6666666.161614.peg.1476	CDS	gi_957788176_gb_LMYF01000004_1_Hypsibius_dujardini_scaffold4	862183	863064	882	hypothetical protein	- none -	862183	863064
fig|6666666.161614.peg.1477	CDS	gi_957788176_gb_LMYF01000004_1_Hypsibius_dujardini_scaffold4	863646	863071	576	hypothetical protein	- none -	863071	863646
fig|6666666.161614.peg.1478	CDS	gi_957788176_gb_LMYF01000004_1_Hypsibius_dujardini_scaffold4	863917	863711	207	hypothetical protein	- none -	863711	863917
fig|6666666.161614.peg.1479	CDS	gi_957788176_gb_LMYF01000004_1_Hypsibius_dujardini_scaffold4	864808	863921	888	hypothetical protein	- none -	863921	864808
fig|6666666.161614.peg.1480	CDS	gi_957788176_gb_LMYF01000004_1_Hypsibius_dujardini_scaffold4	866008	864836	1173	hypothetical protein	- none -	864836	866008
fig|6666666.161614.peg.1481	CDS	gi_957788176_gb_LMYF01000004_1_Hypsibius_dujardini_scaffold4	866512	866027	486	hypothetical protein	- none -	866027	866512
fig|6666666.161614.peg.1482	CDS	gi_957788176_gb_LMYF01000004_1_Hypsibius_dujardini_scaffold4	866832	866623	210	hypothetical protein	- none -	866623	866832
fig|6666666.161614.peg.1483	CDS	gi_957788176_gb_LMYF01000004_1_Hypsibius_dujardini_scaffold4	867042	868229	1188	2-amino-3-ketobutyrate coenzyme A ligase (EC 2.3.1.29)	Glycine Biosynthesis, Glycine and Serine Utilization	867042	868229
fig|6666666.161614.peg.1484	CDS	gi_957788176_gb_LMYF01000004_1_Hypsibius_dujardini_scaffold4	868459	868587	129	hypothetical protein	- none -	868459	868587
fig|6666666.161614.peg.1485	CDS	gi_957788176_gb_LMYF01000004_1_Hypsibius_dujardini_scaffold4	868667	869194	528	hypothetical protein	- none -	868667	869194
fig|6666666.161614.peg.1486	CDS	gi_957788176_gb_LMYF01000004_1_Hypsibius_dujardini_scaffold4	869226	870062	837	Beta-lactamase (EC 3.5.2.6)	Beta-lactamase	869226	870062
fig|6666666.161614.peg.1487	CDS	gi_957788176_gb_LMYF01000004_1_Hypsibius_dujardini_scaffold4	870145	871146	1002	BatB	Aerotolerance operon in Bacteroides and potentially orthologous operons in other organisms	870145	871146
fig|6666666.161614.peg.1488	CDS	gi_957788176_gb_LMYF01000004_1_Hypsibius_dujardini_scaffold4	871143	871766	624	hypothetical protein	- none -	871143	871766
fig|6666666.161614.peg.1489	CDS	gi_957788176_gb_LMYF01000004_1_Hypsibius_dujardini_scaffold4	871875	873899	2025	1-hydroxy-2-methyl-2-(E)-butenyl 4-diphosphate synthase (EC 1.17.7.1)	Isoprenoid Biosynthesis, Nonmevalonate Branch of Isoprenoid Biosynthesis	871875	873899
fig|6666666.161614.peg.1490	CDS	gi_957788176_gb_LMYF01000004_1_Hypsibius_dujardini_scaffold4	873908	874579	672	putative membrane protein	- none -	873908	874579
fig|6666666.161614.peg.1491	CDS	gi_957788176_gb_LMYF01000004_1_Hypsibius_dujardini_scaffold4	874632	875579	948	transcriptional regulator, putative	- none -	874632	875579
fig|6666666.161614.peg.1492	CDS	gi_957788176_gb_LMYF01000004_1_Hypsibius_dujardini_scaffold4	875656	876108	453	hypothetical protein	- none -	875656	876108
fig|6666666.161614.peg.1493	CDS	gi_957788176_gb_LMYF01000004_1_Hypsibius_dujardini_scaffold4	876120	876581	462	Glyoxalase family protein	- none -	876120	876581
fig|6666666.161614.peg.1494	CDS	gi_957788176_gb_LMYF01000004_1_Hypsibius_dujardini_scaffold4	876649	878247	1599	L-aspartate oxidase (EC 1.4.3.16)	Mycobacterium virulence operon possibly involved in quinolinate biosynthesis, NAD and NADP cofactor biosynthesis global	876649	878247
fig|6666666.161614.peg.1495	CDS	gi_957788176_gb_LMYF01000004_1_Hypsibius_dujardini_scaffold4	878267	879145	879	Lipid A biosynthesis lauroyl acyltransferase (EC 2.3.1.-)	KDO2-Lipid A biosynthesis	878267	879145
fig|6666666.161614.peg.1496	CDS	gi_957788176_gb_LMYF01000004_1_Hypsibius_dujardini_scaffold4	879194	879331	138	hypothetical protein	- none -	879194	879331
fig|6666666.161614.peg.1497	CDS	gi_957788176_gb_LMYF01000004_1_Hypsibius_dujardini_scaffold4	879379	879780	402	hypothetical protein	- none -	879379	879780
fig|6666666.161614.peg.1498	CDS	gi_957788176_gb_LMYF01000004_1_Hypsibius_dujardini_scaffold4	879786	880439	654	hypothetical protein	- none -	879786	880439
fig|6666666.161614.peg.1499	CDS	gi_957788176_gb_LMYF01000004_1_Hypsibius_dujardini_scaffold4	880463	881209	747	Sensor histidine kinase	- none -	880463	881209
fig|6666666.161614.peg.1500	CDS	gi_957788176_gb_LMYF01000004_1_Hypsibius_dujardini_scaffold4	881223	881876	654	Two-component response regulator yhcZ	- none -	881223	881876
fig|6666666.161614.peg.1501	CDS	gi_957788176_gb_LMYF01000004_1_Hypsibius_dujardini_scaffold4	883288	881879	1410	Metallo-beta-lactamase family protein	- none -	881879	883288
fig|6666666.161614.peg.1502	CDS	gi_957788176_gb_LMYF01000004_1_Hypsibius_dujardini_scaffold4	883711	883373	339	hypothetical protein	- none -	883373	883711
fig|6666666.161614.peg.1503	CDS	gi_957788176_gb_LMYF01000004_1_Hypsibius_dujardini_scaffold4	884469	883795	675	Inactive homolog of metal-dependent proteases, putative molecular chaperone	- none -	883795	884469
fig|6666666.161614.peg.1504	CDS	gi_957788176_gb_LMYF01000004_1_Hypsibius_dujardini_scaffold4	885102	884470	633	3-hydroxybutyryl-CoA dehydrogenase (EC 1.1.1.157)	Acetyl-CoA fermentation to Butyrate, Butanol Biosynthesis, Polyhydroxybutyrate metabolism	884470	885102
fig|6666666.161614.peg.1505	CDS	gi_957788176_gb_LMYF01000004_1_Hypsibius_dujardini_scaffold4	885169	885549	381	Endoribonuclease L-PSP	CBSS-176299.4.peg.1996A	885169	885549
fig|6666666.161614.peg.1506	CDS	gi_957788176_gb_LMYF01000004_1_Hypsibius_dujardini_scaffold4	885557	886651	1095	hypothetical protein	- none -	885557	886651
fig|6666666.161614.peg.1507	CDS	gi_957788176_gb_LMYF01000004_1_Hypsibius_dujardini_scaffold4	887128	886655	474	hypothetical protein	- none -	886655	887128
fig|6666666.161614.peg.1508	CDS	gi_957788176_gb_LMYF01000004_1_Hypsibius_dujardini_scaffold4	889134	887182	1953	Peptidase	- none -	887182	889134
fig|6666666.161614.peg.1509	CDS	gi_957788176_gb_LMYF01000004_1_Hypsibius_dujardini_scaffold4	889922	889215	708	FIG006611: nucleotidyltransferase	- none -	889215	889922
fig|6666666.161614.peg.1510	CDS	gi_957788176_gb_LMYF01000004_1_Hypsibius_dujardini_scaffold4	891394	889928	1467	COG3178: Predicted phosphotransferase related to Ser/Thr protein kinases	- none -	889928	891394
fig|6666666.161614.peg.1511	CDS	gi_957788176_gb_LMYF01000004_1_Hypsibius_dujardini_scaffold4	891487	894858	3372	B12 binding domain / kinase domain / Methylmalonyl-CoA mutase (EC 5.4.99.2)	G3E family of P-loop GTPases (metallocenter biosynthesis), Serine-glyoxylate cycle	891487	894858
fig|6666666.161614.peg.1512	CDS	gi_957788176_gb_LMYF01000004_1_Hypsibius_dujardini_scaffold4	895499	894861	639	hypothetical protein	- none -	894861	895499
fig|6666666.161614.peg.1513	CDS	gi_957788176_gb_LMYF01000004_1_Hypsibius_dujardini_scaffold4	895720	896544	825	N-acetylmuramoyl-L-alanine amidase (EC 3.5.1.28)	Murein Hydrolases, Recycling of Peptidoglycan Amino Acids	895720	896544
fig|6666666.161614.peg.1514	CDS	gi_957788176_gb_LMYF01000004_1_Hypsibius_dujardini_scaffold4	896647	899277	2631	hypothetical protein	- none -	896647	899277
fig|6666666.161614.peg.1515	CDS	gi_957788176_gb_LMYF01000004_1_Hypsibius_dujardini_scaffold4	900815	899274	1542	Arylsulfatase (EC 3.1.6.1)	Galactosylceramide and Sulfatide metabolism, Sulfatases and sulfatase modifying factor 1	899274	900815
fig|6666666.161614.peg.1516	CDS	gi_957788176_gb_LMYF01000004_1_Hypsibius_dujardini_scaffold4	900869	901813	945	hypothetical protein	- none -	900869	901813
fig|6666666.161614.peg.1517	CDS	gi_957788176_gb_LMYF01000004_1_Hypsibius_dujardini_scaffold4	903093	901810	1284	Error-prone, lesion bypass DNA polymerase V (UmuC)	DNA repair, bacterial UmuCD system	901810	903093
fig|6666666.161614.peg.1518	CDS	gi_957788176_gb_LMYF01000004_1_Hypsibius_dujardini_scaffold4	903521	903090	432	Error-prone repair protein UmuD	DNA repair, bacterial UmuCD system	903090	903521
fig|6666666.161614.peg.1519	CDS	gi_957788176_gb_LMYF01000004_1_Hypsibius_dujardini_scaffold4	903736	903581	156	hypothetical protein	- none -	903581	903736
fig|6666666.161614.peg.1520	CDS	gi_957788176_gb_LMYF01000004_1_Hypsibius_dujardini_scaffold4	903723	904337	615	2'-5' RNA ligase	RNA processing orphans	903723	904337
fig|6666666.161614.peg.1521	CDS	gi_957788176_gb_LMYF01000004_1_Hypsibius_dujardini_scaffold4	904413	904538	126	hypothetical protein	- none -	904413	904538
fig|6666666.161614.peg.1522	CDS	gi_957788176_gb_LMYF01000004_1_Hypsibius_dujardini_scaffold4	904507	905616	1110	Radical SAM domain protein	- none -	904507	905616
fig|6666666.161614.peg.1523	CDS	gi_957788176_gb_LMYF01000004_1_Hypsibius_dujardini_scaffold4	905637	906689	1053	hypothetical protein	- none -	905637	906689
fig|6666666.161614.peg.1524	CDS	gi_957788176_gb_LMYF01000004_1_Hypsibius_dujardini_scaffold4	906807	907109	303	hypothetical protein	- none -	906807	907109
fig|6666666.161614.peg.1525	CDS	gi_957788176_gb_LMYF01000004_1_Hypsibius_dujardini_scaffold4	907208	910432	3225	TonB-dependent receptor	Ton and Tol transport systems	907208	910432
fig|6666666.161614.peg.1526	CDS	gi_957788176_gb_LMYF01000004_1_Hypsibius_dujardini_scaffold4	910799	910918	120	hypothetical protein	- none -	910799	910918
fig|6666666.161614.peg.1527	CDS	gi_957788176_gb_LMYF01000004_1_Hypsibius_dujardini_scaffold4	911004	911141	138	hypothetical protein	- none -	911004	911141
fig|6666666.161614.rna.15	RNA	gi_957788176_gb_LMYF01000004_1_Hypsibius_dujardini_scaffold4	911224	911296	73	tRNA-Pseudo-TGG	- none -	911224	911296
fig|6666666.161614.rna.16	RNA	gi_957788176_gb_LMYF01000004_1_Hypsibius_dujardini_scaffold4	911388	911460	73	tRNA-Glu-TTC	- none -	911388	911460
fig|6666666.161614.rna.17	RNA	gi_957788176_gb_LMYF01000004_1_Hypsibius_dujardini_scaffold4	911464	911535	72	tRNA-Asp-GTC	- none -	911464	911535
fig|6666666.161614.rna.18	RNA	gi_957788176_gb_LMYF01000004_1_Hypsibius_dujardini_scaffold4	911542	911613	72	tRNA-Gln-TTG	- none -	911542	911613
fig|6666666.161614.rna.19	RNA	gi_957788176_gb_LMYF01000004_1_Hypsibius_dujardini_scaffold4	911626	911698	73	tRNA-His-GTG	- none -	911626	911698
fig|6666666.161614.rna.20	RNA	gi_957788176_gb_LMYF01000004_1_Hypsibius_dujardini_scaffold4	911810	911882	73	tRNA-Arg-ACG	tRNAs	911810	911882
fig|6666666.161614.rna.21	RNA	gi_957788176_gb_LMYF01000004_1_Hypsibius_dujardini_scaffold4	911895	911966	72	tRNA-Met-CAT	- none -	911895	911966
fig|6666666.161614.rna.22	RNA	gi_957788176_gb_LMYF01000004_1_Hypsibius_dujardini_scaffold4	911973	912047	75	tRNA-Lys-TTT	- none -	911973	912047
fig|6666666.161614.rna.23	RNA	gi_957788176_gb_LMYF01000004_1_Hypsibius_dujardini_scaffold4	912052	912123	72	tRNA-Asn-GTT	- none -	912052	912123
fig|6666666.161614.rna.24	RNA	gi_957788176_gb_LMYF01000004_1_Hypsibius_dujardini_scaffold4	912463	912547	85	tRNA-Ser-GCT	- none -	912463	912547
fig|6666666.161614.rna.25	RNA	gi_957788176_gb_LMYF01000004_1_Hypsibius_dujardini_scaffold4	912618	912691	74	tRNA-Phe-GAA	tRNAs	912618	912691
fig|6666666.161614.peg.1528	CDS	gi_957788176_gb_LMYF01000004_1_Hypsibius_dujardini_scaffold4	912720	913205	486	DUF458 domain-containing protein	- none -	912720	913205
fig|6666666.161614.peg.1529	CDS	gi_957788176_gb_LMYF01000004_1_Hypsibius_dujardini_scaffold4	913308	914378	1071	hypothetical protein	- none -	913308	914378
fig|6666666.161614.peg.1530	CDS	gi_957788176_gb_LMYF01000004_1_Hypsibius_dujardini_scaffold4	914635	914775	141	hypothetical protein	- none -	914635	914775
fig|6666666.161614.peg.1531	CDS	gi_957788176_gb_LMYF01000004_1_Hypsibius_dujardini_scaffold4	914800	914916	117	hypothetical protein	- none -	914800	914916
fig|6666666.161614.peg.1532	CDS	gi_957788176_gb_LMYF01000004_1_Hypsibius_dujardini_scaffold4	915027	916142	1116	Putative stomatin/prohibitin-family membrane protease subunit PA4582	- none -	915027	916142
fig|6666666.161614.peg.1533	CDS	gi_957788176_gb_LMYF01000004_1_Hypsibius_dujardini_scaffold4	916383	917951	1569	hypothetical protein	- none -	916383	917951
fig|6666666.161614.peg.1534	CDS	gi_957788176_gb_LMYF01000004_1_Hypsibius_dujardini_scaffold4	917969	919417	1449	Protein RtcB	- none -	917969	919417
fig|6666666.161614.peg.1535	CDS	gi_957788176_gb_LMYF01000004_1_Hypsibius_dujardini_scaffold4	920843	919476	1368	hypothetical protein	- none -	919476	920843
fig|6666666.161614.peg.1536	CDS	gi_957788176_gb_LMYF01000004_1_Hypsibius_dujardini_scaffold4	922020	920935	1086	hypothetical protein	- none -	920935	922020
fig|6666666.161614.peg.1537	CDS	gi_957788176_gb_LMYF01000004_1_Hypsibius_dujardini_scaffold4	923231	922062	1170	N-acetylglucosamine related transporter, NagX	Chitin and N-acetylglucosamine utilization	922062	923231
fig|6666666.161614.peg.1538	CDS	gi_957788176_gb_LMYF01000004_1_Hypsibius_dujardini_scaffold4	923587	924084	498	Transcriptional activator RfaH	Transcription factors bacterial	923587	924084
fig|6666666.161614.peg.1539	CDS	gi_957788176_gb_LMYF01000004_1_Hypsibius_dujardini_scaffold4	924100	924903	804	hypothetical protein	- none -	924100	924903
fig|6666666.161614.peg.1540	CDS	gi_957788176_gb_LMYF01000004_1_Hypsibius_dujardini_scaffold4	924939	927335	2397	Tyrosine-protein kinase EpsD (EC 2.7.10.2)	Exopolysaccharide Biosynthesis	924939	927335
fig|6666666.161614.peg.1541	CDS	gi_957788176_gb_LMYF01000004_1_Hypsibius_dujardini_scaffold4	927338	928291	954	UDP-glucose 4-epimerase (EC 5.1.3.2)	CBSS-296591.1.peg.2330, Lactose and Galactose Uptake and Utilization, N-linked Glycosylation in Bacteria, Rhamnose containing glycans	927338	928291
fig|6666666.161614.peg.1542	CDS	gi_957788176_gb_LMYF01000004_1_Hypsibius_dujardini_scaffold4	928294	929352	1059	dTDP-glucose 4,6-dehydratase (EC 4.2.1.46)	CBSS-296591.1.peg.2330, Rhamnose containing glycans, dTDP-rhamnose synthesis	928294	929352
fig|6666666.161614.peg.1543	CDS	gi_957788176_gb_LMYF01000004_1_Hypsibius_dujardini_scaffold4	929374	930525	1152	acyltransferase 3	- none -	929374	930525
fig|6666666.161614.peg.1544	CDS	gi_957788176_gb_LMYF01000004_1_Hypsibius_dujardini_scaffold4	930556	931419	864	Glucose-1-phosphate thymidylyltransferase (EC 2.7.7.24)	Rhamnose containing glycans, dTDP-rhamnose synthesis	930556	931419
fig|6666666.161614.peg.1545	CDS	gi_957788176_gb_LMYF01000004_1_Hypsibius_dujardini_scaffold4	931421	931996	576	2,3,4,5-tetrahydropyridine-2,6-dicarboxylate N-acetyltransferase (EC 2.3.1.89)	Lysine Biosynthesis DAP Pathway, GJO scratch	931421	931996
fig|6666666.161614.peg.1546	CDS	gi_957788176_gb_LMYF01000004_1_Hypsibius_dujardini_scaffold4	931993	932892	900	UDP-2-acetamido-2-deoxy-D-glucuronic acid dehydrogenase (NAD+ cofactor)	- none -	931993	932892
fig|6666666.161614.peg.1547	CDS	gi_957788176_gb_LMYF01000004_1_Hypsibius_dujardini_scaffold4	932905	933543	639	hypothetical protein	- none -	932905	933543
fig|6666666.161614.peg.1548	CDS	gi_957788176_gb_LMYF01000004_1_Hypsibius_dujardini_scaffold4	936092	933546	2547	hypothetical protein	- none -	933546	936092
fig|6666666.161614.peg.1549	CDS	gi_957788176_gb_LMYF01000004_1_Hypsibius_dujardini_scaffold4	936234	937253	1020	UDP-N-acetylglucosamine 4,6-dehydratase (EC 4.2.1.-)	CBSS-296591.1.peg.2330, N-linked Glycosylation in Bacteria	936234	937253
fig|6666666.161614.peg.1550	CDS	gi_957788176_gb_LMYF01000004_1_Hypsibius_dujardini_scaffold4	937274	938419	1146	UDP-4-amino-4-deoxy-L-arabinose--oxoglutarate aminotransferase (EC 2.6.1.-)	- none -	937274	938419
fig|6666666.161614.peg.1551	CDS	gi_957788176_gb_LMYF01000004_1_Hypsibius_dujardini_scaffold4	938632	940095	1464	N-Acetylneuraminate cytidylyltransferase (EC 2.7.7.43)	CMP-N-acetylneuraminate Biosynthesis, Sialic Acid Metabolism	938632	940095
fig|6666666.161614.peg.1552	CDS	gi_957788176_gb_LMYF01000004_1_Hypsibius_dujardini_scaffold4	940082	941122	1041	N-acetylneuraminate synthase (EC 2.5.1.56)	CMP-N-acetylneuraminate Biosynthesis, Sialic Acid Metabolism	940082	941122
fig|6666666.161614.peg.1553	CDS	gi_957788176_gb_LMYF01000004_1_Hypsibius_dujardini_scaffold4	941135	941830	696	N-Acetylneuraminate cytidylyltransferase (EC 2.7.7.43)	CMP-N-acetylneuraminate Biosynthesis, Sialic Acid Metabolism	941135	941830
fig|6666666.161614.peg.1554	CDS	gi_957788176_gb_LMYF01000004_1_Hypsibius_dujardini_scaffold4	942386	942784	399	hypothetical protein	- none -	942386	942784
fig|6666666.161614.peg.1555	CDS	gi_957788176_gb_LMYF01000004_1_Hypsibius_dujardini_scaffold4	942795	944087	1293	Pleiotropic regulatory protein	- none -	942795	944087
fig|6666666.161614.peg.1556	CDS	gi_957788176_gb_LMYF01000004_1_Hypsibius_dujardini_scaffold4	944151	944786	636	hypothetical protein	- none -	944151	944786
fig|6666666.161614.peg.1557	CDS	gi_957788176_gb_LMYF01000004_1_Hypsibius_dujardini_scaffold4	944791	945942	1152	Legionaminic acid biosynthesis protein PtmG	- none -	944791	945942
fig|6666666.161614.peg.1558	CDS	gi_957788176_gb_LMYF01000004_1_Hypsibius_dujardini_scaffold4	945944	946552	609	Imidazole glycerol phosphate synthase amidotransferase subunit (EC 2.4.2.-)	Histidine Biosynthesis	945944	946552
fig|6666666.161614.peg.1559	CDS	gi_957788176_gb_LMYF01000004_1_Hypsibius_dujardini_scaffold4	946536	947303	768	Imidazole glycerol phosphate synthase cyclase subunit (EC 4.1.3.-)	Histidine Biosynthesis	946536	947303
fig|6666666.161614.peg.1560	CDS	gi_957788176_gb_LMYF01000004_1_Hypsibius_dujardini_scaffold4	947328	948269	942	hypothetical protein	- none -	947328	948269
fig|6666666.161614.peg.1561	CDS	gi_957788176_gb_LMYF01000004_1_Hypsibius_dujardini_scaffold4	948274	948867	594	acetyltransferase, GNAT family	- none -	948274	948867
fig|6666666.161614.peg.1562	CDS	gi_957788176_gb_LMYF01000004_1_Hypsibius_dujardini_scaffold4	948879	950111	1233	hypothetical protein	- none -	948879	950111
fig|6666666.161614.peg.1563	CDS	gi_957788176_gb_LMYF01000004_1_Hypsibius_dujardini_scaffold4	950108	951379	1272	Polysaccharide biosynthesis protein	- none -	950108	951379
fig|6666666.161614.peg.1564	CDS	gi_957788176_gb_LMYF01000004_1_Hypsibius_dujardini_scaffold4	951379	952437	1059	Glycosyltransferase	- none -	951379	952437
fig|6666666.161614.peg.1565	CDS	gi_957788176_gb_LMYF01000004_1_Hypsibius_dujardini_scaffold4	952565	952434	132	hypothetical protein	- none -	952434	952565
fig|6666666.161614.peg.1566	CDS	gi_957788176_gb_LMYF01000004_1_Hypsibius_dujardini_scaffold4	952555	953316	762	hypothetical protein	- none -	952555	953316
fig|6666666.161614.peg.1567	CDS	gi_957788176_gb_LMYF01000004_1_Hypsibius_dujardini_scaffold4	953323	955227	1905	Asparagine synthetase [glutamine-hydrolyzing] (EC 6.3.5.4)	Cyanophycin Metabolism, Glutamine, Glutamate, Aspartate and Asparagine Biosynthesis	953323	955227
fig|6666666.161614.peg.1568	CDS	gi_957788176_gb_LMYF01000004_1_Hypsibius_dujardini_scaffold4	955574	956467	894	hypothetical protein	- none -	955574	956467
fig|6666666.161614.peg.1569	CDS	gi_957788176_gb_LMYF01000004_1_Hypsibius_dujardini_scaffold4	956457	957560	1104	Glycosyl transferase, group 1	- none -	956457	957560
fig|6666666.161614.peg.1570	CDS	gi_957788176_gb_LMYF01000004_1_Hypsibius_dujardini_scaffold4	958892	957537	1356	hypothetical protein	- none -	957537	958892
fig|6666666.161614.peg.1571	CDS	gi_957788176_gb_LMYF01000004_1_Hypsibius_dujardini_scaffold4	959011	960210	1200	Glycosyl transferase, group 1 family protein	Exopolysaccharide Biosynthesis	959011	960210
fig|6666666.161614.peg.1572	CDS	gi_957788176_gb_LMYF01000004_1_Hypsibius_dujardini_scaffold4	960203	960946	744	Capsular polysaccharide synthesis enzyme Cap8C; Manganese-dependent protein-tyrosine phosphatase (EC 3.1.3.48)	Exopolysaccharide Biosynthesis	960203	960946
fig|6666666.161614.peg.1573	CDS	gi_957788176_gb_LMYF01000004_1_Hypsibius_dujardini_scaffold4	961031	961909	879	Transcriptional regulator, MerR family	Cobalt-zinc-cadmium resistance	961031	961909
fig|6666666.161614.peg.1574	CDS	gi_957788176_gb_LMYF01000004_1_Hypsibius_dujardini_scaffold4	962048	962548	501	RNA polymerase ECF-type sigma factor	- none -	962048	962548
fig|6666666.161614.peg.1575	CDS	gi_957788176_gb_LMYF01000004_1_Hypsibius_dujardini_scaffold4	962556	964034	1479	Phytoene dehydrogenase (EC 1.14.99.-)	Protein deglycation, Proteorhodopsin	962556	964034
fig|6666666.161614.peg.1576	CDS	gi_957788176_gb_LMYF01000004_1_Hypsibius_dujardini_scaffold4	964051	964887	837	Phytoene synthase (EC 2.5.1.32)	Protein deglycation, Proteorhodopsin	964051	964887
fig|6666666.161614.peg.1577	CDS	gi_957788176_gb_LMYF01000004_1_Hypsibius_dujardini_scaffold4	964892	965431	540	Isopentenyl-diphosphate delta-isomerase (EC 5.3.3.2)	Isoprenoid Biosynthesis	964892	965431
fig|6666666.161614.peg.1578	CDS	gi_957788176_gb_LMYF01000004_1_Hypsibius_dujardini_scaffold4	965535	965960	426	Beta-carotene hydroxylase	Myxoxanthophyll biosynthesis in Cyanobacteria	965535	965960
fig|6666666.161614.peg.1579	CDS	gi_957788176_gb_LMYF01000004_1_Hypsibius_dujardini_scaffold4	966000	967142	1143	Lycopene beta cyclase (EC 1.14.-.-)	Proteorhodopsin	966000	967142
fig|6666666.161614.peg.1580	CDS	gi_957788176_gb_LMYF01000004_1_Hypsibius_dujardini_scaffold4	967586	967146	441	hypothetical protein	- none -	967146	967586
fig|6666666.161614.peg.1581	CDS	gi_957788176_gb_LMYF01000004_1_Hypsibius_dujardini_scaffold4	969043	967682	1362	Cell division protein FtsH (EC 3.4.24.-)	Bacterial Cell Division, Cell division-ribosomal stress proteins cluster, Folate biosynthesis cluster	967682	969043
fig|6666666.161614.peg.1582	CDS	gi_957788176_gb_LMYF01000004_1_Hypsibius_dujardini_scaffold4	969902	969048	855	hypothetical protein	- none -	969048	969902
fig|6666666.161614.peg.1583	CDS	gi_957788176_gb_LMYF01000004_1_Hypsibius_dujardini_scaffold4	970600	969914	687	hypothetical protein	- none -	969914	970600
fig|6666666.161614.peg.1584	CDS	gi_957788176_gb_LMYF01000004_1_Hypsibius_dujardini_scaffold4	974194	970601	3594	hypothetical protein	- none -	970601	974194
fig|6666666.161614.peg.1585	CDS	gi_957788176_gb_LMYF01000004_1_Hypsibius_dujardini_scaffold4	975611	974196	1416	hypothetical protein	- none -	974196	975611
fig|6666666.161614.peg.1586	CDS	gi_957788176_gb_LMYF01000004_1_Hypsibius_dujardini_scaffold4	980101	975608	4494	hypothetical protein	- none -	975608	980101
fig|6666666.161614.peg.1587	CDS	gi_957788176_gb_LMYF01000004_1_Hypsibius_dujardini_scaffold4	982914	980161	2754	hypothetical protein	- none -	980161	982914
fig|6666666.161614.peg.1588	CDS	gi_957788176_gb_LMYF01000004_1_Hypsibius_dujardini_scaffold4	986216	982908	3309	Complete genome; segment 6/17	- none -	982908	986216
fig|6666666.161614.peg.1589	CDS	gi_957788176_gb_LMYF01000004_1_Hypsibius_dujardini_scaffold4	986560	986222	339	GPW/gp25 family protein	- none -	986222	986560
fig|6666666.161614.peg.1590	CDS	gi_957788176_gb_LMYF01000004_1_Hypsibius_dujardini_scaffold4	986934	986644	291	FIG00877092: hypothetical protein	- none -	986644	986934
fig|6666666.161614.peg.1591	CDS	gi_957788176_gb_LMYF01000004_1_Hypsibius_dujardini_scaffold4	988689	986941	1749	VgrG protein	- none -	986941	988689
fig|6666666.161614.peg.1592	CDS	gi_957788176_gb_LMYF01000004_1_Hypsibius_dujardini_scaffold4	989364	988693	672	hypothetical protein	- none -	988693	989364
fig|6666666.161614.peg.1593	CDS	gi_957788176_gb_LMYF01000004_1_Hypsibius_dujardini_scaffold4	989543	989364	180	hypothetical protein	- none -	989364	989543
fig|6666666.161614.peg.1594	CDS	gi_957788176_gb_LMYF01000004_1_Hypsibius_dujardini_scaffold4	990031	989543	489	hypothetical protein	- none -	989543	990031
fig|6666666.161614.peg.1595	CDS	gi_957788176_gb_LMYF01000004_1_Hypsibius_dujardini_scaffold4	990479	990048	432	FIG01123047: hypothetical protein	- none -	990048	990479
fig|6666666.161614.peg.1596	CDS	gi_957788176_gb_LMYF01000004_1_Hypsibius_dujardini_scaffold4	992555	990516	2040	Phage tail sheath protein FI	- none -	990516	992555
fig|6666666.161614.peg.1597	CDS	gi_957788176_gb_LMYF01000004_1_Hypsibius_dujardini_scaffold4	994055	992571	1485	Phage tail sheath protein FI	- none -	992571	994055
fig|6666666.161614.peg.1598	CDS	gi_957788176_gb_LMYF01000004_1_Hypsibius_dujardini_scaffold4	995324	994074	1251	hypothetical protein	- none -	994074	995324
fig|6666666.161614.peg.1599	CDS	gi_957788176_gb_LMYF01000004_1_Hypsibius_dujardini_scaffold4	995932	995333	600	hypothetical protein	- none -	995333	995932
fig|6666666.161614.peg.1600	CDS	gi_957788176_gb_LMYF01000004_1_Hypsibius_dujardini_scaffold4	996264	996088	177	hypothetical protein	- none -	996088	996264
fig|6666666.161614.peg.1601	CDS	gi_957788176_gb_LMYF01000004_1_Hypsibius_dujardini_scaffold4	996529	996645	117	hypothetical protein	- none -	996529	996645
fig|6666666.161614.peg.1602	CDS	gi_957788176_gb_LMYF01000004_1_Hypsibius_dujardini_scaffold4	996651	998570	1920	hypothetical protein	- none -	996651	998570
fig|6666666.161614.peg.1603	CDS	gi_957788176_gb_LMYF01000004_1_Hypsibius_dujardini_scaffold4	998612	999118	507	hypothetical protein	- none -	998612	999118
fig|6666666.161614.rna.26	RNA	gi_957788176_gb_LMYF01000004_1_Hypsibius_dujardini_scaffold4	999268	999197	72	tRNA-Arg-CCG	tRNAs	999197	999268
fig|6666666.161614.peg.1604	CDS	gi_957788176_gb_LMYF01000004_1_Hypsibius_dujardini_scaffold4	999853	999275	579	Multiple antibiotic resistance protein marC	- none -	999275	999853
fig|6666666.161614.peg.1605	CDS	gi_957788176_gb_LMYF01000004_1_Hypsibius_dujardini_scaffold4	999981	1001141	1161	hypothetical protein	- none -	999981	1001141
fig|6666666.161614.peg.1606	CDS	gi_957788176_gb_LMYF01000004_1_Hypsibius_dujardini_scaffold4	1001343	1001122	222	hypothetical protein	- none -	1001122	1001343
fig|6666666.161614.peg.1607	CDS	gi_957788176_gb_LMYF01000004_1_Hypsibius_dujardini_scaffold4	1003296	1001353	1944	TonB-dependent receptor	Ton and Tol transport systems	1001353	1003296
fig|6666666.161614.peg.1608	CDS	gi_957788176_gb_LMYF01000004_1_Hypsibius_dujardini_scaffold4	1003889	1003755	135	hypothetical protein	- none -	1003755	1003889
fig|6666666.161614.peg.1609	CDS	gi_957788176_gb_LMYF01000004_1_Hypsibius_dujardini_scaffold4	1003900	1004655	756	hypothetical protein	- none -	1003900	1004655
fig|6666666.161614.peg.1610	CDS	gi_957788176_gb_LMYF01000004_1_Hypsibius_dujardini_scaffold4	1006751	1004670	2082	TonB-dependent receptor	Ton and Tol transport systems	1004670	1006751
fig|6666666.161614.peg.1611	CDS	gi_957788176_gb_LMYF01000004_1_Hypsibius_dujardini_scaffold4	1006797	1008143	1347	hypothetical protein	- none -	1006797	1008143
fig|6666666.161614.peg.1612	CDS	gi_957788176_gb_LMYF01000004_1_Hypsibius_dujardini_scaffold4	1008143	1009306	1164	methionine gamma-lyase	- none -	1008143	1009306
fig|6666666.161614.peg.1613	CDS	gi_957788176_gb_LMYF01000004_1_Hypsibius_dujardini_scaffold4	1009369	1010820	1452	Outer membrane efflux protein	- none -	1009369	1010820
fig|6666666.161614.peg.1614	CDS	gi_957788176_gb_LMYF01000004_1_Hypsibius_dujardini_scaffold4	1010834	1012192	1359	Macrolide-specific efflux protein MacA	- none -	1010834	1012192
fig|6666666.161614.peg.1615	CDS	gi_957788176_gb_LMYF01000004_1_Hypsibius_dujardini_scaffold4	1012327	1013367	1041	Glycerol-3-phosphate dehydrogenase [NAD(P)+] (EC 1.1.1.94)	Glycerol and Glycerol-3-phosphate Uptake and Utilization, Glycerolipid and Glycerophospholipid Metabolism in Bacteria	1012327	1013367
fig|6666666.161614.peg.1616	CDS	gi_957788176_gb_LMYF01000004_1_Hypsibius_dujardini_scaffold4	1013549	1013752	204	hypothetical protein	- none -	1013549	1013752
fig|6666666.161614.peg.1617	CDS	gi_957788176_gb_LMYF01000004_1_Hypsibius_dujardini_scaffold4	1014912	1013749	1164	Hypothetical radical SAM family enzyme, NOT coproporphyrinogen III oxidase, oxygen-independent	Heat shock dnaK gene cluster extended	1013749	1014912
fig|6666666.161614.peg.1618	CDS	gi_957788176_gb_LMYF01000004_1_Hypsibius_dujardini_scaffold4	1014913	1016712	1800	hypothetical protein	- none -	1014913	1016712
fig|6666666.161614.peg.1619	CDS	gi_957788176_gb_LMYF01000004_1_Hypsibius_dujardini_scaffold4	1016800	1017726	927	hypothetical protein	- none -	1016800	1017726
fig|6666666.161614.peg.1620	CDS	gi_957788176_gb_LMYF01000004_1_Hypsibius_dujardini_scaffold4	1017766	1018566	801	uroporphyrinogen-III synthase HemD, putative	- none -	1017766	1018566
fig|6666666.161614.peg.1621	CDS	gi_957788176_gb_LMYF01000004_1_Hypsibius_dujardini_scaffold4	1018671	1020728	2058	Thymidylate kinase (EC 2.7.4.9)	pyrimidine conversions	1018671	1020728
fig|6666666.161614.peg.1622	CDS	gi_957788176_gb_LMYF01000004_1_Hypsibius_dujardini_scaffold4	1020876	1022189	1314	GldJ	- none -	1020876	1022189
fig|6666666.161614.peg.1623	CDS	gi_957788176_gb_LMYF01000004_1_Hypsibius_dujardini_scaffold4	1022308	1023126	819	FIG00908070: hypothetical protein	- none -	1022308	1023126
fig|6666666.161614.peg.1624	CDS	gi_957788176_gb_LMYF01000004_1_Hypsibius_dujardini_scaffold4	1023286	1023155	132	hypothetical protein	- none -	1023155	1023286
fig|6666666.161614.peg.1625	CDS	gi_957788176_gb_LMYF01000004_1_Hypsibius_dujardini_scaffold4	1023246	1024781	1536	hypothetical protein	- none -	1023246	1024781
fig|6666666.161614.peg.1626	CDS	gi_957788176_gb_LMYF01000004_1_Hypsibius_dujardini_scaffold4	1024793	1025815	1023	GldN	- none -	1024793	1025815
fig|6666666.161614.peg.1627	CDS	gi_957788176_gb_LMYF01000004_1_Hypsibius_dujardini_scaffold4	1025803	1025937	135	hypothetical protein	- none -	1025803	1025937
fig|6666666.161614.peg.1628	CDS	gi_957788176_gb_LMYF01000004_1_Hypsibius_dujardini_scaffold4	1027857	1026058	1800	Excinuclease ABC subunit C	DNA repair, UvrABC system	1026058	1027857
fig|6666666.161614.peg.1629	CDS	gi_957788176_gb_LMYF01000004_1_Hypsibius_dujardini_scaffold4	1028438	1027854	585	hypothetical protein	- none -	1027854	1028438
fig|6666666.161614.peg.1630	CDS	gi_957788176_gb_LMYF01000004_1_Hypsibius_dujardini_scaffold4	1029983	1028535	1449	hypothetical protein	- none -	1028535	1029983
fig|6666666.161614.peg.1631	CDS	gi_957788176_gb_LMYF01000004_1_Hypsibius_dujardini_scaffold4	1030600	1030019	582	RNA polymerase ECF-type sigma factor	- none -	1030019	1030600
fig|6666666.161614.peg.1632	CDS	gi_957788176_gb_LMYF01000004_1_Hypsibius_dujardini_scaffold4	1030741	1030625	117	hypothetical protein	- none -	1030625	1030741
fig|6666666.161614.peg.1633	CDS	gi_957788176_gb_LMYF01000004_1_Hypsibius_dujardini_scaffold4	1032984	1030762	2223	TonB-dependent receptor	Ton and Tol transport systems	1030762	1032984
fig|6666666.161614.peg.1634	CDS	gi_957788176_gb_LMYF01000004_1_Hypsibius_dujardini_scaffold4	1033539	1033033	507	hypothetical protein	- none -	1033033	1033539
fig|6666666.161614.peg.1635	CDS	gi_957788176_gb_LMYF01000004_1_Hypsibius_dujardini_scaffold4	1034053	1033568	486	hypothetical protein	- none -	1033568	1034053
fig|6666666.161614.peg.1636	CDS	gi_957788176_gb_LMYF01000004_1_Hypsibius_dujardini_scaffold4	1035578	1034076	1503	2,3-bisphosphoglycerate-independent phosphoglycerate mutase (EC 5.4.2.1)	Entner-Doudoroff Pathway, Glycolysis and Gluconeogenesis, Phosphoglycerate mutase protein family	1034076	1035578
fig|6666666.161614.peg.1637	CDS	gi_957788176_gb_LMYF01000004_1_Hypsibius_dujardini_scaffold4	1035804	1036193	390	hypothetical protein	- none -	1035804	1036193
fig|6666666.161614.peg.1638	CDS	gi_957788176_gb_LMYF01000004_1_Hypsibius_dujardini_scaffold4	1036260	1037120	861	Quinolinate phosphoribosyltransferase [decarboxylating] (EC 2.4.2.19)	Mycobacterium virulence operon possibly involved in quinolinate biosynthesis, NAD and NADP cofactor biosynthesis global	1036260	1037120
fig|6666666.161614.peg.1639	CDS	gi_957788176_gb_LMYF01000004_1_Hypsibius_dujardini_scaffold4	1037134	1037475	342	Translation initiation factor SUI1-related protein	Translation initiation factors bacterial	1037134	1037475
fig|6666666.161614.peg.1640	CDS	gi_957788176_gb_LMYF01000004_1_Hypsibius_dujardini_scaffold4	1037447	1037710	264	hypothetical protein	- none -	1037447	1037710
fig|6666666.161614.peg.1641	CDS	gi_957788176_gb_LMYF01000004_1_Hypsibius_dujardini_scaffold4	1038155	1037715	441	hypothetical protein	- none -	1037715	1038155
fig|6666666.161614.peg.1642	CDS	gi_957788176_gb_LMYF01000004_1_Hypsibius_dujardini_scaffold4	1038291	1040024	1734	hypothetical protein	- none -	1038291	1040024
fig|6666666.161614.peg.1643	CDS	gi_957788176_gb_LMYF01000004_1_Hypsibius_dujardini_scaffold4	1041534	1040083	1452	Isocitrate dehydrogenase [NAD] (EC 1.1.1.41)	TCA Cycle	1040083	1041534
fig|6666666.161614.peg.1644	CDS	gi_957788176_gb_LMYF01000004_1_Hypsibius_dujardini_scaffold4	1041697	1042083	387	ApaG protein	- none -	1041697	1042083
fig|6666666.161614.peg.1645	CDS	gi_957788176_gb_LMYF01000004_1_Hypsibius_dujardini_scaffold4	1043131	1042094	1038	GldB	- none -	1042094	1043131
fig|6666666.161614.peg.1646	CDS	gi_957788176_gb_LMYF01000004_1_Hypsibius_dujardini_scaffold4	1043204	1044907	1704	NAD synthetase (EC 6.3.1.5) / Glutamine amidotransferase chain of NAD synthetase	NAD and NADP cofactor biosynthesis global, NAD and NADP cofactor biosynthesis global	1043204	1044907
fig|6666666.161614.peg.1647	CDS	gi_957788176_gb_LMYF01000004_1_Hypsibius_dujardini_scaffold4	1045446	1044973	474	hypothetical protein	- none -	1044973	1045446
fig|6666666.161614.peg.1648	CDS	gi_957788176_gb_LMYF01000004_1_Hypsibius_dujardini_scaffold4	1045569	1046570	1002	MoxR-like ATPase in aerotolerance operon	Aerotolerance operon in Bacteroides and potentially orthologous operons in other organisms	1045569	1046570
fig|6666666.161614.peg.1649	CDS	gi_957788176_gb_LMYF01000004_1_Hypsibius_dujardini_scaffold4	1046574	1047446	873	hypothetical protein PA3071	Aerotolerance operon in Bacteroides and potentially orthologous operons in other organisms	1046574	1047446
fig|6666666.161614.peg.1650	CDS	gi_957788176_gb_LMYF01000004_1_Hypsibius_dujardini_scaffold4	1047462	1048373	912	hypothetical protein	- none -	1047462	1048373
fig|6666666.161614.peg.1651	CDS	gi_957788176_gb_LMYF01000004_1_Hypsibius_dujardini_scaffold4	1048403	1049392	990	BatA (Bacteroides aerotolerance operon)	Aerotolerance operon in Bacteroides and potentially orthologous operons in other organisms	1048403	1049392
fig|6666666.161614.peg.1652	CDS	gi_957788176_gb_LMYF01000004_1_Hypsibius_dujardini_scaffold4	1049419	1050345	927	Ribosome small subunit-stimulated GTPase EngC	- none -	1049419	1050345
fig|6666666.161614.peg.1653	CDS	gi_957788176_gb_LMYF01000004_1_Hypsibius_dujardini_scaffold4	1050677	1050348	330	hypothetical protein	- none -	1050348	1050677
fig|6666666.161614.peg.1654	CDS	gi_957788176_gb_LMYF01000004_1_Hypsibius_dujardini_scaffold4	1050938	1050744	195	hypothetical protein	- none -	1050744	1050938
fig|6666666.161614.peg.1655	CDS	gi_957788176_gb_LMYF01000004_1_Hypsibius_dujardini_scaffold4	1051592	1051068	525	carbonic anhydrase, family 3	- none -	1051068	1051592
fig|6666666.161614.peg.1656	CDS	gi_957788176_gb_LMYF01000004_1_Hypsibius_dujardini_scaffold4	1051675	1052853	1179	Acetylornithine aminotransferase (EC 2.6.1.11) (ACOAT)	- none -	1051675	1052853
fig|6666666.161614.peg.1657	CDS	gi_957788176_gb_LMYF01000004_1_Hypsibius_dujardini_scaffold4	1054642	1053917	726	Glycerol uptake facilitator protein	Glycerol and Glycerol-3-phosphate Uptake and Utilization, Glycerol fermentation to 1,3-propanediol, Osmoregulation	1053917	1054642
fig|6666666.161614.peg.1658	CDS	gi_957788176_gb_LMYF01000004_1_Hypsibius_dujardini_scaffold4	1056123	1054660	1464	Glycerol-3-phosphate dehydrogenase (EC 1.1.5.3)	Glycerol and Glycerol-3-phosphate Uptake and Utilization, Glycerolipid and Glycerophospholipid Metabolism in Bacteria, Respiratory dehydrogenases 1	1054660	1056123
fig|6666666.161614.peg.1659	CDS	gi_957788176_gb_LMYF01000004_1_Hypsibius_dujardini_scaffold4	1057720	1056224	1497	Glycerol kinase (EC 2.7.1.30)	Glycerol and Glycerol-3-phosphate Uptake and Utilization, Glycerolipid and Glycerophospholipid Metabolism in Bacteria	1056224	1057720
fig|6666666.161614.peg.1660	CDS	gi_957788176_gb_LMYF01000004_1_Hypsibius_dujardini_scaffold4	1060331	1057845	2487	hypothetical protein	- none -	1057845	1060331
fig|6666666.161614.peg.1661	CDS	gi_957788176_gb_LMYF01000004_1_Hypsibius_dujardini_scaffold4	1060471	1060331	141	hypothetical protein	- none -	1060331	1060471
fig|6666666.161614.peg.1662	CDS	gi_957788176_gb_LMYF01000004_1_Hypsibius_dujardini_scaffold4	1060460	1061110	651	hypothetical protein	- none -	1060460	1061110
fig|6666666.161614.peg.1663	CDS	gi_957788176_gb_LMYF01000004_1_Hypsibius_dujardini_scaffold4	1061128	1061427	300	Bsl7504 protein	- none -	1061128	1061427
fig|6666666.161614.peg.1664	CDS	gi_957788176_gb_LMYF01000004_1_Hypsibius_dujardini_scaffold4	1061453	1061956	504	hypothetical protein	- none -	1061453	1061956
fig|6666666.161614.peg.1665	CDS	gi_957788176_gb_LMYF01000004_1_Hypsibius_dujardini_scaffold4	1061953	1062390	438	hypothetical protein	- none -	1061953	1062390
fig|6666666.161614.peg.1666	CDS	gi_957788176_gb_LMYF01000004_1_Hypsibius_dujardini_scaffold4	1062394	1063695	1302	Inner membrane protein CreD-like protein	Tolerance to colicin E2	1062394	1063695
fig|6666666.161614.peg.1667	CDS	gi_957788176_gb_LMYF01000004_1_Hypsibius_dujardini_scaffold4	1063689	1064465	777	putative membrane protein	- none -	1063689	1064465
fig|6666666.161614.peg.1668	CDS	gi_957788176_gb_LMYF01000004_1_Hypsibius_dujardini_scaffold4	1064486	1064833	348	Diacylglycerol kinase (EC 2.7.1.107)	Glycerolipid and Glycerophospholipid Metabolism in Bacteria, Riboflavin synthesis cluster	1064486	1064833
fig|6666666.161614.peg.1669	CDS	gi_957788176_gb_LMYF01000004_1_Hypsibius_dujardini_scaffold4	1064835	1065521	687	membrane protein, putative	- none -	1064835	1065521
fig|6666666.161614.peg.1670	CDS	gi_957788176_gb_LMYF01000004_1_Hypsibius_dujardini_scaffold4	1068953	1065618	3336	tolB protein precursor, periplasmic protein involved in the tonb-independent uptake of group A colicins	Ton and Tol transport systems	1065618	1068953
fig|6666666.161614.peg.1671	CDS	gi_957788176_gb_LMYF01000004_1_Hypsibius_dujardini_scaffold4	1069152	1069796	645	Hydroxyacylglutathione hydrolase (EC 3.1.2.6)	CBSS-228410.1.peg.134, CBSS-342610.3.peg.1536, Glutathione: Non-redox reactions, Methylglyoxal Metabolism	1069152	1069796
fig|6666666.161614.peg.1672	CDS	gi_957788176_gb_LMYF01000004_1_Hypsibius_dujardini_scaffold4	1069930	1070256	327	hypothetical protein	- none -	1069930	1070256
fig|6666666.161614.peg.1673	CDS	gi_957788176_gb_LMYF01000004_1_Hypsibius_dujardini_scaffold4	1071762	1070242	1521	Polysaccharide biosynthesis protein	- none -	1070242	1071762
fig|6666666.161614.peg.1674	CDS	gi_957788176_gb_LMYF01000004_1_Hypsibius_dujardini_scaffold4	1071918	1072547	630	hypothetical protein	- none -	1071918	1072547
fig|6666666.161614.peg.1675	CDS	gi_957788176_gb_LMYF01000004_1_Hypsibius_dujardini_scaffold4	1073541	1072549	993	Probable cytochrome-c peroxidase (EC 1.11.1.5)	- none -	1072549	1073541
fig|6666666.161614.peg.1676	CDS	gi_957788176_gb_LMYF01000004_1_Hypsibius_dujardini_scaffold4	1074074	1073670	405	Hypothetical protein YaeJ with similarity to translation release factor	Translation termination factors bacterial	1073670	1074074
fig|6666666.161614.peg.1677	CDS	gi_957788176_gb_LMYF01000004_1_Hypsibius_dujardini_scaffold4	1074124	1074576	453	D-tyrosyl-tRNA(Tyr) deacylase	CBSS-342610.3.peg.283, D-tyrosyl-tRNA(Tyr) deacylase	1074124	1074576
fig|6666666.161614.peg.1678	CDS	gi_957788176_gb_LMYF01000004_1_Hypsibius_dujardini_scaffold4	1074928	1074626	303	hypothetical protein	- none -	1074626	1074928
fig|6666666.161614.peg.1679	CDS	gi_957788176_gb_LMYF01000004_1_Hypsibius_dujardini_scaffold4	1075065	1075406	342	hypothetical protein	- none -	1075065	1075406
fig|6666666.161614.peg.1680	CDS	gi_957788176_gb_LMYF01000004_1_Hypsibius_dujardini_scaffold4	1075653	1076657	1005	Inner membrane protein YihY, formerly thought to be RNase BN	CBSS-342610.3.peg.283, LMPTP YfkJ cluster, Riboflavin synthesis cluster	1075653	1076657
fig|6666666.161614.peg.1681	CDS	gi_957788176_gb_LMYF01000004_1_Hypsibius_dujardini_scaffold4	1076710	1078179	1470	Glycyl-tRNA synthetase (EC 6.1.1.14)	Glycyl-tRNA synthetase containing cluster, tRNA aminoacylation, Gly	1076710	1078179
fig|6666666.161614.peg.1682	CDS	gi_957788176_gb_LMYF01000004_1_Hypsibius_dujardini_scaffold4	1078341	1081916	3576	Pyruvate-flavodoxin oxidoreductase (EC 1.2.7.-)	Methionine Degradation, Pyruvate:ferredoxin oxidoreductase	1078341	1081916
fig|6666666.161614.peg.1683	CDS	gi_957788176_gb_LMYF01000004_1_Hypsibius_dujardini_scaffold4	1081928	1082083	156	hypothetical protein	- none -	1081928	1082083
fig|6666666.161614.peg.1684	CDS	gi_957788176_gb_LMYF01000004_1_Hypsibius_dujardini_scaffold4	1082244	1082113	132	hypothetical protein	- none -	1082113	1082244
fig|6666666.161614.peg.1685	CDS	gi_957788176_gb_LMYF01000004_1_Hypsibius_dujardini_scaffold4	1082212	1082550	339	hypothetical protein	- none -	1082212	1082550
fig|6666666.161614.peg.1686	CDS	gi_957788176_gb_LMYF01000004_1_Hypsibius_dujardini_scaffold4	1082595	1084406	1812	hypothetical protein	- none -	1082595	1084406
fig|6666666.161614.peg.1687	CDS	gi_957788176_gb_LMYF01000004_1_Hypsibius_dujardini_scaffold4	1085798	1084410	1389	Tryptophanase (EC 4.1.99.1)	Aromatic amino acid degradation	1084410	1085798
fig|6666666.161614.peg.1688	CDS	gi_957788176_gb_LMYF01000004_1_Hypsibius_dujardini_scaffold4	1087229	1085805	1425	Tryptophanase (EC 4.1.99.1)	Aromatic amino acid degradation	1085805	1087229
fig|6666666.161614.peg.1689	CDS	gi_957788176_gb_LMYF01000004_1_Hypsibius_dujardini_scaffold4	1087861	1087415	447	hypothetical protein	- none -	1087415	1087861
fig|6666666.161614.peg.1690	CDS	gi_957788176_gb_LMYF01000004_1_Hypsibius_dujardini_scaffold4	1088934	1087915	1020	[NiFe] hydrogenase metallocenter assembly protein HypE	G3E family of P-loop GTPases (metallocenter biosynthesis), NiFe hydrogenase maturation	1087915	1088934
fig|6666666.161614.peg.1691	CDS	gi_957788176_gb_LMYF01000004_1_Hypsibius_dujardini_scaffold4	1090064	1088955	1110	[NiFe] hydrogenase metallocenter assembly protein HypD	G3E family of P-loop GTPases (metallocenter biosynthesis), NiFe hydrogenase maturation	1088955	1090064
fig|6666666.161614.peg.1692	CDS	gi_957788176_gb_LMYF01000004_1_Hypsibius_dujardini_scaffold4	1090324	1090061	264	[NiFe] hydrogenase metallocenter assembly protein HypC	G3E family of P-loop GTPases (metallocenter biosynthesis), NiFe hydrogenase maturation	1090061	1090324
fig|6666666.161614.peg.1693	CDS	gi_957788176_gb_LMYF01000004_1_Hypsibius_dujardini_scaffold4	1092653	1090335	2319	[NiFe] hydrogenase metallocenter assembly protein HypF	G3E family of P-loop GTPases (metallocenter biosynthesis), NiFe hydrogenase maturation	1090335	1092653
fig|6666666.161614.peg.1694	CDS	gi_957788176_gb_LMYF01000004_1_Hypsibius_dujardini_scaffold4	1093442	1092684	759	[NiFe] hydrogenase nickel incorporation-associated protein HypB	G3E family of P-loop GTPases (metallocenter biosynthesis), NiFe hydrogenase maturation	1092684	1093442
fig|6666666.161614.peg.1695	CDS	gi_957788176_gb_LMYF01000004_1_Hypsibius_dujardini_scaffold4	1093810	1093469	342	[NiFe] hydrogenase nickel incorporation protein HypA	G3E family of P-loop GTPases (metallocenter biosynthesis), NiFe hydrogenase maturation	1093469	1093810
fig|6666666.161614.peg.1696	CDS	gi_957788176_gb_LMYF01000004_1_Hypsibius_dujardini_scaffold4	1094005	1093814	192	hypothetical protein	- none -	1093814	1094005
fig|6666666.161614.peg.1697	CDS	gi_957788176_gb_LMYF01000004_1_Hypsibius_dujardini_scaffold4	1094187	1095314	1128	Uptake hydrogenase small subunit precursor (EC 1.12.99.6)	Hydrogenases	1094187	1095314
fig|6666666.161614.peg.1698	CDS	gi_957788176_gb_LMYF01000004_1_Hypsibius_dujardini_scaffold4	1095347	1097071	1725	Uptake hydrogenase large subunit (EC 1.12.99.6)	Hydrogenases	1095347	1097071
fig|6666666.161614.peg.1699	CDS	gi_957788176_gb_LMYF01000004_1_Hypsibius_dujardini_scaffold4	1097090	1097815	726	Ni,Fe-hydrogenase I cytochrome b subunit	Hydrogenases	1097090	1097815
fig|6666666.161614.peg.1700	CDS	gi_957788176_gb_LMYF01000004_1_Hypsibius_dujardini_scaffold4	1097799	1098305	507	Hydrogenase maturation protease (EC 3.4.24.-)	- none -	1097799	1098305
fig|6666666.161614.peg.1701	CDS	gi_957788176_gb_LMYF01000004_1_Hypsibius_dujardini_scaffold4	1098830	1098708	123	hypothetical protein	- none -	1098708	1098830
fig|6666666.161614.peg.1702	CDS	gi_957788176_gb_LMYF01000004_1_Hypsibius_dujardini_scaffold4	1100683	1099208	1476	hypothetical protein	- none -	1099208	1100683
fig|6666666.161614.peg.1703	CDS	gi_957788176_gb_LMYF01000004_1_Hypsibius_dujardini_scaffold4	1101495	1100845	651	hypothetical protein	- none -	1100845	1101495
fig|6666666.161614.peg.1704	CDS	gi_957788176_gb_LMYF01000004_1_Hypsibius_dujardini_scaffold4	1104403	1101644	2760	Pyruvate,phosphate dikinase (EC 2.7.9.1)	Glycolysis and Gluconeogenesis, Pyruvate metabolism I: anaplerotic reactions, PEP	1101644	1104403
fig|6666666.161614.peg.1705	CDS	gi_957788176_gb_LMYF01000004_1_Hypsibius_dujardini_scaffold4	1105027	1104641	387	hypothetical protein	- none -	1104641	1105027
fig|6666666.161614.peg.1706	CDS	gi_957788176_gb_LMYF01000004_1_Hypsibius_dujardini_scaffold4	1106485	1105088	1398	NADH-ubiquinone oxidoreductase chain N (EC 1.6.5.3)	NADH ubiquinone oxidoreductase, Respiratory Complex I	1105088	1106485
fig|6666666.161614.peg.1707	CDS	gi_957788176_gb_LMYF01000004_1_Hypsibius_dujardini_scaffold4	1107976	1106498	1479	NADH-ubiquinone oxidoreductase chain M (EC 1.6.5.3)	NADH ubiquinone oxidoreductase, Respiratory Complex I	1106498	1107976
fig|6666666.161614.peg.1708	CDS	gi_957788176_gb_LMYF01000004_1_Hypsibius_dujardini_scaffold4	1109933	1107999	1935	NADH-ubiquinone oxidoreductase chain L (EC 1.6.5.3)	NADH ubiquinone oxidoreductase, Respiratory Complex I	1107999	1109933
fig|6666666.161614.peg.1709	CDS	gi_957788176_gb_LMYF01000004_1_Hypsibius_dujardini_scaffold4	1110251	1109940	312	NADH-ubiquinone oxidoreductase chain K (EC 1.6.5.3)	NADH ubiquinone oxidoreductase, Respiratory Complex I	1109940	1110251
fig|6666666.161614.peg.1710	CDS	gi_957788176_gb_LMYF01000004_1_Hypsibius_dujardini_scaffold4	1110769	1110251	519	NADH-ubiquinone oxidoreductase chain J (EC 1.6.5.3)	NADH ubiquinone oxidoreductase, Respiratory Complex I	1110251	1110769
fig|6666666.161614.peg.1711	CDS	gi_957788176_gb_LMYF01000004_1_Hypsibius_dujardini_scaffold4	1111242	1110766	477	NADH-ubiquinone oxidoreductase chain I (EC 1.6.5.3)	NADH ubiquinone oxidoreductase, Respiratory Complex I	1110766	1111242
fig|6666666.161614.peg.1712	CDS	gi_957788176_gb_LMYF01000004_1_Hypsibius_dujardini_scaffold4	1111352	1111233	120	hypothetical protein	- none -	1111233	1111352
fig|6666666.161614.peg.1713	CDS	gi_957788176_gb_LMYF01000004_1_Hypsibius_dujardini_scaffold4	1112416	1111340	1077	NADH-ubiquinone oxidoreductase chain H (EC 1.6.5.3)	NADH ubiquinone oxidoreductase, Respiratory Complex I	1111340	1112416
fig|6666666.161614.peg.1714	CDS	gi_957788176_gb_LMYF01000004_1_Hypsibius_dujardini_scaffold4	1112552	1112433	120	hypothetical protein	- none -	1112433	1112552
fig|6666666.161614.peg.1715	CDS	gi_957788176_gb_LMYF01000004_1_Hypsibius_dujardini_scaffold4	1113718	1112603	1116	NADH-ubiquinone oxidoreductase chain D (EC 1.6.5.3)	NADH ubiquinone oxidoreductase, Respiratory Complex I	1112603	1113718
fig|6666666.161614.peg.1716	CDS	gi_957788176_gb_LMYF01000004_1_Hypsibius_dujardini_scaffold4	1114178	1113720	459	NADH-ubiquinone oxidoreductase chain C (EC 1.6.5.3)	NADH ubiquinone oxidoreductase, Respiratory Complex I	1113720	1114178
fig|6666666.161614.peg.1717	CDS	gi_957788176_gb_LMYF01000004_1_Hypsibius_dujardini_scaffold4	1114717	1114181	537	NADH-ubiquinone oxidoreductase chain B (EC 1.6.5.3)	NADH ubiquinone oxidoreductase, Respiratory Complex I	1114181	1114717
fig|6666666.161614.peg.1718	CDS	gi_957788176_gb_LMYF01000004_1_Hypsibius_dujardini_scaffold4	1115078	1114728	351	NADH ubiquinone oxidoreductase chain A (EC 1.6.5.3)	NADH ubiquinone oxidoreductase, Respiratory Complex I	1114728	1115078
fig|6666666.161614.peg.1719	CDS	gi_957788176_gb_LMYF01000004_1_Hypsibius_dujardini_scaffold4	1115911	1115192	720	oxidoreductase FAD/NAD(P)-binding	- none -	1115192	1115911
fig|6666666.161614.peg.1720	CDS	gi_957788176_gb_LMYF01000004_1_Hypsibius_dujardini_scaffold4	1116679	1116185	495	hypothetical protein	- none -	1116185	1116679
fig|6666666.161614.peg.1721	CDS	gi_957788176_gb_LMYF01000004_1_Hypsibius_dujardini_scaffold4	1116795	1119410	2616	hypothetical protein	- none -	1116795	1119410
fig|6666666.161614.peg.1722	CDS	gi_957788176_gb_LMYF01000004_1_Hypsibius_dujardini_scaffold4	1119478	1122924	3447	Transcription-repair coupling factor	Cell division-ribosomal stress proteins cluster, Transcription factors bacterial	1119478	1122924
fig|6666666.161614.peg.1723	CDS	gi_957788176_gb_LMYF01000004_1_Hypsibius_dujardini_scaffold4	1123010	1128430	5421	hypothetical protein	- none -	1123010	1128430
fig|6666666.161614.peg.1724	CDS	gi_957788176_gb_LMYF01000004_1_Hypsibius_dujardini_scaffold4	1128686	1128483	204	hypothetical protein	- none -	1128483	1128686
fig|6666666.161614.peg.1725	CDS	gi_957788176_gb_LMYF01000004_1_Hypsibius_dujardini_scaffold4	1130798	1128819	1980	DNA gyrase subunit B (EC 5.99.1.3)	Cell Division Subsystem including YidCD, DNA gyrase subunits, DNA replication cluster 1, DNA topoisomerases, Type II, ATP-dependent, Resistance to fluoroquinolones	1128819	1130798
fig|6666666.161614.peg.1726	CDS	gi_957788176_gb_LMYF01000004_1_Hypsibius_dujardini_scaffold4	1132430	1130991	1440	N-acetylglucosamine deacetylase (EC 3.5.1.-) / (3R)-hydroxymyristoyl-[acyl carrier protein] dehydratase (EC 4.2.1.-)	- none -	1130991	1132430
fig|6666666.161614.peg.1727	CDS	gi_957788176_gb_LMYF01000004_1_Hypsibius_dujardini_scaffold4	1132544	1132675	132	hypothetical protein	- none -	1132544	1132675
fig|6666666.161614.peg.1728	CDS	gi_957788176_gb_LMYF01000004_1_Hypsibius_dujardini_scaffold4	1132689	1133189	501	hypothetical protein	- none -	1132689	1133189
fig|6666666.161614.peg.1729	CDS	gi_957788176_gb_LMYF01000004_1_Hypsibius_dujardini_scaffold4	1134282	1133239	1044	UDP-3-O-[3-hydroxymyristoyl] glucosamine N-acyltransferase (EC 2.3.1.-)	KDO2-Lipid A biosynthesis	1133239	1134282
fig|6666666.161614.peg.1730	CDS	gi_957788176_gb_LMYF01000004_1_Hypsibius_dujardini_scaffold4	1135512	1134298	1215	Deoxyguanosinetriphosphate triphosphohydrolase (EC 3.1.5.1)	- none -	1134298	1135512
fig|6666666.161614.peg.1731	CDS	gi_957788176_gb_LMYF01000004_1_Hypsibius_dujardini_scaffold4	1135660	1137216	1557	Response regulator	- none -	1135660	1137216
fig|6666666.161614.peg.1732	CDS	gi_957788176_gb_LMYF01000004_1_Hypsibius_dujardini_scaffold4	1137348	1137632	285	hypothetical protein	- none -	1137348	1137632
fig|6666666.161614.peg.1733	CDS	gi_957788176_gb_LMYF01000004_1_Hypsibius_dujardini_scaffold4	1137701	1138477	777	Metal-dependent hydrolases of the beta-lactamase superfamily I; PhnP protein	Beta-lactamase	1137701	1138477
fig|6666666.161614.peg.1734	CDS	gi_957788176_gb_LMYF01000004_1_Hypsibius_dujardini_scaffold4	1138638	1139780	1143	Acyl-CoA dehydrogenase, short-chain specific (EC 1.3.99.2)	Isoleucine degradation	1138638	1139780
fig|6666666.161614.peg.1735	CDS	gi_957788176_gb_LMYF01000004_1_Hypsibius_dujardini_scaffold4	1139939	1140601	663	hypothetical protein	- none -	1139939	1140601
fig|6666666.161614.peg.1736	CDS	gi_957788176_gb_LMYF01000004_1_Hypsibius_dujardini_scaffold4	1140635	1141294	660	hypothetical protein	- none -	1140635	1141294
fig|6666666.161614.peg.1737	CDS	gi_957788176_gb_LMYF01000004_1_Hypsibius_dujardini_scaffold4	1141276	1142067	792	Sensor histidine kinase	- none -	1141276	1142067
fig|6666666.161614.peg.1738	CDS	gi_957788176_gb_LMYF01000004_1_Hypsibius_dujardini_scaffold4	1142074	1142721	648	Two-component response regulator yhcZ	- none -	1142074	1142721
fig|6666666.161614.peg.1739	CDS	gi_957788176_gb_LMYF01000004_1_Hypsibius_dujardini_scaffold4	1142752	1143210	459	Molybdopterin oxidoreductase subunit, predicted; chaperone protein HtpG	CBSS-269799.3.peg.2220	1142752	1143210
fig|6666666.161614.peg.1740	CDS	gi_957788176_gb_LMYF01000004_1_Hypsibius_dujardini_scaffold4	1145020	1143212	1809	Lipid A export ATP-binding/permease protein MsbA (EC 3.6.3.25)	KDO2-Lipid A biosynthesis	1143212	1145020
fig|6666666.161614.peg.1741	CDS	gi_957788176_gb_LMYF01000004_1_Hypsibius_dujardini_scaffold4	1145087	1145458	372	Ribosome-binding factor A	CBSS-138119.3.peg.2719, NusA-TFII Cluster, Translation initiation factors bacterial	1145087	1145458
fig|6666666.161614.peg.1742	CDS	gi_957788176_gb_LMYF01000004_1_Hypsibius_dujardini_scaffold4	1145513	1146769	1257	Lipoprotein releasing system transmembrane protein LolC	Lipoprotein sorting system	1145513	1146769
fig|6666666.161614.peg.1743	CDS	gi_957788176_gb_LMYF01000004_1_Hypsibius_dujardini_scaffold4	1147674	1146838	837	Transketolase, N-terminal section (EC 2.2.1.1)	Pentose phosphate pathway	1146838	1147674
fig|6666666.161614.peg.1744	CDS	gi_957788176_gb_LMYF01000004_1_Hypsibius_dujardini_scaffold4	1147907	1149043	1137	Undecaprenyl-phosphate N-acetylglucosaminyl 1-phosphate transferase (EC 2.7.8.-)	- none -	1147907	1149043
fig|6666666.161614.peg.1745	CDS	gi_957788176_gb_LMYF01000004_1_Hypsibius_dujardini_scaffold4	1149171	1149734	564	Ribosome recycling factor	Ribosome recycling related cluster, Translation termination factors bacterial	1149171	1149734
fig|6666666.161614.peg.1746	CDS	gi_957788176_gb_LMYF01000004_1_Hypsibius_dujardini_scaffold4	1150672	1149740	933	Permease of the drug/metabolite transporter (DMT) superfamily	Queuosine-Archaeosine Biosynthesis	1149740	1150672
fig|6666666.161614.peg.1747	CDS	gi_957788176_gb_LMYF01000004_1_Hypsibius_dujardini_scaffold4	1150753	1151499	747	hypothetical protein	- none -	1150753	1151499
fig|6666666.161614.peg.1748	CDS	gi_957788176_gb_LMYF01000004_1_Hypsibius_dujardini_scaffold4	1151608	1151979	372	Large-conductance mechanosensitive channel	Potassium homeostasis	1151608	1151979
fig|6666666.161614.peg.1749	CDS	gi_957788176_gb_LMYF01000004_1_Hypsibius_dujardini_scaffold4	1152089	1152877	789	Segregation and condensation protein A	CBSS-314276.3.peg.1499	1152089	1152877
fig|6666666.161614.peg.1750	CDS	gi_957788176_gb_LMYF01000004_1_Hypsibius_dujardini_scaffold4	1152900	1153310	411	Osmotically inducible protein C	- none -	1152900	1153310
fig|6666666.161614.peg.1751	CDS	gi_957788176_gb_LMYF01000004_1_Hypsibius_dujardini_scaffold4	1154022	1153375	648	hypothetical protein	- none -	1153375	1154022
fig|6666666.161614.peg.1752	CDS	gi_957788176_gb_LMYF01000004_1_Hypsibius_dujardini_scaffold4	1156059	1154122	1938	1-deoxy-D-xylulose 5-phosphate synthase (EC 2.2.1.7)	Isoprenoid Biosynthesis, Nonmevalonate Branch of Isoprenoid Biosynthesis, Pyridoxin (Vitamin B6) Biosynthesis, Thiamin biosynthesis	1154122	1156059
fig|6666666.161614.peg.1753	CDS	gi_957788176_gb_LMYF01000004_1_Hypsibius_dujardini_scaffold4	1156291	1157343	1053	Autolysin sensor kinase (EC 2.7.3.-)	- none -	1156291	1157343
fig|6666666.161614.peg.1754	CDS	gi_957788176_gb_LMYF01000004_1_Hypsibius_dujardini_scaffold4	1157354	1158082	729	two-component system, regulatory protein	- none -	1157354	1158082
fig|6666666.161614.peg.1755	CDS	gi_957788176_gb_LMYF01000004_1_Hypsibius_dujardini_scaffold4	1158114	1159397	1284	putative peptidase, M28 family protein	- none -	1158114	1159397
fig|6666666.161614.peg.1756	CDS	gi_957788176_gb_LMYF01000004_1_Hypsibius_dujardini_scaffold4	1159953	1159402	552	hypothetical protein	- none -	1159402	1159953
fig|6666666.161614.peg.1757	CDS	gi_957788176_gb_LMYF01000004_1_Hypsibius_dujardini_scaffold4	1161644	1160079	1566	Phosphoenolpyruvate carboxykinase [ATP] (EC 4.1.1.49)	Pyruvate metabolism I: anaplerotic reactions, PEP, Serine-glyoxylate cycle	1160079	1161644
fig|6666666.161614.peg.1758	CDS	gi_957788176_gb_LMYF01000004_1_Hypsibius_dujardini_scaffold4	1161863	1161720	144	hypothetical protein	- none -	1161720	1161863
fig|6666666.161614.peg.1759	CDS	gi_957788176_gb_LMYF01000004_1_Hypsibius_dujardini_scaffold4	1161952	1163244	1293	Xaa-Pro aminopeptidase (EC 3.4.11.9)	Aminopeptidases (EC 3.4.11.-)	1161952	1163244
fig|6666666.161614.peg.1760	CDS	gi_957788176_gb_LMYF01000004_1_Hypsibius_dujardini_scaffold4	1163327	1163641	315	23Sr RNA gene	- none -	1163327	1163641
fig|6666666.161614.peg.1761	CDS	gi_957788176_gb_LMYF01000004_1_Hypsibius_dujardini_scaffold4	1163677	1164462	786	CDP-diacylglycerol--serine O-phosphatidyltransferase (EC 2.7.8.8)	Glycerolipid and Glycerophospholipid Metabolism in Bacteria	1163677	1164462
fig|6666666.161614.peg.1762	CDS	gi_957788176_gb_LMYF01000004_1_Hypsibius_dujardini_scaffold4	1164486	1164704	219	Phosphoribosylformylglycinamidine synthase, PurS subunit (EC 6.3.5.3)	De Novo Purine Biosynthesis	1164486	1164704
fig|6666666.161614.peg.1763	CDS	gi_957788176_gb_LMYF01000004_1_Hypsibius_dujardini_scaffold4	1164771	1165439	669	rRNA small subunit methyltransferase I	16S rRNA modification within P site of ribosome, Heat shock dnaK gene cluster extended	1164771	1165439
fig|6666666.161614.peg.1764	CDS	gi_957788176_gb_LMYF01000004_1_Hypsibius_dujardini_scaffold4	1165505	1165954	450	Putative lipoprotein	- none -	1165505	1165954
fig|6666666.161614.peg.1765	CDS	gi_957788176_gb_LMYF01000004_1_Hypsibius_dujardini_scaffold4	1166072	1165959	114	hypothetical protein	- none -	1165959	1166072
fig|6666666.161614.peg.1766	CDS	gi_957788176_gb_LMYF01000004_1_Hypsibius_dujardini_scaffold4	1166045	1167232	1188	aminopeptidase	- none -	1166045	1167232
fig|6666666.161614.peg.1767	CDS	gi_957788176_gb_LMYF01000004_1_Hypsibius_dujardini_scaffold4	1167286	1169175	1890	Zn-dependent aminopeptidase	- none -	1167286	1169175
fig|6666666.161614.peg.1768	CDS	gi_957788176_gb_LMYF01000004_1_Hypsibius_dujardini_scaffold4	1170057	1169416	642	hypothetical protein	- none -	1169416	1170057
fig|6666666.161614.peg.1769	CDS	gi_957788176_gb_LMYF01000004_1_Hypsibius_dujardini_scaffold4	1170734	1170111	624	rRNA small subunit 7-methylguanosine (m7G) methyltransferase GidB	Cell Division Subsystem including YidCD, RNA methylation, RNA modification and chromosome partitioning cluster	1170111	1170734
fig|6666666.161614.peg.1770	CDS	gi_957788176_gb_LMYF01000004_1_Hypsibius_dujardini_scaffold4	1171879	1170761	1119	N-acetylglucosaminyltransferase (EC 2.4.1.-)	- none -	1170761	1171879
fig|6666666.161614.peg.1771	CDS	gi_957788176_gb_LMYF01000004_1_Hypsibius_dujardini_scaffold4	1171906	1173108	1203	tRNA-guanine transglycosylase (EC 2.4.2.29)	CBSS-211586.1.peg.2832, Queuosine-Archaeosine Biosynthesis	1171906	1173108
fig|6666666.161614.peg.1772	CDS	gi_957788176_gb_LMYF01000004_1_Hypsibius_dujardini_scaffold4	1173301	1173888	588	hypothetical protein	- none -	1173301	1173888
fig|6666666.161614.peg.1773	CDS	gi_957788176_gb_LMYF01000004_1_Hypsibius_dujardini_scaffold4	1173894	1174163	270	hypothetical protein	- none -	1173894	1174163
fig|6666666.161614.peg.1774	CDS	gi_957788176_gb_LMYF01000004_1_Hypsibius_dujardini_scaffold4	1174221	1175315	1095	membrane protein, putative	- none -	1174221	1175315
fig|6666666.161614.peg.1775	CDS	gi_957788176_gb_LMYF01000004_1_Hypsibius_dujardini_scaffold4	1175420	1175292	129	hypothetical protein	- none -	1175292	1175420
fig|6666666.161614.peg.1776	CDS	gi_957788176_gb_LMYF01000004_1_Hypsibius_dujardini_scaffold4	1175469	1176794	1326	Citrate synthase (si) (EC 2.3.3.1)	Serine-glyoxylate cycle, TCA Cycle	1175469	1176794
fig|6666666.161614.peg.1777	CDS	gi_957788176_gb_LMYF01000004_1_Hypsibius_dujardini_scaffold4	1177116	1176922	195	hypothetical protein	- none -	1176922	1177116
fig|6666666.161614.peg.1778	CDS	gi_957788176_gb_LMYF01000004_1_Hypsibius_dujardini_scaffold4	1178424	1177132	1293	hypothetical protein	- none -	1177132	1178424
fig|6666666.161614.peg.1779	CDS	gi_957788176_gb_LMYF01000004_1_Hypsibius_dujardini_scaffold4	1179162	1178653	510	hypothetical protein	- none -	1178653	1179162
fig|6666666.161614.peg.1780	CDS	gi_957788176_gb_LMYF01000004_1_Hypsibius_dujardini_scaffold4	1179602	1181167	1566	Replicative DNA helicase (EC 3.6.1.-)	- none -	1179602	1181167
fig|6666666.161614.peg.1781	CDS	gi_957788176_gb_LMYF01000004_1_Hypsibius_dujardini_scaffold4	1181200	1181940	741	Ribosomal RNA small subunit methyltransferase E (EC 2.1.1.-)	Cluster containing Glutathione synthetase, Heat shock dnaK gene cluster extended, RNA methylation	1181200	1181940
fig|6666666.161614.peg.1782	CDS	gi_957788176_gb_LMYF01000004_1_Hypsibius_dujardini_scaffold4	1182726	1181920	807	Integral membrane protein TerC	- none -	1181920	1182726
fig|6666666.161614.peg.1783	CDS	gi_957788176_gb_LMYF01000004_1_Hypsibius_dujardini_scaffold4	1183815	1182739	1077	Dihydroorotate dehydrogenase (EC 1.3.3.1)	De Novo Pyrimidine Synthesis	1182739	1183815
fig|6666666.161614.peg.1784	CDS	gi_957788176_gb_LMYF01000004_1_Hypsibius_dujardini_scaffold4	1183964	1185142	1179	3-ketoacyl-CoA thiolase (EC 2.3.1.16) @ Acetyl-CoA acetyltransferase (EC 2.3.1.9)	Acetyl-CoA fermentation to Butyrate, Biotin biosynthesis, Biotin synthesis cluster, Butanol Biosynthesis, Butyrate metabolism cluster, Fatty acid metabolism cluster, Isoleucine degradation, Isoprenoid Biosynthesis, Polyhydroxybutyrate metabolism, Polyhydroxybutyrate metabolism, Serine-glyoxylate cycle, Serine-glyoxylate cycle	1183964	1185142
fig|6666666.161614.peg.1785	CDS	gi_957788176_gb_LMYF01000004_1_Hypsibius_dujardini_scaffold4	1189615	1185230	4386	hypothetical protein	- none -	1185230	1189615
fig|6666666.161614.peg.1786	CDS	gi_957788176_gb_LMYF01000004_1_Hypsibius_dujardini_scaffold4	1190742	1189738	1005	Esterase/lipase	- none -	1189738	1190742
fig|6666666.161614.peg.1787	CDS	gi_957788176_gb_LMYF01000004_1_Hypsibius_dujardini_scaffold4	1191428	1190805	624	hypothetical protein	- none -	1190805	1191428
fig|6666666.161614.peg.1788	CDS	gi_957788176_gb_LMYF01000004_1_Hypsibius_dujardini_scaffold4	1191692	1191468	225	hypothetical protein	- none -	1191468	1191692
fig|6666666.161614.peg.1789	CDS	gi_957788176_gb_LMYF01000004_1_Hypsibius_dujardini_scaffold4	1192643	1191786	858	Transcriptional regulator, AraC family	- none -	1191786	1192643
fig|6666666.161614.peg.1790	CDS	gi_957788176_gb_LMYF01000004_1_Hypsibius_dujardini_scaffold4	1193101	1192724	378	Glyoxalase/Bleomycin resistance protein/Dioxygenase family protein	- none -	1192724	1193101
fig|6666666.161614.peg.1791	CDS	gi_957788176_gb_LMYF01000004_1_Hypsibius_dujardini_scaffold4	1193750	1193361	390	Glyoxalase family protein	- none -	1193361	1193750
fig|6666666.161614.peg.1792	CDS	gi_957788176_gb_LMYF01000004_1_Hypsibius_dujardini_scaffold4	1193910	1193794	117	hypothetical protein	- none -	1193794	1193910
fig|6666666.161614.peg.1793	CDS	gi_957788176_gb_LMYF01000004_1_Hypsibius_dujardini_scaffold4	1194407	1193973	435	hypothetical protein	- none -	1193973	1194407
fig|6666666.161614.peg.1794	CDS	gi_957788176_gb_LMYF01000004_1_Hypsibius_dujardini_scaffold4	1195272	1194457	816	Esterase ybfF (EC 3.1.-.-)	- none -	1194457	1195272
fig|6666666.161614.peg.1795	CDS	gi_957788176_gb_LMYF01000004_1_Hypsibius_dujardini_scaffold4	1195810	1195385	426	PhnB protein; putative DNA binding 3-demethylubiquinone-9 3-methyltransferase domain protein	Alkylphosphonate utilization	1195385	1195810
fig|6666666.161614.peg.1796	CDS	gi_957788176_gb_LMYF01000004_1_Hypsibius_dujardini_scaffold4	1196377	1195880	498	Probable glutathione S-transferase-related transmembrane protein (EC 2.5.1.18)	- none -	1195880	1196377
fig|6666666.161614.peg.1797	CDS	gi_957788176_gb_LMYF01000004_1_Hypsibius_dujardini_scaffold4	1196694	1196374	321	Transcriptional regulator, ArsR family	- none -	1196374	1196694
fig|6666666.161614.peg.1798	CDS	gi_957788176_gb_LMYF01000004_1_Hypsibius_dujardini_scaffold4	1196739	1196891	153	hypothetical protein	- none -	1196739	1196891
fig|6666666.161614.peg.1799	CDS	gi_957788176_gb_LMYF01000004_1_Hypsibius_dujardini_scaffold4	1197467	1196895	573	Dihydrofolate reductase (EC 1.5.1.3)	5-FCL-like protein, Folate Biosynthesis	1196895	1197467
fig|6666666.161614.peg.1800	CDS	gi_957788176_gb_LMYF01000004_1_Hypsibius_dujardini_scaffold4	1199197	1197707	1491	hypothetical protein	- none -	1197707	1199197
fig|6666666.161614.peg.1801	CDS	gi_957788176_gb_LMYF01000004_1_Hypsibius_dujardini_scaffold4	1199598	1200623	1026	FOG: TPR repeat	- none -	1199598	1200623
fig|6666666.161614.peg.1802	CDS	gi_957788176_gb_LMYF01000004_1_Hypsibius_dujardini_scaffold4	1200660	1201544	885	MORN repeat protein	- none -	1200660	1201544
fig|6666666.161614.peg.1803	CDS	gi_957788176_gb_LMYF01000004_1_Hypsibius_dujardini_scaffold4	1201575	1202813	1239	hypothetical protein	- none -	1201575	1202813
fig|6666666.161614.peg.1804	CDS	gi_957788176_gb_LMYF01000004_1_Hypsibius_dujardini_scaffold4	1203563	1203450	114	hypothetical protein	- none -	1203450	1203563
fig|6666666.161614.peg.1805	CDS	gi_957788178_gb_LMYF01000002_1_Hypsibius_dujardini_scaffold2	1509	721	789	Diaminopimelate epimerase (EC 5.1.1.7)	CBSS-84588.1.peg.1247, Lysine Biosynthesis DAP Pathway, GJO scratch	721	1509
fig|6666666.161614.peg.1806	CDS	gi_957788178_gb_LMYF01000002_1_Hypsibius_dujardini_scaffold2	2387	1509	879	Purine nucleoside phosphorylase (EC 2.4.2.1)	Adenosyl nucleosidases, Deoxyribose and Deoxynucleoside Catabolism, Purine conversions, pyrimidine conversions	1509	2387
fig|6666666.161614.rna.27	RNA	gi_957788178_gb_LMYF01000002_1_Hypsibius_dujardini_scaffold2	2460	2530	71	tRNA-Cys-GCA	tRNAs	2460	2530
fig|6666666.161614.peg.1807	CDS	gi_957788178_gb_LMYF01000002_1_Hypsibius_dujardini_scaffold2	2700	2813	114	hypothetical protein	- none -	2700	2813
fig|6666666.161614.peg.1808	CDS	gi_957788178_gb_LMYF01000002_1_Hypsibius_dujardini_scaffold2	2813	3076	264	hypothetical protein	- none -	2813	3076
fig|6666666.161614.peg.1809	CDS	gi_957788178_gb_LMYF01000002_1_Hypsibius_dujardini_scaffold2	3159	3776	618	hypothetical protein	- none -	3159	3776
fig|6666666.161614.peg.1810	CDS	gi_957788178_gb_LMYF01000002_1_Hypsibius_dujardini_scaffold2	4356	3847	510	FIG018171: hypothetical protein of Cupin superfamily	- none -	3847	4356
fig|6666666.161614.peg.1811	CDS	gi_957788178_gb_LMYF01000002_1_Hypsibius_dujardini_scaffold2	5234	4356	879	hypothetical protein	- none -	4356	5234
fig|6666666.161614.peg.1812	CDS	gi_957788178_gb_LMYF01000002_1_Hypsibius_dujardini_scaffold2	5396	5728	333	hypothetical protein	- none -	5396	5728
fig|6666666.161614.peg.1813	CDS	gi_957788178_gb_LMYF01000002_1_Hypsibius_dujardini_scaffold2	5808	6290	483	FKBP-type peptidyl-prolyl cis-trans isomerase FkpA precursor (EC 5.2.1.8)	Peptidyl-prolyl cis-trans isomerase, Potassium homeostasis	5808	6290
fig|6666666.161614.peg.1814	CDS	gi_957788178_gb_LMYF01000002_1_Hypsibius_dujardini_scaffold2	6433	7839	1407	L-serine dehydratase (EC 4.3.1.17)	Glycine and Serine Utilization, Pyruvate Alanine Serine Interconversions	6433	7839
fig|6666666.161614.peg.1815	CDS	gi_957788178_gb_LMYF01000002_1_Hypsibius_dujardini_scaffold2	8981	7836	1146	Gene SCO4494, often clustered with other genes in menaquinone via futalosine pathway	Menaquinone Biosynthesis via Futalosine	7836	8981
fig|6666666.161614.peg.1816	CDS	gi_957788178_gb_LMYF01000002_1_Hypsibius_dujardini_scaffold2	9134	10399	1266	Nucleoside permease NupG	- none -	9134	10399
fig|6666666.161614.peg.1817	CDS	gi_957788178_gb_LMYF01000002_1_Hypsibius_dujardini_scaffold2	10878	10480	399	Thioredoxin	- none -	10480	10878
fig|6666666.161614.peg.1818	CDS	gi_957788178_gb_LMYF01000002_1_Hypsibius_dujardini_scaffold2	14580	10960	3621	DNA polymerase III alpha subunit (EC 2.7.7.7)	- none -	10960	14580
fig|6666666.161614.peg.1819	CDS	gi_957788178_gb_LMYF01000002_1_Hypsibius_dujardini_scaffold2	15925	14693	1233	Peptidoglycan-binding domain 1	- none -	14693	15925
fig|6666666.161614.peg.1820	CDS	gi_957788178_gb_LMYF01000002_1_Hypsibius_dujardini_scaffold2	16171	16944	774	NLP/P60 family protein	- none -	16171	16944
fig|6666666.161614.peg.1821	CDS	gi_957788178_gb_LMYF01000002_1_Hypsibius_dujardini_scaffold2	18443	16941	1503	Polysaccharide biosynthesis protein	- none -	16941	18443
fig|6666666.161614.peg.1822	CDS	gi_957788178_gb_LMYF01000002_1_Hypsibius_dujardini_scaffold2	20198	18519	1680	Peptidase M1 family protein	- none -	18519	20198
fig|6666666.161614.peg.1823	CDS	gi_957788178_gb_LMYF01000002_1_Hypsibius_dujardini_scaffold2	20248	21879	1632	Dipeptide-binding ABC transporter, periplasmic substrate-binding component (TC 3.A.1.5.2)	ABC transporter dipeptide (TC 3.A.1.5.2)	20248	21879
fig|6666666.161614.peg.1824	CDS	gi_957788178_gb_LMYF01000002_1_Hypsibius_dujardini_scaffold2	22557	21886	672	hypothetical protein	- none -	21886	22557
fig|6666666.161614.peg.1825	CDS	gi_957788178_gb_LMYF01000002_1_Hypsibius_dujardini_scaffold2	22914	22801	114	hypothetical protein	- none -	22801	22914
fig|6666666.161614.peg.1826	CDS	gi_957788178_gb_LMYF01000002_1_Hypsibius_dujardini_scaffold2	23042	24310	1269	hypothetical protein	- none -	23042	24310
fig|6666666.161614.peg.1827	CDS	gi_957788178_gb_LMYF01000002_1_Hypsibius_dujardini_scaffold2	25234	24527	708	hypothetical protein	- none -	24527	25234
fig|6666666.161614.peg.1828	CDS	gi_957788178_gb_LMYF01000002_1_Hypsibius_dujardini_scaffold2	25898	25308	591	Peptide methionine sulfoxide reductase MsrA (EC 1.8.4.11)	Peptide methionine sulfoxide reductase	25308	25898
fig|6666666.161614.peg.1829	CDS	gi_957788178_gb_LMYF01000002_1_Hypsibius_dujardini_scaffold2	26203	26622	420	Predicted DNA-binding protein	- none -	26203	26622
fig|6666666.161614.peg.1830	CDS	gi_957788178_gb_LMYF01000002_1_Hypsibius_dujardini_scaffold2	28153	26624	1530	Sulfate transporter	- none -	26624	28153
fig|6666666.161614.peg.1831	CDS	gi_957788178_gb_LMYF01000002_1_Hypsibius_dujardini_scaffold2	28324	30435	2112	Recombination inhibitory protein MutS2	CBSS-198094.1.peg.4426, DNA repair, bacterial MutL-MutS system	28324	30435
fig|6666666.161614.peg.1832	CDS	gi_957788178_gb_LMYF01000002_1_Hypsibius_dujardini_scaffold2	30942	30511	432	CBS domain protein	- none -	30511	30942
fig|6666666.161614.peg.1833	CDS	gi_957788178_gb_LMYF01000002_1_Hypsibius_dujardini_scaffold2	30962	32092	1131	LacI family transcriptional regulator	- none -	30962	32092
fig|6666666.161614.peg.1834	CDS	gi_957788178_gb_LMYF01000002_1_Hypsibius_dujardini_scaffold2	33865	32168	1698	Protease precursor	- none -	32168	33865
fig|6666666.161614.peg.1835	CDS	gi_957788178_gb_LMYF01000002_1_Hypsibius_dujardini_scaffold2	35504	34005	1500	hypothetical protein	- none -	34005	35504
fig|6666666.161614.peg.1836	CDS	gi_957788178_gb_LMYF01000002_1_Hypsibius_dujardini_scaffold2	37218	35605	1614	Aldehyde dehydrogenase B (EC 1.2.1.22)	Glycerolipid and Glycerophospholipid Metabolism in Bacteria, Methylglyoxal Metabolism	35605	37218
fig|6666666.161614.peg.1837	CDS	gi_957788178_gb_LMYF01000002_1_Hypsibius_dujardini_scaffold2	38056	37241	816	3-methyl-2-oxobutanoate hydroxymethyltransferase (EC 2.1.2.11)	Coenzyme A Biosynthesis, Coenzyme A Biosynthesis cluster	37241	38056
fig|6666666.161614.peg.1838	CDS	gi_957788178_gb_LMYF01000002_1_Hypsibius_dujardini_scaffold2	38988	38092	897	Exopolyphosphatase (EC 3.6.1.11)	Phosphate metabolism, Polyphosphate	38092	38988
fig|6666666.161614.peg.1839	CDS	gi_957788178_gb_LMYF01000002_1_Hypsibius_dujardini_scaffold2	41071	38969	2103	Polyphosphate kinase (EC 2.7.4.1)	Phosphate metabolism, Polyphosphate, Purine conversions	38969	41071
fig|6666666.161614.peg.1840	CDS	gi_957788178_gb_LMYF01000002_1_Hypsibius_dujardini_scaffold2	41641	41150	492	ADP-heptose synthase (EC 2.7.-.-) / D-glycero-beta-D-manno-heptose 7-phosphate kinase	LOS core oligosaccharide biosynthesis, LOS core oligosaccharide biosynthesis	41150	41641
fig|6666666.161614.peg.1841	CDS	gi_957788178_gb_LMYF01000002_1_Hypsibius_dujardini_scaffold2	42641	41628	1014	Putative dolichol-P-glucose synthetase	- none -	41628	42641
fig|6666666.161614.peg.1842	CDS	gi_957788178_gb_LMYF01000002_1_Hypsibius_dujardini_scaffold2	43042	42695	348	Aspartate 1-decarboxylase (EC 4.1.1.11)	Coenzyme A Biosynthesis, Coenzyme A Biosynthesis cluster, Folate biosynthesis cluster	42695	43042
fig|6666666.161614.peg.1843	CDS	gi_957788178_gb_LMYF01000002_1_Hypsibius_dujardini_scaffold2	43911	43060	852	Pantoate--beta-alanine ligase (EC 6.3.2.1)	Coenzyme A Biosynthesis, Coenzyme A Biosynthesis cluster, Folate biosynthesis cluster	43060	43911
fig|6666666.161614.peg.1844	CDS	gi_957788178_gb_LMYF01000002_1_Hypsibius_dujardini_scaffold2	44069	44881	813	Similar to glycogen synthase (EC 2.4.1.21)	- none -	44069	44881
fig|6666666.161614.peg.1845	CDS	gi_957788178_gb_LMYF01000002_1_Hypsibius_dujardini_scaffold2	44913	46385	1473	hypothetical protein	- none -	44913	46385
fig|6666666.161614.peg.1846	CDS	gi_957788178_gb_LMYF01000002_1_Hypsibius_dujardini_scaffold2	46480	47736	1257	S-adenosylmethionine synthetase (EC 2.5.1.6)	Methionine Biosynthesis, Methionine Degradation	46480	47736
fig|6666666.161614.peg.1847	CDS	gi_957788178_gb_LMYF01000002_1_Hypsibius_dujardini_scaffold2	47872	48588	717	23S rRNA (guanosine-2'-O-) -methyltransferase rlmB (EC 2.1.1.-)	RNA methylation	47872	48588
fig|6666666.161614.peg.1848	CDS	gi_957788178_gb_LMYF01000002_1_Hypsibius_dujardini_scaffold2	49780	48590	1191	beta-lactamase	- none -	48590	49780
fig|6666666.161614.peg.1849	CDS	gi_957788178_gb_LMYF01000002_1_Hypsibius_dujardini_scaffold2	50404	49787	618	hypothetical protein	- none -	49787	50404
fig|6666666.161614.peg.1850	CDS	gi_957788178_gb_LMYF01000002_1_Hypsibius_dujardini_scaffold2	51331	50435	897	hypothetical protein	- none -	50435	51331
fig|6666666.161614.peg.1851	CDS	gi_957788178_gb_LMYF01000002_1_Hypsibius_dujardini_scaffold2	51494	51375	120	hypothetical protein	- none -	51375	51494
fig|6666666.161614.peg.1852	CDS	gi_957788178_gb_LMYF01000002_1_Hypsibius_dujardini_scaffold2	51567	52559	993	hypothetical protein	- none -	51567	52559
fig|6666666.161614.peg.1853	CDS	gi_957788178_gb_LMYF01000002_1_Hypsibius_dujardini_scaffold2	53278	52670	609	hypothetical protein	- none -	52670	53278
fig|6666666.161614.peg.1854	CDS	gi_957788178_gb_LMYF01000002_1_Hypsibius_dujardini_scaffold2	53957	53340	618	hypothetical protein	- none -	53340	53957
fig|6666666.161614.peg.1855	CDS	gi_957788178_gb_LMYF01000002_1_Hypsibius_dujardini_scaffold2	54194	55204	1011	hypothetical protein	- none -	54194	55204
fig|6666666.161614.peg.1856	CDS	gi_957788178_gb_LMYF01000002_1_Hypsibius_dujardini_scaffold2	55244	56107	864	Hydroxymethylglutaryl-CoA lyase (EC 4.1.3.4)	Leucine Degradation and HMG-CoA Metabolism	55244	56107
fig|6666666.161614.peg.1857	CDS	gi_957788178_gb_LMYF01000002_1_Hypsibius_dujardini_scaffold2	56133	57122	990	hypothetical protein	- none -	56133	57122
fig|6666666.161614.peg.1858	CDS	gi_957788178_gb_LMYF01000002_1_Hypsibius_dujardini_scaffold2	58153	57107	1047	Aldose 1-epimerase (EC 5.1.3.3)	Lactose and Galactose Uptake and Utilization, Maltose and Maltodextrin Utilization	57107	58153
fig|6666666.161614.peg.1859	CDS	gi_957788178_gb_LMYF01000002_1_Hypsibius_dujardini_scaffold2	59243	58179	1065	hypothetical protein	- none -	58179	59243
fig|6666666.161614.peg.1860	CDS	gi_957788178_gb_LMYF01000002_1_Hypsibius_dujardini_scaffold2	59950	59339	612	tRNA-(ms[2]io[6]A)-hydroxylase (EC 1.-.-.-)	- none -	59339	59950
fig|6666666.161614.peg.1861	CDS	gi_957788178_gb_LMYF01000002_1_Hypsibius_dujardini_scaffold2	59986	61083	1098	8-amino-7-oxononanoate synthase (EC 2.3.1.47)	Biotin biosynthesis, Biotin biosynthesis Experimental, Biotin synthesis cluster	59986	61083
fig|6666666.161614.peg.1862	CDS	gi_957788178_gb_LMYF01000002_1_Hypsibius_dujardini_scaffold2	61174	61443	270	SSU ribosomal protein S15p (S13e)	Ribosome SSU bacterial	61174	61443
fig|6666666.161614.peg.1863	CDS	gi_957788178_gb_LMYF01000002_1_Hypsibius_dujardini_scaffold2	61733	63901	2169	Polyribonucleotide nucleotidyltransferase (EC 2.7.7.8)	- none -	61733	63901
fig|6666666.161614.peg.1864	CDS	gi_957788178_gb_LMYF01000002_1_Hypsibius_dujardini_scaffold2	63944	64759	816	Ribosomal protein L11 methyltransferase (EC 2.1.1.-)	Heat shock dnaK gene cluster extended, Ribosome biogenesis bacterial	63944	64759
fig|6666666.161614.peg.1865	CDS	gi_957788178_gb_LMYF01000002_1_Hypsibius_dujardini_scaffold2	64845	65510	666	Acyl-phosphate:glycerol-3-phosphate O-acyltransferase PlsY	Glycerolipid and Glycerophospholipid Metabolism in Bacteria	64845	65510
fig|6666666.161614.peg.1866	CDS	gi_957788178_gb_LMYF01000002_1_Hypsibius_dujardini_scaffold2	65608	66420	813	peptidase M48, Ste24p	- none -	65608	66420
fig|6666666.161614.peg.1867	CDS	gi_957788178_gb_LMYF01000002_1_Hypsibius_dujardini_scaffold2	66600	67043	444	hypothetical protein	- none -	66600	67043
fig|6666666.161614.peg.1868	CDS	gi_957788178_gb_LMYF01000002_1_Hypsibius_dujardini_scaffold2	67098	67619	522	Adenylate cyclase (EC 4.6.1.1)	cAMP signaling in bacteria	67098	67619
fig|6666666.161614.peg.1869	CDS	gi_957788178_gb_LMYF01000002_1_Hypsibius_dujardini_scaffold2	69645	67612	2034	DNA primase (EC 2.7.7.-)	CBSS-349161.4.peg.2417	67612	69645
fig|6666666.161614.peg.1870	CDS	gi_957788178_gb_LMYF01000002_1_Hypsibius_dujardini_scaffold2	69776	70690	915	hypothetical protein	- none -	69776	70690
fig|6666666.161614.peg.1871	CDS	gi_957788178_gb_LMYF01000002_1_Hypsibius_dujardini_scaffold2	71100	70933	168	hypothetical protein	- none -	70933	71100
fig|6666666.161614.peg.1872	CDS	gi_957788178_gb_LMYF01000002_1_Hypsibius_dujardini_scaffold2	71110	71259	150	hypothetical protein	- none -	71110	71259
fig|6666666.161614.peg.1873	CDS	gi_957788178_gb_LMYF01000002_1_Hypsibius_dujardini_scaffold2	71391	73526	2136	Translation elongation factor G-related protein	Translation elongation factor G family, Translation elongation factors bacterial	71391	73526
fig|6666666.161614.peg.1874	CDS	gi_957788178_gb_LMYF01000002_1_Hypsibius_dujardini_scaffold2	75077	73704	1374	hypothetical protein	- none -	73704	75077
fig|6666666.161614.peg.1875	CDS	gi_957788178_gb_LMYF01000002_1_Hypsibius_dujardini_scaffold2	76027	75143	885	hypothetical protein	- none -	75143	76027
fig|6666666.161614.peg.1876	CDS	gi_957788178_gb_LMYF01000002_1_Hypsibius_dujardini_scaffold2	76235	76354	120	hypothetical protein	- none -	76235	76354
fig|6666666.161614.peg.1877	CDS	gi_957788178_gb_LMYF01000002_1_Hypsibius_dujardini_scaffold2	76413	76826	414	hypothetical protein	- none -	76413	76826
fig|6666666.161614.peg.1878	CDS	gi_957788178_gb_LMYF01000002_1_Hypsibius_dujardini_scaffold2	76860	77582	723	hypothetical protein	- none -	76860	77582
fig|6666666.161614.peg.1879	CDS	gi_957788178_gb_LMYF01000002_1_Hypsibius_dujardini_scaffold2	78311	77643	669	hypothetical protein	- none -	77643	78311
fig|6666666.161614.peg.1880	CDS	gi_957788178_gb_LMYF01000002_1_Hypsibius_dujardini_scaffold2	78702	78346	357	hypothetical protein	- none -	78346	78702
fig|6666666.161614.peg.1881	CDS	gi_957788178_gb_LMYF01000002_1_Hypsibius_dujardini_scaffold2	80474	78705	1770	Glucose-methanol-choline (GMC) oxidoreductase:NAD binding site	Respiratory dehydrogenases 1	78705	80474
fig|6666666.161614.peg.1882	CDS	gi_957788178_gb_LMYF01000002_1_Hypsibius_dujardini_scaffold2	80615	82567	1953	Glycogen debranching enzyme (EC 3.2.1.-) / Pullulanase (EC 3.2.1.41)	Glycogen metabolism, Glycogen metabolism cluster, Maltose and Maltodextrin Utilization, Trehalose Biosynthesis	80615	82567
fig|6666666.161614.peg.1883	CDS	gi_957788178_gb_LMYF01000002_1_Hypsibius_dujardini_scaffold2	83716	82568	1149	hypothetical protein	- none -	82568	83716
fig|6666666.161614.peg.1884	CDS	gi_957788178_gb_LMYF01000002_1_Hypsibius_dujardini_scaffold2	84361	83864	498	hypothetical protein	- none -	83864	84361
fig|6666666.161614.peg.1885	CDS	gi_957788178_gb_LMYF01000002_1_Hypsibius_dujardini_scaffold2	84885	84487	399	RNA-binding protein	- none -	84487	84885
fig|6666666.161614.peg.1886	CDS	gi_957788178_gb_LMYF01000002_1_Hypsibius_dujardini_scaffold2	85739	84975	765	3-oxoacyl-[acyl-carrier protein] reductase (EC 1.1.1.100)	Fatty Acid Biosynthesis FASII	84975	85739
fig|6666666.161614.peg.1887	CDS	gi_957788178_gb_LMYF01000002_1_Hypsibius_dujardini_scaffold2	86216	85833	384	Transcriptional regulator, AraC family	- none -	85833	86216
fig|6666666.161614.peg.1888	CDS	gi_957788178_gb_LMYF01000002_1_Hypsibius_dujardini_scaffold2	86341	86703	363	hypothetical protein	- none -	86341	86703
fig|6666666.161614.peg.1889	CDS	gi_957788178_gb_LMYF01000002_1_Hypsibius_dujardini_scaffold2	86783	87667	885	hypothetical protein	- none -	86783	87667
fig|6666666.161614.peg.1890	CDS	gi_957788178_gb_LMYF01000002_1_Hypsibius_dujardini_scaffold2	88138	87707	432	hypothetical protein	- none -	87707	88138
fig|6666666.161614.peg.1891	CDS	gi_957788178_gb_LMYF01000002_1_Hypsibius_dujardini_scaffold2	88893	88249	645	hypothetical protein	- none -	88249	88893
fig|6666666.161614.peg.1892	CDS	gi_957788178_gb_LMYF01000002_1_Hypsibius_dujardini_scaffold2	89410	88958	453	hypothetical protein	- none -	88958	89410
fig|6666666.161614.peg.1893	CDS	gi_957788178_gb_LMYF01000002_1_Hypsibius_dujardini_scaffold2	89473	90093	621	hypothetical protein	- none -	89473	90093
fig|6666666.161614.peg.1894	CDS	gi_957788178_gb_LMYF01000002_1_Hypsibius_dujardini_scaffold2	90127	90579	453	hypothetical protein	- none -	90127	90579
fig|6666666.161614.peg.1895	CDS	gi_957788178_gb_LMYF01000002_1_Hypsibius_dujardini_scaffold2	90819	90601	219	hypothetical protein	- none -	90601	90819
fig|6666666.161614.peg.1896	CDS	gi_957788178_gb_LMYF01000002_1_Hypsibius_dujardini_scaffold2	91675	90893	783	hypothetical protein	- none -	90893	91675
fig|6666666.161614.peg.1897	CDS	gi_957788178_gb_LMYF01000002_1_Hypsibius_dujardini_scaffold2	93083	91725	1359	Myo-inositol 2-dehydrogenase (EC 1.1.1.18)	- none -	91725	93083
fig|6666666.161614.peg.1898	CDS	gi_957788178_gb_LMYF01000002_1_Hypsibius_dujardini_scaffold2	94466	93111	1356	Probable secreted glycosyl hydrolase	- none -	93111	94466
fig|6666666.161614.peg.1899	CDS	gi_957788178_gb_LMYF01000002_1_Hypsibius_dujardini_scaffold2	94901	94527	375	Lipoprotein, putative	- none -	94527	94901
fig|6666666.161614.peg.1900	CDS	gi_957788178_gb_LMYF01000002_1_Hypsibius_dujardini_scaffold2	95039	96955	1917	hypothetical protein	- none -	95039	96955
fig|6666666.161614.peg.1901	CDS	gi_957788178_gb_LMYF01000002_1_Hypsibius_dujardini_scaffold2	96986	97504	519	hypothetical protein	- none -	96986	97504
fig|6666666.161614.peg.1902	CDS	gi_957788178_gb_LMYF01000002_1_Hypsibius_dujardini_scaffold2	97954	97511	444	hypothetical protein	- none -	97511	97954
fig|6666666.161614.peg.1903	CDS	gi_957788178_gb_LMYF01000002_1_Hypsibius_dujardini_scaffold2	98765	97980	786	hypothetical protein	- none -	97980	98765
fig|6666666.161614.peg.1904	CDS	gi_957788178_gb_LMYF01000002_1_Hypsibius_dujardini_scaffold2	99505	98813	693	hypothetical protein	- none -	98813	99505
fig|6666666.161614.peg.1905	CDS	gi_957788178_gb_LMYF01000002_1_Hypsibius_dujardini_scaffold2	100172	99681	492	hypothetical protein	- none -	99681	100172
fig|6666666.161614.peg.1906	CDS	gi_957788178_gb_LMYF01000002_1_Hypsibius_dujardini_scaffold2	100365	102158	1794	Translation elongation factor LepA	Heat shock dnaK gene cluster extended, Translation elongation factors bacterial	100365	102158
fig|6666666.161614.peg.1907	CDS	gi_957788178_gb_LMYF01000002_1_Hypsibius_dujardini_scaffold2	103230	102214	1017	hypothetical protein	- none -	102214	103230
fig|6666666.161614.peg.1908	CDS	gi_957788178_gb_LMYF01000002_1_Hypsibius_dujardini_scaffold2	104605	103316	1290	D-glycero-D-manno-heptose 1-phosphate guanosyltransferase	Capsular heptose biosynthesis	103316	104605
fig|6666666.161614.peg.1909	CDS	gi_957788178_gb_LMYF01000002_1_Hypsibius_dujardini_scaffold2	105219	104641	579	Phosphoheptose isomerase 1 (EC 5.3.1.-)	Capsular heptose biosynthesis, LOS core oligosaccharide biosynthesis	104641	105219
fig|6666666.161614.peg.1910	CDS	gi_957788178_gb_LMYF01000002_1_Hypsibius_dujardini_scaffold2	106308	105286	1023	D,D-heptose 7-phosphate kinase	Capsular heptose biosynthesis	105286	106308
fig|6666666.161614.peg.1911	CDS	gi_957788178_gb_LMYF01000002_1_Hypsibius_dujardini_scaffold2	106441	106319	123	hypothetical protein	- none -	106319	106441
fig|6666666.161614.peg.1912	CDS	gi_957788178_gb_LMYF01000002_1_Hypsibius_dujardini_scaffold2	107561	106422	1140	Dolichol-phosphate mannosyltransferase (EC 2.4.1.83) in lipid-linked oligosaccharide synthesis cluster	- none -	106422	107561
fig|6666666.161614.peg.1913	CDS	gi_957788178_gb_LMYF01000002_1_Hypsibius_dujardini_scaffold2	108502	107561	942	Glycosyl transferase	- none -	107561	108502
fig|6666666.161614.peg.1914	CDS	gi_957788178_gb_LMYF01000002_1_Hypsibius_dujardini_scaffold2	108992	108504	489	hypothetical protein	- none -	108504	108992
fig|6666666.161614.peg.1915	CDS	gi_957788178_gb_LMYF01000002_1_Hypsibius_dujardini_scaffold2	110270	109008	1263	Dihydroorotase (EC 3.5.2.3)	De Novo Pyrimidine Synthesis	109008	110270
fig|6666666.161614.rna.28	RNA	gi_957788178_gb_LMYF01000002_1_Hypsibius_dujardini_scaffold2	110367	110440	74	tRNA-Pro-GGG	tRNAs	110367	110440
fig|6666666.161614.rna.29	RNA	gi_957788178_gb_LMYF01000002_1_Hypsibius_dujardini_scaffold2	110723	110796	74	tRNA-Pro-CGG	tRNAs	110723	110796
fig|6666666.161614.peg.1916	CDS	gi_957788178_gb_LMYF01000002_1_Hypsibius_dujardini_scaffold2	111147	111614	468	Small heat shock protein	- none -	111147	111614
fig|6666666.161614.peg.1917	CDS	gi_957788178_gb_LMYF01000002_1_Hypsibius_dujardini_scaffold2	111842	111976	135	hypothetical protein	- none -	111842	111976
fig|6666666.161614.peg.1918	CDS	gi_957788178_gb_LMYF01000002_1_Hypsibius_dujardini_scaffold2	115088	112020	3069	Outer membrane assembly protein	- none -	112020	115088
fig|6666666.161614.peg.1919	CDS	gi_957788178_gb_LMYF01000002_1_Hypsibius_dujardini_scaffold2	115552	115205	348	hypothetical protein	- none -	115205	115552
fig|6666666.161614.peg.1920	CDS	gi_957788178_gb_LMYF01000002_1_Hypsibius_dujardini_scaffold2	116450	115611	840	hypothetical protein	- none -	115611	116450
fig|6666666.161614.peg.1921	CDS	gi_957788178_gb_LMYF01000002_1_Hypsibius_dujardini_scaffold2	116650	117099	450	hypothetical protein	- none -	116650	117099
fig|6666666.161614.peg.1922	CDS	gi_957788178_gb_LMYF01000002_1_Hypsibius_dujardini_scaffold2	117399	117124	276	hypothetical protein	- none -	117124	117399
fig|6666666.161614.peg.1923	CDS	gi_957788178_gb_LMYF01000002_1_Hypsibius_dujardini_scaffold2	117374	118255	882	Phenazine biosynthesis protein PhzF like	- none -	117374	118255
fig|6666666.161614.peg.1924	CDS	gi_957788178_gb_LMYF01000002_1_Hypsibius_dujardini_scaffold2	118870	118376	495	PhnB protein; putative DNA binding 3-demethylubiquinone-9 3-methyltransferase domain protein	Alkylphosphonate utilization	118376	118870
fig|6666666.161614.peg.1925	CDS	gi_957788178_gb_LMYF01000002_1_Hypsibius_dujardini_scaffold2	119335	118886	450	Uncharacterized conserved protein	- none -	118886	119335
fig|6666666.161614.peg.1926	CDS	gi_957788178_gb_LMYF01000002_1_Hypsibius_dujardini_scaffold2	120818	119457	1362	sulfatase	- none -	119457	120818
fig|6666666.161614.peg.1927	CDS	gi_957788178_gb_LMYF01000002_1_Hypsibius_dujardini_scaffold2	121578	120940	639	hypothetical protein	- none -	120940	121578
fig|6666666.161614.peg.1928	CDS	gi_957788178_gb_LMYF01000002_1_Hypsibius_dujardini_scaffold2	122780	121734	1047	hypothetical protein	- none -	121734	122780
fig|6666666.161614.peg.1929	CDS	gi_957788178_gb_LMYF01000002_1_Hypsibius_dujardini_scaffold2	124071	122803	1269	Dihydropyrimidine dehydrogenase [NADP+] (EC 1.3.1.2)	Pyrimidine utilization	122803	124071
fig|6666666.161614.peg.1930	CDS	gi_957788178_gb_LMYF01000002_1_Hypsibius_dujardini_scaffold2	124327	124109	219	Conserved protein	- none -	124109	124327
fig|6666666.161614.peg.1931	CDS	gi_957788178_gb_LMYF01000002_1_Hypsibius_dujardini_scaffold2	125812	124469	1344	Pyridine nucleotide-disulphide oxidoreductase associated with reductive pyrimidine catabolism	Pyrimidine utilization	124469	125812
fig|6666666.161614.peg.1932	CDS	gi_957788178_gb_LMYF01000002_1_Hypsibius_dujardini_scaffold2	126812	125946	867	N-carbamoylputrescine amidase (3.5.1.53)	Arginine and Ornithine Degradation, Polyamine Metabolism	125946	126812
fig|6666666.161614.peg.1933	CDS	gi_957788178_gb_LMYF01000002_1_Hypsibius_dujardini_scaffold2	128314	126935	1380	Dihydropyrimidinase (EC 3.5.2.2)	Hydantoin metabolism, Pyrimidine utilization	126935	128314
fig|6666666.161614.peg.1934	CDS	gi_957788178_gb_LMYF01000002_1_Hypsibius_dujardini_scaffold2	129794	128319	1476	Cytosine/purine/uracil/thiamine/allantoin permease family protein	Purine Utilization	128319	129794
fig|6666666.161614.peg.1935	CDS	gi_957788178_gb_LMYF01000002_1_Hypsibius_dujardini_scaffold2	130360	129860	501	Probable transposase	- none -	129860	130360
fig|6666666.161614.peg.1936	CDS	gi_957788178_gb_LMYF01000002_1_Hypsibius_dujardini_scaffold2	131832	130435	1398	hypothetical protein	- none -	130435	131832
fig|6666666.161614.peg.1937	CDS	gi_957788178_gb_LMYF01000002_1_Hypsibius_dujardini_scaffold2	133323	131866	1458	Methylmalonate-semialdehyde dehydrogenase (EC 1.2.1.27)	Valine degradation	131866	133323
fig|6666666.161614.peg.1938	CDS	gi_957788178_gb_LMYF01000002_1_Hypsibius_dujardini_scaffold2	133415	134023	609	tRNA (guanosine(18)-2'-O)-methyltransferase (EC 2.1.1.34)	RNA methylation	133415	134023
fig|6666666.161614.peg.1939	CDS	gi_957788178_gb_LMYF01000002_1_Hypsibius_dujardini_scaffold2	134035	134526	492	hypothetical protein	- none -	134035	134526
fig|6666666.161614.peg.1940	CDS	gi_957788178_gb_LMYF01000002_1_Hypsibius_dujardini_scaffold2	134720	134523	198	hypothetical protein	- none -	134523	134720
fig|6666666.161614.peg.1941	CDS	gi_957788178_gb_LMYF01000002_1_Hypsibius_dujardini_scaffold2	135502	134846	657	Alkyl hydroperoxide reductase and/or thiol-specific antioxidant family (AhpC/TSA) protein	- none -	134846	135502
fig|6666666.161614.peg.1942	CDS	gi_957788178_gb_LMYF01000002_1_Hypsibius_dujardini_scaffold2	136502	135534	969	Inner membrane protein YihY, formerly thought to be RNase BN	CBSS-342610.3.peg.283, LMPTP YfkJ cluster, Riboflavin synthesis cluster	135534	136502
fig|6666666.161614.peg.1943	CDS	gi_957788178_gb_LMYF01000002_1_Hypsibius_dujardini_scaffold2	137548	136505	1044	FIG004453: protein YceG like	CBSS-323097.3.peg.2594, Cluster containing Alanyl-tRNA synthetase	136505	137548
fig|6666666.161614.peg.1944	CDS	gi_957788178_gb_LMYF01000002_1_Hypsibius_dujardini_scaffold2	138023	137655	369	hypothetical protein	- none -	137655	138023
fig|6666666.161614.peg.1945	CDS	gi_957788178_gb_LMYF01000002_1_Hypsibius_dujardini_scaffold2	138951	138025	927	hypothetical protein	- none -	138025	138951
fig|6666666.161614.peg.1946	CDS	gi_957788178_gb_LMYF01000002_1_Hypsibius_dujardini_scaffold2	139559	138972	588	hypothetical protein	- none -	138972	139559
fig|6666666.161614.peg.1947	CDS	gi_957788178_gb_LMYF01000002_1_Hypsibius_dujardini_scaffold2	140811	139549	1263	transcriptional regulator, sigma-54-related	- none -	139549	140811
fig|6666666.161614.peg.1948	CDS	gi_957788178_gb_LMYF01000002_1_Hypsibius_dujardini_scaffold2	142241	140814	1428	tRNA-i(6)A37 methylthiotransferase	Methylthiotransferases, tRNA processing	140814	142241
fig|6666666.161614.peg.1949	CDS	gi_957788178_gb_LMYF01000002_1_Hypsibius_dujardini_scaffold2	142402	144813	2412	TonB-dependent receptor	Ton and Tol transport systems	142402	144813
fig|6666666.161614.rna.30	RNA	gi_957788178_gb_LMYF01000002_1_Hypsibius_dujardini_scaffold2	144894	144822	73	tRNA-Gly-CCC	tRNAs	144822	144894
fig|6666666.161614.peg.1950	CDS	gi_957788178_gb_LMYF01000002_1_Hypsibius_dujardini_scaffold2	145428	144910	519	hypothetical protein	- none -	144910	145428
fig|6666666.161614.peg.1951	CDS	gi_957788178_gb_LMYF01000002_1_Hypsibius_dujardini_scaffold2	145458	145853	396	hypothetical protein	- none -	145458	145853
fig|6666666.161614.peg.1952	CDS	gi_957788178_gb_LMYF01000002_1_Hypsibius_dujardini_scaffold2	145990	146112	123	hypothetical protein	- none -	145990	146112
fig|6666666.161614.peg.1953	CDS	gi_957788178_gb_LMYF01000002_1_Hypsibius_dujardini_scaffold2	146875	146096	780	Iron-sulphur-binding reductase	- none -	146096	146875
fig|6666666.161614.peg.1954	CDS	gi_957788178_gb_LMYF01000002_1_Hypsibius_dujardini_scaffold2	146965	147999	1035	hypothetical protein	- none -	146965	147999
fig|6666666.161614.peg.1955	CDS	gi_957788178_gb_LMYF01000002_1_Hypsibius_dujardini_scaffold2	148061	148771	711	hypothetical protein	- none -	148061	148771
fig|6666666.161614.peg.1956	CDS	gi_957788178_gb_LMYF01000002_1_Hypsibius_dujardini_scaffold2	148776	149285	510	hypothetical protein	- none -	148776	149285
fig|6666666.161614.peg.1957	CDS	gi_957788178_gb_LMYF01000002_1_Hypsibius_dujardini_scaffold2	149779	149291	489	hypothetical protein	- none -	149291	149779
fig|6666666.161614.peg.1958	CDS	gi_957788178_gb_LMYF01000002_1_Hypsibius_dujardini_scaffold2	150193	149864	330	hypothetical protein	- none -	149864	150193
fig|6666666.161614.peg.1959	CDS	gi_957788178_gb_LMYF01000002_1_Hypsibius_dujardini_scaffold2	150923	150198	726	hypothetical protein	- none -	150198	150923
fig|6666666.161614.peg.1960	CDS	gi_957788178_gb_LMYF01000002_1_Hypsibius_dujardini_scaffold2	152270	150948	1323	Iron-sulphur-binding reductase	- none -	150948	152270
fig|6666666.161614.peg.1961	CDS	gi_957788178_gb_LMYF01000002_1_Hypsibius_dujardini_scaffold2	152256	152849	594	Uracil phosphoribosyltransferase (EC 2.4.2.9) / Pyrimidine operon regulatory protein PyrR	De Novo Pyrimidine Synthesis, De Novo Pyrimidine Synthesis, pyrimidine conversions	152256	152849
fig|6666666.161614.peg.1962	CDS	gi_957788178_gb_LMYF01000002_1_Hypsibius_dujardini_scaffold2	153260	152853	408	hypothetical protein	- none -	152853	153260
fig|6666666.161614.peg.1963	CDS	gi_957788178_gb_LMYF01000002_1_Hypsibius_dujardini_scaffold2	154371	153274	1098	hypothetical protein	- none -	153274	154371
fig|6666666.161614.peg.1964	CDS	gi_957788178_gb_LMYF01000002_1_Hypsibius_dujardini_scaffold2	154470	156194	1725	Phosphoglucomutase (EC 5.4.2.2)	- none -	154470	156194
fig|6666666.161614.peg.1965	CDS	gi_957788178_gb_LMYF01000002_1_Hypsibius_dujardini_scaffold2	156296	156532	237	hypothetical protein	- none -	156296	156532
fig|6666666.161614.peg.1966	CDS	gi_957788178_gb_LMYF01000002_1_Hypsibius_dujardini_scaffold2	156560	156961	402	putative membrane protein	- none -	156560	156961
fig|6666666.161614.peg.1967	CDS	gi_957788178_gb_LMYF01000002_1_Hypsibius_dujardini_scaffold2	156969	157667	699	Protein-L-isoaspartate O-methyltransferase (EC 2.1.1.77)	Protein-L-isoaspartate O-methyltransferase, Stationary phase repair cluster, Ton and Tol transport systems	156969	157667
fig|6666666.161614.peg.1968	CDS	gi_957788178_gb_LMYF01000002_1_Hypsibius_dujardini_scaffold2	158717	157782	936	Heat shock protein HtpX (EC 3.4.24.-)	CBSS-393011.11.peg.386	157782	158717
fig|6666666.161614.peg.1969	CDS	gi_957788178_gb_LMYF01000002_1_Hypsibius_dujardini_scaffold2	159280	158720	561	LemA protein	CBSS-393011.11.peg.386	158720	159280
[truncated: 2,516 more rows]
