# Supplementary material for: Identifying contamination with advanced visualization and analysis practices: metagenomic approaches for eukaryotic genome assemblies
Source: PeerJ. 2016 Mar 29;4:e1839. doi: 10.7717/peerj.1839 (PMC4824900; doi:10.7717/peerj.1839)
Supplement: Table S3 — As they are identified in the raw assembly by Boothby et al. (2015), the raw assembly by Koutsovoulos et al. (2016), the curated draft genome of Hypsibius dujardini from Boothby et al. assembly in this study, and the curated draft genome of H. dujardini from Koutsovoulos et al. (2016). [file peerj-04-1839-s005.xlsx]

## Sheet: Matrix
	Origin of the scaffold	Scaffold ID	Single copy gene HMM profile (Campbell et al., 2013)	p-value
	Curated draft genome of Hypsibius dujardini from Boothby et al. assembly in this study	gi_957779399_gb_LMYF01008781_1_Hypsibius_dujardini_scaffold9598	UBA	1.6e-10
	Curated draft genome of Hypsibius dujardini from Boothby et al. assembly in this study	gi_957787705_gb_LMYF01000475_1_Hypsibius_dujardini_scaffold569	tRNA_m1G_MT	3e-15
	Curated draft genome of Hypsibius dujardini from Boothby et al. assembly in this study	gi_957783245_gb_LMYF01004935_1_Hypsibius_dujardini_scaffold5259	RNA_pol_Rpb1_2	1e-21
	Curated draft genome of Hypsibius dujardini from Boothby et al. assembly in this study	gi_957765117_gb_LMYF01019482_1_Hypsibius_dujardini_scaffold22688	RNA_pol_A_bac	3.2e-12
	Curated draft genome of Hypsibius dujardini from Boothby et al. assembly in this study	gi_957785937_gb_LMYF01002243_1_Hypsibius_dujardini_scaffold2447	Ribosomal_S16	2e-09
	Curated draft genome of Hypsibius dujardini from Boothby et al. assembly in this study	gi_957787757_gb_LMYF01000423_1_Hypsibius_dujardini_scaffold513	Ribosomal_L22	1.3e-09
	Curated draft genome of Hypsibius dujardini from Boothby et al. assembly in this study	gi_957780745_gb_LMYF01007435_1_Hypsibius_dujardini_scaffold7968	RNA_pol_Rpb2_6	7.2e-68
	Curated draft genome of Hypsibius dujardini from Boothby et al. assembly in this study	gi_957772524_gb_LMYF01012075_1_Hypsibius_dujardini_scaffold13618	dsrm	1.4e-10
	Curated draft genome of Hypsibius dujardini from Boothby et al. assembly in this study	gi_957787174_gb_LMYF01001006_1_Hypsibius_dujardini_scaffold1152	RNA_pol_Rpb2_6	8.7e-42
	Curated draft genome of Hypsibius dujardini from Boothby et al. assembly in this study	gi_957786724_gb_LMYF01001456_1_Hypsibius_dujardini_scaffold1623	Ribosomal_L23	3.8e-18
	Curated draft genome of Hypsibius dujardini from Boothby et al. assembly in this study	gi_957786926_gb_LMYF01001254_1_Hypsibius_dujardini_scaffold1414	dsrm	1.4e-10
	Curated draft genome of Hypsibius dujardini from Boothby et al. assembly in this study	gi_957779803_gb_LMYF01008377_1_Hypsibius_dujardini_scaffold9099	RNA_pol_Rpb2_1	1.3e-28
	Curated draft genome of Hypsibius dujardini from Boothby et al. assembly in this study	gi_957781548_gb_LMYF01006632_1_Hypsibius_dujardini_scaffold7061	RNA_pol_Rpb2_6	2.8e-68
	Curated draft genome of Hypsibius dujardini from Boothby et al. assembly in this study	gi_957781803_gb_LMYF01006377_1_Hypsibius_dujardini_scaffold6785	Enolase_C	2.7e-37
	Curated draft genome of Hypsibius dujardini from Boothby et al. assembly in this study	gi_957783952_gb_LMYF01004228_1_Hypsibius_dujardini_scaffold4525	Ribosomal_L18e	1.6e-13
	Curated draft genome of Hypsibius dujardini from Boothby et al. assembly in this study	gi_957785847_gb_LMYF01002333_1_Hypsibius_dujardini_scaffold2538	RNA_pol_Rpb1_1	4e-32
	Curated draft genome of Hypsibius dujardini from Boothby et al. assembly in this study	gi_957774085_gb_LMYF01010514_1_Hypsibius_dujardini_scaffold11733	RNA_pol_Rpb2_3	1e-21
	Curated draft genome of Hypsibius dujardini from Boothby et al. assembly in this study	gi_957780591_gb_LMYF01007589_1_Hypsibius_dujardini_scaffold8148	RNA_pol_Rpb1_5	7.7e-36
	Curated draft genome of Hypsibius dujardini from Boothby et al. assembly in this study	gi_957788166_gb_LMYF01000014_1_Hypsibius_dujardini_scaffold16	IF-2	2.8e-16
	Curated draft genome of Hypsibius dujardini from Boothby et al. assembly in this study	gi_957781548_gb_LMYF01006632_1_Hypsibius_dujardini_scaffold7061	RNA_pol_Rpb2_2	1.5e-13
	Curated draft genome of Hypsibius dujardini from Boothby et al. assembly in this study	gi_957780591_gb_LMYF01007589_1_Hypsibius_dujardini_scaffold8148	RNA_pol_Rpb1_3	3.6e-20
	Curated draft genome of Hypsibius dujardini from Boothby et al. assembly in this study	gi_957780474_gb_LMYF01007706_1_Hypsibius_dujardini_scaffold8292	RNA_pol_Rpb2_6	7.6e-24
	Curated draft genome of Hypsibius dujardini from Boothby et al. assembly in this study	gi_957785707_gb_LMYF01002473_1_Hypsibius_dujardini_scaffold2680	GAD	3.3e-11
	Curated draft genome of Hypsibius dujardini from Boothby et al. assembly in this study	gi_957781803_gb_LMYF01006377_1_Hypsibius_dujardini_scaffold6785	Enolase_N	8.2e-21
	Curated draft genome of Hypsibius dujardini from Boothby et al. assembly in this study	gi_957785321_gb_LMYF01002859_1_Hypsibius_dujardini_scaffold3084	Ribosomal_L1	1e-11
	Curated draft genome of Hypsibius dujardini from Boothby et al. assembly in this study	gi_957787944_gb_LMYF01000236_1_Hypsibius_dujardini_scaffold293	IF-2	1.2e-14
	Curated draft genome of Hypsibius dujardini from Boothby et al. assembly in this study	gi_957779803_gb_LMYF01008377_1_Hypsibius_dujardini_scaffold9099	RNA_pol_Rpb2_6	1.5e-14
	Curated draft genome of Hypsibius dujardini from Boothby et al. assembly in this study	gi_957784523_gb_LMYF01003657_1_Hypsibius_dujardini_scaffold3928	THF_DHG_CYH_C	7.8e-16
	Curated draft genome of Hypsibius dujardini from Boothby et al. assembly in this study	gi_957780474_gb_LMYF01007706_1_Hypsibius_dujardini_scaffold8292	RNA_pol_Rpb2_7	2.8e-30
	Curated draft genome of Hypsibius dujardini from Boothby et al. assembly in this study	gi_957774085_gb_LMYF01010514_1_Hypsibius_dujardini_scaffold11733	RNA_pol_Rpb2_7	3.1e-20
	Curated draft genome of Hypsibius dujardini from Boothby et al. assembly in this study	gi_957786993_gb_LMYF01001187_1_Hypsibius_dujardini_scaffold1342	Enolase_N	4.9e-18
	Curated draft genome of Hypsibius dujardini from Boothby et al. assembly in this study	gi_957786470_gb_LMYF01001710_1_Hypsibius_dujardini_scaffold1887	Ribosomal_L11	7e-14
	Curated draft genome of Hypsibius dujardini from Boothby et al. assembly in this study	gi_957785534_gb_LMYF01002646_1_Hypsibius_dujardini_scaffold2859	Ribosomal_L3	5e-27
	Curated draft genome of Hypsibius dujardini from Boothby et al. assembly in this study	gi_957786877_gb_LMYF01001303_1_Hypsibius_dujardini_scaffold1465	Ribosomal_L11	7e-14
	Curated draft genome of Hypsibius dujardini from Boothby et al. assembly in this study	gi_957782452_gb_LMYF01005728_1_Hypsibius_dujardini_scaffold6094	RNA_pol_Rpb1_5	7.8e-18
	Curated draft genome of Hypsibius dujardini from Boothby et al. assembly in this study	gi_957779430_gb_LMYF01008750_1_Hypsibius_dujardini_scaffold9555	dsrm	2.9e-12
	Curated draft genome of Hypsibius dujardini from Boothby et al. assembly in this study	gi_957786374_gb_LMYF01001806_1_Hypsibius_dujardini_scaffold1990	Ribosomal_L14	1.5e-20
	Curated draft genome of Hypsibius dujardini from Boothby et al. assembly in this study	gi_957786626_gb_LMYF01001554_1_Hypsibius_dujardini_scaffold1724	PGK	2.7e-25
	Curated draft genome of Hypsibius dujardini from Boothby et al. assembly in this study	gi_957785950_gb_LMYF01002230_1_Hypsibius_dujardini_scaffold2434	GTP1_OBG	3.4e-19
	Curated draft genome of Hypsibius dujardini from Boothby et al. assembly in this study	gi_957786993_gb_LMYF01001187_1_Hypsibius_dujardini_scaffold1342	Enolase_C	3.8e-37
	Curated draft genome of Hypsibius dujardini from Boothby et al. assembly in this study	gi_957773922_gb_LMYF01010677_1_Hypsibius_dujardini_scaffold11939	RNA_pol_Rpb1_3	7.2e-37
	Curated draft genome of Hypsibius dujardini from Boothby et al. assembly in this study	gi_957786283_gb_LMYF01001897_1_Hypsibius_dujardini_scaffold2087	Enolase_N	2.2e-21
	Curated draft genome of Hypsibius dujardini from Boothby et al. assembly in this study	gi_957780591_gb_LMYF01007589_1_Hypsibius_dujardini_scaffold8148	RNA_pol_Rpb1_3	9.5e-13
	Curated draft genome of Hypsibius dujardini from Boothby et al. assembly in this study	gi_957770608_gb_LMYF01013991_1_Hypsibius_dujardini_scaffold15994	dsrm	4.4e-10
	Curated draft genome of Hypsibius dujardini from Boothby et al. assembly in this study	gi_957783938_gb_LMYF01004242_1_Hypsibius_dujardini_scaffold4540	tRNA-synt_2d	2.9e-23
	Curated draft genome of Hypsibius dujardini from Boothby et al. assembly in this study	gi_957782452_gb_LMYF01005728_1_Hypsibius_dujardini_scaffold6094	RNA_pol_Rpb1_1	1.7e-10
	Curated draft genome of Hypsibius dujardini from Boothby et al. assembly in this study	gi_957787612_gb_LMYF01000568_1_Hypsibius_dujardini_scaffold675	Ribosomal_L29	4.1e-11
	Curated draft genome of Hypsibius dujardini from Boothby et al. assembly in this study	gi_957781725_gb_LMYF01006455_1_Hypsibius_dujardini_scaffold6871	Ribosomal_S11	5.1e-22
	Curated draft genome of Hypsibius dujardini from Boothby et al. assembly in this study	gi_957787213_gb_LMYF01000967_1_Hypsibius_dujardini_scaffold1112	Ribosomal_L3	1.3e-26
	Curated draft genome of Hypsibius dujardini from Boothby et al. assembly in this study	gi_957786961_gb_LMYF01001219_1_Hypsibius_dujardini_scaffold1378	Ribosomal_L10	1.4e-19
	Curated draft genome of Hypsibius dujardini from Boothby et al. assembly in this study	gi_957784606_gb_LMYF01003574_1_Hypsibius_dujardini_scaffold3839	THF_DHG_CYH_C	6.9e-16
	Curated draft genome of Hypsibius dujardini from Boothby et al. assembly in this study	gi_957773922_gb_LMYF01010677_1_Hypsibius_dujardini_scaffold11939	RNA_pol_Rpb1_5	1e-37
	Curated draft genome of Hypsibius dujardini from Boothby et al. assembly in this study	gi_957773658_gb_LMYF01010941_1_Hypsibius_dujardini_scaffold12245	dsrm	2.9e-12
	Curated draft genome of Hypsibius dujardini from Boothby et al. assembly in this study	gi_957785222_gb_LMYF01002958_1_Hypsibius_dujardini_scaffold3191	dsrm	2.9e-12
	Curated draft genome of Hypsibius dujardini from Boothby et al. assembly in this study	gi_957773270_gb_LMYF01011329_1_Hypsibius_dujardini_scaffold12720	Ribosomal_S5_C	5.8e-10
	Curated draft genome of Hypsibius dujardini from Boothby et al. assembly in this study	gi_957783935_gb_LMYF01004245_1_Hypsibius_dujardini_scaffold4543	FDX-ACB	1.4e-29
	Curated draft genome of Hypsibius dujardini from Boothby et al. assembly in this study	gi_957769881_gb_LMYF01014718_1_Hypsibius_dujardini_scaffold16887	Enolase_C	1.1e-30
	Curated draft genome of Hypsibius dujardini from Boothby et al. assembly in this study	gi_957781798_gb_LMYF01006382_1_Hypsibius_dujardini_scaffold6792	RNA_pol_Rpb1_2	1e-21
	Curated draft genome of Hypsibius dujardini from Boothby et al. assembly in this study	gi_957787181_gb_LMYF01000999_1_Hypsibius_dujardini_scaffold1145	RNA_pol_Rpb2_2	9.9e-15
	Curated draft genome of Hypsibius dujardini from Boothby et al. assembly in this study	gi_957783973_gb_LMYF01004207_1_Hypsibius_dujardini_scaffold4504	tRNA-synt_2d	5.2e-21
	Curated draft genome of Hypsibius dujardini from Boothby et al. assembly in this study	gi_957786431_gb_LMYF01001749_1_Hypsibius_dujardini_scaffold1929	Ribosomal_L29	4.1e-11
	Curated draft genome of Hypsibius dujardini from Boothby et al. assembly in this study	gi_957780591_gb_LMYF01007589_1_Hypsibius_dujardini_scaffold8148	RNA_pol_Rpb1_5	2.2e-35
	Curated draft genome of Hypsibius dujardini from Boothby et al. assembly in this study	gi_957780591_gb_LMYF01007589_1_Hypsibius_dujardini_scaffold8148	RNA_pol_Rpb1_1	4e-32
	Curated draft genome of Hypsibius dujardini from Boothby et al. assembly in this study	gi_957772724_gb_LMYF01011875_1_Hypsibius_dujardini_scaffold13379	tRNA_m1G_MT	3.5e-23
	Curated draft genome of Hypsibius dujardini from Boothby et al. assembly in this study	gi_957786430_gb_LMYF01001750_1_Hypsibius_dujardini_scaffold1930	Ribosomal_L16	3e-10
	Curated draft genome of Hypsibius dujardini from Boothby et al. assembly in this study	gi_957784616_gb_LMYF01003564_1_Hypsibius_dujardini_scaffold3828	Ribosomal_S11	4.9e-22
	Curated draft genome of Hypsibius dujardini from Boothby et al. assembly in this study	gi_957782977_gb_LMYF01005203_1_Hypsibius_dujardini_scaffold5540	PGK	1.2e-09
	Curated draft genome of Hypsibius dujardini from Boothby et al. assembly in this study	gi_957783163_gb_LMYF01005017_1_Hypsibius_dujardini_scaffold5348	SecE	2e-17
	Curated draft genome of Hypsibius dujardini from Boothby et al. assembly in this study	gi_957786896_gb_LMYF01001284_1_Hypsibius_dujardini_scaffold1446	tRNA_m1G_MT	3e-15
	Curated draft genome of Hypsibius dujardini from Boothby et al. assembly in this study	gi_957788162_gb_LMYF01000018_1_Hypsibius_dujardini_scaffold20	CTP_synth_N	7.1e-15
	Curated draft genome of Hypsibius dujardini from Boothby et al. assembly in this study	gi_957779803_gb_LMYF01008377_1_Hypsibius_dujardini_scaffold9099	RNA_pol_Rpb2_6	1.7e-26
	Curated draft genome of Hypsibius dujardini from Boothby et al. assembly in this study	gi_957780823_gb_LMYF01007357_1_Hypsibius_dujardini_scaffold7876	Ribosomal_S5_C	5.8e-10
	Curated draft genome of Hypsibius dujardini from Boothby et al. assembly in this study	gi_957780591_gb_LMYF01007589_1_Hypsibius_dujardini_scaffold8148	RNA_pol_Rpb1_1	1.7e-10
	Curated draft genome of Hypsibius dujardini from Boothby et al. assembly in this study	gi_957779635_gb_LMYF01008545_1_Hypsibius_dujardini_scaffold9308	tRNA-synt_1d	1.2e-31
	Curated draft genome of Hypsibius dujardini from Boothby et al. assembly in this study	gi_957780474_gb_LMYF01007706_1_Hypsibius_dujardini_scaffold8292	RNA_pol_Rpb2_1	9.2e-23
	Curated draft genome of Hypsibius dujardini from Boothby et al. assembly in this study	gi_957782452_gb_LMYF01005728_1_Hypsibius_dujardini_scaffold6094	RNA_pol_Rpb1_3	3e-12
	Curated draft genome of Hypsibius dujardini from Boothby et al. assembly in this study	gi_957782150_gb_LMYF01006030_1_Hypsibius_dujardini_scaffold6412	PGK	1.2e-09
	Curated draft genome of Hypsibius dujardini from Boothby et al. assembly in this study	gi_957780367_gb_LMYF01007813_1_Hypsibius_dujardini_scaffold8418	GMP_synt_C	9.3e-18
	Curated draft genome of Hypsibius dujardini from Boothby et al. assembly in this study	gi_957786452_gb_LMYF01001728_1_Hypsibius_dujardini_scaffold1907	GrpE	1.2e-47
	Curated draft genome of Hypsibius dujardini from Boothby et al. assembly in this study	gi_957786702_gb_LMYF01001478_1_Hypsibius_dujardini_scaffold1646	Ribosomal_L2	7.2e-12
	Curated draft genome of Hypsibius dujardini from Boothby et al. assembly in this study	gi_957781729_gb_LMYF01006451_1_Hypsibius_dujardini_scaffold6867	Methyltransf_5	2.3e-64
	Curated draft genome of Hypsibius dujardini from Boothby et al. assembly in this study	gi_957786798_gb_LMYF01001382_1_Hypsibius_dujardini_scaffold1545	RNA_pol_Rpb2_2	5.9e-34
	Curated draft genome of Hypsibius dujardini from Boothby et al. assembly in this study	gi_957786833_gb_LMYF01001347_1_Hypsibius_dujardini_scaffold1510	dsrm	1.4e-18
	Curated draft genome of Hypsibius dujardini from Boothby et al. assembly in this study	gi_957771122_gb_LMYF01013477_1_Hypsibius_dujardini_scaffold15365	eIF-1a	1.9e-27
	Curated draft genome of Hypsibius dujardini from Boothby et al. assembly in this study	gi_957786555_gb_LMYF01001625_1_Hypsibius_dujardini_scaffold1798	Enolase_N	1.1e-18
	Curated draft genome of Hypsibius dujardini from Boothby et al. assembly in this study	gi_957772219_gb_LMYF01012380_1_Hypsibius_dujardini_scaffold13998	dsrm	1.6e-09
	Curated draft genome of Hypsibius dujardini from Boothby et al. assembly in this study	gi_957774143_gb_LMYF01010456_1_Hypsibius_dujardini_scaffold11661	GAD	1.1e-10
	Curated draft genome of Hypsibius dujardini from Boothby et al. assembly in this study	gi_957773922_gb_LMYF01010677_1_Hypsibius_dujardini_scaffold11939	RNA_pol_Rpb1_4	2.6e-17
	Curated draft genome of Hypsibius dujardini from Boothby et al. assembly in this study	gi_957787371_gb_LMYF01000809_1_Hypsibius_dujardini_scaffold941	SecY	2.5e-11
	Curated draft genome of Hypsibius dujardini from Boothby et al. assembly in this study	gi_957786679_gb_LMYF01001501_1_Hypsibius_dujardini_scaffold1669	PseudoU_synth_1	3e-14
	Curated draft genome of Hypsibius dujardini from Boothby et al. assembly in this study	gi_957782030_gb_LMYF01006150_1_Hypsibius_dujardini_scaffold6544	UBA	5.6e-11
	Curated draft genome of Hypsibius dujardini from Boothby et al. assembly in this study	gi_957781548_gb_LMYF01006632_1_Hypsibius_dujardini_scaffold7061	RNA_pol_Rpb2_7	2.8e-30
	Curated draft genome of Hypsibius dujardini from Boothby et al. assembly in this study	gi_957782964_gb_LMYF01005216_1_Hypsibius_dujardini_scaffold5555	UBA	5.6e-11
	Curated draft genome of Hypsibius dujardini from Boothby et al. assembly in this study	gi_957775312_gb_LMYF01009287_1_Hypsibius_dujardini_scaffold10210	UBA	2.2e-10
	Curated draft genome of Hypsibius dujardini from Boothby et al. assembly in this study	gi_957785463_gb_LMYF01002717_1_Hypsibius_dujardini_scaffold2935	Ribosomal_L10	1.1e-18
	Curated draft genome of Hypsibius dujardini from Boothby et al. assembly in this study	gi_957787174_gb_LMYF01001006_1_Hypsibius_dujardini_scaffold1152	RNA_pol_Rpb2_7	3e-20
	Curated draft genome of Hypsibius dujardini from Boothby et al. assembly in this study	gi_957785110_gb_LMYF01003070_1_Hypsibius_dujardini_scaffold3309	IF3_C	6.2e-10
	Curated draft genome of Hypsibius dujardini from Boothby et al. assembly in this study	gi_957787315_gb_LMYF01000865_1_Hypsibius_dujardini_scaffold1003	RNA_pol_Rpb2_1	1.4e-11
	Curated draft genome of Hypsibius dujardini from Boothby et al. assembly in this study	gi_957782452_gb_LMYF01005728_1_Hypsibius_dujardini_scaffold6094	RNA_pol_Rpb1_1	4e-32
	Curated draft genome of Hypsibius dujardini from Boothby et al. assembly in this study	gi_957781118_gb_LMYF01007062_1_Hypsibius_dujardini_scaffold7542	dsrm	3.6e-11
	Curated draft genome of Hypsibius dujardini from Boothby et al. assembly in this study	gi_957787213_gb_LMYF01000967_1_Hypsibius_dujardini_scaffold1112	Ribosomal_L3	4.1e-23
	Curated draft genome of Hypsibius dujardini from Boothby et al. assembly in this study	gi_957782593_gb_LMYF01005587_1_Hypsibius_dujardini_scaffold5944	IF3_C	7.1e-10
	Curated draft genome of Hypsibius dujardini from Boothby et al. assembly in this study	gi_957782184_gb_LMYF01005996_1_Hypsibius_dujardini_scaffold6376	dsrm	2.9e-12
	Curated draft genome of Hypsibius dujardini from Boothby et al. assembly in this study	gi_957787174_gb_LMYF01001006_1_Hypsibius_dujardini_scaffold1152	RNA_pol_Rpb2_2	4.7e-33
	Curated draft genome of Hypsibius dujardini from Boothby et al. assembly in this study	gi_957780745_gb_LMYF01007435_1_Hypsibius_dujardini_scaffold7968	RNA_pol_Rpb2_7	2.8e-30
	Curated draft genome of Hypsibius dujardini from Boothby et al. assembly in this study	gi_957787315_gb_LMYF01000865_1_Hypsibius_dujardini_scaffold1003	RNA_pol_Rpb2_1	5.3e-44
	Curated draft genome of Hypsibius dujardini from Boothby et al. assembly in this study	gi_957762165_gb_LMYF01022434_1_Hypsibius_dujardini_scaffold26201	RNA_pol_A_bac	2e-12
	Curated draft genome of Hypsibius dujardini from Boothby et al. assembly in this study	gi_957786798_gb_LMYF01001382_1_Hypsibius_dujardini_scaffold1545	RNA_pol_Rpb2_7	3.3e-20
	Curated draft genome of Hypsibius dujardini from Boothby et al. assembly in this study	gi_957774085_gb_LMYF01010514_1_Hypsibius_dujardini_scaffold11733	RNA_pol_Rpb2_6	8.7e-42
	Curated draft genome of Hypsibius dujardini from Boothby et al. assembly in this study	gi_957781651_gb_LMYF01006529_1_Hypsibius_dujardini_scaffold6948	Ribosomal_S11	4.9e-22
	Curated draft genome of Hypsibius dujardini from Boothby et al. assembly in this study	gi_957782387_gb_LMYF01005793_1_Hypsibius_dujardini_scaffold6164	Oligomerisation	1.3e-09
	Curated draft genome of Hypsibius dujardini from Boothby et al. assembly in this study	gi_957787228_gb_LMYF01000952_1_Hypsibius_dujardini_scaffold1096	Ribosomal_L16	1.8e-10
	Curated draft genome of Hypsibius dujardini from Boothby et al. assembly in this study	gi_957787436_gb_LMYF01000744_1_Hypsibius_dujardini_scaffold868	RNA_pol_Rpb1_2	1e-21
	Curated draft genome of Hypsibius dujardini from Boothby et al. assembly in this study	gi_957787181_gb_LMYF01000999_1_Hypsibius_dujardini_scaffold1145	RNA_pol_Rpb2_6	1.3e-42
	Curated draft genome of Hypsibius dujardini from Boothby et al. assembly in this study	gi_957781548_gb_LMYF01006632_1_Hypsibius_dujardini_scaffold7061	RNA_pol_Rpb2_6	2.4e-11
	Curated draft genome of Hypsibius dujardini from Boothby et al. assembly in this study	gi_957787120_gb_LMYF01001060_1_Hypsibius_dujardini_scaffold1209	CoaE	3.5e-20
	Curated draft genome of Hypsibius dujardini from Boothby et al. assembly in this study	gi_957781548_gb_LMYF01006632_1_Hypsibius_dujardini_scaffold7061	RNA_pol_Rpb2_3	9.4e-20
	Curated draft genome of Hypsibius dujardini from Boothby et al. assembly in this study	gi_957786173_gb_LMYF01002007_1_Hypsibius_dujardini_scaffold2203	Ribosomal_L18e	5.1e-22
	Curated draft genome of Hypsibius dujardini from Boothby et al. assembly in this study	gi_957784823_gb_LMYF01003357_1_Hypsibius_dujardini_scaffold3611	Ribosomal_L23	3.8e-18
	Curated draft genome of Hypsibius dujardini from Boothby et al. assembly in this study	gi_957773922_gb_LMYF01010677_1_Hypsibius_dujardini_scaffold11939	RNA_pol_Rpb1_1	1.1e-19
	Curated draft genome of Hypsibius dujardini from Boothby et al. assembly in this study	gi_957783106_gb_LMYF01005074_1_Hypsibius_dujardini_scaffold5406	Ribosomal_L4	2.4e-09
	Curated draft genome of Hypsibius dujardini from Boothby et al. assembly in this study	gi_957782728_gb_LMYF01005452_1_Hypsibius_dujardini_scaffold5802	RNA_pol_Rpb2_6	2.4e-11
	Curated draft genome of Hypsibius dujardini from Boothby et al. assembly in this study	gi_957786798_gb_LMYF01001382_1_Hypsibius_dujardini_scaffold1545	RNA_pol_Rpb2_6	1.1e-41
	Curated draft genome of Hypsibius dujardini from Boothby et al. assembly in this study	gi_957788162_gb_LMYF01000018_1_Hypsibius_dujardini_scaffold20	CTP_synth_N	7.4e-37
	Curated draft genome of Hypsibius dujardini from Boothby et al. assembly in this study	gi_957780745_gb_LMYF01007435_1_Hypsibius_dujardini_scaffold7968	RNA_pol_Rpb2_2	3.6e-11
	Curated draft genome of Hypsibius dujardini from Boothby et al. assembly in this study	gi_957780594_gb_LMYF01007586_1_Hypsibius_dujardini_scaffold8144	RNA_pol_Rpb2_3	6.3e-25
	Curated draft genome of Hypsibius dujardini from Boothby et al. assembly in this study	gi_957786626_gb_LMYF01001554_1_Hypsibius_dujardini_scaffold1724	PGK	3.4e-26
	Curated draft genome of Hypsibius dujardini from Boothby et al. assembly in this study	gi_957782452_gb_LMYF01005728_1_Hypsibius_dujardini_scaffold6094	RNA_pol_Rpb1_5	7.7e-36
	Curated draft genome of Hypsibius dujardini from Boothby et al. assembly in this study	gi_957780591_gb_LMYF01007589_1_Hypsibius_dujardini_scaffold8148	RNA_pol_Rpb1_4	6.1e-41
	Curated draft genome of Hypsibius dujardini from Boothby et al. assembly in this study	gi_957787174_gb_LMYF01001006_1_Hypsibius_dujardini_scaffold1152	RNA_pol_Rpb2_6	1.1e-26
	Curated draft genome of Hypsibius dujardini from Boothby et al. assembly in this study	gi_957773922_gb_LMYF01010677_1_Hypsibius_dujardini_scaffold11939	RNA_pol_Rpb1_2	2.9e-35
	Curated draft genome of Hypsibius dujardini from Boothby et al. assembly in this study	gi_957772547_gb_LMYF01012052_1_Hypsibius_dujardini_scaffold13589	RNA_pol_Rpb2_1	1.3e-28
	Curated draft genome of Hypsibius dujardini from Boothby et al. assembly in this study	gi_957783423_gb_LMYF01004757_1_Hypsibius_dujardini_scaffold5077	dsrm	3.6e-11
	Curated draft genome of Hypsibius dujardini from Boothby et al. assembly in this study	gi_957784308_gb_LMYF01003872_1_Hypsibius_dujardini_scaffold4155	S-AdoMet_synt_M	1.4e-25
	Curated draft genome of Hypsibius dujardini from Boothby et al. assembly in this study	gi_957782452_gb_LMYF01005728_1_Hypsibius_dujardini_scaffold6094	RNA_pol_Rpb1_2	8.9e-52
	Curated draft genome of Hypsibius dujardini from Boothby et al. assembly in this study	gi_957780745_gb_LMYF01007435_1_Hypsibius_dujardini_scaffold7968	RNA_pol_Rpb2_6	2.8e-11
	Curated draft genome of Hypsibius dujardini from Boothby et al. assembly in this study	gi_957780594_gb_LMYF01007586_1_Hypsibius_dujardini_scaffold8144	RNA_pol_Rpb2_1	1.4e-28
	Curated draft genome of Hypsibius dujardini from Boothby et al. assembly in this study	gi_957786501_gb_LMYF01001679_1_Hypsibius_dujardini_scaffold1855	Ribosomal_L18e	5.1e-22
	Curated draft genome of Hypsibius dujardini from Boothby et al. assembly in this study	gi_957784348_gb_LMYF01003832_1_Hypsibius_dujardini_scaffold4111	Ribosomal_L16	3.7e-21
	Curated draft genome of Hypsibius dujardini from Boothby et al. assembly in this study	gi_957784766_gb_LMYF01003414_1_Hypsibius_dujardini_scaffold3672	SecY	1.7e-09
	Curated draft genome of Hypsibius dujardini from Boothby et al. assembly in this study	gi_957780591_gb_LMYF01007589_1_Hypsibius_dujardini_scaffold8148	RNA_pol_Rpb1_2	8.9e-52
	Curated draft genome of Hypsibius dujardini from Boothby et al. assembly in this study	gi_957786608_gb_LMYF01001572_1_Hypsibius_dujardini_scaffold1743	Ribosomal_L18e	1.5e-13
	Curated draft genome of Hypsibius dujardini from Boothby et al. assembly in this study	gi_957788126_gb_LMYF01000054_1_Hypsibius_dujardini_scaffold68	EF_TS	4e-16
	Curated draft genome of Hypsibius dujardini from Boothby et al. assembly in this study	gi_957782452_gb_LMYF01005728_1_Hypsibius_dujardini_scaffold6094	RNA_pol_Rpb1_3	5.2e-21
	Curated draft genome of Hypsibius dujardini from Boothby et al. assembly in this study	gi_957787181_gb_LMYF01000999_1_Hypsibius_dujardini_scaffold1145	RNA_pol_Rpb2_1	7.2e-38
	Curated draft genome of Hypsibius dujardini from Boothby et al. assembly in this study	gi_957785483_gb_LMYF01002697_1_Hypsibius_dujardini_scaffold2914	RNA_pol_Rpb2_3	3.6e-28
	Curated draft genome of Hypsibius dujardini from Boothby et al. assembly in this study	gi_957774885_gb_LMYF01009714_1_Hypsibius_dujardini_scaffold10749	Oligomerisation	8e-10
	Curated draft genome of Hypsibius dujardini from Boothby et al. assembly in this study	gi_957786638_gb_LMYF01001542_1_Hypsibius_dujardini_scaffold1712	Ribosomal_L5_C	1.5e-17
	Curated draft genome of Hypsibius dujardini from Boothby et al. assembly in this study	gi_957786023_gb_LMYF01002157_1_Hypsibius_dujardini_scaffold2356	Ribosomal_S9	6.5e-14
	Curated draft genome of Hypsibius dujardini from Boothby et al. assembly in this study	gi_957780474_gb_LMYF01007706_1_Hypsibius_dujardini_scaffold8292	RNA_pol_Rpb2_3	9.4e-20
	Curated draft genome of Hypsibius dujardini from Boothby et al. assembly in this study	gi_957783370_gb_LMYF01004810_1_Hypsibius_dujardini_scaffold5130	Ribosomal_L1	1.3e-11
	Curated draft genome of Hypsibius dujardini from Boothby et al. assembly in this study	gi_957783566_gb_LMYF01004614_1_Hypsibius_dujardini_scaffold4929	Ribosomal_L14	1.9e-19
	Curated draft genome of Hypsibius dujardini from Boothby et al. assembly in this study	gi_957771996_gb_LMYF01012603_1_Hypsibius_dujardini_scaffold14283	dsrm	1.4e-10
	Curated draft genome of Hypsibius dujardini from Boothby et al. assembly in this study	gi_957782977_gb_LMYF01005203_1_Hypsibius_dujardini_scaffold5540	PGK	2.5e-16
	Curated draft genome of Hypsibius dujardini from Boothby et al. assembly in this study	gi_957786638_gb_LMYF01001542_1_Hypsibius_dujardini_scaffold1712	Ribosomal_L5	9.2e-16
	Curated draft genome of Hypsibius dujardini from Boothby et al. assembly in this study	gi_957769881_gb_LMYF01014718_1_Hypsibius_dujardini_scaffold16887	Enolase_N	2.1e-21
	Curated draft genome of Hypsibius dujardini from Boothby et al. assembly in this study	gi_957780591_gb_LMYF01007589_1_Hypsibius_dujardini_scaffold8148	RNA_pol_Rpb1_5	5.6e-19
	Curated draft genome of Hypsibius dujardini from Boothby et al. assembly in this study	gi_957781365_gb_LMYF01006815_1_Hypsibius_dujardini_scaffold7266	TruB_N	2.4e-11
	Curated draft genome of Hypsibius dujardini from Boothby et al. assembly in this study	gi_957783245_gb_LMYF01004935_1_Hypsibius_dujardini_scaffold5259	RNA_pol_Rpb1_2	1.3e-14
	Curated draft genome of Hypsibius dujardini from Boothby et al. assembly in this study	gi_957786798_gb_LMYF01001382_1_Hypsibius_dujardini_scaffold1545	RNA_pol_Rpb2_1	2.3e-30
	Curated draft genome of Hypsibius dujardini from Boothby et al. assembly in this study	gi_957784665_gb_LMYF01003515_1_Hypsibius_dujardini_scaffold3776	UBA	5.6e-11
	Curated draft genome of Hypsibius dujardini from Boothby et al. assembly in this study	gi_957783343_gb_LMYF01004837_1_Hypsibius_dujardini_scaffold5157	RNA_pol_A_bac	6.4e-17
	Curated draft genome of Hypsibius dujardini from Boothby et al. assembly in this study	gi_957786679_gb_LMYF01001501_1_Hypsibius_dujardini_scaffold1669	PseudoU_synth_1	9.7e-15
	Curated draft genome of Hypsibius dujardini from Boothby et al. assembly in this study	gi_957787843_gb_LMYF01000337_1_Hypsibius_dujardini_scaffold411	RNA_pol_Rpb1_4	1.8e-10
	Curated draft genome of Hypsibius dujardini from Boothby et al. assembly in this study	gi_957783534_gb_LMYF01004646_1_Hypsibius_dujardini_scaffold4961	Ribosomal_L4	2.4e-09
	Curated draft genome of Hypsibius dujardini from Boothby et al. assembly in this study	gi_957785744_gb_LMYF01002436_1_Hypsibius_dujardini_scaffold2643	tRNA-synt_1d	1.6e-32
	Curated draft genome of Hypsibius dujardini from Boothby et al. assembly in this study	gi_957786423_gb_LMYF01001757_1_Hypsibius_dujardini_scaffold1937	B5	7.5e-16
	Curated draft genome of Hypsibius dujardini from Boothby et al. assembly in this study	gi_957787174_gb_LMYF01001006_1_Hypsibius_dujardini_scaffold1152	RNA_pol_Rpb2_1	6.7e-28
	Curated draft genome of Hypsibius dujardini from Boothby et al. assembly in this study	gi_957780360_gb_LMYF01007820_1_Hypsibius_dujardini_scaffold8427	Ribosomal_L23	1.8e-18
	Curated draft genome of Hypsibius dujardini from Boothby et al. assembly in this study	gi_957787315_gb_LMYF01000865_1_Hypsibius_dujardini_scaffold1003	RNA_pol_Rpb2_6	3.1e-36
	Curated draft genome of Hypsibius dujardini from Boothby et al. assembly in this study	gi_957785847_gb_LMYF01002333_1_Hypsibius_dujardini_scaffold2538	RNA_pol_Rpb1_5	2.3e-35
	Curated draft genome of Hypsibius dujardini from Boothby et al. assembly in this study	gi_957785236_gb_LMYF01002944_1_Hypsibius_dujardini_scaffold3175	RNA_pol_A_bac	6.4e-17
	Curated draft genome of Hypsibius dujardini from Boothby et al. assembly in this study	gi_957787528_gb_LMYF01000652_1_Hypsibius_dujardini_scaffold767	IF3_C	6.5e-10
	Curated draft genome of Hypsibius dujardini from Boothby et al. assembly in this study	gi_957788122_gb_LMYF01000058_1_Hypsibius_dujardini_scaffold74	Flavokinase	9.2e-12
	Curated draft genome of Hypsibius dujardini from Boothby et al. assembly in this study	gi_957787263_gb_LMYF01000917_1_Hypsibius_dujardini_scaffold1058	dsrm	4.4e-10
	Curated draft genome of Hypsibius dujardini from Boothby et al. assembly in this study	gi_957788002_gb_LMYF01000178_1_Hypsibius_dujardini_scaffold228	dsrm	2.3e-17
	Curated draft genome of Hypsibius dujardini from Boothby et al. assembly in this study	gi_957784225_gb_LMYF01003955_1_Hypsibius_dujardini_scaffold4239	GrpE	3.9e-39
	Curated draft genome of Hypsibius dujardini from Boothby et al. assembly in this study	gi_957788052_gb_LMYF01000128_1_Hypsibius_dujardini_scaffold163	CoaE	1.5e-18
	Curated draft genome of Hypsibius dujardini from Boothby et al. assembly in this study	gi_957784552_gb_LMYF01003628_1_Hypsibius_dujardini_scaffold3896	THF_DHG_CYH_C	1.4e-16
	Curated draft genome of Hypsibius dujardini from Boothby et al. assembly in this study	gi_957784571_gb_LMYF01003609_1_Hypsibius_dujardini_scaffold3875	RNA_pol_Rpb2_1	1.4e-28
	Curated draft genome of Hypsibius dujardini from Boothby et al. assembly in this study	gi_957787315_gb_LMYF01000865_1_Hypsibius_dujardini_scaffold1003	RNA_pol_Rpb2_2	8.1e-45
	Curated draft genome of Hypsibius dujardini from Boothby et al. assembly in this study	gi_957768448_gb_LMYF01016151_1_Hypsibius_dujardini_scaffold18637	dsrm	2.9e-12
	Curated draft genome of Hypsibius dujardini from Boothby et al. assembly in this study	gi_957787843_gb_LMYF01000337_1_Hypsibius_dujardini_scaffold411	RNA_pol_Rpb1_2	1e-21
	Curated draft genome of Hypsibius dujardini from Boothby et al. assembly in this study	gi_957785864_gb_LMYF01002316_1_Hypsibius_dujardini_scaffold2521	Seryl_tRNA_N	4.6e-11
	Curated draft genome of Hypsibius dujardini from Boothby et al. assembly in this study	gi_957784979_gb_LMYF01003201_1_Hypsibius_dujardini_scaffold3443	RNA_pol_A_bac	2.8e-24
	Curated draft genome of Hypsibius dujardini from Boothby et al. assembly in this study	gi_957772667_gb_LMYF01011932_1_Hypsibius_dujardini_scaffold13452	Methyltransf_5	4.5e-25
	Curated draft genome of Hypsibius dujardini from Boothby et al. assembly in this study	gi_957783897_gb_LMYF01004283_1_Hypsibius_dujardini_scaffold4581	dsrm	2.9e-12
	Curated draft genome of Hypsibius dujardini from Boothby et al. assembly in this study	gi_957772733_gb_LMYF01011866_1_Hypsibius_dujardini_scaffold13370	dsrm	1.4e-10
	Curated draft genome of Hypsibius dujardini from Boothby et al. assembly in this study	gi_957787843_gb_LMYF01000337_1_Hypsibius_dujardini_scaffold411	RNA_pol_Rpb1_5	4.9e-33
	Curated draft genome of Hypsibius dujardini from Boothby et al. assembly in this study	gi_957780754_gb_LMYF01007426_1_Hypsibius_dujardini_scaffold7957	GAD	9.7e-11
	Curated draft genome of Hypsibius dujardini from Boothby et al. assembly in this study	gi_957787371_gb_LMYF01000809_1_Hypsibius_dujardini_scaffold941	SecY	5.9e-10
	Curated draft genome of Hypsibius dujardini from Boothby et al. assembly in this study	gi_957780489_gb_LMYF01007691_1_Hypsibius_dujardini_scaffold8274	dsrm	2.2e-09
	Curated draft genome of Hypsibius dujardini from Boothby et al. assembly in this study	gi_957787456_gb_LMYF01000724_1_Hypsibius_dujardini_scaffold847	PseudoU_synth_1	9.7e-15
	Curated draft genome of Hypsibius dujardini from Boothby et al. assembly in this study	gi_957787174_gb_LMYF01001006_1_Hypsibius_dujardini_scaffold1152	RNA_pol_Rpb2_3	8.5e-23
	Curated draft genome of Hypsibius dujardini from Boothby et al. assembly in this study	gi_957782977_gb_LMYF01005203_1_Hypsibius_dujardini_scaffold5540	PGK	2.7e-25
	Curated draft genome of Hypsibius dujardini from Boothby et al. assembly in this study	gi_957780594_gb_LMYF01007586_1_Hypsibius_dujardini_scaffold8144	RNA_pol_Rpb2_2	2.3e-30
	Curated draft genome of Hypsibius dujardini from Boothby et al. assembly in this study	gi_957787494_gb_LMYF01000686_1_Hypsibius_dujardini_scaffold805	IF-2	4.2e-18
	Curated draft genome of Hypsibius dujardini from Boothby et al. assembly in this study	gi_957780745_gb_LMYF01007435_1_Hypsibius_dujardini_scaffold7968	RNA_pol_Rpb2_3	9.4e-20
	Curated draft genome of Hypsibius dujardini from Boothby et al. assembly in this study	gi_957779803_gb_LMYF01008377_1_Hypsibius_dujardini_scaffold9099	RNA_pol_Rpb2_6	1e-24
	Curated draft genome of Hypsibius dujardini from Boothby et al. assembly in this study	gi_957779803_gb_LMYF01008377_1_Hypsibius_dujardini_scaffold9099	RNA_pol_Rpb2_3	5.9e-25
	Curated draft genome of Hypsibius dujardini from Boothby et al. assembly in this study	gi_957787383_gb_LMYF01000797_1_Hypsibius_dujardini_scaffold928	dsrm	2.6e-09
	Curated draft genome of Hypsibius dujardini from Boothby et al. assembly in this study	gi_957788162_gb_LMYF01000018_1_Hypsibius_dujardini_scaffold20	UBA	1e-10
	Curated draft genome of Hypsibius dujardini from Boothby et al. assembly in this study	gi_957782728_gb_LMYF01005452_1_Hypsibius_dujardini_scaffold5802	RNA_pol_Rpb2_6	7.6e-24
	Curated draft genome of Hypsibius dujardini from Boothby et al. assembly in this study	gi_957786993_gb_LMYF01001187_1_Hypsibius_dujardini_scaffold1342	Enolase_N	6.1e-21
	Curated draft genome of Hypsibius dujardini from Boothby et al. assembly in this study	gi_957778981_gb_LMYF01009199_1_Hypsibius_dujardini_scaffold10105	Oligomerisation	8e-10
	Curated draft genome of Hypsibius dujardini from Boothby et al. assembly in this study	gi_957786163_gb_LMYF01002017_1_Hypsibius_dujardini_scaffold2213	tRNA_m1G_MT	3e-15
	Curated draft genome of Hypsibius dujardini from Boothby et al. assembly in this study	gi_957780745_gb_LMYF01007435_1_Hypsibius_dujardini_scaffold7968	RNA_pol_Rpb2_6	7.6e-24
	Curated draft genome of Hypsibius dujardini from Boothby et al. assembly in this study	gi_957780109_gb_LMYF01008071_1_Hypsibius_dujardini_scaffold8723	IF-2	4.2e-18
	Curated draft genome of Hypsibius dujardini from Boothby et al. assembly in this study	gi_957772667_gb_LMYF01011932_1_Hypsibius_dujardini_scaffold13452	Methyltransf_5	7.2e-40
	Curated draft genome of Hypsibius dujardini from Boothby et al. assembly in this study	gi_957781903_gb_LMYF01006277_1_Hypsibius_dujardini_scaffold6681	eIF-1a	1.9e-27
	Curated draft genome of Hypsibius dujardini from Boothby et al. assembly in this study	gi_957787346_gb_LMYF01000834_1_Hypsibius_dujardini_scaffold971	S-AdoMet_synt_M	1e-25
	Curated draft genome of Hypsibius dujardini from Boothby et al. assembly in this study	gi_957784606_gb_LMYF01003574_1_Hypsibius_dujardini_scaffold3839	THF_DHG_CYH_C	1.6e-36
	Curated draft genome of Hypsibius dujardini from Boothby et al. assembly in this study	gi_957788126_gb_LMYF01000054_1_Hypsibius_dujardini_scaffold68	EF_TS	6.1e-16
	Curated draft genome of Hypsibius dujardini from Boothby et al. assembly in this study	gi_957782728_gb_LMYF01005452_1_Hypsibius_dujardini_scaffold5802	RNA_pol_Rpb2_6	2.8e-68
	Curated draft genome of Hypsibius dujardini from Boothby et al. assembly in this study	gi_957774085_gb_LMYF01010514_1_Hypsibius_dujardini_scaffold11733	RNA_pol_Rpb2_6	1.2e-26
	Curated draft genome of Hypsibius dujardini from Boothby et al. assembly in this study	gi_957786626_gb_LMYF01001554_1_Hypsibius_dujardini_scaffold1724	PGK	2.5e-16
	Curated draft genome of Hypsibius dujardini from Boothby et al. assembly in this study	gi_957767763_gb_LMYF01016836_1_Hypsibius_dujardini_scaffold19495	dsrm	1.4e-10
	Curated draft genome of Hypsibius dujardini from Boothby et al. assembly in this study	gi_957784571_gb_LMYF01003609_1_Hypsibius_dujardini_scaffold3875	RNA_pol_Rpb2_3	6.3e-25
	Curated draft genome of Hypsibius dujardini from Boothby et al. assembly in this study	gi_957786771_gb_LMYF01001409_1_Hypsibius_dujardini_scaffold1573	Ribosomal_S15	7.1e-10
	Curated draft genome of Hypsibius dujardini from Boothby et al. assembly in this study	gi_957781548_gb_LMYF01006632_1_Hypsibius_dujardini_scaffold7061	RNA_pol_Rpb2_1	9.2e-23
	Curated draft genome of Hypsibius dujardini from Boothby et al. assembly in this study	gi_957785369_gb_LMYF01002811_1_Hypsibius_dujardini_scaffold3033	THF_DHG_CYH_C	6.1e-27
	Curated draft genome of Hypsibius dujardini from Boothby et al. assembly in this study	gi_957786650_gb_LMYF01001530_1_Hypsibius_dujardini_scaffold1699	Enolase_C	8.4e-50
	Curated draft genome of Hypsibius dujardini from Boothby et al. assembly in this study	gi_957782452_gb_LMYF01005728_1_Hypsibius_dujardini_scaffold6094	RNA_pol_Rpb1_1	8.9e-10
	Curated draft genome of Hypsibius dujardini from Boothby et al. assembly in this study	gi_957786283_gb_LMYF01001897_1_Hypsibius_dujardini_scaffold2087	Enolase_C	2.8e-30
	Curated draft genome of Hypsibius dujardini from Boothby et al. assembly in this study	gi_957786993_gb_LMYF01001187_1_Hypsibius_dujardini_scaffold1342	Enolase_C	1.4e-50
	Curated draft genome of Hypsibius dujardini from Boothby et al. assembly in this study	gi_957787315_gb_LMYF01000865_1_Hypsibius_dujardini_scaffold1003	RNA_pol_Rpb2_7	5.2e-24
	Curated draft genome of Hypsibius dujardini from Boothby et al. assembly in this study	gi_957785327_gb_LMYF01002853_1_Hypsibius_dujardini_scaffold3078	tRNA-synt_1d	1.2e-31
	Curated draft genome of Hypsibius dujardini from Boothby et al. assembly in this study	gi_957785847_gb_LMYF01002333_1_Hypsibius_dujardini_scaffold2538	RNA_pol_Rpb1_5	5.6e-19
	Curated draft genome of Hypsibius dujardini from Boothby et al. assembly in this study	gi_957783832_gb_LMYF01004348_1_Hypsibius_dujardini_scaffold4649	GTP1_OBG	3.4e-19
	Curated draft genome of Hypsibius dujardini from Boothby et al. assembly in this study	gi_957783576_gb_LMYF01004604_1_Hypsibius_dujardini_scaffold4917	PseudoU_synth_1	3e-14
	Curated draft genome of Hypsibius dujardini from Boothby et al. assembly in this study	gi_957788135_gb_LMYF01000045_1_Hypsibius_dujardini_scaffold56	dsrm	4.2e-17
	Curated draft genome of Hypsibius dujardini from Boothby et al. assembly in this study	gi_957780594_gb_LMYF01007586_1_Hypsibius_dujardini_scaffold8144	RNA_pol_Rpb2_6	1.4e-24
	Curated draft genome of Hypsibius dujardini from Boothby et al. assembly in this study	gi_957779803_gb_LMYF01008377_1_Hypsibius_dujardini_scaffold9099	RNA_pol_Rpb2_2	5.3e-30
	Curated draft genome of Hypsibius dujardini from Boothby et al. assembly in this study	gi_957784571_gb_LMYF01003609_1_Hypsibius_dujardini_scaffold3875	RNA_pol_Rpb2_6	1.4e-24
	Curated draft genome of Hypsibius dujardini from Boothby et al. assembly in this study	gi_957783245_gb_LMYF01004935_1_Hypsibius_dujardini_scaffold5259	RNA_pol_Rpb1_1	1.4e-14
	Curated draft genome of Hypsibius dujardini from Boothby et al. assembly in this study	gi_957785265_gb_LMYF01002915_1_Hypsibius_dujardini_scaffold3143	GTP1_OBG	6.5e-12
	Curated draft genome of Hypsibius dujardini from Boothby et al. assembly in this study	gi_957785847_gb_LMYF01002333_1_Hypsibius_dujardini_scaffold2538	RNA_pol_Rpb1_3	3.7e-15
	Curated draft genome of Hypsibius dujardini from Boothby et al. assembly in this study	gi_957782938_gb_LMYF01005242_1_Hypsibius_dujardini_scaffold5582	Ribosomal_S2	3.6e-22
	Curated draft genome of Hypsibius dujardini from Boothby et al. assembly in this study	gi_957787181_gb_LMYF01000999_1_Hypsibius_dujardini_scaffold1145	RNA_pol_Rpb2_6	2.8e-68
	Curated draft genome of Hypsibius dujardini from Boothby et al. assembly in this study	gi_957766095_gb_LMYF01018504_1_Hypsibius_dujardini_scaffold21513	PGK	9.6e-18
	Curated draft genome of Hypsibius dujardini from Boothby et al. assembly in this study	gi_957780474_gb_LMYF01007706_1_Hypsibius_dujardini_scaffold8292	RNA_pol_Rpb2_6	2.8e-68
	Curated draft genome of Hypsibius dujardini from Boothby et al. assembly in this study	gi_957780025_gb_LMYF01008155_1_Hypsibius_dujardini_scaffold8820	RNA_pol_A_bac	6.4e-17
	Curated draft genome of Hypsibius dujardini from Boothby et al. assembly in this study	gi_957781803_gb_LMYF01006377_1_Hypsibius_dujardini_scaffold6785	Enolase_N	6.3e-18
	Curated draft genome of Hypsibius dujardini from Boothby et al. assembly in this study	gi_957782238_gb_LMYF01005942_1_Hypsibius_dujardini_scaffold6316	THF_DHG_CYH_C	1.1e-16
	Curated draft genome of Hypsibius dujardini from Boothby et al. assembly in this study	gi_957786296_gb_LMYF01001884_1_Hypsibius_dujardini_scaffold2074	Ribosomal_L14	1.5e-20
	Curated draft genome of Hypsibius dujardini from Boothby et al. assembly in this study	gi_957780381_gb_LMYF01007799_1_Hypsibius_dujardini_scaffold8403	IF-2	4.2e-18
	Curated draft genome of Hypsibius dujardini from Boothby et al. assembly in this study	gi_957784289_gb_LMYF01003891_1_Hypsibius_dujardini_scaffold4175	GAD	2.8e-11
	Curated draft genome of Hypsibius dujardini from Boothby et al. assembly in this study	gi_957782452_gb_LMYF01005728_1_Hypsibius_dujardini_scaffold6094	RNA_pol_Rpb1_4	6.1e-41
	Curated draft genome of Hypsibius dujardini from Boothby et al. assembly in this study	gi_957785847_gb_LMYF01002333_1_Hypsibius_dujardini_scaffold2538	RNA_pol_Rpb1_1	8.7e-10
	Curated draft genome of Hypsibius dujardini from Boothby et al. assembly in this study	gi_957783245_gb_LMYF01004935_1_Hypsibius_dujardini_scaffold5259	RNA_pol_Rpb1_5	2.7e-33
	Curated draft genome of Hypsibius dujardini from Boothby et al. assembly in this study	gi_957765095_gb_LMYF01019504_1_Hypsibius_dujardini_scaffold22713	RNA_pol_A_bac	2.8e-24
	Curated draft genome of Hypsibius dujardini from Boothby et al. assembly in this study	gi_957786798_gb_LMYF01001382_1_Hypsibius_dujardini_scaffold1545	RNA_pol_Rpb2_3	1e-21
	Curated draft genome of Hypsibius dujardini from Boothby et al. assembly in this study	gi_957785265_gb_LMYF01002915_1_Hypsibius_dujardini_scaffold3143	GTP1_OBG	3.4e-19
	Curated draft genome of Hypsibius dujardini from Boothby et al. assembly in this study	gi_957780669_gb_LMYF01007511_1_Hypsibius_dujardini_scaffold8058	PGK	5.1e-10
	Curated draft genome of Hypsibius dujardini from Boothby et al. assembly in this study	gi_957787774_gb_LMYF01000406_1_Hypsibius_dujardini_scaffold492	Ribosomal_L23	1.8e-18
	Curated draft genome of Hypsibius dujardini from Boothby et al. assembly in this study	gi_957784571_gb_LMYF01003609_1_Hypsibius_dujardini_scaffold3875	RNA_pol_Rpb2_2	2.3e-30
	Curated draft genome of Hypsibius dujardini from Boothby et al. assembly in this study	gi_957787456_gb_LMYF01000724_1_Hypsibius_dujardini_scaffold847	PseudoU_synth_1	3e-14
	Curated draft genome of Hypsibius dujardini from Boothby et al. assembly in this study	gi_957780788_gb_LMYF01007392_1_Hypsibius_dujardini_scaffold7915	SecE	2e-17
	Curated draft genome of Hypsibius dujardini from Boothby et al. assembly in this study	gi_957787027_gb_LMYF01001153_1_Hypsibius_dujardini_scaffold1305	CoaE	1.4e-20
	Curated draft genome of Hypsibius dujardini from Boothby et al. assembly in this study	gi_957785333_gb_LMYF01002847_1_Hypsibius_dujardini_scaffold3072	dsrm	1.7e-13
	Curated draft genome of Hypsibius dujardini from Boothby et al. assembly in this study	gi_957769868_gb_LMYF01014731_1_Hypsibius_dujardini_scaffold16901	THF_DHG_CYH	9.6e-17
	Curated draft genome of Hypsibius dujardini from Boothby et al. assembly in this study	gi_957779268_gb_LMYF01008912_1_Hypsibius_dujardini_scaffold9758	S-AdoMet_synt_M	1e-25
	Curated draft genome of Hypsibius dujardini from Boothby et al. assembly in this study	gi_957787181_gb_LMYF01000999_1_Hypsibius_dujardini_scaffold1145	RNA_pol_Rpb2_7	2.8e-30
	Curated draft genome of Hypsibius dujardini from Boothby et al. assembly in this study	gi_957764314_gb_LMYF01020285_1_Hypsibius_dujardini_scaffold23642	THF_DHG_CYH	3.6e-11
	Curated draft genome of Hypsibius dujardini from Boothby et al. assembly in this study	gi_957783100_gb_LMYF01005080_1_Hypsibius_dujardini_scaffold5414	tRNA-synt_1d	3.9e-23
	Curated draft genome of Hypsibius dujardini from Boothby et al. assembly in this study	gi_957773922_gb_LMYF01010677_1_Hypsibius_dujardini_scaffold11939	RNA_pol_Rpb1_2	6.2e-25
	Curated draft genome of Hypsibius dujardini from Boothby et al. assembly in this study	gi_957787843_gb_LMYF01000337_1_Hypsibius_dujardini_scaffold411	RNA_pol_Rpb1_1	1.4e-14
	Curated draft genome of Hypsibius dujardini from Boothby et al. assembly in this study	gi_957785921_gb_LMYF01002259_1_Hypsibius_dujardini_scaffold2463	Ribosomal_L22	1.4e-09
	Curated draft genome of Hypsibius dujardini from Boothby et al. assembly in this study	gi_957779744_gb_LMYF01008436_1_Hypsibius_dujardini_scaffold9178	SRP_SPB	1.9e-13
	Curated draft genome of Hypsibius dujardini from Boothby et al. assembly in this study	gi_957782728_gb_LMYF01005452_1_Hypsibius_dujardini_scaffold5802	RNA_pol_Rpb2_7	2.8e-30
	Curated draft genome of Hypsibius dujardini from Boothby et al. assembly in this study	gi_957781548_gb_LMYF01006632_1_Hypsibius_dujardini_scaffold7061	RNA_pol_Rpb2_6	7.6e-24
	Curated draft genome of Hypsibius dujardini from Boothby et al. assembly in this study	gi_957780591_gb_LMYF01007589_1_Hypsibius_dujardini_scaffold8148	RNA_pol_Rpb1_3	3.7e-15
	Curated draft genome of Hypsibius dujardini from Boothby et al. assembly in this study	gi_957779268_gb_LMYF01008912_1_Hypsibius_dujardini_scaffold9758	S-AdoMet_synt_C	6e-56
	Curated draft genome of Hypsibius dujardini from Boothby et al. assembly in this study	gi_957780474_gb_LMYF01007706_1_Hypsibius_dujardini_scaffold8292	RNA_pol_Rpb2_6	2.4e-11
	Curated draft genome of Hypsibius dujardini from Boothby et al. assembly in this study	gi_957769868_gb_LMYF01014731_1_Hypsibius_dujardini_scaffold16901	THF_DHG_CYH_C	4.2e-22
	Curated draft genome of Hypsibius dujardini from Boothby et al. assembly in this study	gi_957785369_gb_LMYF01002811_1_Hypsibius_dujardini_scaffold3033	THF_DHG_CYH_C	4e-15
	Curated draft genome of Hypsibius dujardini from Boothby et al. assembly in this study	gi_957783973_gb_LMYF01004207_1_Hypsibius_dujardini_scaffold4504	tRNA-synt_2d	3.2e-32
	Curated draft genome of Hypsibius dujardini from Boothby et al. assembly in this study	gi_957771835_gb_LMYF01012764_1_Hypsibius_dujardini_scaffold14487	Ribosomal_L5_C	1.5e-17
	Curated draft genome of Hypsibius dujardini from Boothby et al. assembly in this study	gi_957784523_gb_LMYF01003657_1_Hypsibius_dujardini_scaffold3928	THF_DHG_CYH_C	6e-37
	Curated draft genome of Hypsibius dujardini from Boothby et al. assembly in this study	gi_957782202_gb_LMYF01005978_1_Hypsibius_dujardini_scaffold6355	Ribosomal_L18e	2.7e-13
	Curated draft genome of Hypsibius dujardini from Boothby et al. assembly in this study	gi_957781679_gb_LMYF01006501_1_Hypsibius_dujardini_scaffold6919	Ribosom_S12_S23	4.6e-17
	Curated draft genome of Hypsibius dujardini from Boothby et al. assembly in this study	gi_957782452_gb_LMYF01005728_1_Hypsibius_dujardini_scaffold6094	RNA_pol_Rpb1_5	2.2e-35
	Curated draft genome of Hypsibius dujardini from Boothby et al. assembly in this study	gi_957779050_gb_LMYF01009130_1_Hypsibius_dujardini_scaffold10014	PGK	7.3e-10
	Curated draft genome of Hypsibius dujardini from Boothby et al. assembly in this study	gi_957787476_gb_LMYF01000704_1_Hypsibius_dujardini_scaffold824	Ribosom_S12_S23	7.6e-36
	Curated draft genome of Hypsibius dujardini from Boothby et al. assembly in this study	gi_957785834_gb_LMYF01002346_1_Hypsibius_dujardini_scaffold2551	Ribosomal_L14	1.5e-20
	Curated draft genome of Hypsibius dujardini from Boothby et al. assembly in this study	gi_957784109_gb_LMYF01004071_1_Hypsibius_dujardini_scaffold4361	Ribosomal_S15	7.3e-10
	Curated draft genome of Hypsibius dujardini from Boothby et al. assembly in this study	gi_957780591_gb_LMYF01007589_1_Hypsibius_dujardini_scaffold8148	RNA_pol_Rpb1_1	8.9e-10
	Curated draft genome of Hypsibius dujardini from Boothby et al. assembly in this study	gi_957784285_gb_LMYF01003895_1_Hypsibius_dujardini_scaffold4179	Ribosomal_L4	2.4e-09
	Curated draft genome of Hypsibius dujardini from Boothby et al. assembly in this study	gi_957780594_gb_LMYF01007586_1_Hypsibius_dujardini_scaffold8144	RNA_pol_Rpb2_6	1.3e-14
	Curated draft genome of Hypsibius dujardini from Boothby et al. assembly in this study	gi_957781258_gb_LMYF01006922_1_Hypsibius_dujardini_scaffold7389	RNA_pol_Rpb2_6	1.5e-36
	Curated draft genome of Hypsibius dujardini from Boothby et al. assembly in this study	gi_957772331_gb_LMYF01012268_1_Hypsibius_dujardini_scaffold13865	Ribosomal_S13	6.9e-22
	Curated draft genome of Hypsibius dujardini from Boothby et al. assembly in this study	gi_957782011_gb_LMYF01006169_1_Hypsibius_dujardini_scaffold6565	RNA_pol_A_bac	6.4e-17
	Curated draft genome of Hypsibius dujardini from Boothby et al. assembly in this study	gi_957784571_gb_LMYF01003609_1_Hypsibius_dujardini_scaffold3875	RNA_pol_Rpb2_6	1.3e-14
	Curated draft genome of Hypsibius dujardini from Boothby et al. assembly in this study	gi_957766095_gb_LMYF01018504_1_Hypsibius_dujardini_scaffold21513	PGK	1.1e-15
	Curated draft genome of Hypsibius dujardini from Boothby et al. assembly in this study	gi_957786798_gb_LMYF01001382_1_Hypsibius_dujardini_scaffold1545	RNA_pol_Rpb2_6	2.2e-28
	Curated draft genome of Hypsibius dujardini from Boothby et al. assembly in this study	gi_957780594_gb_LMYF01007586_1_Hypsibius_dujardini_scaffold8144	RNA_pol_Rpb2_6	1.3e-14
	Curated draft genome of Hypsibius dujardini from Boothby et al. assembly in this study	gi_957785546_gb_LMYF01002634_1_Hypsibius_dujardini_scaffold2847	Ribosomal_L16	3e-10
	Curated draft genome of Hypsibius dujardini from Boothby et al. assembly in this study	gi_957783935_gb_LMYF01004245_1_Hypsibius_dujardini_scaffold4543	tRNA-synt_2d	7.9e-32
	Curated draft genome of Hypsibius dujardini from Boothby et al. assembly in this study	gi_957780474_gb_LMYF01007706_1_Hypsibius_dujardini_scaffold8292	RNA_pol_Rpb2_2	1.5e-13
	Curated draft genome of Hypsibius dujardini from Boothby et al. assembly in this study	gi_957787181_gb_LMYF01000999_1_Hypsibius_dujardini_scaffold1145	RNA_pol_Rpb2_3	9.4e-20
	Curated draft genome of Hypsibius dujardini from Boothby et al. assembly in this study	gi_957788162_gb_LMYF01000018_1_Hypsibius_dujardini_scaffold20	CTP_synth_N	1.3e-28
	Curated draft genome of Hypsibius dujardini from Boothby et al. assembly in this study	gi_957787654_gb_LMYF01000526_1_Hypsibius_dujardini_scaffold627	Ribosomal_S4	1.2e-21
	Raw assembly by Boothby et al. (2015)	gi_957788173_gb_LMYF01000007_1_Hypsibius_dujardini_scaffold7	Ribosomal_L19	1.6e-44
	Raw assembly by Boothby et al. (2015)	gi_957772648_gb_LMYF01011951_1_Hypsibius_dujardini_scaffold13473	Trigger_N	1.8e-38
	Raw assembly by Boothby et al. (2015)	gi_957780697_gb_LMYF01007483_1_Hypsibius_dujardini_scaffold8023	tRNA-synt_1d	2.1e-54
	Raw assembly by Boothby et al. (2015)	gi_957786316_gb_LMYF01001864_1_Hypsibius_dujardini_scaffold2052	UPF0079	6.2e-31
	Raw assembly by Boothby et al. (2015)	gi_957788166_gb_LMYF01000014_1_Hypsibius_dujardini_scaffold16	IF-2	2.8e-16
	Raw assembly by Boothby et al. (2015)	gi_957765259_gb_LMYF01019340_1_Hypsibius_dujardini_scaffold22525	Ribosomal_L5_C	1e-41
	Raw assembly by Boothby et al. (2015)	gi_957787705_gb_LMYF01000475_1_Hypsibius_dujardini_scaffold569	tRNA_m1G_MT	3e-15
	Raw assembly by Boothby et al. (2015)	gi_957787552_gb_LMYF01000628_1_Hypsibius_dujardini_scaffold740	Cytidylate_kin	5.6e-53
	Raw assembly by Boothby et al. (2015)	gi_957781729_gb_LMYF01006451_1_Hypsibius_dujardini_scaffold6867	Methyltransf_5	2.3e-64
	Raw assembly by Boothby et al. (2015)	gi_957768646_gb_LMYF01015953_1_Hypsibius_dujardini_scaffold18391	CoaE	9e-43
	Raw assembly by Boothby et al. (2015)	gi_957780179_gb_LMYF01008001_1_Hypsibius_dujardini_scaffold8642	tRNA_m1G_MT	7.4e-49
	Raw assembly by Boothby et al. (2015)	gi_957770277_gb_LMYF01014322_1_Hypsibius_dujardini_scaffold16395	TRCF	1.8e-25
	Raw assembly by Boothby et al. (2015)	gi_957782242_gb_LMYF01005938_1_Hypsibius_dujardini_scaffold6312	Ribosomal_L27	1.4e-31
	Raw assembly by Boothby et al. (2015)	gi_957787850_gb_LMYF01000330_1_Hypsibius_dujardini_scaffold404	PseudoU_synth_1	9.4e-33
	Raw assembly by Boothby et al. (2015)	gi_957775025_gb_LMYF01009574_1_Hypsibius_dujardini_scaffold10574	B5	1.3e-19
	Raw assembly by Boothby et al. (2015)	gi_957771835_gb_LMYF01012764_1_Hypsibius_dujardini_scaffold14487	Ribosomal_L5_C	1.5e-17
	Raw assembly by Boothby et al. (2015)	gi_957783765_gb_LMYF01004415_1_Hypsibius_dujardini_scaffold4718	Ribosomal_L18e	3.2e-22
	Raw assembly by Boothby et al. (2015)	gi_957782716_gb_LMYF01005464_1_Hypsibius_dujardini_scaffold5814	MurB_C	6.8e-33
	Raw assembly by Boothby et al. (2015)	gi_957773629_gb_LMYF01010970_1_Hypsibius_dujardini_scaffold12284	Ribosomal_L3	4.3e-41
	Raw assembly by Boothby et al. (2015)	gi_957788168_gb_LMYF01000012_1_Hypsibius_dujardini_scaffold14	GidB	8.7e-38
	Raw assembly by Boothby et al. (2015)	gi_957784155_gb_LMYF01004025_1_Hypsibius_dujardini_scaffold4314	Ribosomal_L2	2e-32
	Raw assembly by Boothby et al. (2015)	gi_957782030_gb_LMYF01006150_1_Hypsibius_dujardini_scaffold6544	UBA	5.6e-11
	Raw assembly by Boothby et al. (2015)	gi_957787850_gb_LMYF01000330_1_Hypsibius_dujardini_scaffold404	RNA_pol_L	6.4e-24
	Raw assembly by Boothby et al. (2015)	gi_957788168_gb_LMYF01000012_1_Hypsibius_dujardini_scaffold14	GMP_synt_C	2e-42
	Raw assembly by Boothby et al. (2015)	gi_957787997_gb_LMYF01000183_1_Hypsibius_dujardini_scaffold233	RuvA_N	3.6e-23
	Raw assembly by Boothby et al. (2015)	gi_957780489_gb_LMYF01007691_1_Hypsibius_dujardini_scaffold8274	dsrm	2.2e-09
	Raw assembly by Boothby et al. (2015)	gi_957785751_gb_LMYF01002429_1_Hypsibius_dujardini_scaffold2636	Ribosomal_S17	2.6e-13
	Raw assembly by Boothby et al. (2015)	gi_957772931_gb_LMYF01011668_1_Hypsibius_dujardini_scaffold13136	FAD_syn	7.4e-21
	Raw assembly by Boothby et al. (2015)	gi_957762209_gb_LMYF01022390_1_Hypsibius_dujardini_scaffold26147	Arg_tRNA_synt_N	3.8e-13
	Raw assembly by Boothby et al. (2015)	gi_957787180_gb_LMYF01001000_1_Hypsibius_dujardini_scaffold1146	S-AdoMet_synt_M	1.3e-45
	Raw assembly by Boothby et al. (2015)	gi_957780522_gb_LMYF01007658_1_Hypsibius_dujardini_scaffold8237	PNPase	7.2e-13
	Raw assembly by Boothby et al. (2015)	gi_957783245_gb_LMYF01004935_1_Hypsibius_dujardini_scaffold5259	RNA_pol_Rpb1_2	1.3e-14
	Raw assembly by Boothby et al. (2015)	gi_957772108_gb_LMYF01012491_1_Hypsibius_dujardini_scaffold14137	zf-C4_ClpX	4.4e-11
	Raw assembly by Boothby et al. (2015)	gi_957787415_gb_LMYF01000765_1_Hypsibius_dujardini_scaffold892	FDX-ACB	3.9e-21
	Raw assembly by Boothby et al. (2015)	gi_957765259_gb_LMYF01019340_1_Hypsibius_dujardini_scaffold22525	Ribosomal_L16	1.7e-33
	Raw assembly by Boothby et al. (2015)	gi_957787371_gb_LMYF01000809_1_Hypsibius_dujardini_scaffold941	SecY	5.9e-10
	Raw assembly by Boothby et al. (2015)	gi_957788174_gb_LMYF01000006_1_Hypsibius_dujardini_scaffold6	UBA	3.8e-10
	Raw assembly by Boothby et al. (2015)	gi_957765259_gb_LMYF01019340_1_Hypsibius_dujardini_scaffold22525	Ribosomal_S17	5.9e-29
	Raw assembly by Boothby et al. (2015)	gi_957773596_gb_LMYF01011003_1_Hypsibius_dujardini_scaffold12321	Ribosomal_S4	2.5e-16
	Raw assembly by Boothby et al. (2015)	gi_957773027_gb_LMYF01011572_1_Hypsibius_dujardini_scaffold13017	Ribosomal_S4	2.1e-21
	Raw assembly by Boothby et al. (2015)	gi_957782113_gb_LMYF01006067_1_Hypsibius_dujardini_scaffold6453	Trigger_C	3.4e-20
	Raw assembly by Boothby et al. (2015)	gi_957784308_gb_LMYF01003872_1_Hypsibius_dujardini_scaffold4155	S-AdoMet_synt_M	1.4e-25
	Raw assembly by Boothby et al. (2015)	gi_957763278_gb_LMYF01021321_1_Hypsibius_dujardini_scaffold24877	TIM	2.8e-86
	Raw assembly by Boothby et al. (2015)	gi_957788174_gb_LMYF01000006_1_Hypsibius_dujardini_scaffold6	GrpE	4.5e-52
	Raw assembly by Boothby et al. (2015)	gi_957769696_gb_LMYF01014903_1_Hypsibius_dujardini_scaffold17111	tRNA-synt_1d	2.3e-38
	Raw assembly by Boothby et al. (2015)	gi_957788172_gb_LMYF01000008_1_Hypsibius_dujardini_scaffold8	TruB_N	1e-55
	Raw assembly by Boothby et al. (2015)	gi_957764375_gb_LMYF01020224_1_Hypsibius_dujardini_scaffold23573	DNA_pol3_beta_2	3e-31
	Raw assembly by Boothby et al. (2015)	gi_957786423_gb_LMYF01001757_1_Hypsibius_dujardini_scaffold1937	B5	7.5e-16
	Raw assembly by Boothby et al. (2015)	gi_957788172_gb_LMYF01000008_1_Hypsibius_dujardini_scaffold8	Ribosomal_S20p	1.7e-14
	Raw assembly by Boothby et al. (2015)	gi_957786993_gb_LMYF01001187_1_Hypsibius_dujardini_scaffold1342	Enolase_C	3.8e-37
	Raw assembly by Boothby et al. (2015)	gi_957774085_gb_LMYF01010514_1_Hypsibius_dujardini_scaffold11733	RNA_pol_Rpb2_6	1.2e-26
	Raw assembly by Boothby et al. (2015)	gi_957785160_gb_LMYF01003020_1_Hypsibius_dujardini_scaffold3257	DNA_pol3_beta_3	4.3e-35
	Raw assembly by Boothby et al. (2015)	gi_957775245_gb_LMYF01009354_1_Hypsibius_dujardini_scaffold10305	Ribosomal_S16	1.9e-22
	Raw assembly by Boothby et al. (2015)	gi_957768448_gb_LMYF01016151_1_Hypsibius_dujardini_scaffold18637	dsrm	2.9e-12
	Raw assembly by Boothby et al. (2015)	gi_957785972_gb_LMYF01002208_1_Hypsibius_dujardini_scaffold2411	PNPase	6.7e-12
	Raw assembly by Boothby et al. (2015)	gi_957774430_gb_LMYF01010169_1_Hypsibius_dujardini_scaffold11312	Peptidase_A8	5.7e-40
	Raw assembly by Boothby et al. (2015)	gi_957780940_gb_LMYF01007240_1_Hypsibius_dujardini_scaffold7741	SmpB	4.2e-29
	Raw assembly by Boothby et al. (2015)	gi_957781401_gb_LMYF01006779_1_Hypsibius_dujardini_scaffold7227	THF_DHG_CYH	1.2e-36
	Raw assembly by Boothby et al. (2015)	gi_957782452_gb_LMYF01005728_1_Hypsibius_dujardini_scaffold6094	RNA_pol_Rpb1_5	2.2e-35
	Raw assembly by Boothby et al. (2015)	gi_957784823_gb_LMYF01003357_1_Hypsibius_dujardini_scaffold3611	Ribosomal_L23	3.8e-18
	Raw assembly by Boothby et al. (2015)	gi_957768835_gb_LMYF01015764_1_Hypsibius_dujardini_scaffold18143	zf-C4_ClpX	4.5e-11
	Raw assembly by Boothby et al. (2015)	gi_957785864_gb_LMYF01002316_1_Hypsibius_dujardini_scaffold2521	Seryl_tRNA_N	4.6e-11
	Raw assembly by Boothby et al. (2015)	gi_957785216_gb_LMYF01002964_1_Hypsibius_dujardini_scaffold3197	FDX-ACB	2e-28
	Raw assembly by Boothby et al. (2015)	gi_957787181_gb_LMYF01000999_1_Hypsibius_dujardini_scaffold1145	RNA_pol_Rpb2_2	9.9e-15
	Raw assembly by Boothby et al. (2015)	gi_957771709_gb_LMYF01012890_1_Hypsibius_dujardini_scaffold14635	S-AdoMet_synt_C	1.8e-62
	Raw assembly by Boothby et al. (2015)	gi_957788172_gb_LMYF01000008_1_Hypsibius_dujardini_scaffold8	Val_tRNA-synt_C	2.8e-14
	Raw assembly by Boothby et al. (2015)	gi_957771234_gb_LMYF01013365_1_Hypsibius_dujardini_scaffold15230	zf-C4_ClpX	8e-24
	Raw assembly by Boothby et al. (2015)	gi_957773430_gb_LMYF01011169_1_Hypsibius_dujardini_scaffold12527	RuvA_N	6.7e-24
	Raw assembly by Boothby et al. (2015)	gi_957762506_gb_LMYF01022093_1_Hypsibius_dujardini_scaffold25801	S-AdoMet_synt_C	5.6e-28
	Raw assembly by Boothby et al. (2015)	gi_957785717_gb_LMYF01002463_1_Hypsibius_dujardini_scaffold2670	RNA_pol_A_bac	2.7e-19
	Raw assembly by Boothby et al. (2015)	gi_957788172_gb_LMYF01000008_1_Hypsibius_dujardini_scaffold8	FAD_syn	1.8e-49
	Raw assembly by Boothby et al. (2015)	gi_957787456_gb_LMYF01000724_1_Hypsibius_dujardini_scaffold847	PseudoU_synth_1	9.7e-15
	Raw assembly by Boothby et al. (2015)	gi_957781770_gb_LMYF01006410_1_Hypsibius_dujardini_scaffold6823	Ribosomal_L12	1.2e-29
	Raw assembly by Boothby et al. (2015)	gi_957788176_gb_LMYF01000004_1_Hypsibius_dujardini_scaffold4	tRNA-synt_2d	3.9e-105
	Raw assembly by Boothby et al. (2015)	gi_957782938_gb_LMYF01005242_1_Hypsibius_dujardini_scaffold5582	Ribosomal_S2	3.6e-22
	Raw assembly by Boothby et al. (2015)	gi_957781770_gb_LMYF01006410_1_Hypsibius_dujardini_scaffold6823	Ribosomal_L1	1.2e-50
	Raw assembly by Boothby et al. (2015)	gi_957788176_gb_LMYF01000004_1_Hypsibius_dujardini_scaffold4	DNA_pol3_beta_3	1.1e-26
	Raw assembly by Boothby et al. (2015)	gi_957784637_gb_LMYF01003543_1_Hypsibius_dujardini_scaffold3806	Peptidase_A8	6.4e-41
	Raw assembly by Boothby et al. (2015)	gi_957783765_gb_LMYF01004415_1_Hypsibius_dujardini_scaffold4718	Ribosomal_L18p	2.8e-35
	Raw assembly by Boothby et al. (2015)	gi_957788176_gb_LMYF01000004_1_Hypsibius_dujardini_scaffold4	DNA_pol3_beta_2	5.1e-34
	Raw assembly by Boothby et al. (2015)	gi_957769101_gb_LMYF01015498_1_Hypsibius_dujardini_scaffold17830	Ribosomal_L1	1.7e-44
	Raw assembly by Boothby et al. (2015)	gi_957781758_gb_LMYF01006422_1_Hypsibius_dujardini_scaffold6836	PNPase	9e-10
	Raw assembly by Boothby et al. (2015)	gi_957767114_gb_LMYF01017485_1_Hypsibius_dujardini_scaffold20266	RNA_pol_A_bac	2.1e-20
	Raw assembly by Boothby et al. (2015)	gi_957788176_gb_LMYF01000004_1_Hypsibius_dujardini_scaffold4	RecA	4.2e-167
	Raw assembly by Boothby et al. (2015)	gi_957779665_gb_LMYF01008515_1_Hypsibius_dujardini_scaffold9272	tRNA_m1G_MT	2.2e-48
	Raw assembly by Boothby et al. (2015)	gi_957782081_gb_LMYF01006099_1_Hypsibius_dujardini_scaffold6491	GMP_synt_C	8.1e-41
	Raw assembly by Boothby et al. (2015)	gi_957774904_gb_LMYF01009695_1_Hypsibius_dujardini_scaffold10726	S-AdoMet_synt_C	5.8e-68
	Raw assembly by Boothby et al. (2015)	gi_957787112_gb_LMYF01001068_1_Hypsibius_dujardini_scaffold1217	YchF-GTPase_C	5.3e-44
	Raw assembly by Boothby et al. (2015)	gi_957788171_gb_LMYF01000009_1_Hypsibius_dujardini_scaffold9	Ribosomal_L9_N	1.6e-25
	Raw assembly by Boothby et al. (2015)	gi_957788175_gb_LMYF01000005_1_Hypsibius_dujardini_scaffold5	UPF0054	1.7e-32
	Raw assembly by Boothby et al. (2015)	gi_957784766_gb_LMYF01003414_1_Hypsibius_dujardini_scaffold3672	SecY	1.7e-09
	Raw assembly by Boothby et al. (2015)	gi_957780932_gb_LMYF01007248_1_Hypsibius_dujardini_scaffold7749	UvrB	7.1e-24
	Raw assembly by Boothby et al. (2015)	gi_957788175_gb_LMYF01000005_1_Hypsibius_dujardini_scaffold5	zf-C4_ClpX	4.3e-11
	Raw assembly by Boothby et al. (2015)	gi_957781770_gb_LMYF01006410_1_Hypsibius_dujardini_scaffold6823	Ribosomal_L11_N	3.8e-27
	Raw assembly by Boothby et al. (2015)	gi_957787773_gb_LMYF01000407_1_Hypsibius_dujardini_scaffold493	TRCF	3.8e-26
	Raw assembly by Boothby et al. (2015)	gi_957788176_gb_LMYF01000004_1_Hypsibius_dujardini_scaffold4	Competence	6.4e-61
	Raw assembly by Boothby et al. (2015)	gi_957786650_gb_LMYF01001530_1_Hypsibius_dujardini_scaffold1699	Enolase_C	8.4e-50
	Raw assembly by Boothby et al. (2015)	gi_957788171_gb_LMYF01000009_1_Hypsibius_dujardini_scaffold9	Ribosomal_S6	9.9e-27
	Raw assembly by Boothby et al. (2015)	gi_957781758_gb_LMYF01006422_1_Hypsibius_dujardini_scaffold6836	RBFA	8e-23
	Raw assembly by Boothby et al. (2015)	gi_957774912_gb_LMYF01009687_1_Hypsibius_dujardini_scaffold10713	GTP1_OBG	2.4e-65
	Raw assembly by Boothby et al. (2015)	gi_957785717_gb_LMYF01002463_1_Hypsibius_dujardini_scaffold2670	Ribosomal_L12	6.2e-31
	Raw assembly by Boothby et al. (2015)	gi_957769393_gb_LMYF01015206_1_Hypsibius_dujardini_scaffold17481	Ribosomal_L23	1.1e-30
	Raw assembly by Boothby et al. (2015)	gi_957782677_gb_LMYF01005503_1_Hypsibius_dujardini_scaffold5855	EF_TS	1.1e-64
	Raw assembly by Boothby et al. (2015)	gi_957788174_gb_LMYF01000006_1_Hypsibius_dujardini_scaffold6	RNA_pol_Rpb1_4	2.9e-10
	Raw assembly by Boothby et al. (2015)	gi_957785717_gb_LMYF01002463_1_Hypsibius_dujardini_scaffold2670	Ribosomal_S13	9.7e-39
	Raw assembly by Boothby et al. (2015)	gi_957771630_gb_LMYF01012969_1_Hypsibius_dujardini_scaffold14729	IF3_C	7e-29
	Raw assembly by Boothby et al. (2015)	gi_957780109_gb_LMYF01008071_1_Hypsibius_dujardini_scaffold8723	IF-2	4.2e-18
	Raw assembly by Boothby et al. (2015)	gi_957786100_gb_LMYF01002080_1_Hypsibius_dujardini_scaffold2278	Ribosomal_L32p	6.7e-24
	Raw assembly by Boothby et al. (2015)	gi_957788178_gb_LMYF01000002_1_Hypsibius_dujardini_scaffold2	Cons_hypoth95	5.2e-33
	Raw assembly by Boothby et al. (2015)	gi_957773253_gb_LMYF01011346_1_Hypsibius_dujardini_scaffold12741	DNA_pol3_beta_2	2.3e-33
	Raw assembly by Boothby et al. (2015)	gi_957787850_gb_LMYF01000330_1_Hypsibius_dujardini_scaffold404	Ribosomal_S11	3.8e-49
	Raw assembly by Boothby et al. (2015)	gi_957786798_gb_LMYF01001382_1_Hypsibius_dujardini_scaffold1545	RNA_pol_Rpb2_2	5.9e-34
	Raw assembly by Boothby et al. (2015)	gi_957781758_gb_LMYF01006422_1_Hypsibius_dujardini_scaffold6836	IF-2	9.8e-38
	Raw assembly by Boothby et al. (2015)	gi_957788178_gb_LMYF01000002_1_Hypsibius_dujardini_scaffold2	SmpB	2.4e-19
	Raw assembly by Boothby et al. (2015)	gi_957773253_gb_LMYF01011346_1_Hypsibius_dujardini_scaffold12741	DNA_pol3_beta_3	1.3e-24
	Raw assembly by Boothby et al. (2015)	gi_957788173_gb_LMYF01000007_1_Hypsibius_dujardini_scaffold7	EF_TS	2.4e-67
	Raw assembly by Boothby et al. (2015)	gi_957774806_gb_LMYF01009793_1_Hypsibius_dujardini_scaffold10846	Peptidase_A8	8.7e-40
	Raw assembly by Boothby et al. (2015)	gi_957787848_gb_LMYF01000332_1_Hypsibius_dujardini_scaffold406	RecA	4.2e-29
	Raw assembly by Boothby et al. (2015)	gi_957786798_gb_LMYF01001382_1_Hypsibius_dujardini_scaffold1545	RNA_pol_Rpb2_6	1.1e-41
	Raw assembly by Boothby et al. (2015)	gi_957781758_gb_LMYF01006422_1_Hypsibius_dujardini_scaffold6836	Ribosomal_S15	1.2e-28
	Raw assembly by Boothby et al. (2015)	gi_957782677_gb_LMYF01005503_1_Hypsibius_dujardini_scaffold5855	Ribosomal_S2	6.5e-84
	Raw assembly by Boothby et al. (2015)	gi_957778981_gb_LMYF01009199_1_Hypsibius_dujardini_scaffold10105	Oligomerisation	8e-10
	Raw assembly by Boothby et al. (2015)	gi_957785717_gb_LMYF01002463_1_Hypsibius_dujardini_scaffold2670	Ribosomal_L17	1.1e-34
	Raw assembly by Boothby et al. (2015)	gi_957783765_gb_LMYF01004415_1_Hypsibius_dujardini_scaffold4718	Ribosomal_S5	8.8e-26
	Raw assembly by Boothby et al. (2015)	gi_957788121_gb_LMYF01000059_1_Hypsibius_dujardini_scaffold75	THF_DHG_CYH	2.3e-43
	Raw assembly by Boothby et al. (2015)	gi_957786679_gb_LMYF01001501_1_Hypsibius_dujardini_scaffold1669	PseudoU_synth_1	3e-14
	Raw assembly by Boothby et al. (2015)	gi_957779021_gb_LMYF01009159_1_Hypsibius_dujardini_scaffold10050	Ribosomal_L27	2.4e-38
	Raw assembly by Boothby et al. (2015)	gi_957785333_gb_LMYF01002847_1_Hypsibius_dujardini_scaffold3072	dsrm	1.7e-13
	Raw assembly by Boothby et al. (2015)	gi_957783765_gb_LMYF01004415_1_Hypsibius_dujardini_scaffold4718	Ribosomal_L5_C	8.3e-31
	Raw assembly by Boothby et al. (2015)	gi_957786188_gb_LMYF01001992_1_Hypsibius_dujardini_scaffold2188	SecG	3e-22
	Raw assembly by Boothby et al. (2015)	gi_957783711_gb_LMYF01004469_1_Hypsibius_dujardini_scaffold4775	Pept_tRNA_hydro	2.6e-55
	Raw assembly by Boothby et al. (2015)	gi_957785717_gb_LMYF01002463_1_Hypsibius_dujardini_scaffold2670	Ribosomal_S4	1.1e-23
	Raw assembly by Boothby et al. (2015)	gi_957772573_gb_LMYF01012026_1_Hypsibius_dujardini_scaffold13557	RecR	3e-16
	Raw assembly by Boothby et al. (2015)	gi_957783765_gb_LMYF01004415_1_Hypsibius_dujardini_scaffold4718	Ribosomal_S8	3.4e-44
	Raw assembly by Boothby et al. (2015)	gi_957774646_gb_LMYF01009953_1_Hypsibius_dujardini_scaffold11045	IF2_N	1.9e-10
	Raw assembly by Boothby et al. (2015)	gi_957786702_gb_LMYF01001478_1_Hypsibius_dujardini_scaffold1646	Ribosomal_L2	7.2e-12
	Raw assembly by Boothby et al. (2015)	gi_957785717_gb_LMYF01002463_1_Hypsibius_dujardini_scaffold2670	RNA_pol_L	2.6e-23
	Raw assembly by Boothby et al. (2015)	gi_957787850_gb_LMYF01000330_1_Hypsibius_dujardini_scaffold404	RNA_pol_A_CTD	1.6e-21
	Raw assembly by Boothby et al. (2015)	gi_957779904_gb_LMYF01008276_1_Hypsibius_dujardini_scaffold8972	zf-C4_ClpX	6.6e-24
	Raw assembly by Boothby et al. (2015)	gi_957788175_gb_LMYF01000005_1_Hypsibius_dujardini_scaffold5	TIM	2.2e-83
	Raw assembly by Boothby et al. (2015)	gi_957780139_gb_LMYF01008041_1_Hypsibius_dujardini_scaffold8686	Ribosomal_S17	5.9e-28
	Raw assembly by Boothby et al. (2015)	gi_957788171_gb_LMYF01000009_1_Hypsibius_dujardini_scaffold9	Arg_tRNA_synt_N	5.2e-10
	Raw assembly by Boothby et al. (2015)	gi_957763311_gb_LMYF01021288_1_Hypsibius_dujardini_scaffold24836	Ribosomal_L32p	8.7e-20
	Raw assembly by Boothby et al. (2015)	gi_957788175_gb_LMYF01000005_1_Hypsibius_dujardini_scaffold5	Ribosomal_L5	5.6e-21
	Raw assembly by Boothby et al. (2015)	gi_957765257_gb_LMYF01019342_1_Hypsibius_dujardini_scaffold22527	RNA_pol_Rpb1_5	1.3e-14
	Raw assembly by Boothby et al. (2015)	gi_957769735_gb_LMYF01014864_1_Hypsibius_dujardini_scaffold17068	GidB	2.3e-41
	Raw assembly by Boothby et al. (2015)	gi_957771956_gb_LMYF01012643_1_Hypsibius_dujardini_scaffold14329	Ribosomal_L27	2e-38
	Raw assembly by Boothby et al. (2015)	gi_957780139_gb_LMYF01008041_1_Hypsibius_dujardini_scaffold8686	Ribosomal_L18e	9.4e-32
	Raw assembly by Boothby et al. (2015)	gi_957788168_gb_LMYF01000012_1_Hypsibius_dujardini_scaffold14	Ribosomal_L18p	1.2e-36
	Raw assembly by Boothby et al. (2015)	gi_957788178_gb_LMYF01000002_1_Hypsibius_dujardini_scaffold2	IF3_C	1.4e-33
	Raw assembly by Boothby et al. (2015)	gi_957783832_gb_LMYF01004348_1_Hypsibius_dujardini_scaffold4649	GTP1_OBG	3.4e-19
	Raw assembly by Boothby et al. (2015)	gi_957788165_gb_LMYF01000015_1_Hypsibius_dujardini_scaffold17	CoaE	1e-25
	Raw assembly by Boothby et al. (2015)	gi_957780139_gb_LMYF01008041_1_Hypsibius_dujardini_scaffold8686	Ribosomal_S5_C	2.2e-31
	Raw assembly by Boothby et al. (2015)	gi_957788178_gb_LMYF01000002_1_Hypsibius_dujardini_scaffold2	SecG	3e-17
	Raw assembly by Boothby et al. (2015)	gi_957788177_gb_LMYF01000003_1_Hypsibius_dujardini_scaffold3	S-AdoMet_synt_C	1.6e-66
	Raw assembly by Boothby et al. (2015)	gi_957788079_gb_LMYF01000101_1_Hypsibius_dujardini_scaffold131	Phe_tRNA-synt_N	2.2e-12
	Raw assembly by Boothby et al. (2015)	gi_957781758_gb_LMYF01006422_1_Hypsibius_dujardini_scaffold6836	FAD_syn	5.7e-47
	Raw assembly by Boothby et al. (2015)	gi_957787984_gb_LMYF01000196_1_Hypsibius_dujardini_scaffold248	Methyltransf_5	4.1e-76
	Raw assembly by Boothby et al. (2015)	gi_957765534_gb_LMYF01019065_1_Hypsibius_dujardini_scaffold22192	SRP_SPB	3.4e-37
	Raw assembly by Boothby et al. (2015)	gi_957788177_gb_LMYF01000003_1_Hypsibius_dujardini_scaffold3	FAD_syn	4.5e-45
	Raw assembly by Boothby et al. (2015)	gi_957784155_gb_LMYF01004025_1_Hypsibius_dujardini_scaffold4314	Ribosomal_L2_C	2.6e-42
	Raw assembly by Boothby et al. (2015)	gi_957783147_gb_LMYF01005033_1_Hypsibius_dujardini_scaffold5364	GrpE	1e-45
	Raw assembly by Boothby et al. (2015)	gi_957781385_gb_LMYF01006795_1_Hypsibius_dujardini_scaffold7243	PseudoU_synth_1	1.7e-33
	Raw assembly by Boothby et al. (2015)	gi_957788177_gb_LMYF01000003_1_Hypsibius_dujardini_scaffold3	UvrC_HhH_N	1.1e-49
	Raw assembly by Boothby et al. (2015)	gi_957784155_gb_LMYF01004025_1_Hypsibius_dujardini_scaffold4314	Ribosomal_L22	3.6e-30
	Raw assembly by Boothby et al. (2015)	gi_957788171_gb_LMYF01000009_1_Hypsibius_dujardini_scaffold9	Val_tRNA-synt_C	3.8e-10
	Raw assembly by Boothby et al. (2015)	gi_957769267_gb_LMYF01015332_1_Hypsibius_dujardini_scaffold17627	Peptidase_A8	1.9e-23
	Raw assembly by Boothby et al. (2015)	gi_957783226_gb_LMYF01004954_1_Hypsibius_dujardini_scaffold5280	UPF0054	9.2e-32
	Raw assembly by Boothby et al. (2015)	gi_957765945_gb_LMYF01018654_1_Hypsibius_dujardini_scaffold21690	PGK	1.6e-148
	Raw assembly by Boothby et al. (2015)	gi_957787181_gb_LMYF01000999_1_Hypsibius_dujardini_scaffold1145	RNA_pol_Rpb2_7	2.8e-30
	Raw assembly by Boothby et al. (2015)	gi_957780139_gb_LMYF01008041_1_Hypsibius_dujardini_scaffold8686	Ribosomal_L5	1e-28
	Raw assembly by Boothby et al. (2015)	gi_957788168_gb_LMYF01000012_1_Hypsibius_dujardini_scaffold14	Ribosomal_S8	4.9e-49
	Raw assembly by Boothby et al. (2015)	gi_957786851_gb_LMYF01001329_1_Hypsibius_dujardini_scaffold1492	Enolase_N	4.8e-62
	Raw assembly by Boothby et al. (2015)	gi_957781248_gb_LMYF01006932_1_Hypsibius_dujardini_scaffold7404	Ribosomal_S19	1.7e-35
	Raw assembly by Boothby et al. (2015)	gi_957788174_gb_LMYF01000006_1_Hypsibius_dujardini_scaffold6	RNA_pol_Rpb2_1	9.4e-28
	Raw assembly by Boothby et al. (2015)	gi_957787183_gb_LMYF01000997_1_Hypsibius_dujardini_scaffold1143	Ribonuclease_P	1.3e-27
	Raw assembly by Boothby et al. (2015)	gi_957767709_gb_LMYF01016890_1_Hypsibius_dujardini_scaffold19557	UPF0054	1.2e-40
	Raw assembly by Boothby et al. (2015)	gi_957764375_gb_LMYF01020224_1_Hypsibius_dujardini_scaffold23573	DNA_pol3_beta_3	1.3e-27
	Raw assembly by Boothby et al. (2015)	gi_957781248_gb_LMYF01006932_1_Hypsibius_dujardini_scaffold7404	Ribosomal_L29	5.4e-18
	Raw assembly by Boothby et al. (2015)	gi_957779913_gb_LMYF01008267_1_Hypsibius_dujardini_scaffold8960	Ribosom_S12_S23	1.5e-59
	Raw assembly by Boothby et al. (2015)	gi_957768117_gb_LMYF01016482_1_Hypsibius_dujardini_scaffold19069	Ribosomal_S9	1.9e-49
	Raw assembly by Boothby et al. (2015)	gi_957785760_gb_LMYF01002420_1_Hypsibius_dujardini_scaffold2627	RuvA_C	4.4e-12
	Raw assembly by Boothby et al. (2015)	gi_957788179_gb_LMYF01000001_1_Hypsibius_dujardini_scaffold1	Ribosomal_L9_C	3.1e-21
	Raw assembly by Boothby et al. (2015)	gi_957772561_gb_LMYF01012038_1_Hypsibius_dujardini_scaffold13571	Val_tRNA-synt_C	5.2e-25
	Raw assembly by Boothby et al. (2015)	gi_957788174_gb_LMYF01000006_1_Hypsibius_dujardini_scaffold6	RNA_pol_Rpb2_45	4e-19
	Raw assembly by Boothby et al. (2015)	gi_957788178_gb_LMYF01000002_1_Hypsibius_dujardini_scaffold2	Ribosomal_L20	3.3e-44
	Raw assembly by Boothby et al. (2015)	gi_957767114_gb_LMYF01017485_1_Hypsibius_dujardini_scaffold20266	Enolase_C	6.1e-41
	Raw assembly by Boothby et al. (2015)	gi_957780139_gb_LMYF01008041_1_Hypsibius_dujardini_scaffold8686	Ribosomal_L6	3.1e-35
	Raw assembly by Boothby et al. (2015)	gi_957787781_gb_LMYF01000399_1_Hypsibius_dujardini_scaffold484	Enolase_N	9.5e-65
	Raw assembly by Boothby et al. (2015)	gi_957780554_gb_LMYF01007626_1_Hypsibius_dujardini_scaffold8196	Ribosomal_S15	3.9e-28
	Raw assembly by Boothby et al. (2015)	gi_957771700_gb_LMYF01012899_1_Hypsibius_dujardini_scaffold14644	PNPase	2.4e-20
	Raw assembly by Boothby et al. (2015)	gi_957787959_gb_LMYF01000221_1_Hypsibius_dujardini_scaffold277	RNA_pol_Rpb1_3	4.5e-24
	Raw assembly by Boothby et al. (2015)	gi_957764111_gb_LMYF01020488_1_Hypsibius_dujardini_scaffold23880	Seryl_tRNA_N	8.2e-30
	Raw assembly by Boothby et al. (2015)	gi_957788179_gb_LMYF01000001_1_Hypsibius_dujardini_scaffold1	Pept_tRNA_hydro	2e-57
	Raw assembly by Boothby et al. (2015)	gi_957786105_gb_LMYF01002075_1_Hypsibius_dujardini_scaffold2272	Ribosomal_S20p	4e-23
	Raw assembly by Boothby et al. (2015)	gi_957786993_gb_LMYF01001187_1_Hypsibius_dujardini_scaffold1342	Enolase_N	4.9e-18
	Raw assembly by Boothby et al. (2015)	gi_957786626_gb_LMYF01001554_1_Hypsibius_dujardini_scaffold1724	PGK	2.7e-25
	Raw assembly by Boothby et al. (2015)	gi_957781167_gb_LMYF01007013_1_Hypsibius_dujardini_scaffold7491	Ribosomal_L11_N	5.6e-32
	Raw assembly by Boothby et al. (2015)	gi_957770467_gb_LMYF01014132_1_Hypsibius_dujardini_scaffold16171	Peptidase_A8	1.3e-36
	Raw assembly by Boothby et al. (2015)	gi_957780170_gb_LMYF01008010_1_Hypsibius_dujardini_scaffold8652	Ribosomal_S13	5.6e-40
	Raw assembly by Boothby et al. (2015)	gi_957783833_gb_LMYF01004347_1_Hypsibius_dujardini_scaffold4648	tRNA-synt_2d	3.9e-63
	Raw assembly by Boothby et al. (2015)	gi_957771407_gb_LMYF01013192_1_Hypsibius_dujardini_scaffold15016	RuvA_N	2.3e-17
	Raw assembly by Boothby et al. (2015)	gi_957773657_gb_LMYF01010942_1_Hypsibius_dujardini_scaffold12246	Ribosomal_L6	3e-41
	Raw assembly by Boothby et al. (2015)	gi_957788179_gb_LMYF01000001_1_Hypsibius_dujardini_scaffold1	RuvA_N	3.6e-19
	Raw assembly by Boothby et al. (2015)	gi_957787843_gb_LMYF01000337_1_Hypsibius_dujardini_scaffold411	RNA_pol_Rpb1_1	1.4e-14
	Raw assembly by Boothby et al. (2015)	gi_957786163_gb_LMYF01002017_1_Hypsibius_dujardini_scaffold2213	tRNA_m1G_MT	3e-15
	Raw assembly by Boothby et al. (2015)	gi_957784448_gb_LMYF01003732_1_Hypsibius_dujardini_scaffold4004	UvrB	1e-23
	Raw assembly by Boothby et al. (2015)	gi_957788179_gb_LMYF01000001_1_Hypsibius_dujardini_scaffold1	Ribosomal_L5	3.1e-17
	Raw assembly by Boothby et al. (2015)	gi_957783000_gb_LMYF01005180_1_Hypsibius_dujardini_scaffold5517	UBA	1.2e-11
	Raw assembly by Boothby et al. (2015)	gi_957772831_gb_LMYF01011768_1_Hypsibius_dujardini_scaffold13247	Ribosomal_L20	1.5e-36
	Raw assembly by Boothby et al. (2015)	gi_957773027_gb_LMYF01011572_1_Hypsibius_dujardini_scaffold13017	Ribosomal_S13	2e-38
	Raw assembly by Boothby et al. (2015)	gi_957788179_gb_LMYF01000001_1_Hypsibius_dujardini_scaffold1	Ribosomal_S8	3.6e-50
	Raw assembly by Boothby et al. (2015)	gi_957774652_gb_LMYF01009947_1_Hypsibius_dujardini_scaffold11038	LepA_C	2e-51
	Raw assembly by Boothby et al. (2015)	gi_957772582_gb_LMYF01012017_1_Hypsibius_dujardini_scaffold13546	SRP_SPB	1.1e-34
	Raw assembly by Boothby et al. (2015)	gi_957788174_gb_LMYF01000006_1_Hypsibius_dujardini_scaffold6	RNA_pol_Rpb1_5	1.9e-60
	Raw assembly by Boothby et al. (2015)	gi_957780838_gb_LMYF01007342_1_Hypsibius_dujardini_scaffold7861	Trigger_N	1.3e-32
	Raw assembly by Boothby et al. (2015)	gi_957780139_gb_LMYF01008041_1_Hypsibius_dujardini_scaffold8686	SecY	6.8e-105
	Raw assembly by Boothby et al. (2015)	gi_957788174_gb_LMYF01000006_1_Hypsibius_dujardini_scaffold6	RNA_pol_Rpb1_3	1.7e-17
	Raw assembly by Boothby et al. (2015)	gi_957769108_gb_LMYF01015491_1_Hypsibius_dujardini_scaffold17821	THF_DHG_CYH	3e-40
	Raw assembly by Boothby et al. (2015)	gi_957788179_gb_LMYF01000001_1_Hypsibius_dujardini_scaffold1	Ribosomal_S6	2.2e-26
	Raw assembly by Boothby et al. (2015)	gi_957781548_gb_LMYF01006632_1_Hypsibius_dujardini_scaffold7061	RNA_pol_Rpb2_7	2.8e-30
	Raw assembly by Boothby et al. (2015)	gi_957781548_gb_LMYF01006632_1_Hypsibius_dujardini_scaffold7061	RNA_pol_Rpb2_6	2.4e-11
	Raw assembly by Boothby et al. (2015)	gi_957788159_gb_LMYF01000021_1_Hypsibius_dujardini_scaffold23	Ribosomal_L28	2e-33
	Raw assembly by Boothby et al. (2015)	gi_957772164_gb_LMYF01012435_1_Hypsibius_dujardini_scaffold14072	UPF0054	7.1e-42
	Raw assembly by Boothby et al. (2015)	gi_957770029_gb_LMYF01014570_1_Hypsibius_dujardini_scaffold16703	DNA_pol3_beta_2	8.4e-41
	Raw assembly by Boothby et al. (2015)	gi_957786296_gb_LMYF01001884_1_Hypsibius_dujardini_scaffold2074	Ribosomal_L14	1.5e-20
	Raw assembly by Boothby et al. (2015)	gi_957787993_gb_LMYF01000187_1_Hypsibius_dujardini_scaffold237	Ribosomal_L35p	9.1e-23
	Raw assembly by Boothby et al. (2015)	gi_957769393_gb_LMYF01015206_1_Hypsibius_dujardini_scaffold17481	Ribosomal_L2	1.2e-33
	Raw assembly by Boothby et al. (2015)	gi_957767763_gb_LMYF01016836_1_Hypsibius_dujardini_scaffold19495	dsrm	1.4e-10
	Raw assembly by Boothby et al. (2015)	gi_957773629_gb_LMYF01010970_1_Hypsibius_dujardini_scaffold12284	Ribosomal_L2_C	1.7e-59
	Raw assembly by Boothby et al. (2015)	gi_957766863_gb_LMYF01017736_1_Hypsibius_dujardini_scaffold20561	DNA_pol3_beta_2	1.3e-12
	Raw assembly by Boothby et al. (2015)	gi_957768296_gb_LMYF01016303_1_Hypsibius_dujardini_scaffold18835	RNA_pol_Rpb1_1	4.9e-101
	Raw assembly by Boothby et al. (2015)	gi_957773629_gb_LMYF01010970_1_Hypsibius_dujardini_scaffold12284	Ribosomal_L22	1.1e-31
	Raw assembly by Boothby et al. (2015)	gi_957788159_gb_LMYF01000021_1_Hypsibius_dujardini_scaffold23	TIM	2.5e-87
	Raw assembly by Boothby et al. (2015)	gi_957772164_gb_LMYF01012435_1_Hypsibius_dujardini_scaffold14072	S-AdoMet_synt_C	1.7e-61
	Raw assembly by Boothby et al. (2015)	gi_957764885_gb_LMYF01019714_1_Hypsibius_dujardini_scaffold22961	RNA_pol_A_CTD	2.3e-43
	Raw assembly by Boothby et al. (2015)	gi_957767133_gb_LMYF01017466_1_Hypsibius_dujardini_scaffold20243	DNA_pol3_beta_3	1e-09
	Raw assembly by Boothby et al. (2015)	gi_957787843_gb_LMYF01000337_1_Hypsibius_dujardini_scaffold411	RNA_pol_Rpb1_4	1.8e-10
	Raw assembly by Boothby et al. (2015)	gi_957766983_gb_LMYF01017616_1_Hypsibius_dujardini_scaffold20423	RNA_pol_Rpb2_6	2.4e-19
	Raw assembly by Boothby et al. (2015)	gi_957766389_gb_LMYF01018210_1_Hypsibius_dujardini_scaffold21146	Cons_hypoth95	1.3e-40
	Raw assembly by Boothby et al. (2015)	gi_957783370_gb_LMYF01004810_1_Hypsibius_dujardini_scaffold5130	Ribosomal_L1	1.3e-11
	Raw assembly by Boothby et al. (2015)	gi_957787900_gb_LMYF01000280_1_Hypsibius_dujardini_scaffold345	GrpE	5.7e-42
	Raw assembly by Boothby et al. (2015)	gi_957773629_gb_LMYF01010970_1_Hypsibius_dujardini_scaffold12284	Ribosomal_L16	3.2e-49
	Raw assembly by Boothby et al. (2015)	gi_957780594_gb_LMYF01007586_1_Hypsibius_dujardini_scaffold8144	RNA_pol_Rpb2_6	1.4e-24
	Raw assembly by Boothby et al. (2015)	gi_957788179_gb_LMYF01000001_1_Hypsibius_dujardini_scaffold1	Ribosomal_L6	8e-44
	Raw assembly by Boothby et al. (2015)	gi_957787397_gb_LMYF01000783_1_Hypsibius_dujardini_scaffold914	Cytidylate_kin	2.3e-44
	Raw assembly by Boothby et al. (2015)	gi_957787850_gb_LMYF01000330_1_Hypsibius_dujardini_scaffold404	Ribosomal_S9	2.4e-42
	Raw assembly by Boothby et al. (2015)	gi_957780594_gb_LMYF01007586_1_Hypsibius_dujardini_scaffold8144	RNA_pol_Rpb2_3	6.3e-25
	Raw assembly by Boothby et al. (2015)	gi_957788179_gb_LMYF01000001_1_Hypsibius_dujardini_scaffold1	Ribosomal_S5	4.5e-31
	Raw assembly by Boothby et al. (2015)	gi_957788175_gb_LMYF01000005_1_Hypsibius_dujardini_scaffold5	TruB_N	1.2e-56
	Raw assembly by Boothby et al. (2015)	gi_957773629_gb_LMYF01010970_1_Hypsibius_dujardini_scaffold12284	Ribosomal_L2	1.3e-32
	Raw assembly by Boothby et al. (2015)	gi_957787959_gb_LMYF01000221_1_Hypsibius_dujardini_scaffold277	RNA_pol_Rpb1_1	8.1e-90
	Raw assembly by Boothby et al. (2015)	gi_957779044_gb_LMYF01009136_1_Hypsibius_dujardini_scaffold10021	Ribosomal_L13	1.1e-50
	Raw assembly by Boothby et al. (2015)	gi_957783163_gb_LMYF01005017_1_Hypsibius_dujardini_scaffold5348	SecE	2e-17
	Raw assembly by Boothby et al. (2015)	gi_957785534_gb_LMYF01002646_1_Hypsibius_dujardini_scaffold2859	Ribosomal_L3	5e-27
	Raw assembly by Boothby et al. (2015)	gi_957780594_gb_LMYF01007586_1_Hypsibius_dujardini_scaffold8144	RNA_pol_Rpb2_1	1.4e-28
	Raw assembly by Boothby et al. (2015)	gi_957788179_gb_LMYF01000001_1_Hypsibius_dujardini_scaffold1	Ribosomal_L18e	2.3e-28
	Raw assembly by Boothby et al. (2015)	gi_957785594_gb_LMYF01002586_1_Hypsibius_dujardini_scaffold2796	CoaE	1.5e-59
	Raw assembly by Boothby et al. (2015)	gi_957788175_gb_LMYF01000005_1_Hypsibius_dujardini_scaffold5	GMP_synt_C	9.8e-39
	Raw assembly by Boothby et al. (2015)	gi_957774646_gb_LMYF01009953_1_Hypsibius_dujardini_scaffold11045	IF-2	2.2e-34
	Raw assembly by Boothby et al. (2015)	gi_957769108_gb_LMYF01015491_1_Hypsibius_dujardini_scaffold17821	THF_DHG_CYH_C	5.4e-11
	Raw assembly by Boothby et al. (2015)	gi_957767304_gb_LMYF01017295_1_Hypsibius_dujardini_scaffold20039	UvrB	7e-25
	Raw assembly by Boothby et al. (2015)	gi_957774352_gb_LMYF01010247_1_Hypsibius_dujardini_scaffold11407	SecE	3.7e-14
	Raw assembly by Boothby et al. (2015)	gi_957770617_gb_LMYF01013982_1_Hypsibius_dujardini_scaffold15984	YchF-GTPase_C	5.7e-44
	Raw assembly by Boothby et al. (2015)	gi_957782593_gb_LMYF01005587_1_Hypsibius_dujardini_scaffold5944	IF3_C	7.1e-10
	Raw assembly by Boothby et al. (2015)	gi_957786536_gb_LMYF01001644_1_Hypsibius_dujardini_scaffold1819	Ribosomal_L28	6.8e-29
	Raw assembly by Boothby et al. (2015)	gi_957768296_gb_LMYF01016303_1_Hypsibius_dujardini_scaffold18835	RNA_pol_Rpb2_6	5.3e-166
	Raw assembly by Boothby et al. (2015)	gi_957785483_gb_LMYF01002697_1_Hypsibius_dujardini_scaffold2914	RNA_pol_Rpb2_3	3.6e-28
	Raw assembly by Boothby et al. (2015)	gi_957787171_gb_LMYF01001009_1_Hypsibius_dujardini_scaffold1155	S-AdoMet_synt_C	3.8e-62
	Raw assembly by Boothby et al. (2015)	gi_957788175_gb_LMYF01000005_1_Hypsibius_dujardini_scaffold5	Ribosomal_S17	8.6e-28
	Raw assembly by Boothby et al. (2015)	gi_957766895_gb_LMYF01017704_1_Hypsibius_dujardini_scaffold20521	PNPase	5e-10
	Raw assembly by Boothby et al. (2015)	gi_957772184_gb_LMYF01012415_1_Hypsibius_dujardini_scaffold14048	Toprim_N	6.4e-38
	Raw assembly by Boothby et al. (2015)	gi_957765063_gb_LMYF01019536_1_Hypsibius_dujardini_scaffold22751	Trigger_N	5.8e-38
	Raw assembly by Boothby et al. (2015)	gi_957782522_gb_LMYF01005658_1_Hypsibius_dujardini_scaffold6021	TIM	4.3e-95
	Raw assembly by Boothby et al. (2015)	gi_957785834_gb_LMYF01002346_1_Hypsibius_dujardini_scaffold2551	Ribosomal_L14	1.5e-20
	Raw assembly by Boothby et al. (2015)	gi_957765306_gb_LMYF01019293_1_Hypsibius_dujardini_scaffold22471	tRNA-synt_1d	2.8e-75
	Raw assembly by Boothby et al. (2015)	gi_957783987_gb_LMYF01004193_1_Hypsibius_dujardini_scaffold4490	GidB	4.8e-49
	Raw assembly by Boothby et al. (2015)	gi_957782452_gb_LMYF01005728_1_Hypsibius_dujardini_scaffold6094	RNA_pol_Rpb1_1	1.7e-10
	Raw assembly by Boothby et al. (2015)	gi_957783982_gb_LMYF01004198_1_Hypsibius_dujardini_scaffold4495	Ribosomal_L9_N	1.6e-21
	Raw assembly by Boothby et al. (2015)	gi_957788149_gb_LMYF01000031_1_Hypsibius_dujardini_scaffold37	Ribosomal_L27	4.2e-35
	Raw assembly by Boothby et al. (2015)	gi_957787502_gb_LMYF01000678_1_Hypsibius_dujardini_scaffold797	IF3_C	6.7e-33
	Raw assembly by Boothby et al. (2015)	gi_957781857_gb_LMYF01006323_1_Hypsibius_dujardini_scaffold6730	Ribosomal_S16	3.1e-25
	Raw assembly by Boothby et al. (2015)	gi_957781248_gb_LMYF01006932_1_Hypsibius_dujardini_scaffold7404	Ribosomal_L22	1.1e-28
	Raw assembly by Boothby et al. (2015)	gi_957787502_gb_LMYF01000678_1_Hypsibius_dujardini_scaffold797	Ribosomal_L35p	1.8e-23
	Raw assembly by Boothby et al. (2015)	gi_957773987_gb_LMYF01010612_1_Hypsibius_dujardini_scaffold11861	RNA_pol_Rpb1_5	2.4e-25
	Raw assembly by Boothby et al. (2015)	gi_957781857_gb_LMYF01006323_1_Hypsibius_dujardini_scaffold6730	tRNA_m1G_MT	5.8e-50
	Raw assembly by Boothby et al. (2015)	gi_957781568_gb_LMYF01006612_1_Hypsibius_dujardini_scaffold7041	Ribosomal_L18p	2.8e-37
	Raw assembly by Boothby et al. (2015)	gi_957780367_gb_LMYF01007813_1_Hypsibius_dujardini_scaffold8418	GMP_synt_C	9.3e-18
	Raw assembly by Boothby et al. (2015)	gi_957787278_gb_LMYF01000902_1_Hypsibius_dujardini_scaffold1041	dsrm	1.7e-18
	Raw assembly by Boothby et al. (2015)	gi_957786430_gb_LMYF01001750_1_Hypsibius_dujardini_scaffold1930	Ribosomal_L16	3e-10
	Raw assembly by Boothby et al. (2015)	gi_957788155_gb_LMYF01000025_1_Hypsibius_dujardini_scaffold28	CoaE	9e-43
	Raw assembly by Boothby et al. (2015)	gi_957787959_gb_LMYF01000221_1_Hypsibius_dujardini_scaffold277	RNA_pol_Rpb1_2	3.1e-53
	Raw assembly by Boothby et al. (2015)	gi_957788155_gb_LMYF01000025_1_Hypsibius_dujardini_scaffold28	Ribosomal_S16	3.1e-24
	Raw assembly by Boothby et al. (2015)	gi_957784464_gb_LMYF01003716_1_Hypsibius_dujardini_scaffold3987	FDX-ACB	6.5e-31
	Raw assembly by Boothby et al. (2015)	gi_957786431_gb_LMYF01001749_1_Hypsibius_dujardini_scaffold1929	Ribosomal_L29	4.1e-11
	Raw assembly by Boothby et al. (2015)	gi_957785594_gb_LMYF01002586_1_Hypsibius_dujardini_scaffold2796	Ribosomal_L27	2.7e-40
	Raw assembly by Boothby et al. (2015)	gi_957782452_gb_LMYF01005728_1_Hypsibius_dujardini_scaffold6094	RNA_pol_Rpb1_1	8.9e-10
	Raw assembly by Boothby et al. (2015)	gi_957773825_gb_LMYF01010774_1_Hypsibius_dujardini_scaffold12044	Methyltransf_5	5.6e-48
	Raw assembly by Boothby et al. (2015)	gi_957786480_gb_LMYF01001700_1_Hypsibius_dujardini_scaffold1877	UPF0054	2e-37
	Raw assembly by Boothby et al. (2015)	gi_957763329_gb_LMYF01021270_1_Hypsibius_dujardini_scaffold24816	Ribosomal_L21p	3.5e-28
	Raw assembly by Boothby et al. (2015)	gi_957774983_gb_LMYF01009616_1_Hypsibius_dujardini_scaffold10627	eIF-1a	8.9e-28
	Raw assembly by Boothby et al. (2015)	gi_957781725_gb_LMYF01006455_1_Hypsibius_dujardini_scaffold6871	Ribosomal_S11	5.1e-22
	Raw assembly by Boothby et al. (2015)	gi_957771962_gb_LMYF01012637_1_Hypsibius_dujardini_scaffold14321	RecR	8.3e-11
	Raw assembly by Boothby et al. (2015)	gi_957782238_gb_LMYF01005942_1_Hypsibius_dujardini_scaffold6316	THF_DHG_CYH_C	1.1e-16
	Raw assembly by Boothby et al. (2015)	gi_957788175_gb_LMYF01000005_1_Hypsibius_dujardini_scaffold5	Trigger_C	3.8e-27
	Raw assembly by Boothby et al. (2015)	gi_957785321_gb_LMYF01002859_1_Hypsibius_dujardini_scaffold3084	Ribosomal_L1	1e-11
	Raw assembly by Boothby et al. (2015)	gi_957773803_gb_LMYF01010796_1_Hypsibius_dujardini_scaffold12070	THF_DHG_CYH	1.2e-43
	Raw assembly by Boothby et al. (2015)	gi_957773657_gb_LMYF01010942_1_Hypsibius_dujardini_scaffold12246	Ribosomal_S8	9.2e-49
	Raw assembly by Boothby et al. (2015)	gi_957774793_gb_LMYF01009806_1_Hypsibius_dujardini_scaffold10860	Peptidase_A8	5e-35
	Raw assembly by Boothby et al. (2015)	gi_957784571_gb_LMYF01003609_1_Hypsibius_dujardini_scaffold3875	RNA_pol_Rpb2_6	1.4e-24
	Raw assembly by Boothby et al. (2015)	gi_957781770_gb_LMYF01006410_1_Hypsibius_dujardini_scaffold6823	RNA_pol_Rpb1_2	5.4e-53
	Raw assembly by Boothby et al. (2015)	gi_957773657_gb_LMYF01010942_1_Hypsibius_dujardini_scaffold12246	Ribosomal_L5_C	1e-41
	Raw assembly by Boothby et al. (2015)	gi_957784571_gb_LMYF01003609_1_Hypsibius_dujardini_scaffold3875	RNA_pol_Rpb2_3	6.3e-25
	Raw assembly by Boothby et al. (2015)	gi_957783956_gb_LMYF01004224_1_Hypsibius_dujardini_scaffold4521	IF2_N	1.4e-13
	Raw assembly by Boothby et al. (2015)	gi_957773027_gb_LMYF01011572_1_Hypsibius_dujardini_scaffold13017	eIF-1a	1.4e-27
	Raw assembly by Boothby et al. (2015)	gi_957769882_gb_LMYF01014717_1_Hypsibius_dujardini_scaffold16886	Ribosomal_S7	9.8e-65
	Raw assembly by Boothby et al. (2015)	gi_957770711_gb_LMYF01013888_1_Hypsibius_dujardini_scaffold15865	RecR	1.6e-17
	Raw assembly by Boothby et al. (2015)	gi_957772272_gb_LMYF01012327_1_Hypsibius_dujardini_scaffold13939	GidB	7.9e-42
	Raw assembly by Boothby et al. (2015)	gi_957773563_gb_LMYF01011036_1_Hypsibius_dujardini_scaffold12364	Toprim_N	5e-37
	Raw assembly by Boothby et al. (2015)	gi_957786470_gb_LMYF01001710_1_Hypsibius_dujardini_scaffold1887	Ribosomal_L11	7e-14
	Raw assembly by Boothby et al. (2015)	gi_957785369_gb_LMYF01002811_1_Hypsibius_dujardini_scaffold3033	THF_DHG_CYH_C	4e-15
	Raw assembly by Boothby et al. (2015)	gi_957787168_gb_LMYF01001012_1_Hypsibius_dujardini_scaffold1158	TruB_N	5.7e-55
	Raw assembly by Boothby et al. (2015)	gi_957783982_gb_LMYF01004198_1_Hypsibius_dujardini_scaffold4495	Ribosomal_S18	1.3e-26
	Raw assembly by Boothby et al. (2015)	gi_957780874_gb_LMYF01007306_1_Hypsibius_dujardini_scaffold7817	UPF0081	2.3e-35
	Raw assembly by Boothby et al. (2015)	gi_957782749_gb_LMYF01005431_1_Hypsibius_dujardini_scaffold5781	SecY	1.2e-20
	Raw assembly by Boothby et al. (2015)	gi_957770413_gb_LMYF01014186_1_Hypsibius_dujardini_scaffold16231	UPF0081	2e-40
	Raw assembly by Boothby et al. (2015)	gi_957782327_gb_LMYF01005853_1_Hypsibius_dujardini_scaffold6225	THF_DHG_CYH	1.4e-43
	Raw assembly by Boothby et al. (2015)	gi_957764736_gb_LMYF01019863_1_Hypsibius_dujardini_scaffold23142	Ribosomal_S4	1.2e-31
	Raw assembly by Boothby et al. (2015)	gi_957784902_gb_LMYF01003278_1_Hypsibius_dujardini_scaffold3525	Peptidase_A8	1.7e-37
	Raw assembly by Boothby et al. (2015)	gi_957786771_gb_LMYF01001409_1_Hypsibius_dujardini_scaffold1573	Ribosomal_S15	7.1e-10
	Raw assembly by Boothby et al. (2015)	gi_957768435_gb_LMYF01016164_1_Hypsibius_dujardini_scaffold18658	Ribosomal_L1	1.2e-45
	Raw assembly by Boothby et al. (2015)	gi_957780957_gb_LMYF01007223_1_Hypsibius_dujardini_scaffold7723	UPF0079	1.5e-30
	Raw assembly by Boothby et al. (2015)	gi_957762871_gb_LMYF01021728_1_Hypsibius_dujardini_scaffold25362	Ribosomal_S5_C	1.8e-29
	Raw assembly by Boothby et al. (2015)	gi_957768435_gb_LMYF01016164_1_Hypsibius_dujardini_scaffold18658	Ribosomal_L12	3.1e-30
	Raw assembly by Boothby et al. (2015)	gi_957781608_gb_LMYF01006572_1_Hypsibius_dujardini_scaffold6996	SecE	5.8e-19
	Raw assembly by Boothby et al. (2015)	gi_957762871_gb_LMYF01021728_1_Hypsibius_dujardini_scaffold25362	SecY	1e-100
	Raw assembly by Boothby et al. (2015)	gi_957781548_gb_LMYF01006632_1_Hypsibius_dujardini_scaffold7061	RNA_pol_Rpb2_3	9.4e-20
	Raw assembly by Boothby et al. (2015)	gi_957774326_gb_LMYF01010273_1_Hypsibius_dujardini_scaffold11444	Trigger_N	2e-41
	Raw assembly by Boothby et al. (2015)	gi_957788135_gb_LMYF01000045_1_Hypsibius_dujardini_scaffold56	dsrm	4.2e-17
	Raw assembly by Boothby et al. (2015)	gi_957781365_gb_LMYF01006815_1_Hypsibius_dujardini_scaffold7266	TruB_N	2.4e-11
	Raw assembly by Boothby et al. (2015)	gi_957762981_gb_LMYF01021618_1_Hypsibius_dujardini_scaffold25226	GidB	2.8e-41
	Raw assembly by Boothby et al. (2015)	gi_957786283_gb_LMYF01001897_1_Hypsibius_dujardini_scaffold2087	Enolase_C	2.8e-30
	Raw assembly by Boothby et al. (2015)	gi_957769090_gb_LMYF01015509_1_Hypsibius_dujardini_scaffold17842	Ribosomal_S7	2.4e-58
	Raw assembly by Boothby et al. (2015)	gi_957782977_gb_LMYF01005203_1_Hypsibius_dujardini_scaffold5540	PGK	1.2e-09
	Raw assembly by Boothby et al. (2015)	gi_957781770_gb_LMYF01006410_1_Hypsibius_dujardini_scaffold6823	RNA_pol_Rpb1_3	1.8e-24
	Raw assembly by Boothby et al. (2015)	gi_957784081_gb_LMYF01004099_1_Hypsibius_dujardini_scaffold4393	Cons_hypoth95	7e-40
	Raw assembly by Boothby et al. (2015)	gi_957781770_gb_LMYF01006410_1_Hypsibius_dujardini_scaffold6823	RNA_pol_Rpb2_6	3.7e-156
	Raw assembly by Boothby et al. (2015)	gi_957783956_gb_LMYF01004224_1_Hypsibius_dujardini_scaffold4521	NusA_N	1.3e-35
	Raw assembly by Boothby et al. (2015)	gi_957788100_gb_LMYF01000080_1_Hypsibius_dujardini_scaffold102	S-AdoMet_synt_M	3.6e-54
	Raw assembly by Boothby et al. (2015)	gi_957787012_gb_LMYF01001168_1_Hypsibius_dujardini_scaffold1321	PNPase	1.4e-15
	Raw assembly by Boothby et al. (2015)	gi_957781770_gb_LMYF01006410_1_Hypsibius_dujardini_scaffold6823	RNA_pol_Rpb2_7	1.9e-29
	Raw assembly by Boothby et al. (2015)	gi_957787654_gb_LMYF01000526_1_Hypsibius_dujardini_scaffold627	Ribosomal_S4	1.2e-21
	Raw assembly by Boothby et al. (2015)	gi_957788175_gb_LMYF01000005_1_Hypsibius_dujardini_scaffold5	IF-2	1.2e-39
	Raw assembly by Boothby et al. (2015)	gi_957768435_gb_LMYF01016164_1_Hypsibius_dujardini_scaffold18658	Ribosomal_L11_N	2.2e-33
	Raw assembly by Boothby et al. (2015)	gi_957781770_gb_LMYF01006410_1_Hypsibius_dujardini_scaffold6823	RNA_pol_Rpb2_1	2.5e-24
	Raw assembly by Boothby et al. (2015)	gi_957785505_gb_LMYF01002675_1_Hypsibius_dujardini_scaffold2891	THF_DHG_CYH_C	3.3e-68
	Raw assembly by Boothby et al. (2015)	gi_957783233_gb_LMYF01004947_1_Hypsibius_dujardini_scaffold5272	Ribosomal_L27	2.3e-09
	Raw assembly by Boothby et al. (2015)	gi_957768658_gb_LMYF01015941_1_Hypsibius_dujardini_scaffold18372	SecY	2.2e-99
	Raw assembly by Boothby et al. (2015)	gi_957788177_gb_LMYF01000003_1_Hypsibius_dujardini_scaffold3	UvrB	5.1e-22
	Raw assembly by Boothby et al. (2015)	gi_957788178_gb_LMYF01000002_1_Hypsibius_dujardini_scaffold2	Ribosomal_L27	1.7e-38
	Raw assembly by Boothby et al. (2015)	gi_957787528_gb_LMYF01000652_1_Hypsibius_dujardini_scaffold767	IF3_C	6.5e-10
	Raw assembly by Boothby et al. (2015)	gi_957783973_gb_LMYF01004207_1_Hypsibius_dujardini_scaffold4504	tRNA-synt_2d	5.2e-21
	Raw assembly by Boothby et al. (2015)	gi_957769485_gb_LMYF01015114_1_Hypsibius_dujardini_scaffold17372	RuvA_C	9.2e-13
	Raw assembly by Boothby et al. (2015)	gi_957766356_gb_LMYF01018243_1_Hypsibius_dujardini_scaffold21188	IPPT	5.8e-64
	Raw assembly by Boothby et al. (2015)	gi_957779200_gb_LMYF01008980_1_Hypsibius_dujardini_scaffold9840	Ribosomal_L1	6.5e-24
	Raw assembly by Boothby et al. (2015)	gi_957788079_gb_LMYF01000101_1_Hypsibius_dujardini_scaffold131	Ribonuclease_P	3.9e-22
	Raw assembly by Boothby et al. (2015)	gi_957769009_gb_LMYF01015590_1_Hypsibius_dujardini_scaffold17941	YchF-GTPase_C	1.7e-41
	Raw assembly by Boothby et al. (2015)	gi_957780594_gb_LMYF01007586_1_Hypsibius_dujardini_scaffold8144	RNA_pol_Rpb2_6	1.3e-14
	Raw assembly by Boothby et al. (2015)	gi_957788163_gb_LMYF01000017_1_Hypsibius_dujardini_scaffold19	Ribosomal_S11	1.8e-46
	Raw assembly by Boothby et al. (2015)	gi_957774815_gb_LMYF01009784_1_Hypsibius_dujardini_scaffold10835	Ribosomal_L35p	4.2e-26
	Raw assembly by Boothby et al. (2015)	gi_957770029_gb_LMYF01014570_1_Hypsibius_dujardini_scaffold16703	DNA_pol3_beta	1.6e-38
	Raw assembly by Boothby et al. (2015)	gi_957786835_gb_LMYF01001345_1_Hypsibius_dujardini_scaffold1508	PGK	2.7e-145
	Raw assembly by Boothby et al. (2015)	gi_957787715_gb_LMYF01000465_1_Hypsibius_dujardini_scaffold559	Methyltransf_5	1.1e-100
	Raw assembly by Boothby et al. (2015)	gi_957788174_gb_LMYF01000006_1_Hypsibius_dujardini_scaffold6	Cytidylate_kin	1.8e-47
	Raw assembly by Boothby et al. (2015)	gi_957774969_gb_LMYF01009630_1_Hypsibius_dujardini_scaffold10647	THF_DHG_CYH_C	4.2e-70
	Raw assembly by Boothby et al. (2015)	gi_957782391_gb_LMYF01005789_1_Hypsibius_dujardini_scaffold6160	PGK	2.1e-153
	Raw assembly by Boothby et al. (2015)	gi_957788174_gb_LMYF01000006_1_Hypsibius_dujardini_scaffold6	IF3_C	2.3e-31
	Raw assembly by Boothby et al. (2015)	gi_957784606_gb_LMYF01003574_1_Hypsibius_dujardini_scaffold3839	THF_DHG_CYH_C	1.6e-36
	Raw assembly by Boothby et al. (2015)	gi_957773471_gb_LMYF01011128_1_Hypsibius_dujardini_scaffold12478	Ribosomal_L35p	2e-16
	Raw assembly by Boothby et al. (2015)	gi_957788178_gb_LMYF01000002_1_Hypsibius_dujardini_scaffold2	Arg_tRNA_synt_N	5.2e-12
	Raw assembly by Boothby et al. (2015)	gi_957788163_gb_LMYF01000017_1_Hypsibius_dujardini_scaffold19	RNA_pol_L	8e-23
	Raw assembly by Boothby et al. (2015)	gi_957772931_gb_LMYF01011668_1_Hypsibius_dujardini_scaffold13136	Flavokinase	2.6e-40
	Raw assembly by Boothby et al. (2015)	gi_957788174_gb_LMYF01000006_1_Hypsibius_dujardini_scaffold6	Oligomerisation	3.4e-33
	Raw assembly by Boothby et al. (2015)	gi_957786688_gb_LMYF01001492_1_Hypsibius_dujardini_scaffold1660	SecG	2e-17
	Raw assembly by Boothby et al. (2015)	gi_957788178_gb_LMYF01000002_1_Hypsibius_dujardini_scaffold2	MurB_C	8.3e-25
	Raw assembly by Boothby et al. (2015)	gi_957788178_gb_LMYF01000002_1_Hypsibius_dujardini_scaffold2	UPF0081	7.1e-37
	Raw assembly by Boothby et al. (2015)	gi_957767287_gb_LMYF01017312_1_Hypsibius_dujardini_scaffold20058	UvrC_HhH_N	1.1e-55
	Raw assembly by Boothby et al. (2015)	gi_957780960_gb_LMYF01007220_1_Hypsibius_dujardini_scaffold7720	THF_DHG_CYH	3.8e-42
	Raw assembly by Boothby et al. (2015)	gi_957788179_gb_LMYF01000001_1_Hypsibius_dujardini_scaffold1	Ribosomal_L11	3.8e-29
	Raw assembly by Boothby et al. (2015)	gi_957788179_gb_LMYF01000001_1_Hypsibius_dujardini_scaffold1	Ribosomal_L17	1.6e-36
	Raw assembly by Boothby et al. (2015)	gi_957778995_gb_LMYF01009185_1_Hypsibius_dujardini_scaffold10085	Ribosomal_S17	8.1e-29
	Raw assembly by Boothby et al. (2015)	gi_957788168_gb_LMYF01000012_1_Hypsibius_dujardini_scaffold14	Ribosomal_L4	6.4e-61
	Raw assembly by Boothby et al. (2015)	gi_957787181_gb_LMYF01000999_1_Hypsibius_dujardini_scaffold1145	RNA_pol_Rpb2_6	1.3e-42
	Raw assembly by Boothby et al. (2015)	gi_957774815_gb_LMYF01009784_1_Hypsibius_dujardini_scaffold10835	RBFA	1.9e-26
	Raw assembly by Boothby et al. (2015)	gi_957782728_gb_LMYF01005452_1_Hypsibius_dujardini_scaffold5802	RNA_pol_Rpb2_6	2.4e-11
	Raw assembly by Boothby et al. (2015)	gi_957788149_gb_LMYF01000031_1_Hypsibius_dujardini_scaffold37	Ribosomal_L21p	6.3e-34
	Raw assembly by Boothby et al. (2015)	gi_957766905_gb_LMYF01017694_1_Hypsibius_dujardini_scaffold20511	UvrB	6e-25
	Raw assembly by Boothby et al. (2015)	gi_957782337_gb_LMYF01005843_1_Hypsibius_dujardini_scaffold6215	dsrm	1.1e-15
	Raw assembly by Boothby et al. (2015)	gi_957787502_gb_LMYF01000678_1_Hypsibius_dujardini_scaffold797	Trigger_N	1.9e-32
	Raw assembly by Boothby et al. (2015)	gi_957780358_gb_LMYF01007822_1_Hypsibius_dujardini_scaffold8430	Ribosomal_L19	1.9e-45
	Raw assembly by Boothby et al. (2015)	gi_957778995_gb_LMYF01009185_1_Hypsibius_dujardini_scaffold10085	Ribosomal_L22	3e-35
	Raw assembly by Boothby et al. (2015)	gi_957782728_gb_LMYF01005452_1_Hypsibius_dujardini_scaffold5802	RNA_pol_Rpb2_6	2.8e-68
	Raw assembly by Boothby et al. (2015)	gi_957788175_gb_LMYF01000005_1_Hypsibius_dujardini_scaffold5	Enolase_C	6.4e-125
	Raw assembly by Boothby et al. (2015)	gi_957773200_gb_LMYF01011399_1_Hypsibius_dujardini_scaffold12808	Seryl_tRNA_N	3.1e-32
	Raw assembly by Boothby et al. (2015)	gi_957769666_gb_LMYF01014933_1_Hypsibius_dujardini_scaffold17147	GMP_synt_C	1.1e-42
	Raw assembly by Boothby et al. (2015)	gi_957788175_gb_LMYF01000005_1_Hypsibius_dujardini_scaffold5	Ribosomal_L1	1.2e-42
	Raw assembly by Boothby et al. (2015)	gi_957788177_gb_LMYF01000003_1_Hypsibius_dujardini_scaffold3	Ribosomal_S11	5.3e-49
	Raw assembly by Boothby et al. (2015)	gi_957783835_gb_LMYF01004345_1_Hypsibius_dujardini_scaffold4646	B5	2.6e-16
	Raw assembly by Boothby et al. (2015)	gi_957781774_gb_LMYF01006406_1_Hypsibius_dujardini_scaffold6818	Ribosomal_L11	3.6e-27
	Raw assembly by Boothby et al. (2015)	gi_957765168_gb_LMYF01019431_1_Hypsibius_dujardini_scaffold22631	Ribosomal_L32p	4.9e-17
	Raw assembly by Boothby et al. (2015)	gi_957788179_gb_LMYF01000001_1_Hypsibius_dujardini_scaffold1	RNA_pol_A_CTD	1.5e-27
	Raw assembly by Boothby et al. (2015)	gi_957780170_gb_LMYF01008010_1_Hypsibius_dujardini_scaffold8652	RNA_pol_A_CTD	1.6e-24
	Raw assembly by Boothby et al. (2015)	gi_957788177_gb_LMYF01000003_1_Hypsibius_dujardini_scaffold3	UPF0081	3.4e-31
	Raw assembly by Boothby et al. (2015)	gi_957788174_gb_LMYF01000006_1_Hypsibius_dujardini_scaffold6	Ribosomal_L20	3.8e-45
	Raw assembly by Boothby et al. (2015)	gi_957783970_gb_LMYF01004210_1_Hypsibius_dujardini_scaffold4507	Enolase_C	3.1e-125
	Raw assembly by Boothby et al. (2015)	gi_957779614_gb_LMYF01008566_1_Hypsibius_dujardini_scaffold9330	Flavokinase	1.2e-40
	Raw assembly by Boothby et al. (2015)	gi_957788173_gb_LMYF01000007_1_Hypsibius_dujardini_scaffold7	Competence	4.7e-63
	Raw assembly by Boothby et al. (2015)	gi_957772778_gb_LMYF01011821_1_Hypsibius_dujardini_scaffold13312	CTP_synth_N	6e-100
	Raw assembly by Boothby et al. (2015)	gi_957788175_gb_LMYF01000005_1_Hypsibius_dujardini_scaffold5	Trigger_N	2.3e-35
	Raw assembly by Boothby et al. (2015)	gi_957780132_gb_LMYF01008048_1_Hypsibius_dujardini_scaffold8693	Ribosomal_L11	6.9e-29
	Raw assembly by Boothby et al. (2015)	gi_957774884_gb_LMYF01009715_1_Hypsibius_dujardini_scaffold10750	Pept_tRNA_hydro	2.5e-57
	Raw assembly by Boothby et al. (2015)	gi_957788179_gb_LMYF01000001_1_Hypsibius_dujardini_scaffold1	Ribosomal_S13	1.6e-38
	Raw assembly by Boothby et al. (2015)	gi_957788175_gb_LMYF01000005_1_Hypsibius_dujardini_scaffold5	UPF0079	3.2e-30
	Raw assembly by Boothby et al. (2015)	gi_957781248_gb_LMYF01006932_1_Hypsibius_dujardini_scaffold7404	Ribosom_S12_S23	1.9e-59
	Raw assembly by Boothby et al. (2015)	gi_957788030_gb_LMYF01000150_1_Hypsibius_dujardini_scaffold192	Trigger_N	2.4e-35
	Raw assembly by Boothby et al. (2015)	gi_957788179_gb_LMYF01000001_1_Hypsibius_dujardini_scaffold1	GTP1_OBG	8.2e-49
	Raw assembly by Boothby et al. (2015)	gi_957788177_gb_LMYF01000003_1_Hypsibius_dujardini_scaffold3	PNPase	4.7e-12
	Raw assembly by Boothby et al. (2015)	gi_957768235_gb_LMYF01016364_1_Hypsibius_dujardini_scaffold18915	DNA_pol3_beta_2	1.5e-25
	Raw assembly by Boothby et al. (2015)	gi_957788175_gb_LMYF01000005_1_Hypsibius_dujardini_scaffold5	Ribosomal_L21p	3.2e-32
	Raw assembly by Boothby et al. (2015)	gi_957766895_gb_LMYF01017704_1_Hypsibius_dujardini_scaffold20521	Ribosomal_S15	3e-26
	Raw assembly by Boothby et al. (2015)	gi_957788179_gb_LMYF01000001_1_Hypsibius_dujardini_scaffold1	IF2_N	4.3e-18
	Raw assembly by Boothby et al. (2015)	gi_957781568_gb_LMYF01006612_1_Hypsibius_dujardini_scaffold7041	Ribosomal_L4	8.3e-65
	Raw assembly by Boothby et al. (2015)	gi_957780159_gb_LMYF01008021_1_Hypsibius_dujardini_scaffold8663	RNA_pol_Rpb1_3	3e-28
	Raw assembly by Boothby et al. (2015)	gi_957781568_gb_LMYF01006612_1_Hypsibius_dujardini_scaffold7041	Ribosomal_S10	1.9e-39
	Raw assembly by Boothby et al. (2015)	gi_957780159_gb_LMYF01008021_1_Hypsibius_dujardini_scaffold8663	RNA_pol_Rpb1_5	1.5e-66
	Raw assembly by Boothby et al. (2015)	gi_957788179_gb_LMYF01000001_1_Hypsibius_dujardini_scaffold1	Ribosomal_L13	5.8e-56
	Raw assembly by Boothby et al. (2015)	gi_957773471_gb_LMYF01011128_1_Hypsibius_dujardini_scaffold12478	Ribosomal_L20	2.4e-48
	Raw assembly by Boothby et al. (2015)	gi_957779803_gb_LMYF01008377_1_Hypsibius_dujardini_scaffold9099	RNA_pol_Rpb2_6	1.7e-26
	Raw assembly by Boothby et al. (2015)	gi_957788173_gb_LMYF01000007_1_Hypsibius_dujardini_scaffold7	Ribosomal_L13	2.4e-54
	Raw assembly by Boothby et al. (2015)	gi_957779803_gb_LMYF01008377_1_Hypsibius_dujardini_scaffold9099	RNA_pol_Rpb2_6	1.5e-14
	Raw assembly by Boothby et al. (2015)	gi_957779913_gb_LMYF01008267_1_Hypsibius_dujardini_scaffold8960	Ribosomal_S7	3.8e-56
	Raw assembly by Boothby et al. (2015)	gi_957773657_gb_LMYF01010942_1_Hypsibius_dujardini_scaffold12246	Ribosomal_S3_C	1.7e-34
	Raw assembly by Boothby et al. (2015)	gi_957788179_gb_LMYF01000001_1_Hypsibius_dujardini_scaffold1	Ribosomal_L23	1.4e-27
	Raw assembly by Boothby et al. (2015)	gi_957768117_gb_LMYF01016482_1_Hypsibius_dujardini_scaffold19069	Ribosomal_L13	1.9e-56
	Raw assembly by Boothby et al. (2015)	gi_957788168_gb_LMYF01000012_1_Hypsibius_dujardini_scaffold14	Ribosomal_L2_C	5.9e-55
	Raw assembly by Boothby et al. (2015)	gi_957773657_gb_LMYF01010942_1_Hypsibius_dujardini_scaffold12246	Ribosomal_L29	4.7e-20
	Raw assembly by Boothby et al. (2015)	gi_957780754_gb_LMYF01007426_1_Hypsibius_dujardini_scaffold7957	GAD	9.7e-11
	Raw assembly by Boothby et al. (2015)	gi_957787771_gb_LMYF01000409_1_Hypsibius_dujardini_scaffold495	Phe_tRNA-synt_N	5.5e-11
	Raw assembly by Boothby et al. (2015)	gi_957788168_gb_LMYF01000012_1_Hypsibius_dujardini_scaffold14	Ribosomal_S17	1.4e-33
	Raw assembly by Boothby et al. (2015)	gi_957780132_gb_LMYF01008048_1_Hypsibius_dujardini_scaffold8693	RNA_pol_Rpb2_45	2.2e-23
	Raw assembly by Boothby et al. (2015)	gi_957781774_gb_LMYF01006406_1_Hypsibius_dujardini_scaffold6818	Ribosomal_L1	1e-50
	Raw assembly by Boothby et al. (2015)	gi_957788179_gb_LMYF01000001_1_Hypsibius_dujardini_scaffold1	Ribosomal_L22	1.6e-30
	Raw assembly by Boothby et al. (2015)	gi_957788168_gb_LMYF01000012_1_Hypsibius_dujardini_scaffold14	Ribosomal_L16	4.6e-52
	Raw assembly by Boothby et al. (2015)	gi_957786638_gb_LMYF01001542_1_Hypsibius_dujardini_scaffold1712	Ribosomal_L5	9.2e-16
	Raw assembly by Boothby et al. (2015)	gi_957763789_gb_LMYF01020810_1_Hypsibius_dujardini_scaffold24268	PNPase	9.8e-13
	Raw assembly by Boothby et al. (2015)	gi_957769882_gb_LMYF01014717_1_Hypsibius_dujardini_scaffold16886	RNA_pol_Rpb1_5	1.7e-22
	Raw assembly by Boothby et al. (2015)	gi_957781608_gb_LMYF01006572_1_Hypsibius_dujardini_scaffold6996	Ribosomal_L1	3.8e-51
	Raw assembly by Boothby et al. (2015)	gi_957787774_gb_LMYF01000406_1_Hypsibius_dujardini_scaffold492	Ribosomal_L23	1.8e-18
	Raw assembly by Boothby et al. (2015)	gi_957787293_gb_LMYF01000887_1_Hypsibius_dujardini_scaffold1026	Pept_tRNA_hydro	7.2e-69
	Raw assembly by Boothby et al. (2015)	gi_957788173_gb_LMYF01000007_1_Hypsibius_dujardini_scaffold7	Ribosomal_S2	5e-79
	Raw assembly by Boothby et al. (2015)	gi_957774476_gb_LMYF01010123_1_Hypsibius_dujardini_scaffold11258	Ribosomal_L18e	1.4e-23
	Raw assembly by Boothby et al. (2015)	gi_957773793_gb_LMYF01010806_1_Hypsibius_dujardini_scaffold12083	Enolase_N	5.5e-62
	Raw assembly by Boothby et al. (2015)	gi_957783001_gb_LMYF01005179_1_Hypsibius_dujardini_scaffold5516	Ribosomal_L11	1.8e-28
	Raw assembly by Boothby et al. (2015)	gi_957774476_gb_LMYF01010123_1_Hypsibius_dujardini_scaffold11258	Ribosomal_S5	7.8e-27
	Raw assembly by Boothby et al. (2015)	gi_957786374_gb_LMYF01001806_1_Hypsibius_dujardini_scaffold1990	Ribosomal_L14	1.5e-20
	Raw assembly by Boothby et al. (2015)	gi_957784464_gb_LMYF01003716_1_Hypsibius_dujardini_scaffold3987	B5	1.1e-18
	Raw assembly by Boothby et al. (2015)	gi_957788170_gb_LMYF01000010_1_Hypsibius_dujardini_scaffold10	RecA	8.9e-167
	Raw assembly by Boothby et al. (2015)	gi_957779692_gb_LMYF01008488_1_Hypsibius_dujardini_scaffold9239	RBFA	8.1e-31
	Raw assembly by Boothby et al. (2015)	gi_957788174_gb_LMYF01000006_1_Hypsibius_dujardini_scaffold6	RecR	1.7e-16
	Raw assembly by Boothby et al. (2015)	gi_957780170_gb_LMYF01008010_1_Hypsibius_dujardini_scaffold8652	RNA_pol_A_bac	8.4e-19
	Raw assembly by Boothby et al. (2015)	gi_957764858_gb_LMYF01019741_1_Hypsibius_dujardini_scaffold22993	RecA	1.6e-131
	Raw assembly by Boothby et al. (2015)	gi_957780132_gb_LMYF01008048_1_Hypsibius_dujardini_scaffold8693	RNA_pol_Rpb2_7	3.6e-30
	Raw assembly by Boothby et al. (2015)	gi_957768567_gb_LMYF01016032_1_Hypsibius_dujardini_scaffold18492	PNPase	1.1e-09
	Raw assembly by Boothby et al. (2015)	gi_957779692_gb_LMYF01008488_1_Hypsibius_dujardini_scaffold9239	IF-2	4.7e-40
	Raw assembly by Boothby et al. (2015)	gi_957773922_gb_LMYF01010677_1_Hypsibius_dujardini_scaffold11939	RNA_pol_Rpb1_2	2.9e-35
	Raw assembly by Boothby et al. (2015)	gi_957787658_gb_LMYF01000522_1_Hypsibius_dujardini_scaffold622	THF_DHG_CYH_C	1.3e-67
	Raw assembly by Boothby et al. (2015)	gi_957788177_gb_LMYF01000003_1_Hypsibius_dujardini_scaffold3	Ribosomal_S9	3.5e-47
	Raw assembly by Boothby et al. (2015)	gi_957783409_gb_LMYF01004771_1_Hypsibius_dujardini_scaffold5091	SmpB	3.5e-23
	Raw assembly by Boothby et al. (2015)	gi_957768235_gb_LMYF01016364_1_Hypsibius_dujardini_scaffold18915	DNA_pol3_beta_3	1.4e-25
	Raw assembly by Boothby et al. (2015)	gi_957787174_gb_LMYF01001006_1_Hypsibius_dujardini_scaffold1152	RNA_pol_Rpb2_6	1.1e-26
	Raw assembly by Boothby et al. (2015)	gi_957780629_gb_LMYF01007551_1_Hypsibius_dujardini_scaffold8103	Ribosomal_S4	5.4e-18
	Raw assembly by Boothby et al. (2015)	gi_957788168_gb_LMYF01000012_1_Hypsibius_dujardini_scaffold14	Ribosomal_L2	5.7e-32
	Raw assembly by Boothby et al. (2015)	gi_957788089_gb_LMYF01000091_1_Hypsibius_dujardini_scaffold115	FAD_syn	3.7e-42
	Raw assembly by Boothby et al. (2015)	gi_957773963_gb_LMYF01010636_1_Hypsibius_dujardini_scaffold11890	dsrm	1.3e-13
	Raw assembly by Boothby et al. (2015)	gi_957787174_gb_LMYF01001006_1_Hypsibius_dujardini_scaffold1152	RNA_pol_Rpb2_6	8.7e-42
	Raw assembly by Boothby et al. (2015)	gi_957774183_gb_LMYF01010416_1_Hypsibius_dujardini_scaffold11610	THF_DHG_CYH	1.1e-13
	Raw assembly by Boothby et al. (2015)	gi_957788082_gb_LMYF01000098_1_Hypsibius_dujardini_scaffold126	Val_tRNA-synt_C	5.6e-19
	Raw assembly by Boothby et al. (2015)	gi_957773922_gb_LMYF01010677_1_Hypsibius_dujardini_scaffold11939	RNA_pol_Rpb1_2	6.2e-25
	Raw assembly by Boothby et al. (2015)	gi_957775166_gb_LMYF01009433_1_Hypsibius_dujardini_scaffold10399	FDX-ACB	3e-30
	Raw assembly by Boothby et al. (2015)	gi_957774476_gb_LMYF01010123_1_Hypsibius_dujardini_scaffold11258	Ribosomal_L6	3.3e-43
	Raw assembly by Boothby et al. (2015)	gi_957787174_gb_LMYF01001006_1_Hypsibius_dujardini_scaffold1152	RNA_pol_Rpb2_2	4.7e-33
	Raw assembly by Boothby et al. (2015)	gi_957773823_gb_LMYF01010776_1_Hypsibius_dujardini_scaffold12046	Enolase_C	1.7e-27
	Raw assembly by Boothby et al. (2015)	gi_957787658_gb_LMYF01000522_1_Hypsibius_dujardini_scaffold622	RuvA_N	2.7e-21
	Raw assembly by Boothby et al. (2015)	gi_957773922_gb_LMYF01010677_1_Hypsibius_dujardini_scaffold11939	RNA_pol_Rpb1_3	7.2e-37
	Raw assembly by Boothby et al. (2015)	gi_957788169_gb_LMYF01000011_1_Hypsibius_dujardini_scaffold11	Peptidase_A8	6.1e-38
	Raw assembly by Boothby et al. (2015)	gi_957763803_gb_LMYF01020796_1_Hypsibius_dujardini_scaffold24250	Ribosomal_L27	2.1e-40
	Raw assembly by Boothby et al. (2015)	gi_957769881_gb_LMYF01014718_1_Hypsibius_dujardini_scaffold16887	Enolase_C	1.1e-30
	Raw assembly by Boothby et al. (2015)	gi_957780132_gb_LMYF01008048_1_Hypsibius_dujardini_scaffold8693	RNA_pol_Rpb2_6	4.2e-156
	Raw assembly by Boothby et al. (2015)	gi_957787959_gb_LMYF01000221_1_Hypsibius_dujardini_scaffold277	RNA_pol_Rpb2_1	4.4e-22
	Raw assembly by Boothby et al. (2015)	gi_957787268_gb_LMYF01000912_1_Hypsibius_dujardini_scaffold1052	Ribosomal_L32p	1.9e-17
	Raw assembly by Boothby et al. (2015)	gi_957787959_gb_LMYF01000221_1_Hypsibius_dujardini_scaffold277	Ribosomal_L10	8.1e-25
	Raw assembly by Boothby et al. (2015)	gi_957769090_gb_LMYF01015509_1_Hypsibius_dujardini_scaffold17842	Ribosom_S12_S23	5e-58
	Raw assembly by Boothby et al. (2015)	gi_957779847_gb_LMYF01008333_1_Hypsibius_dujardini_scaffold9046	Ribosomal_L19	7.8e-45
	Raw assembly by Boothby et al. (2015)	gi_957787213_gb_LMYF01000967_1_Hypsibius_dujardini_scaffold1112	Ribosomal_L3	1.3e-26
	Raw assembly by Boothby et al. (2015)	gi_957787959_gb_LMYF01000221_1_Hypsibius_dujardini_scaffold277	Ribosomal_L11_N	7e-33
	Raw assembly by Boothby et al. (2015)	gi_957768696_gb_LMYF01015903_1_Hypsibius_dujardini_scaffold18324	Ribosomal_L18e	2.2e-27
	Raw assembly by Boothby et al. (2015)	gi_957764872_gb_LMYF01019727_1_Hypsibius_dujardini_scaffold22976	PseudoU_synth_1	2.1e-33
	Raw assembly by Boothby et al. (2015)	gi_957786154_gb_LMYF01002026_1_Hypsibius_dujardini_scaffold2222	Trigger_N	1.2e-44
	Raw assembly by Boothby et al. (2015)	gi_957783648_gb_LMYF01004532_1_Hypsibius_dujardini_scaffold4843	YchF-GTPase_C	3.1e-41
	Raw assembly by Boothby et al. (2015)	gi_957788170_gb_LMYF01000010_1_Hypsibius_dujardini_scaffold10	DNA_pol3_beta	2.3e-33
	Raw assembly by Boothby et al. (2015)	gi_957787776_gb_LMYF01000404_1_Hypsibius_dujardini_scaffold490	RecR	3.3e-18
	Raw assembly by Boothby et al. (2015)	gi_957762746_gb_LMYF01021853_1_Hypsibius_dujardini_scaffold25519	GidB	2.9e-44
	Raw assembly by Boothby et al. (2015)	gi_957788175_gb_LMYF01000005_1_Hypsibius_dujardini_scaffold5	Methyltransf_5	2.6e-85
	Raw assembly by Boothby et al. (2015)	gi_957779657_gb_LMYF01008523_1_Hypsibius_dujardini_scaffold9280	RecR	6.1e-14
	Raw assembly by Boothby et al. (2015)	gi_957783000_gb_LMYF01005180_1_Hypsibius_dujardini_scaffold5517	Ribosomal_S9	7.8e-41
	Raw assembly by Boothby et al. (2015)	gi_957773516_gb_LMYF01011083_1_Hypsibius_dujardini_scaffold12422	SmpB	1.7e-29
	Raw assembly by Boothby et al. (2015)	gi_957788179_gb_LMYF01000001_1_Hypsibius_dujardini_scaffold1	Ribosomal_L2	5.1e-36
	Raw assembly by Boothby et al. (2015)	gi_957778995_gb_LMYF01009185_1_Hypsibius_dujardini_scaffold10085	Ribosomal_L5_C	7.7e-23
	Raw assembly by Boothby et al. (2015)	gi_957786752_gb_LMYF01001428_1_Hypsibius_dujardini_scaffold1595	zf-C4_ClpX	5.3e-18
	Raw assembly by Boothby et al. (2015)	gi_957788179_gb_LMYF01000001_1_Hypsibius_dujardini_scaffold1	Ribosomal_L29	1.7e-16
	Raw assembly by Boothby et al. (2015)	gi_957774143_gb_LMYF01010456_1_Hypsibius_dujardini_scaffold11661	GAD	1.1e-10
	Raw assembly by Boothby et al. (2015)	gi_957781568_gb_LMYF01006612_1_Hypsibius_dujardini_scaffold7041	Ribosomal_S17	2.1e-30
	Raw assembly by Boothby et al. (2015)	gi_957788179_gb_LMYF01000001_1_Hypsibius_dujardini_scaffold1	Ribosomal_S3_C	3.8e-31
	Raw assembly by Boothby et al. (2015)	gi_957787959_gb_LMYF01000221_1_Hypsibius_dujardini_scaffold277	RNA_pol_Rpb2_2	2.6e-30
	Raw assembly by Boothby et al. (2015)	gi_957787959_gb_LMYF01000221_1_Hypsibius_dujardini_scaffold277	RNA_pol_Rpb2_3	4.1e-30
	Raw assembly by Boothby et al. (2015)	gi_957788163_gb_LMYF01000017_1_Hypsibius_dujardini_scaffold19	RNA_pol_A_CTD	1.9e-27
	Raw assembly by Boothby et al. (2015)	gi_957779341_gb_LMYF01008839_1_Hypsibius_dujardini_scaffold9669	UPF0054	6e-39
	Raw assembly by Boothby et al. (2015)	gi_957780554_gb_LMYF01007626_1_Hypsibius_dujardini_scaffold8196	PNPase	5.2e-12
	Raw assembly by Boothby et al. (2015)	gi_957786844_gb_LMYF01001336_1_Hypsibius_dujardini_scaffold1499	RNA_pol_Rpb1_3	2.8e-18
	Raw assembly by Boothby et al. (2015)	gi_957787718_gb_LMYF01000462_1_Hypsibius_dujardini_scaffold555	EF_TS	1.5e-44
	Raw assembly by Boothby et al. (2015)	gi_957781451_gb_LMYF01006729_1_Hypsibius_dujardini_scaffold7168	GMP_synt_C	3.8e-42
	Raw assembly by Boothby et al. (2015)	gi_957785001_gb_LMYF01003179_1_Hypsibius_dujardini_scaffold3421	Ribosomal_S6	5.9e-31
	Raw assembly by Boothby et al. (2015)	gi_957783952_gb_LMYF01004228_1_Hypsibius_dujardini_scaffold4525	Ribosomal_L18e	1.6e-13
	Raw assembly by Boothby et al. (2015)	gi_957786822_gb_LMYF01001358_1_Hypsibius_dujardini_scaffold1521	RNA_pol_Rpb1_5	4.5e-62
	Raw assembly by Boothby et al. (2015)	gi_957782011_gb_LMYF01006169_1_Hypsibius_dujardini_scaffold6565	RNA_pol_A_bac	6.4e-17
	Raw assembly by Boothby et al. (2015)	gi_957774946_gb_LMYF01009653_1_Hypsibius_dujardini_scaffold10676	RecA	3.4e-168
	Raw assembly by Boothby et al. (2015)	gi_957772877_gb_LMYF01011722_1_Hypsibius_dujardini_scaffold13197	UvrC_HhH_N	1e-44
	Raw assembly by Boothby et al. (2015)	gi_957773750_gb_LMYF01010849_1_Hypsibius_dujardini_scaffold12135	Methyltransf_5	2.5e-99
	Raw assembly by Boothby et al. (2015)	gi_957780474_gb_LMYF01007706_1_Hypsibius_dujardini_scaffold8292	RNA_pol_Rpb2_6	7.6e-24
	Raw assembly by Boothby et al. (2015)	gi_957786473_gb_LMYF01001707_1_Hypsibius_dujardini_scaffold1884	Arg_tRNA_synt_N	6.1e-21
	Raw assembly by Boothby et al. (2015)	gi_957780745_gb_LMYF01007435_1_Hypsibius_dujardini_scaffold7968	RNA_pol_Rpb2_6	7.6e-24
	Raw assembly by Boothby et al. (2015)	gi_957787363_gb_LMYF01000817_1_Hypsibius_dujardini_scaffold952	Competence	1.2e-60
	Raw assembly by Boothby et al. (2015)	gi_957764936_gb_LMYF01019663_1_Hypsibius_dujardini_scaffold22903	DNA_pol3_beta_3	1e-27
	Raw assembly by Boothby et al. (2015)	gi_957788170_gb_LMYF01000010_1_Hypsibius_dujardini_scaffold10	UvrB	2.4e-24
	Raw assembly by Boothby et al. (2015)	gi_957785614_gb_LMYF01002566_1_Hypsibius_dujardini_scaffold2775	Trigger_N	6.8e-32
	Raw assembly by Boothby et al. (2015)	gi_957788169_gb_LMYF01000011_1_Hypsibius_dujardini_scaffold11	RBFA	7.9e-23
	Raw assembly by Boothby et al. (2015)	gi_957768696_gb_LMYF01015903_1_Hypsibius_dujardini_scaffold18324	Ribosomal_S5	2.4e-32
	Raw assembly by Boothby et al. (2015)	gi_957788174_gb_LMYF01000006_1_Hypsibius_dujardini_scaffold6	SmpB	1.6e-29
	Raw assembly by Boothby et al. (2015)	gi_957788169_gb_LMYF01000011_1_Hypsibius_dujardini_scaffold11	THF_DHG_CYH_C	2.1e-68
	Raw assembly by Boothby et al. (2015)	gi_957780454_gb_LMYF01007726_1_Hypsibius_dujardini_scaffold8316	THF_DHG_CYH	6.6e-37
	Raw assembly by Boothby et al. (2015)	gi_957787345_gb_LMYF01000835_1_Hypsibius_dujardini_scaffold972	RecA	3.1e-160
	Raw assembly by Boothby et al. (2015)	gi_957774260_gb_LMYF01010339_1_Hypsibius_dujardini_scaffold11527	tRNA-synt_2d	4.6e-92
	Raw assembly by Boothby et al. (2015)	gi_957788169_gb_LMYF01000011_1_Hypsibius_dujardini_scaffold11	Pept_tRNA_hydro	1.9e-52
	Raw assembly by Boothby et al. (2015)	gi_957788167_gb_LMYF01000013_1_Hypsibius_dujardini_scaffold15	IF3_N	4.1e-33
	Raw assembly by Boothby et al. (2015)	gi_957782173_gb_LMYF01006007_1_Hypsibius_dujardini_scaffold6388	Ribosomal_L32p	3.6e-20
	Raw assembly by Boothby et al. (2015)	gi_957786844_gb_LMYF01001336_1_Hypsibius_dujardini_scaffold1499	RNA_pol_Rpb1_5	4.9e-67
	Raw assembly by Boothby et al. (2015)	gi_957781248_gb_LMYF01006932_1_Hypsibius_dujardini_scaffold7404	Ribosomal_S7	5.4e-61
	Raw assembly by Boothby et al. (2015)	gi_957781235_gb_LMYF01006945_1_Hypsibius_dujardini_scaffold7418	Peptidase_A8	3.4e-14
	Raw assembly by Boothby et al. (2015)	gi_957774346_gb_LMYF01010253_1_Hypsibius_dujardini_scaffold11413	Trigger_C	3.4e-43
	Raw assembly by Boothby et al. (2015)	gi_957786724_gb_LMYF01001456_1_Hypsibius_dujardini_scaffold1623	Ribosomal_L23	3.8e-18
	Raw assembly by Boothby et al. (2015)	gi_957787666_gb_LMYF01000514_1_Hypsibius_dujardini_scaffold613	Ribosomal_L28	5.6e-32
	Raw assembly by Boothby et al. (2015)	gi_957767114_gb_LMYF01017485_1_Hypsibius_dujardini_scaffold20266	RNA_pol_A_CTD	2.2e-24
	Raw assembly by Boothby et al. (2015)	gi_957788121_gb_LMYF01000059_1_Hypsibius_dujardini_scaffold75	tRNA-synt_1d	2.2e-66
	Raw assembly by Boothby et al. (2015)	gi_957787755_gb_LMYF01000425_1_Hypsibius_dujardini_scaffold517	RecA	2.6e-160
	Raw assembly by Boothby et al. (2015)	gi_957787174_gb_LMYF01001006_1_Hypsibius_dujardini_scaffold1152	RNA_pol_Rpb2_1	6.7e-28
	Raw assembly by Boothby et al. (2015)	gi_957782964_gb_LMYF01005216_1_Hypsibius_dujardini_scaffold5555	UBA	5.6e-11
	Raw assembly by Boothby et al. (2015)	gi_957787796_gb_LMYF01000384_1_Hypsibius_dujardini_scaffold467	THF_DHG_CYH	1.3e-24
	Raw assembly by Boothby et al. (2015)	gi_957781798_gb_LMYF01006382_1_Hypsibius_dujardini_scaffold6792	RNA_pol_Rpb1_2	1e-21
	Raw assembly by Boothby et al. (2015)	gi_957773586_gb_LMYF01011013_1_Hypsibius_dujardini_scaffold12335	IF3_C	4.9e-26
	Raw assembly by Boothby et al. (2015)	gi_957787225_gb_LMYF01000955_1_Hypsibius_dujardini_scaffold1099	SecE	4.8e-17
	Raw assembly by Boothby et al. (2015)	gi_957765666_gb_LMYF01018933_1_Hypsibius_dujardini_scaffold22027	UPF0081	1.9e-37
	Raw assembly by Boothby et al. (2015)	gi_957784289_gb_LMYF01003891_1_Hypsibius_dujardini_scaffold4175	GAD	2.8e-11
	Raw assembly by Boothby et al. (2015)	gi_957779331_gb_LMYF01008849_1_Hypsibius_dujardini_scaffold9683	UvrC_HhH_N	3.7e-53
	Raw assembly by Boothby et al. (2015)	gi_957780474_gb_LMYF01007706_1_Hypsibius_dujardini_scaffold8292	RNA_pol_Rpb2_3	9.4e-20
	Raw assembly by Boothby et al. (2015)	gi_957774946_gb_LMYF01009653_1_Hypsibius_dujardini_scaffold10676	UBA	9e-14
	Raw assembly by Boothby et al. (2015)	gi_957780745_gb_LMYF01007435_1_Hypsibius_dujardini_scaffold7968	RNA_pol_Rpb2_7	2.8e-30
	Raw assembly by Boothby et al. (2015)	gi_957781568_gb_LMYF01006612_1_Hypsibius_dujardini_scaffold7041	Ribosomal_L29	1.8e-17
	Raw assembly by Boothby et al. (2015)	gi_957772846_gb_LMYF01011753_1_Hypsibius_dujardini_scaffold13231	THF_DHG_CYH	2.1e-43
	Raw assembly by Boothby et al. (2015)	gi_957773657_gb_LMYF01010942_1_Hypsibius_dujardini_scaffold12246	Ribosomal_L23	6.6e-25
	Raw assembly by Boothby et al. (2015)	gi_957774946_gb_LMYF01009653_1_Hypsibius_dujardini_scaffold10676	Ribosomal_S9	8e-50
	Raw assembly by Boothby et al. (2015)	gi_957782150_gb_LMYF01006030_1_Hypsibius_dujardini_scaffold6412	PGK	1.2e-09
	Raw assembly by Boothby et al. (2015)	gi_957781568_gb_LMYF01006612_1_Hypsibius_dujardini_scaffold7041	Ribosomal_S3_C	4.8e-33
	Raw assembly by Boothby et al. (2015)	gi_957783001_gb_LMYF01005179_1_Hypsibius_dujardini_scaffold5516	Ribosomal_L1	2.2e-44
	Raw assembly by Boothby et al. (2015)	gi_957779692_gb_LMYF01008488_1_Hypsibius_dujardini_scaffold9239	TruB_N	3.5e-51
	Raw assembly by Boothby et al. (2015)	gi_957774912_gb_LMYF01009687_1_Hypsibius_dujardini_scaffold10713	Oligomerisation	7.4e-33
	Raw assembly by Boothby et al. (2015)	gi_957786773_gb_LMYF01001407_1_Hypsibius_dujardini_scaffold1571	Toprim_N	2.4e-13
	Raw assembly by Boothby et al. (2015)	gi_957768496_gb_LMYF01016103_1_Hypsibius_dujardini_scaffold18573	PseudoU_synth_1	5.8e-39
	Raw assembly by Boothby et al. (2015)	gi_957773657_gb_LMYF01010942_1_Hypsibius_dujardini_scaffold12246	Ribosomal_L2	2.7e-39
	Raw assembly by Boothby et al. (2015)	gi_957786822_gb_LMYF01001358_1_Hypsibius_dujardini_scaffold1521	RNA_pol_Rpb1_2	1.4e-52
	Raw assembly by Boothby et al. (2015)	gi_957780755_gb_LMYF01007425_1_Hypsibius_dujardini_scaffold7956	Pept_tRNA_hydro	3.3e-55
	Raw assembly by Boothby et al. (2015)	gi_957774716_gb_LMYF01009883_1_Hypsibius_dujardini_scaffold10962	RNA_pol_L	9e-22
	Raw assembly by Boothby et al. (2015)	gi_957788174_gb_LMYF01000006_1_Hypsibius_dujardini_scaffold6	B5	7.3e-23
	Raw assembly by Boothby et al. (2015)	gi_957762658_gb_LMYF01021941_1_Hypsibius_dujardini_scaffold25622	THF_DHG_CYH_C	3.5e-21
	Raw assembly by Boothby et al. (2015)	gi_957788173_gb_LMYF01000007_1_Hypsibius_dujardini_scaffold7	FDX-ACB	8.1e-27
	Raw assembly by Boothby et al. (2015)	gi_957782452_gb_LMYF01005728_1_Hypsibius_dujardini_scaffold6094	RNA_pol_Rpb1_3	3e-12
	Raw assembly by Boothby et al. (2015)	gi_957780570_gb_LMYF01007610_1_Hypsibius_dujardini_scaffold8176	YchF-GTPase_C	5e-39
	Raw assembly by Boothby et al. (2015)	gi_957780838_gb_LMYF01007342_1_Hypsibius_dujardini_scaffold7861	Trigger_C	6.9e-11
	Raw assembly by Boothby et al. (2015)	gi_957788165_gb_LMYF01000015_1_Hypsibius_dujardini_scaffold17	Ribosomal_S8	4.5e-46
	Raw assembly by Boothby et al. (2015)	gi_957788160_gb_LMYF01000020_1_Hypsibius_dujardini_scaffold22	Ribosomal_S15	8e-28
	Raw assembly by Boothby et al. (2015)	gi_957770558_gb_LMYF01014041_1_Hypsibius_dujardini_scaffold16057	RNA_pol_L	1.6e-23
	Raw assembly by Boothby et al. (2015)	gi_957781979_gb_LMYF01006201_1_Hypsibius_dujardini_scaffold6600	RBFA	3.7e-31
	Raw assembly by Boothby et al. (2015)	gi_957772936_gb_LMYF01011663_1_Hypsibius_dujardini_scaffold13131	RimM	1.6e-20
	Raw assembly by Boothby et al. (2015)	gi_957788174_gb_LMYF01000006_1_Hypsibius_dujardini_scaffold6	tRNA_m1G_MT	2.3e-51
	Raw assembly by Boothby et al. (2015)	gi_957780474_gb_LMYF01007706_1_Hypsibius_dujardini_scaffold8292	RNA_pol_Rpb2_2	1.5e-13
	Raw assembly by Boothby et al. (2015)	gi_957781803_gb_LMYF01006377_1_Hypsibius_dujardini_scaffold6785	Enolase_N	8.2e-21
	Raw assembly by Boothby et al. (2015)	gi_957769615_gb_LMYF01014984_1_Hypsibius_dujardini_scaffold17209	RuvA_N	1.2e-21
	Raw assembly by Boothby et al. (2015)	gi_957773702_gb_LMYF01010897_1_Hypsibius_dujardini_scaffold12191	TIM	1e-99
	Raw assembly by Boothby et al. (2015)	gi_957766886_gb_LMYF01017713_1_Hypsibius_dujardini_scaffold20530	Ribosomal_L13	1.9e-51
	Raw assembly by Boothby et al. (2015)	gi_957773381_gb_LMYF01011218_1_Hypsibius_dujardini_scaffold12589	TruB_N	1.9e-55
	Raw assembly by Boothby et al. (2015)	gi_957785847_gb_LMYF01002333_1_Hypsibius_dujardini_scaffold2538	RNA_pol_Rpb1_1	4e-32
	Raw assembly by Boothby et al. (2015)	gi_957787438_gb_LMYF01000742_1_Hypsibius_dujardini_scaffold866	Enolase_C	3.8e-130
	Raw assembly by Boothby et al. (2015)	gi_957772936_gb_LMYF01011663_1_Hypsibius_dujardini_scaffold13131	SRP_SPB	2.7e-36
	Raw assembly by Boothby et al. (2015)	gi_957769110_gb_LMYF01015489_1_Hypsibius_dujardini_scaffold17819	DNA_pol3_beta_3	2.9e-26
	Raw assembly by Boothby et al. (2015)	gi_957787225_gb_LMYF01000955_1_Hypsibius_dujardini_scaffold1099	Ribosomal_L11	6.3e-34
	Raw assembly by Boothby et al. (2015)	gi_957779649_gb_LMYF01008531_1_Hypsibius_dujardini_scaffold9290	FDX-ACB	9.5e-30
	Raw assembly by Boothby et al. (2015)	gi_957770029_gb_LMYF01014570_1_Hypsibius_dujardini_scaffold16703	Ribosomal_S20p	1.2e-24
	Raw assembly by Boothby et al. (2015)	gi_957787279_gb_LMYF01000901_1_Hypsibius_dujardini_scaffold1040	Ribosomal_S3_C	1.3e-09
	Raw assembly by Boothby et al. (2015)	gi_957770283_gb_LMYF01014316_1_Hypsibius_dujardini_scaffold16386	UvrC_HhH_N	2e-21
	Raw assembly by Boothby et al. (2015)	gi_957787508_gb_LMYF01000672_1_Hypsibius_dujardini_scaffold790	dsrm	5.2e-14
	Raw assembly by Boothby et al. (2015)	gi_957778995_gb_LMYF01009185_1_Hypsibius_dujardini_scaffold10085	Ribosomal_L3	6e-38
	Raw assembly by Boothby et al. (2015)	gi_957769295_gb_LMYF01015304_1_Hypsibius_dujardini_scaffold17596	Cons_hypoth95	2.6e-35
	Raw assembly by Boothby et al. (2015)	gi_957788174_gb_LMYF01000006_1_Hypsibius_dujardini_scaffold6	Ribosomal_L19	5.8e-48
	Raw assembly by Boothby et al. (2015)	gi_957787508_gb_LMYF01000672_1_Hypsibius_dujardini_scaffold790	Ribosomal_L9_C	1.9e-17
	Raw assembly by Boothby et al. (2015)	gi_957788168_gb_LMYF01000012_1_Hypsibius_dujardini_scaffold14	Ribosomal_L6	6.1e-43
	Raw assembly by Boothby et al. (2015)	gi_957780360_gb_LMYF01007820_1_Hypsibius_dujardini_scaffold8427	Ribosomal_L23	1.8e-18
	Raw assembly by Boothby et al. (2015)	gi_957770448_gb_LMYF01014151_1_Hypsibius_dujardini_scaffold16192	DNA_pol3_beta_2	4.9e-29
	Raw assembly by Boothby et al. (2015)	gi_957765401_gb_LMYF01019198_1_Hypsibius_dujardini_scaffold22358	dsrm	1.3e-18
	Raw assembly by Boothby et al. (2015)	gi_957775000_gb_LMYF01009599_1_Hypsibius_dujardini_scaffold10608	UPF0081	1.3e-38
	Raw assembly by Boothby et al. (2015)	gi_957788167_gb_LMYF01000013_1_Hypsibius_dujardini_scaffold15	Ribosomal_L20	5.3e-45
	Raw assembly by Boothby et al. (2015)	gi_957787383_gb_LMYF01000797_1_Hypsibius_dujardini_scaffold928	dsrm	2.6e-09
	Raw assembly by Boothby et al. (2015)	gi_957784775_gb_LMYF01003405_1_Hypsibius_dujardini_scaffold3663	CoaE	2e-46
	Raw assembly by Boothby et al. (2015)	gi_957787438_gb_LMYF01000742_1_Hypsibius_dujardini_scaffold866	Enolase_N	1.4e-60
	Raw assembly by Boothby et al. (2015)	gi_957788173_gb_LMYF01000007_1_Hypsibius_dujardini_scaffold7	Trigger_N	1.2e-31
	Raw assembly by Boothby et al. (2015)	gi_957787959_gb_LMYF01000221_1_Hypsibius_dujardini_scaffold277	SecE	5.6e-19
	Raw assembly by Boothby et al. (2015)	gi_957784665_gb_LMYF01003515_1_Hypsibius_dujardini_scaffold3776	UBA	5.6e-11
	Raw assembly by Boothby et al. (2015)	gi_957774244_gb_LMYF01010355_1_Hypsibius_dujardini_scaffold11546	RecA	7.1e-160
	Raw assembly by Boothby et al. (2015)	gi_957770558_gb_LMYF01014041_1_Hypsibius_dujardini_scaffold16057	Ribosomal_L17	4.7e-30
	Raw assembly by Boothby et al. (2015)	gi_957788002_gb_LMYF01000178_1_Hypsibius_dujardini_scaffold228	dsrm	2.3e-17
	Raw assembly by Boothby et al. (2015)	gi_957788173_gb_LMYF01000007_1_Hypsibius_dujardini_scaffold7	GTP1_OBG	1.3e-48
	Raw assembly by Boothby et al. (2015)	gi_957767664_gb_LMYF01016935_1_Hypsibius_dujardini_scaffold19607	YchF-GTPase_C	3e-40
	Raw assembly by Boothby et al. (2015)	gi_957773586_gb_LMYF01011013_1_Hypsibius_dujardini_scaffold12335	IF3_N	2.2e-31
	Raw assembly by Boothby et al. (2015)	gi_957784571_gb_LMYF01003609_1_Hypsibius_dujardini_scaffold3875	RNA_pol_Rpb2_2	2.3e-30
	Raw assembly by Boothby et al. (2015)	gi_957785001_gb_LMYF01003179_1_Hypsibius_dujardini_scaffold3421	Ribosomal_S18	4.1e-26
	Raw assembly by Boothby et al. (2015)	gi_957788160_gb_LMYF01000020_1_Hypsibius_dujardini_scaffold22	Toprim_N	1.6e-36
	Raw assembly by Boothby et al. (2015)	gi_957787771_gb_LMYF01000409_1_Hypsibius_dujardini_scaffold495	tRNA-synt_2d	5.3e-100
	Raw assembly by Boothby et al. (2015)	gi_957766640_gb_LMYF01017959_1_Hypsibius_dujardini_scaffold20841	Ribosomal_L16	2e-53
	Raw assembly by Boothby et al. (2015)	gi_957788168_gb_LMYF01000012_1_Hypsibius_dujardini_scaffold14	Ribosomal_L5_C	3.4e-42
	Raw assembly by Boothby et al. (2015)	gi_957782452_gb_LMYF01005728_1_Hypsibius_dujardini_scaffold6094	RNA_pol_Rpb1_5	7.8e-18
	Raw assembly by Boothby et al. (2015)	gi_957766640_gb_LMYF01017959_1_Hypsibius_dujardini_scaffold20841	Ribosomal_S17	1.8e-30
	Raw assembly by Boothby et al. (2015)	gi_957785847_gb_LMYF01002333_1_Hypsibius_dujardini_scaffold2538	RNA_pol_Rpb1_5	2.3e-35
	Raw assembly by Boothby et al. (2015)	gi_957766095_gb_LMYF01018504_1_Hypsibius_dujardini_scaffold21513	PGK	1.1e-15
	Raw assembly by Boothby et al. (2015)	gi_957788174_gb_LMYF01000006_1_Hypsibius_dujardini_scaffold6	DNA_pol3_beta	6.8e-26
	Raw assembly by Boothby et al. (2015)	gi_957787494_gb_LMYF01000686_1_Hypsibius_dujardini_scaffold805	IF-2	4.2e-18
	Raw assembly by Boothby et al. (2015)	gi_957781589_gb_LMYF01006591_1_Hypsibius_dujardini_scaffold7017	UvrB	1e-22
	Raw assembly by Boothby et al. (2015)	gi_957788175_gb_LMYF01000005_1_Hypsibius_dujardini_scaffold5	Ribosomal_L9_N	1.7e-23
	Raw assembly by Boothby et al. (2015)	gi_957774476_gb_LMYF01010123_1_Hypsibius_dujardini_scaffold11258	Ribosomal_S13	1.6e-39
	Raw assembly by Boothby et al. (2015)	gi_957786822_gb_LMYF01001358_1_Hypsibius_dujardini_scaffold1521	RNA_pol_Rpb2_6	2.2e-151
	Raw assembly by Boothby et al. (2015)	gi_957788177_gb_LMYF01000003_1_Hypsibius_dujardini_scaffold3	dsrm	5.3e-19
	Raw assembly by Boothby et al. (2015)	gi_957766656_gb_LMYF01017943_1_Hypsibius_dujardini_scaffold20825	Oligomerisation	6.7e-29
	Raw assembly by Boothby et al. (2015)	gi_957768371_gb_LMYF01016228_1_Hypsibius_dujardini_scaffold18747	PGK	4.3e-95
	Raw assembly by Boothby et al. (2015)	gi_957769517_gb_LMYF01015082_1_Hypsibius_dujardini_scaffold17330	Ribosomal_L1	5.7e-11
	Raw assembly by Boothby et al. (2015)	gi_957788177_gb_LMYF01000003_1_Hypsibius_dujardini_scaffold3	Ribosomal_L17	3.8e-31
	Raw assembly by Boothby et al. (2015)	gi_957788179_gb_LMYF01000001_1_Hypsibius_dujardini_scaffold1	UBA	5.3e-13
	Raw assembly by Boothby et al. (2015)	gi_957785786_gb_LMYF01002394_1_Hypsibius_dujardini_scaffold2599	RimM	2.2e-13
	Raw assembly by Boothby et al. (2015)	gi_957788177_gb_LMYF01000003_1_Hypsibius_dujardini_scaffold3	RNA_pol_A_bac	4.2e-21
	Raw assembly by Boothby et al. (2015)	gi_957788174_gb_LMYF01000006_1_Hypsibius_dujardini_scaffold6	MurB_C	1.8e-26
	Raw assembly by Boothby et al. (2015)	gi_957780358_gb_LMYF01007822_1_Hypsibius_dujardini_scaffold8430	RimM	1.5e-16
	Raw assembly by Boothby et al. (2015)	gi_957774719_gb_LMYF01009880_1_Hypsibius_dujardini_scaffold10959	MurB_C	1.6e-30
	Raw assembly by Boothby et al. (2015)	gi_957787279_gb_LMYF01000901_1_Hypsibius_dujardini_scaffold1040	Ribosomal_L2	2.5e-18
	Raw assembly by Boothby et al. (2015)	gi_957783534_gb_LMYF01004646_1_Hypsibius_dujardini_scaffold4961	Ribosomal_L4	2.4e-09
	Raw assembly by Boothby et al. (2015)	gi_957782243_gb_LMYF01005937_1_Hypsibius_dujardini_scaffold6311	tRNA-synt_1d	1.5e-42
	Raw assembly by Boothby et al. (2015)	gi_957781709_gb_LMYF01006471_1_Hypsibius_dujardini_scaffold6887	SecG	9.3e-15
	Raw assembly by Boothby et al. (2015)	gi_957766886_gb_LMYF01017713_1_Hypsibius_dujardini_scaffold20530	Ribosomal_S9	2.5e-27
	Raw assembly by Boothby et al. (2015)	gi_957788173_gb_LMYF01000007_1_Hypsibius_dujardini_scaffold7	Ribosomal_S7	3.7e-57
	Raw assembly by Boothby et al. (2015)	gi_957788179_gb_LMYF01000001_1_Hypsibius_dujardini_scaffold1	Ribosomal_L12	7.6e-30
	Raw assembly by Boothby et al. (2015)	gi_957788179_gb_LMYF01000001_1_Hypsibius_dujardini_scaffold1	eIF-1a	5.9e-27
	Raw assembly by Boothby et al. (2015)	gi_957786822_gb_LMYF01001358_1_Hypsibius_dujardini_scaffold1521	RNA_pol_Rpb2_3	7.8e-28
	Raw assembly by Boothby et al. (2015)	gi_957788173_gb_LMYF01000007_1_Hypsibius_dujardini_scaffold7	CTP_synth_N	1e-130
	Raw assembly by Boothby et al. (2015)	gi_957788179_gb_LMYF01000001_1_Hypsibius_dujardini_scaffold1	Ribosomal_L1	1.7e-51
	Raw assembly by Boothby et al. (2015)	gi_957786822_gb_LMYF01001358_1_Hypsibius_dujardini_scaffold1521	RNA_pol_Rpb2_1	1e-19
	Raw assembly by Boothby et al. (2015)	gi_957769110_gb_LMYF01015489_1_Hypsibius_dujardini_scaffold17819	DNA_pol3_beta_2	1.2e-12
	Raw assembly by Boothby et al. (2015)	gi_957782452_gb_LMYF01005728_1_Hypsibius_dujardini_scaffold6094	RNA_pol_Rpb1_1	4e-32
	Raw assembly by Boothby et al. (2015)	gi_957788179_gb_LMYF01000001_1_Hypsibius_dujardini_scaffold1	RuvB_C	1.2e-36
	Raw assembly by Boothby et al. (2015)	gi_957778937_gb_LMYF01009243_1_Hypsibius_dujardini_scaffold10154	GrpE	1.2e-30
	Raw assembly by Boothby et al. (2015)	gi_957768636_gb_LMYF01015963_1_Hypsibius_dujardini_scaffold18405	Ribosomal_L21p	1.7e-28
	Raw assembly by Boothby et al. (2015)	gi_957783765_gb_LMYF01004415_1_Hypsibius_dujardini_scaffold4718	RNA_pol_A_bac	2.1e-23
	Raw assembly by Boothby et al. (2015)	gi_957788179_gb_LMYF01000001_1_Hypsibius_dujardini_scaffold1	EF_TS	1.6e-65
	Raw assembly by Boothby et al. (2015)	gi_957774806_gb_LMYF01009793_1_Hypsibius_dujardini_scaffold10846	Flavokinase	1.5e-39
	Raw assembly by Boothby et al. (2015)	gi_957772667_gb_LMYF01011932_1_Hypsibius_dujardini_scaffold13452	Methyltransf_5	4.5e-25
	Raw assembly by Boothby et al. (2015)	gi_957774085_gb_LMYF01010514_1_Hypsibius_dujardini_scaffold11733	RNA_pol_Rpb2_3	1e-21
	Raw assembly by Boothby et al. (2015)	gi_957783765_gb_LMYF01004415_1_Hypsibius_dujardini_scaffold4718	Ribosomal_S11	8.5e-44
	Raw assembly by Boothby et al. (2015)	gi_957788179_gb_LMYF01000001_1_Hypsibius_dujardini_scaffold1	RNA_pol_Rpb2_2	2.5e-32
	Raw assembly by Boothby et al. (2015)	gi_957786452_gb_LMYF01001728_1_Hypsibius_dujardini_scaffold1907	GrpE	1.2e-47
	Raw assembly by Boothby et al. (2015)	gi_957788179_gb_LMYF01000001_1_Hypsibius_dujardini_scaffold1	tRNA_m1G_MT	2.4e-47
	Raw assembly by Boothby et al. (2015)	gi_957788179_gb_LMYF01000001_1_Hypsibius_dujardini_scaffold1	RuvA_C	4.4e-12
	Raw assembly by Boothby et al. (2015)	gi_957788148_gb_LMYF01000032_1_Hypsibius_dujardini_scaffold38	GrpE	5.5e-49
	Raw assembly by Boothby et al. (2015)	gi_957778925_gb_LMYF01009255_1_Hypsibius_dujardini_scaffold10174	S-AdoMet_synt_M	6.2e-16
	Raw assembly by Boothby et al. (2015)	gi_957783765_gb_LMYF01004415_1_Hypsibius_dujardini_scaffold4718	eIF-1a	9.6e-27
	Raw assembly by Boothby et al. (2015)	gi_957771364_gb_LMYF01013235_1_Hypsibius_dujardini_scaffold15070	Ribosomal_L2_C	1.1e-51
	Raw assembly by Boothby et al. (2015)	gi_957788179_gb_LMYF01000001_1_Hypsibius_dujardini_scaffold1	dsrm	2.1e-14
	Raw assembly by Boothby et al. (2015)	gi_957784523_gb_LMYF01003657_1_Hypsibius_dujardini_scaffold3928	THF_DHG_CYH_C	6e-37
	Raw assembly by Boothby et al. (2015)	gi_957774346_gb_LMYF01010253_1_Hypsibius_dujardini_scaffold11413	zf-C4_ClpX	5.9e-24
	Raw assembly by Boothby et al. (2015)	gi_957766649_gb_LMYF01017950_1_Hypsibius_dujardini_scaffold20832	Ribosomal_L20	1e-45
	Raw assembly by Boothby et al. (2015)	gi_957788168_gb_LMYF01000012_1_Hypsibius_dujardini_scaffold14	Ribosomal_S19	2.1e-34
	Raw assembly by Boothby et al. (2015)	gi_957774387_gb_LMYF01010212_1_Hypsibius_dujardini_scaffold11366	Arg_tRNA_synt_N	1.4e-11
	Raw assembly by Boothby et al. (2015)	gi_957788175_gb_LMYF01000005_1_Hypsibius_dujardini_scaffold5	PGK	3.6e-165
	Raw assembly by Boothby et al. (2015)	gi_957788162_gb_LMYF01000018_1_Hypsibius_dujardini_scaffold20	CTP_synth_N	7.4e-37
	Raw assembly by Boothby et al. (2015)	gi_957788175_gb_LMYF01000005_1_Hypsibius_dujardini_scaffold5	Ribosomal_L10	4.4e-20
	Raw assembly by Boothby et al. (2015)	gi_957783765_gb_LMYF01004415_1_Hypsibius_dujardini_scaffold4718	Ribosomal_L17	2.6e-32
	Raw assembly by Boothby et al. (2015)	gi_957788179_gb_LMYF01000001_1_Hypsibius_dujardini_scaffold1	RNA_pol_Rpb1_4	2.2e-17
	Raw assembly by Boothby et al. (2015)	gi_957788179_gb_LMYF01000001_1_Hypsibius_dujardini_scaffold1	THF_DHG_CYH	4e-44
	Raw assembly by Boothby et al. (2015)	gi_957788179_gb_LMYF01000001_1_Hypsibius_dujardini_scaffold1	RNA_pol_A_bac	2.4e-20
	Raw assembly by Boothby et al. (2015)	gi_957774716_gb_LMYF01009883_1_Hypsibius_dujardini_scaffold10962	RNA_pol_A_CTD	7.8e-28
	Raw assembly by Boothby et al. (2015)	gi_957771874_gb_LMYF01012725_1_Hypsibius_dujardini_scaffold14435	Ribosomal_L13	9e-53
	Raw assembly by Boothby et al. (2015)	gi_957769393_gb_LMYF01015206_1_Hypsibius_dujardini_scaffold17481	Ribosomal_L16	1.5e-53
	Raw assembly by Boothby et al. (2015)	gi_957786896_gb_LMYF01001284_1_Hypsibius_dujardini_scaffold1446	tRNA_m1G_MT	3e-15
	Raw assembly by Boothby et al. (2015)	gi_957785921_gb_LMYF01002259_1_Hypsibius_dujardini_scaffold2463	Ribosomal_L22	1.4e-09
	Raw assembly by Boothby et al. (2015)	gi_957788172_gb_LMYF01000008_1_Hypsibius_dujardini_scaffold8	GAD	3.4e-19
	Raw assembly by Boothby et al. (2015)	gi_957774716_gb_LMYF01009883_1_Hypsibius_dujardini_scaffold10962	Ribosomal_S11	3.4e-22
	Raw assembly by Boothby et al. (2015)	gi_957784155_gb_LMYF01004025_1_Hypsibius_dujardini_scaffold4314	Ribosomal_L4	1.2e-47
	Raw assembly by Boothby et al. (2015)	gi_957788140_gb_LMYF01000040_1_Hypsibius_dujardini_scaffold48	Oligomerisation	2.6e-35
	Raw assembly by Boothby et al. (2015)	gi_957788168_gb_LMYF01000012_1_Hypsibius_dujardini_scaffold14	Ribosomal_L14	4.5e-56
	Raw assembly by Boothby et al. (2015)	gi_957784155_gb_LMYF01004025_1_Hypsibius_dujardini_scaffold4314	Ribosomal_S10	1.9e-39
	Raw assembly by Boothby et al. (2015)	gi_957774952_gb_LMYF01009647_1_Hypsibius_dujardini_scaffold10667	Oligomerisation	9.4e-33
	Raw assembly by Boothby et al. (2015)	gi_957774476_gb_LMYF01010123_1_Hypsibius_dujardini_scaffold11258	RNA_pol_A_CTD	1.9e-28
	Raw assembly by Boothby et al. (2015)	gi_957788172_gb_LMYF01000008_1_Hypsibius_dujardini_scaffold8	Methyltransf_5	7.4e-102
	Raw assembly by Boothby et al. (2015)	gi_957775049_gb_LMYF01009550_1_Hypsibius_dujardini_scaffold10545	EF_TS	4.1e-67
	Raw assembly by Boothby et al. (2015)	gi_957766649_gb_LMYF01017950_1_Hypsibius_dujardini_scaffold20832	tRNA-synt_2d	1.2e-104
	Raw assembly by Boothby et al. (2015)	gi_957787263_gb_LMYF01000917_1_Hypsibius_dujardini_scaffold1058	dsrm	4.4e-10
	Raw assembly by Boothby et al. (2015)	gi_957767487_gb_LMYF01017112_1_Hypsibius_dujardini_scaffold19824	Seryl_tRNA_N	4.6e-32
	Raw assembly by Boothby et al. (2015)	gi_957785950_gb_LMYF01002230_1_Hypsibius_dujardini_scaffold2434	GTP1_OBG	3.4e-19
	Raw assembly by Boothby et al. (2015)	gi_957779587_gb_LMYF01008593_1_Hypsibius_dujardini_scaffold9361	UBA	8.2e-14
	Raw assembly by Boothby et al. (2015)	gi_957771364_gb_LMYF01013235_1_Hypsibius_dujardini_scaffold15070	Ribosomal_L22	7.1e-30
	Raw assembly by Boothby et al. (2015)	gi_957780591_gb_LMYF01007589_1_Hypsibius_dujardini_scaffold8148	RNA_pol_Rpb1_1	8.9e-10
	Raw assembly by Boothby et al. (2015)	gi_957788168_gb_LMYF01000012_1_Hypsibius_dujardini_scaffold14	Ribosomal_L18e	4e-27
	Raw assembly by Boothby et al. (2015)	gi_957779587_gb_LMYF01008593_1_Hypsibius_dujardini_scaffold9361	Ribosomal_S9	7.5e-51
	Raw assembly by Boothby et al. (2015)	gi_957771364_gb_LMYF01013235_1_Hypsibius_dujardini_scaffold15070	Ribosomal_L3	2.7e-42
	Raw assembly by Boothby et al. (2015)	gi_957775055_gb_LMYF01009544_1_Hypsibius_dujardini_scaffold10537	Ribosomal_L32p	4.3e-25
	Raw assembly by Boothby et al. (2015)	gi_957772435_gb_LMYF01012164_1_Hypsibius_dujardini_scaffold13733	UvrB	1.3e-23
	Raw assembly by Boothby et al. (2015)	gi_957771364_gb_LMYF01013235_1_Hypsibius_dujardini_scaffold15070	Ribosomal_L23	5.8e-23
	Raw assembly by Boothby et al. (2015)	gi_957782301_gb_LMYF01005879_1_Hypsibius_dujardini_scaffold6252	Trigger_C	1.6e-23
	Raw assembly by Boothby et al. (2015)	gi_957769868_gb_LMYF01014731_1_Hypsibius_dujardini_scaffold16901	THF_DHG_CYH_C	4.2e-22
	Raw assembly by Boothby et al. (2015)	gi_957771175_gb_LMYF01013424_1_Hypsibius_dujardini_scaffold15301	Ribosomal_L19	9.5e-47
	Raw assembly by Boothby et al. (2015)	gi_957778995_gb_LMYF01009185_1_Hypsibius_dujardini_scaffold10085	Ribosomal_S19	7.4e-41
	Raw assembly by Boothby et al. (2015)	gi_957765471_gb_LMYF01019128_1_Hypsibius_dujardini_scaffold22272	Ribosomal_S19	3.5e-34
	Raw assembly by Boothby et al. (2015)	gi_957784176_gb_LMYF01004004_1_Hypsibius_dujardini_scaffold4293	S-AdoMet_synt_C	1.5e-65
	Raw assembly by Boothby et al. (2015)	gi_957778995_gb_LMYF01009185_1_Hypsibius_dujardini_scaffold10085	Ribosomal_L2	3.9e-35
	Raw assembly by Boothby et al. (2015)	gi_957779803_gb_LMYF01008377_1_Hypsibius_dujardini_scaffold9099	RNA_pol_Rpb2_2	5.3e-30
	Raw assembly by Boothby et al. (2015)	gi_957781372_gb_LMYF01006808_1_Hypsibius_dujardini_scaffold7259	UPF0079	1.4e-32
	Raw assembly by Boothby et al. (2015)	gi_957787718_gb_LMYF01000462_1_Hypsibius_dujardini_scaffold555	UBA	2.1e-11
	Raw assembly by Boothby et al. (2015)	gi_957778995_gb_LMYF01009185_1_Hypsibius_dujardini_scaffold10085	Ribosomal_L4	1.2e-61
	Raw assembly by Boothby et al. (2015)	gi_957765471_gb_LMYF01019128_1_Hypsibius_dujardini_scaffold22272	Ribosomal_L4	1.2e-49
	Raw assembly by Boothby et al. (2015)	gi_957775245_gb_LMYF01009354_1_Hypsibius_dujardini_scaffold10305	Ribosomal_L19	8.5e-46
	Raw assembly by Boothby et al. (2015)	gi_957774476_gb_LMYF01010123_1_Hypsibius_dujardini_scaffold11258	RNA_pol_L	2.9e-23
	Raw assembly by Boothby et al. (2015)	gi_957780686_gb_LMYF01007494_1_Hypsibius_dujardini_scaffold8037	RNA_pol_L	9.3e-24
	Raw assembly by Boothby et al. (2015)	gi_957774476_gb_LMYF01010123_1_Hypsibius_dujardini_scaffold11258	Ribosomal_S11	6.6e-50
	Raw assembly by Boothby et al. (2015)	gi_957771364_gb_LMYF01013235_1_Hypsibius_dujardini_scaffold15070	Ribosomal_S10	2.8e-41
	Raw assembly by Boothby et al. (2015)	gi_957784979_gb_LMYF01003201_1_Hypsibius_dujardini_scaffold3443	RNA_pol_A_bac	2.8e-24
	Raw assembly by Boothby et al. (2015)	gi_957788163_gb_LMYF01000017_1_Hypsibius_dujardini_scaffold19	Ribosomal_S4	1.9e-21
	Raw assembly by Boothby et al. (2015)	gi_957780686_gb_LMYF01007494_1_Hypsibius_dujardini_scaffold8037	PseudoU_synth_1	1.3e-33
	Raw assembly by Boothby et al. (2015)	gi_957765633_gb_LMYF01018966_1_Hypsibius_dujardini_scaffold22067	Val_tRNA-synt_C	2.8e-17
	Raw assembly by Boothby et al. (2015)	gi_957788174_gb_LMYF01000006_1_Hypsibius_dujardini_scaffold6	IPPT	2e-44
	Raw assembly by Boothby et al. (2015)	gi_957780686_gb_LMYF01007494_1_Hypsibius_dujardini_scaffold8037	Ribosomal_S9	8.8e-41
	Raw assembly by Boothby et al. (2015)	gi_957786833_gb_LMYF01001347_1_Hypsibius_dujardini_scaffold1510	dsrm	1.4e-18
	Raw assembly by Boothby et al. (2015)	gi_957788179_gb_LMYF01000001_1_Hypsibius_dujardini_scaffold1	Ribosomal_S10	4e-42
	Raw assembly by Boothby et al. (2015)	gi_957788170_gb_LMYF01000010_1_Hypsibius_dujardini_scaffold10	Enolase_C	1.9e-130
	Raw assembly by Boothby et al. (2015)	gi_957788177_gb_LMYF01000003_1_Hypsibius_dujardini_scaffold3	THF_DHG_CYH_C	4.5e-66
	Raw assembly by Boothby et al. (2015)	gi_957775235_gb_LMYF01009364_1_Hypsibius_dujardini_scaffold10317	Ribonuclease_P	4.8e-19
	Raw assembly by Boothby et al. (2015)	gi_957768696_gb_LMYF01015903_1_Hypsibius_dujardini_scaffold18324	Ribosomal_L5_C	6.9e-39
	Raw assembly by Boothby et al. (2015)	gi_957773810_gb_LMYF01010789_1_Hypsibius_dujardini_scaffold12061	UPF0081	7.1e-37
	Raw assembly by Boothby et al. (2015)	gi_957782470_gb_LMYF01005710_1_Hypsibius_dujardini_scaffold6076	TIM	3.2e-87
	Raw assembly by Boothby et al. (2015)	gi_957768696_gb_LMYF01015903_1_Hypsibius_dujardini_scaffold18324	Ribosomal_L6	2.2e-36
	Raw assembly by Boothby et al. (2015)	gi_957787420_gb_LMYF01000760_1_Hypsibius_dujardini_scaffold886	GTP1_OBG	8.7e-62
	Raw assembly by Boothby et al. (2015)	gi_957765626_gb_LMYF01018973_1_Hypsibius_dujardini_scaffold22076	Phe_tRNA-synt_N	4e-18
	Raw assembly by Boothby et al. (2015)	gi_957774213_gb_LMYF01010386_1_Hypsibius_dujardini_scaffold11579	DNA_pol3_beta	1.9e-41
	Raw assembly by Boothby et al. (2015)	gi_957787612_gb_LMYF01000568_1_Hypsibius_dujardini_scaffold675	Ribosomal_L29	4.1e-11
	Raw assembly by Boothby et al. (2015)	gi_957788168_gb_LMYF01000012_1_Hypsibius_dujardini_scaffold14	Ribosomal_S5_C	1.9e-30
	Raw assembly by Boothby et al. (2015)	gi_957786346_gb_LMYF01001834_1_Hypsibius_dujardini_scaffold2019	tRNA-synt_2d	1.2e-102
	Raw assembly by Boothby et al. (2015)	gi_957784026_gb_LMYF01004154_1_Hypsibius_dujardini_scaffold4448	Ribosomal_L21p	1.3e-36
	Raw assembly by Boothby et al. (2015)	gi_957787315_gb_LMYF01000865_1_Hypsibius_dujardini_scaffold1003	RNA_pol_Rpb2_6	3.1e-36
	Raw assembly by Boothby et al. (2015)	gi_957780403_gb_LMYF01007777_1_Hypsibius_dujardini_scaffold8376	Competence	3.2e-61
	Raw assembly by Boothby et al. (2015)	gi_957788179_gb_LMYF01000001_1_Hypsibius_dujardini_scaffold1	Cytidylate_kin	9.2e-46
	Raw assembly by Boothby et al. (2015)	gi_957788170_gb_LMYF01000010_1_Hypsibius_dujardini_scaffold10	Oligomerisation	5.2e-32
	Raw assembly by Boothby et al. (2015)	gi_957784026_gb_LMYF01004154_1_Hypsibius_dujardini_scaffold4448	GTP1_OBG	1.1e-23
	Raw assembly by Boothby et al. (2015)	gi_957788179_gb_LMYF01000001_1_Hypsibius_dujardini_scaffold1	Ribosom_S12_S23	3.4e-59
	Raw assembly by Boothby et al. (2015)	gi_957788170_gb_LMYF01000010_1_Hypsibius_dujardini_scaffold10	RecR	4.2e-15
	Raw assembly by Boothby et al. (2015)	gi_957767811_gb_LMYF01016788_1_Hypsibius_dujardini_scaffold19437	GAD	1.9e-18
	Raw assembly by Boothby et al. (2015)	gi_957786346_gb_LMYF01001834_1_Hypsibius_dujardini_scaffold2019	Ribosomal_L20	2.7e-41
	Raw assembly by Boothby et al. (2015)	gi_957788179_gb_LMYF01000001_1_Hypsibius_dujardini_scaffold1	RNA_pol_Rpb1_1	1.5e-88
	Raw assembly by Boothby et al. (2015)	gi_957787959_gb_LMYF01000221_1_Hypsibius_dujardini_scaffold277	Ribosomal_L12	9.5e-29
	Raw assembly by Boothby et al. (2015)	gi_957765383_gb_LMYF01019216_1_Hypsibius_dujardini_scaffold22382	RNA_pol_Rpb2_7	1.1e-32
	Raw assembly by Boothby et al. (2015)	gi_957765471_gb_LMYF01019128_1_Hypsibius_dujardini_scaffold22272	Ribosomal_L2	1.5e-33
	Raw assembly by Boothby et al. (2015)	gi_957788176_gb_LMYF01000004_1_Hypsibius_dujardini_scaffold4	Enolase_C	1.8e-130
	Raw assembly by Boothby et al. (2015)	gi_957780686_gb_LMYF01007494_1_Hypsibius_dujardini_scaffold8037	Ribosomal_S4	2.5e-24
	Raw assembly by Boothby et al. (2015)	gi_957766095_gb_LMYF01018504_1_Hypsibius_dujardini_scaffold21513	PGK	9.6e-18
	Raw assembly by Boothby et al. (2015)	gi_957788176_gb_LMYF01000004_1_Hypsibius_dujardini_scaffold4	UvrC_HhH_N	1.4e-56
	Raw assembly by Boothby et al. (2015)	gi_957772030_gb_LMYF01012569_1_Hypsibius_dujardini_scaffold14233	Methyltransf_5	8e-106
	Raw assembly by Boothby et al. (2015)	gi_957762993_gb_LMYF01021606_1_Hypsibius_dujardini_scaffold25212	Ribosomal_S18	1e-24
	Raw assembly by Boothby et al. (2015)	gi_957781568_gb_LMYF01006612_1_Hypsibius_dujardini_scaffold7041	Ribosomal_L5_C	1.8e-41
	Raw assembly by Boothby et al. (2015)	gi_957788176_gb_LMYF01000004_1_Hypsibius_dujardini_scaffold4	RBFA	9.4e-19
	Raw assembly by Boothby et al. (2015)	gi_957787850_gb_LMYF01000330_1_Hypsibius_dujardini_scaffold404	Ribosomal_L13	2.4e-53
	Raw assembly by Boothby et al. (2015)	gi_957778959_gb_LMYF01009221_1_Hypsibius_dujardini_scaffold10131	TruB_N	4e-51
	Raw assembly by Boothby et al. (2015)	gi_957775025_gb_LMYF01009574_1_Hypsibius_dujardini_scaffold10574	FDX-ACB	8.9e-28
	Raw assembly by Boothby et al. (2015)	gi_957785937_gb_LMYF01002243_1_Hypsibius_dujardini_scaffold2447	Ribosomal_S16	2e-09
	Raw assembly by Boothby et al. (2015)	gi_957788176_gb_LMYF01000004_1_Hypsibius_dujardini_scaffold4	GidB	9e-42
	Raw assembly by Boothby et al. (2015)	gi_957780132_gb_LMYF01008048_1_Hypsibius_dujardini_scaffold8693	Ribosomal_L10	1.6e-24
	Raw assembly by Boothby et al. (2015)	gi_957780686_gb_LMYF01007494_1_Hypsibius_dujardini_scaffold8037	Ribosomal_L13	3.2e-53
	Raw assembly by Boothby et al. (2015)	gi_957787099_gb_LMYF01001081_1_Hypsibius_dujardini_scaffold1231	GMP_synt_C	5.9e-42
	Raw assembly by Boothby et al. (2015)	gi_957785944_gb_LMYF01002236_1_Hypsibius_dujardini_scaffold2440	RecA	7.1e-10
	Raw assembly by Boothby et al. (2015)	gi_957783485_gb_LMYF01004695_1_Hypsibius_dujardini_scaffold5013	RNA_pol_Rpb1_2	1.3e-53
	Raw assembly by Boothby et al. (2015)	gi_957788172_gb_LMYF01000008_1_Hypsibius_dujardini_scaffold8	PGK	8.6e-151
	Raw assembly by Boothby et al. (2015)	gi_957780686_gb_LMYF01007494_1_Hypsibius_dujardini_scaffold8037	Ribosomal_L19	1.7e-44
	Raw assembly by Boothby et al. (2015)	gi_957788176_gb_LMYF01000004_1_Hypsibius_dujardini_scaffold4	Oligomerisation	3.2e-31
	Raw assembly by Boothby et al. (2015)	gi_957783485_gb_LMYF01004695_1_Hypsibius_dujardini_scaffold5013	RNA_pol_Rpb1_5	2.4e-64
	Raw assembly by Boothby et al. (2015)	gi_957765383_gb_LMYF01019216_1_Hypsibius_dujardini_scaffold22382	RNA_pol_Rpb1_2	2.4e-54
	Raw assembly by Boothby et al. (2015)	gi_957772580_gb_LMYF01012019_1_Hypsibius_dujardini_scaffold13549	Ribosomal_L14	5.6e-21
	Raw assembly by Boothby et al. (2015)	gi_957788179_gb_LMYF01000001_1_Hypsibius_dujardini_scaffold1	RNA_pol_Rpb1_2	7.6e-53
	Raw assembly by Boothby et al. (2015)	gi_957765938_gb_LMYF01018661_1_Hypsibius_dujardini_scaffold21697	Enolase_C	4.3e-30
	Raw assembly by Boothby et al. (2015)	gi_957765383_gb_LMYF01019216_1_Hypsibius_dujardini_scaffold22382	RNA_pol_Rpb1_5	3.6e-27
	Raw assembly by Boothby et al. (2015)	gi_957781484_gb_LMYF01006696_1_Hypsibius_dujardini_scaffold7130	Val_tRNA-synt_C	3.6e-12
	Raw assembly by Boothby et al. (2015)	gi_957769393_gb_LMYF01015206_1_Hypsibius_dujardini_scaffold17481	Ribosomal_S19	3.6e-35
	Raw assembly by Boothby et al. (2015)	gi_957788168_gb_LMYF01000012_1_Hypsibius_dujardini_scaffold14	Peptidase_A8	3.8e-35
	Raw assembly by Boothby et al. (2015)	gi_957762967_gb_LMYF01021632_1_Hypsibius_dujardini_scaffold25242	S-AdoMet_synt_M	1.4e-47
	Raw assembly by Boothby et al. (2015)	gi_957780381_gb_LMYF01007799_1_Hypsibius_dujardini_scaffold8403	IF-2	4.2e-18
	Raw assembly by Boothby et al. (2015)	gi_957788168_gb_LMYF01000012_1_Hypsibius_dujardini_scaffold14	Ribosomal_S20p	6.4e-16
	Raw assembly by Boothby et al. (2015)	gi_957765383_gb_LMYF01019216_1_Hypsibius_dujardini_scaffold22382	RNA_pol_Rpb1_1	3.1e-101
	Raw assembly by Boothby et al. (2015)	gi_957769393_gb_LMYF01015206_1_Hypsibius_dujardini_scaffold17481	Ribosomal_L29	8.7e-15
	Raw assembly by Boothby et al. (2015)	gi_957779436_gb_LMYF01008744_1_Hypsibius_dujardini_scaffold9547	RecR	1.5e-17
	Raw assembly by Boothby et al. (2015)	gi_957788165_gb_LMYF01000015_1_Hypsibius_dujardini_scaffold17	SecY	1.9e-92
	Raw assembly by Boothby et al. (2015)	gi_957783935_gb_LMYF01004245_1_Hypsibius_dujardini_scaffold4543	FDX-ACB	1.4e-29
	Raw assembly by Boothby et al. (2015)	gi_957779981_gb_LMYF01008199_1_Hypsibius_dujardini_scaffold8876	SecE	2.5e-17
	Raw assembly by Boothby et al. (2015)	gi_957775126_gb_LMYF01009473_1_Hypsibius_dujardini_scaffold10446	RecA	1.3e-11
	Raw assembly by Boothby et al. (2015)	gi_957788178_gb_LMYF01000002_1_Hypsibius_dujardini_scaffold2	S-AdoMet_synt_M	2.2e-46
	Raw assembly by Boothby et al. (2015)	gi_957788173_gb_LMYF01000007_1_Hypsibius_dujardini_scaffold7	zf-C4_ClpX	5.9e-18
	Raw assembly by Boothby et al. (2015)	gi_957767019_gb_LMYF01017580_1_Hypsibius_dujardini_scaffold20381	RecA	7.6e-167
	Raw assembly by Boothby et al. (2015)	gi_957783938_gb_LMYF01004242_1_Hypsibius_dujardini_scaffold4540	tRNA-synt_2d	2.9e-23
	Raw assembly by Boothby et al. (2015)	gi_957787669_gb_LMYF01000511_1_Hypsibius_dujardini_scaffold610	RecR	4.9e-14
	Raw assembly by Boothby et al. (2015)	gi_957773303_gb_LMYF01011296_1_Hypsibius_dujardini_scaffold12684	Oligomerisation	1.1e-32
	Raw assembly by Boothby et al. (2015)	gi_957787315_gb_LMYF01000865_1_Hypsibius_dujardini_scaffold1003	RNA_pol_Rpb2_7	5.2e-24
	Raw assembly by Boothby et al. (2015)	gi_957788179_gb_LMYF01000001_1_Hypsibius_dujardini_scaffold1	Ribosomal_S18	8.6e-26
	Raw assembly by Boothby et al. (2015)	gi_957774213_gb_LMYF01010386_1_Hypsibius_dujardini_scaffold11579	DNA_pol3_beta_3	1.9e-40
	Raw assembly by Boothby et al. (2015)	gi_957784552_gb_LMYF01003628_1_Hypsibius_dujardini_scaffold3896	THF_DHG_CYH_C	1.4e-16
	Raw assembly by Boothby et al. (2015)	gi_957786705_gb_LMYF01001475_1_Hypsibius_dujardini_scaffold1643	SmpB	9.2e-30
	Raw assembly by Boothby et al. (2015)	gi_957775173_gb_LMYF01009426_1_Hypsibius_dujardini_scaffold10392	Cytidylate_kin	3.8e-51
	Raw assembly by Boothby et al. (2015)	gi_957768480_gb_LMYF01016119_1_Hypsibius_dujardini_scaffold18596	IF3_N	1.1e-33
	Raw assembly by Boothby et al. (2015)	gi_957787315_gb_LMYF01000865_1_Hypsibius_dujardini_scaffold1003	RNA_pol_Rpb2_1	5.3e-44
	Raw assembly by Boothby et al. (2015)	gi_957783939_gb_LMYF01004241_1_Hypsibius_dujardini_scaffold4539	RNA_pol_Rpb1_5	7.5e-68
	Raw assembly by Boothby et al. (2015)	gi_957787997_gb_LMYF01000183_1_Hypsibius_dujardini_scaffold233	RuvA_C	3.6e-09
	Raw assembly by Boothby et al. (2015)	gi_957783939_gb_LMYF01004241_1_Hypsibius_dujardini_scaffold4539	RNA_pol_Rpb2_7	1.7e-30
	Raw assembly by Boothby et al. (2015)	gi_957787997_gb_LMYF01000183_1_Hypsibius_dujardini_scaffold233	RecA	2e-168
	Raw assembly by Boothby et al. (2015)	gi_957788168_gb_LMYF01000012_1_Hypsibius_dujardini_scaffold14	GrpE	1.8e-43
	Raw assembly by Boothby et al. (2015)	gi_957781568_gb_LMYF01006612_1_Hypsibius_dujardini_scaffold7041	SecY	4e-86
	Raw assembly by Boothby et al. (2015)	gi_957781116_gb_LMYF01007064_1_Hypsibius_dujardini_scaffold7544	GTP1_OBG	4.4e-59
	Raw assembly by Boothby et al. (2015)	gi_957773026_gb_LMYF01011573_1_Hypsibius_dujardini_scaffold13019	Oligomerisation	3.2e-34
	Raw assembly by Boothby et al. (2015)	gi_957768323_gb_LMYF01016276_1_Hypsibius_dujardini_scaffold18801	UPF0079	5e-35
	Raw assembly by Boothby et al. (2015)	gi_957787228_gb_LMYF01000952_1_Hypsibius_dujardini_scaffold1096	Ribosomal_L16	1.8e-10
	Raw assembly by Boothby et al. (2015)	gi_957788173_gb_LMYF01000007_1_Hypsibius_dujardini_scaffold7	Phe_tRNA-synt_N	3.4e-12
	Raw assembly by Boothby et al. (2015)	gi_957782597_gb_LMYF01005583_1_Hypsibius_dujardini_scaffold5940	MurB_C	2.1e-27
	Raw assembly by Boothby et al. (2015)	gi_957788174_gb_LMYF01000006_1_Hypsibius_dujardini_scaffold6	GTP1_OBG	5.7e-52
	Raw assembly by Boothby et al. (2015)	gi_957783245_gb_LMYF01004935_1_Hypsibius_dujardini_scaffold5259	RNA_pol_Rpb1_2	1e-21
	Raw assembly by Boothby et al. (2015)	gi_957787180_gb_LMYF01001000_1_Hypsibius_dujardini_scaffold1146	S-AdoMet_synt_C	2.6e-63
	Raw assembly by Boothby et al. (2015)	gi_957783566_gb_LMYF01004614_1_Hypsibius_dujardini_scaffold4929	Ribosomal_L14	1.9e-19
	Raw assembly by Boothby et al. (2015)	gi_957788165_gb_LMYF01000015_1_Hypsibius_dujardini_scaffold17	Ribosomal_S5_C	8.6e-27
	Raw assembly by Boothby et al. (2015)	gi_957788178_gb_LMYF01000002_1_Hypsibius_dujardini_scaffold2	PNPase	5.7e-14
	Raw assembly by Boothby et al. (2015)	gi_957765938_gb_LMYF01018661_1_Hypsibius_dujardini_scaffold21697	Enolase_N	1.4e-61
	Raw assembly by Boothby et al. (2015)	gi_957788173_gb_LMYF01000007_1_Hypsibius_dujardini_scaffold7	TRCF	7.6e-28
	Raw assembly by Boothby et al. (2015)	gi_957788175_gb_LMYF01000005_1_Hypsibius_dujardini_scaffold5	Ribosomal_L14	1.5e-41
	Raw assembly by Boothby et al. (2015)	gi_957783485_gb_LMYF01004695_1_Hypsibius_dujardini_scaffold5013	RNA_pol_Rpb1_3	3.1e-23
	Raw assembly by Boothby et al. (2015)	gi_957787371_gb_LMYF01000809_1_Hypsibius_dujardini_scaffold941	SecY	2.5e-11
	Raw assembly by Boothby et al. (2015)	gi_957788173_gb_LMYF01000007_1_Hypsibius_dujardini_scaffold7	UPF0079	9.4e-29
	Raw assembly by Boothby et al. (2015)	gi_957782113_gb_LMYF01006067_1_Hypsibius_dujardini_scaffold6453	Trigger_N	9.3e-39
	Raw assembly by Boothby et al. (2015)	gi_957788163_gb_LMYF01000017_1_Hypsibius_dujardini_scaffold19	S-AdoMet_synt_M	1.8e-47
	Raw assembly by Boothby et al. (2015)	gi_957788174_gb_LMYF01000006_1_Hypsibius_dujardini_scaffold6	Ribosomal_S2	2e-86
	Raw assembly by Boothby et al. (2015)	gi_957787279_gb_LMYF01000901_1_Hypsibius_dujardini_scaffold1040	Ribosomal_L16	1.9e-40
	Raw assembly by Boothby et al. (2015)	gi_957788163_gb_LMYF01000017_1_Hypsibius_dujardini_scaffold19	UPF0081	5.3e-36
	Raw assembly by Boothby et al. (2015)	gi_957788174_gb_LMYF01000006_1_Hypsibius_dujardini_scaffold6	RRF	1.8e-67
	Raw assembly by Boothby et al. (2015)	gi_957774729_gb_LMYF01009870_1_Hypsibius_dujardini_scaffold10944	Oligomerisation	3.4e-31
	Raw assembly by Boothby et al. (2015)	gi_957782230_gb_LMYF01005950_1_Hypsibius_dujardini_scaffold6324	RuvA_C	7.5e-12
	Raw assembly by Boothby et al. (2015)	gi_957766640_gb_LMYF01017959_1_Hypsibius_dujardini_scaffold20841	Ribosomal_L2_C	7.5e-39
	Raw assembly by Boothby et al. (2015)	gi_957788177_gb_LMYF01000003_1_Hypsibius_dujardini_scaffold3	Ribosomal_S20p	2.2e-22
	Raw assembly by Boothby et al. (2015)	gi_957780788_gb_LMYF01007392_1_Hypsibius_dujardini_scaffold7915	SecE	2e-17
	Raw assembly by Boothby et al. (2015)	gi_957787993_gb_LMYF01000187_1_Hypsibius_dujardini_scaffold237	IF3_C	8.2e-33
	Raw assembly by Boothby et al. (2015)	gi_957788172_gb_LMYF01000008_1_Hypsibius_dujardini_scaffold8	CoaE	1.5e-47
	Raw assembly by Boothby et al. (2015)	gi_957766640_gb_LMYF01017959_1_Hypsibius_dujardini_scaffold20841	Ribosomal_L22	3e-31
	Raw assembly by Boothby et al. (2015)	gi_957788177_gb_LMYF01000003_1_Hypsibius_dujardini_scaffold3	RuvA_N	1.2e-15
	Raw assembly by Boothby et al. (2015)	gi_957767114_gb_LMYF01017485_1_Hypsibius_dujardini_scaffold20266	Ribosomal_L17	1.2e-36
	Raw assembly by Boothby et al. (2015)	gi_957773430_gb_LMYF01011169_1_Hypsibius_dujardini_scaffold12527	RuvA_C	7e-11
	Raw assembly by Boothby et al. (2015)	gi_957787279_gb_LMYF01000901_1_Hypsibius_dujardini_scaffold1040	Ribosom_S12_S23	9.3e-44
	Raw assembly by Boothby et al. (2015)	gi_957788172_gb_LMYF01000008_1_Hypsibius_dujardini_scaffold8	IPPT	4.9e-70
	Raw assembly by Boothby et al. (2015)	gi_957787509_gb_LMYF01000671_1_Hypsibius_dujardini_scaffold789	RuvB_C	2.6e-15
	Raw assembly by Boothby et al. (2015)	gi_957782977_gb_LMYF01005203_1_Hypsibius_dujardini_scaffold5540	PGK	2.7e-25
	Raw assembly by Boothby et al. (2015)	gi_957780940_gb_LMYF01007240_1_Hypsibius_dujardini_scaffold7741	UvrB	4.3e-21
	Raw assembly by Boothby et al. (2015)	gi_957783293_gb_LMYF01004887_1_Hypsibius_dujardini_scaffold5210	Cons_hypoth95	1.5e-50
	Raw assembly by Boothby et al. (2015)	gi_957771970_gb_LMYF01012629_1_Hypsibius_dujardini_scaffold14313	RRF	1.2e-63
	Raw assembly by Boothby et al. (2015)	gi_957774904_gb_LMYF01009695_1_Hypsibius_dujardini_scaffold10726	S-AdoMet_synt_M	2.5e-52
	Raw assembly by Boothby et al. (2015)	gi_957768762_gb_LMYF01015837_1_Hypsibius_dujardini_scaffold18240	Methyltransf_5	7.3e-90
	Raw assembly by Boothby et al. (2015)	gi_957787411_gb_LMYF01000769_1_Hypsibius_dujardini_scaffold898	SecG	1.8e-27
	Raw assembly by Boothby et al. (2015)	gi_957785216_gb_LMYF01002964_1_Hypsibius_dujardini_scaffold3197	B5	1.5e-17
	Raw assembly by Boothby et al. (2015)	gi_957788165_gb_LMYF01000015_1_Hypsibius_dujardini_scaffold17	Ribosomal_L18e	3.2e-27
	Raw assembly by Boothby et al. (2015)	gi_957784348_gb_LMYF01003832_1_Hypsibius_dujardini_scaffold4111	Ribosomal_L16	3.7e-21
	Raw assembly by Boothby et al. (2015)	gi_957785216_gb_LMYF01002964_1_Hypsibius_dujardini_scaffold3197	GMP_synt_C	2.3e-43
	Raw assembly by Boothby et al. (2015)	gi_957788178_gb_LMYF01000002_1_Hypsibius_dujardini_scaffold2	S-AdoMet_synt_C	1.2e-63
	Raw assembly by Boothby et al. (2015)	gi_957782896_gb_LMYF01005284_1_Hypsibius_dujardini_scaffold5625	Ribosomal_L21p	4.6e-31
	Raw assembly by Boothby et al. (2015)	gi_957781401_gb_LMYF01006779_1_Hypsibius_dujardini_scaffold7227	THF_DHG_CYH_C	4.2e-65
	Raw assembly by Boothby et al. (2015)	gi_957787456_gb_LMYF01000724_1_Hypsibius_dujardini_scaffold847	PseudoU_synth_1	3e-14
	Raw assembly by Boothby et al. (2015)	gi_957768480_gb_LMYF01016119_1_Hypsibius_dujardini_scaffold18596	IF3_C	3.8e-39
	Raw assembly by Boothby et al. (2015)	gi_957788177_gb_LMYF01000003_1_Hypsibius_dujardini_scaffold3	Competence	1.7e-46
	Raw assembly by Boothby et al. (2015)	gi_957771709_gb_LMYF01012890_1_Hypsibius_dujardini_scaffold14635	S-AdoMet_synt_M	1.1e-09
	Raw assembly by Boothby et al. (2015)	gi_957774085_gb_LMYF01010514_1_Hypsibius_dujardini_scaffold11733	RNA_pol_Rpb2_7	3.1e-20
	Raw assembly by Boothby et al. (2015)	gi_957785220_gb_LMYF01002960_1_Hypsibius_dujardini_scaffold3193	Ribosomal_L9_C	1.4e-20
	Raw assembly by Boothby et al. (2015)	gi_957788177_gb_LMYF01000003_1_Hypsibius_dujardini_scaffold3	RecA	2e-159
	Raw assembly by Boothby et al. (2015)	gi_957788114_gb_LMYF01000066_1_Hypsibius_dujardini_scaffold84	SecG	6.7e-12
	Raw assembly by Boothby et al. (2015)	gi_957784651_gb_LMYF01003529_1_Hypsibius_dujardini_scaffold3792	IF3_C	6.8e-24
	Raw assembly by Boothby et al. (2015)	gi_957788172_gb_LMYF01000008_1_Hypsibius_dujardini_scaffold8	Flavokinase	6.7e-40
	Raw assembly by Boothby et al. (2015)	gi_957788175_gb_LMYF01000005_1_Hypsibius_dujardini_scaffold5	Ribosomal_S19	3.4e-40
	Raw assembly by Boothby et al. (2015)	gi_957772972_gb_LMYF01011627_1_Hypsibius_dujardini_scaffold13088	Ribosomal_L2	3.5e-36
	Raw assembly by Boothby et al. (2015)	gi_957779744_gb_LMYF01008436_1_Hypsibius_dujardini_scaffold9178	SRP_SPB	1.9e-13
	Raw assembly by Boothby et al. (2015)	gi_957788175_gb_LMYF01000005_1_Hypsibius_dujardini_scaffold5	Ribosomal_S3_C	2e-31
	Raw assembly by Boothby et al. (2015)	gi_957774085_gb_LMYF01010514_1_Hypsibius_dujardini_scaffold11733	RNA_pol_Rpb2_6	8.7e-42
	Raw assembly by Boothby et al. (2015)	gi_957781770_gb_LMYF01006410_1_Hypsibius_dujardini_scaffold6823	Ribosomal_L10	1.3e-15
	Raw assembly by Boothby et al. (2015)	gi_957783765_gb_LMYF01004415_1_Hypsibius_dujardini_scaffold4718	Ribosomal_L6	1.6e-28
	Raw assembly by Boothby et al. (2015)	gi_957784881_gb_LMYF01003299_1_Hypsibius_dujardini_scaffold3550	SecG	2.3e-13
	Raw assembly by Boothby et al. (2015)	gi_957781770_gb_LMYF01006410_1_Hypsibius_dujardini_scaffold6823	Ribosomal_L11	3.9e-31
	Raw assembly by Boothby et al. (2015)	gi_957782202_gb_LMYF01005978_1_Hypsibius_dujardini_scaffold6355	Ribosomal_L18e	2.7e-13
	Raw assembly by Boothby et al. (2015)	gi_957783765_gb_LMYF01004415_1_Hypsibius_dujardini_scaffold4718	Ribosomal_S5_C	1.3e-32
	Raw assembly by Boothby et al. (2015)	gi_957768699_gb_LMYF01015900_1_Hypsibius_dujardini_scaffold18321	Ribosomal_L32p	3.2e-26
	Raw assembly by Boothby et al. (2015)	gi_957782387_gb_LMYF01005793_1_Hypsibius_dujardini_scaffold6164	Oligomerisation	1.3e-09
	Raw assembly by Boothby et al. (2015)	gi_957781568_gb_LMYF01006612_1_Hypsibius_dujardini_scaffold7041	Ribosomal_S8	8.5e-48
	Raw assembly by Boothby et al. (2015)	gi_957788174_gb_LMYF01000006_1_Hypsibius_dujardini_scaffold6	Ribosom_S12_S23	1.3e-55
	Raw assembly by Boothby et al. (2015)	gi_957779990_gb_LMYF01008190_1_Hypsibius_dujardini_scaffold8866	MurB_C	1.6e-27
	Raw assembly by Boothby et al. (2015)	gi_957788171_gb_LMYF01000009_1_Hypsibius_dujardini_scaffold9	Ribosomal_S18	6.1e-27
	Raw assembly by Boothby et al. (2015)	gi_957788174_gb_LMYF01000006_1_Hypsibius_dujardini_scaffold6	Ribosomal_S10	7.9e-41
	Raw assembly by Boothby et al. (2015)	gi_957762231_gb_LMYF01022368_1_Hypsibius_dujardini_scaffold26124	CTP_synth_N	9.2e-71
	Raw assembly by Boothby et al. (2015)	gi_957780378_gb_LMYF01007802_1_Hypsibius_dujardini_scaffold8406	Ribosomal_S20p	5.3e-24
	Raw assembly by Boothby et al. (2015)	gi_957781770_gb_LMYF01006410_1_Hypsibius_dujardini_scaffold6823	SecE	1.3e-14
	Raw assembly by Boothby et al. (2015)	gi_957786851_gb_LMYF01001329_1_Hypsibius_dujardini_scaffold1492	SecG	6.7e-12
	Raw assembly by Boothby et al. (2015)	gi_957788171_gb_LMYF01000009_1_Hypsibius_dujardini_scaffold9	Cytidylate_kin	3e-46
	Raw assembly by Boothby et al. (2015)	gi_957788174_gb_LMYF01000006_1_Hypsibius_dujardini_scaffold6	RNA_pol_Rpb2_7	3.4e-31
	Raw assembly by Boothby et al. (2015)	gi_957788179_gb_LMYF01000001_1_Hypsibius_dujardini_scaffold1	SRP_SPB	3.7e-35
	Raw assembly by Boothby et al. (2015)	gi_957788171_gb_LMYF01000009_1_Hypsibius_dujardini_scaffold9	FAD_syn	6.4e-49
	Raw assembly by Boothby et al. (2015)	gi_957788175_gb_LMYF01000005_1_Hypsibius_dujardini_scaffold5	Ribosomal_L2_C	2e-54
	Raw assembly by Boothby et al. (2015)	gi_957772972_gb_LMYF01011627_1_Hypsibius_dujardini_scaffold13088	Ribosomal_L4	1.1e-62
	Raw assembly by Boothby et al. (2015)	gi_957785548_gb_LMYF01002632_1_Hypsibius_dujardini_scaffold2845	Toprim_N	1.4e-09
	Raw assembly by Boothby et al. (2015)	gi_957779904_gb_LMYF01008276_1_Hypsibius_dujardini_scaffold8972	Trigger_C	2.1e-43
	Raw assembly by Boothby et al. (2015)	gi_957788179_gb_LMYF01000001_1_Hypsibius_dujardini_scaffold1	Trigger_C	3.7e-14
	Raw assembly by Boothby et al. (2015)	gi_957785717_gb_LMYF01002463_1_Hypsibius_dujardini_scaffold2670	IPPT	1.8e-67
	Raw assembly by Boothby et al. (2015)	gi_957768975_gb_LMYF01015624_1_Hypsibius_dujardini_scaffold17979	Ribosomal_S2	1e-84
	Raw assembly by Boothby et al. (2015)	gi_957786798_gb_LMYF01001382_1_Hypsibius_dujardini_scaffold1545	RNA_pol_Rpb2_1	2.3e-30
	Raw assembly by Boothby et al. (2015)	gi_957780139_gb_LMYF01008041_1_Hypsibius_dujardini_scaffold8686	Ribosomal_L29	4.6e-13
	Raw assembly by Boothby et al. (2015)	gi_957785717_gb_LMYF01002463_1_Hypsibius_dujardini_scaffold2670	eIF-1a	2e-28
	Raw assembly by Boothby et al. (2015)	gi_957768581_gb_LMYF01016018_1_Hypsibius_dujardini_scaffold18474	tRNA-synt_2d	3.6e-89
	Raw assembly by Boothby et al. (2015)	gi_957772295_gb_LMYF01012304_1_Hypsibius_dujardini_scaffold13911	THF_DHG_CYH_C	1.3e-68
	Raw assembly by Boothby et al. (2015)	gi_957786798_gb_LMYF01001382_1_Hypsibius_dujardini_scaffold1545	RNA_pol_Rpb2_3	1e-21
	Raw assembly by Boothby et al. (2015)	gi_957782677_gb_LMYF01005503_1_Hypsibius_dujardini_scaffold5855	UBA	8.2e-14
	Raw assembly by Boothby et al. (2015)	gi_957788173_gb_LMYF01000007_1_Hypsibius_dujardini_scaffold7	UvrC_HhH_N	4.4e-55
	Raw assembly by Boothby et al. (2015)	gi_957780591_gb_LMYF01007589_1_Hypsibius_dujardini_scaffold8148	RNA_pol_Rpb1_3	3.6e-20
	Raw assembly by Boothby et al. (2015)	gi_957788178_gb_LMYF01000002_1_Hypsibius_dujardini_scaffold2	TIM	2.9e-86
	Raw assembly by Boothby et al. (2015)	gi_957774806_gb_LMYF01009793_1_Hypsibius_dujardini_scaffold10846	FAD_syn	8e-54
	Raw assembly by Boothby et al. (2015)	gi_957786798_gb_LMYF01001382_1_Hypsibius_dujardini_scaffold1545	RNA_pol_Rpb2_6	2.2e-28
	Raw assembly by Boothby et al. (2015)	gi_957783288_gb_LMYF01004892_1_Hypsibius_dujardini_scaffold5215	RecA	1.5e-160
	Raw assembly by Boothby et al. (2015)	gi_957780591_gb_LMYF01007589_1_Hypsibius_dujardini_scaffold8148	RNA_pol_Rpb1_4	6.1e-41
	Raw assembly by Boothby et al. (2015)	gi_957788178_gb_LMYF01000002_1_Hypsibius_dujardini_scaffold2	YchF-GTPase_C	1.1e-44
	Raw assembly by Boothby et al. (2015)	gi_957788179_gb_LMYF01000001_1_Hypsibius_dujardini_scaffold1	Ribosomal_L19	5.8e-42
	Raw assembly by Boothby et al. (2015)	gi_957783765_gb_LMYF01004415_1_Hypsibius_dujardini_scaffold4718	Ribosomal_L14	6e-48
	Raw assembly by Boothby et al. (2015)	gi_957787290_gb_LMYF01000890_1_Hypsibius_dujardini_scaffold1029	EF_TS	4.2e-55
	Raw assembly by Boothby et al. (2015)	gi_957770838_gb_LMYF01013761_1_Hypsibius_dujardini_scaffold15713	Ribosomal_L28	4.8e-19
	Raw assembly by Boothby et al. (2015)	gi_957785717_gb_LMYF01002463_1_Hypsibius_dujardini_scaffold2670	Ribosomal_S11	1.3e-43
	Raw assembly by Boothby et al. (2015)	gi_957783765_gb_LMYF01004415_1_Hypsibius_dujardini_scaffold4718	Ribosomal_L5	6.2e-13
	Raw assembly by Boothby et al. (2015)	gi_957787950_gb_LMYF01000230_1_Hypsibius_dujardini_scaffold287	IPPT	3.2e-79
	Raw assembly by Boothby et al. (2015)	gi_957784625_gb_LMYF01003555_1_Hypsibius_dujardini_scaffold3818	Ribosomal_L35p	1.7e-12
	Raw assembly by Boothby et al. (2015)	gi_957786679_gb_LMYF01001501_1_Hypsibius_dujardini_scaffold1669	PseudoU_synth_1	9.7e-15
	Raw assembly by Boothby et al. (2015)	gi_957787850_gb_LMYF01000330_1_Hypsibius_dujardini_scaffold404	RNA_pol_A_bac	4.6e-20
	Raw assembly by Boothby et al. (2015)	gi_957784625_gb_LMYF01003555_1_Hypsibius_dujardini_scaffold3818	IF3_N	2.5e-26
	Raw assembly by Boothby et al. (2015)	gi_957764491_gb_LMYF01020108_1_Hypsibius_dujardini_scaffold23431	SmpB	1.7e-30
	Raw assembly by Boothby et al. (2015)	gi_957788179_gb_LMYF01000001_1_Hypsibius_dujardini_scaffold1	FDX-ACB	7.6e-30
	Raw assembly by Boothby et al. (2015)	gi_957773875_gb_LMYF01010724_1_Hypsibius_dujardini_scaffold11989	UPF0054	3.3e-35
	Raw assembly by Boothby et al. (2015)	gi_957788179_gb_LMYF01000001_1_Hypsibius_dujardini_scaffold1	GrpE	4.5e-44
	Raw assembly by Boothby et al. (2015)	gi_957785717_gb_LMYF01002463_1_Hypsibius_dujardini_scaffold2670	RNA_pol_A_CTD	2e-25
	Raw assembly by Boothby et al. (2015)	gi_957788173_gb_LMYF01000007_1_Hypsibius_dujardini_scaffold7	Ribosomal_S9	2.7e-43
	Raw assembly by Boothby et al. (2015)	gi_957772696_gb_LMYF01011903_1_Hypsibius_dujardini_scaffold13414	GrpE	5.4e-38
	Raw assembly by Boothby et al. (2015)	gi_957788171_gb_LMYF01000009_1_Hypsibius_dujardini_scaffold9	PseudoU_synth_1	4.2e-23
	Raw assembly by Boothby et al. (2015)	gi_957780132_gb_LMYF01008048_1_Hypsibius_dujardini_scaffold8693	RNA_pol_Rpb2_3	8.3e-29
	Raw assembly by Boothby et al. (2015)	gi_957788177_gb_LMYF01000003_1_Hypsibius_dujardini_scaffold3	CTP_synth_N	2.8e-130
	Raw assembly by Boothby et al. (2015)	gi_957781220_gb_LMYF01006960_1_Hypsibius_dujardini_scaffold7434	CoaE	2.4e-49
	Raw assembly by Boothby et al. (2015)	gi_957787781_gb_LMYF01000399_1_Hypsibius_dujardini_scaffold484	Enolase_C	3.8e-135
	Raw assembly by Boothby et al. (2015)	gi_957765117_gb_LMYF01019482_1_Hypsibius_dujardini_scaffold22688	RNA_pol_A_bac	3.2e-12
	Raw assembly by Boothby et al. (2015)	gi_957773629_gb_LMYF01010970_1_Hypsibius_dujardini_scaffold12284	Ribosomal_S10	1.2e-43
	Raw assembly by Boothby et al. (2015)	gi_957780686_gb_LMYF01007494_1_Hypsibius_dujardini_scaffold8037	Ribosomal_S11	6.7e-48
	Raw assembly by Boothby et al. (2015)	gi_957782355_gb_LMYF01005825_1_Hypsibius_dujardini_scaffold6197	CTP_synth_N	5.8e-129
	Raw assembly by Boothby et al. (2015)	gi_957788178_gb_LMYF01000002_1_Hypsibius_dujardini_scaffold2	LepA_C	1.4e-54
	Raw assembly by Boothby et al. (2015)	gi_957788171_gb_LMYF01000009_1_Hypsibius_dujardini_scaffold9	Flavokinase	2.5e-42
	Raw assembly by Boothby et al. (2015)	gi_957788079_gb_LMYF01000101_1_Hypsibius_dujardini_scaffold131	tRNA-synt_2d	1.1e-104
	Raw assembly by Boothby et al. (2015)	gi_957783303_gb_LMYF01004877_1_Hypsibius_dujardini_scaffold5200	Enolase_C	2.9e-129
	Raw assembly by Boothby et al. (2015)	gi_957782677_gb_LMYF01005503_1_Hypsibius_dujardini_scaffold5855	RRF	1.7e-15
	Raw assembly by Boothby et al. (2015)	gi_957780591_gb_LMYF01007589_1_Hypsibius_dujardini_scaffold8148	RNA_pol_Rpb1_3	3.7e-15
	Raw assembly by Boothby et al. (2015)	gi_957765985_gb_LMYF01018614_1_Hypsibius_dujardini_scaffold21640	tRNA-synt_1d	5.6e-71
	Raw assembly by Boothby et al. (2015)	gi_957788171_gb_LMYF01000009_1_Hypsibius_dujardini_scaffold9	SmpB	1e-27
	Raw assembly by Boothby et al. (2015)	gi_957784155_gb_LMYF01004025_1_Hypsibius_dujardini_scaffold4314	Ribosomal_S19	3.2e-37
	Raw assembly by Boothby et al. (2015)	gi_957766804_gb_LMYF01017795_1_Hypsibius_dujardini_scaffold20640	dsrm	7.2e-13
	Raw assembly by Boothby et al. (2015)	gi_957773854_gb_LMYF01010745_1_Hypsibius_dujardini_scaffold12010	Ribosomal_S16	3.4e-20
	Raw assembly by Boothby et al. (2015)	gi_957784155_gb_LMYF01004025_1_Hypsibius_dujardini_scaffold4314	Ribosomal_S3_C	2.9e-28
	Raw assembly by Boothby et al. (2015)	gi_957783615_gb_LMYF01004565_1_Hypsibius_dujardini_scaffold4876	zf-C4_ClpX	1.7e-16
	Raw assembly by Boothby et al. (2015)	gi_957780132_gb_LMYF01008048_1_Hypsibius_dujardini_scaffold8693	RNA_pol_Rpb2_2	1.4e-36
	Raw assembly by Boothby et al. (2015)	gi_957787415_gb_LMYF01000765_1_Hypsibius_dujardini_scaffold892	Flavokinase	2.2e-30
	Raw assembly by Boothby et al. (2015)	gi_957786798_gb_LMYF01001382_1_Hypsibius_dujardini_scaffold1545	RNA_pol_Rpb2_7	3.3e-20
	Raw assembly by Boothby et al. (2015)	gi_957787944_gb_LMYF01000236_1_Hypsibius_dujardini_scaffold293	IF-2	1.2e-14
	Raw assembly by Boothby et al. (2015)	gi_957786993_gb_LMYF01001187_1_Hypsibius_dujardini_scaffold1342	Enolase_N	6.1e-21
	Raw assembly by Boothby et al. (2015)	gi_957765259_gb_LMYF01019340_1_Hypsibius_dujardini_scaffold22525	Ribosomal_L5	5.1e-23
	Raw assembly by Boothby et al. (2015)	gi_957787436_gb_LMYF01000744_1_Hypsibius_dujardini_scaffold868	RNA_pol_Rpb1_2	1e-21
	Raw assembly by Boothby et al. (2015)	gi_957788174_gb_LMYF01000006_1_Hypsibius_dujardini_scaffold6	RNA_pol_Rpb2_3	6.8e-30
	Raw assembly by Boothby et al. (2015)	gi_957784130_gb_LMYF01004050_1_Hypsibius_dujardini_scaffold4340	IF-2	7.5e-41
	Raw assembly by Boothby et al. (2015)	gi_957788157_gb_LMYF01000023_1_Hypsibius_dujardini_scaffold26	IPPT	8.8e-75
	Raw assembly by Boothby et al. (2015)	gi_957788179_gb_LMYF01000001_1_Hypsibius_dujardini_scaffold1	Ribosomal_L9_N	2e-23
	Raw assembly by Boothby et al. (2015)	gi_957788174_gb_LMYF01000006_1_Hypsibius_dujardini_scaffold6	RNA_pol_Rpb2_2	6.3e-22
	Raw assembly by Boothby et al. (2015)	gi_957785160_gb_LMYF01003020_1_Hypsibius_dujardini_scaffold3257	DNA_pol3_beta_2	1.4e-39
	Raw assembly by Boothby et al. (2015)	gi_957767882_gb_LMYF01016717_1_Hypsibius_dujardini_scaffold19348	dsrm	2e-16
	Raw assembly by Boothby et al. (2015)	gi_957765290_gb_LMYF01019309_1_Hypsibius_dujardini_scaffold22490	Ribosomal_L13	1.1e-55
	Raw assembly by Boothby et al. (2015)	gi_957773629_gb_LMYF01010970_1_Hypsibius_dujardini_scaffold12284	Ribosomal_L4	1.7e-60
	Raw assembly by Boothby et al. (2015)	gi_957787850_gb_LMYF01000330_1_Hypsibius_dujardini_scaffold404	Ribosomal_L17	1e-34
	Raw assembly by Boothby et al. (2015)	gi_957788178_gb_LMYF01000002_1_Hypsibius_dujardini_scaffold2	IF3_N	9.5e-33
	Raw assembly by Boothby et al. (2015)	gi_957781167_gb_LMYF01007013_1_Hypsibius_dujardini_scaffold7491	SecE	2.8e-14
	Raw assembly by Boothby et al. (2015)	gi_957780591_gb_LMYF01007589_1_Hypsibius_dujardini_scaffold8148	RNA_pol_Rpb1_5	7.7e-36
	Raw assembly by Boothby et al. (2015)	gi_957783765_gb_LMYF01004415_1_Hypsibius_dujardini_scaffold4718	SecY	8.5e-104
	Raw assembly by Boothby et al. (2015)	gi_957788178_gb_LMYF01000002_1_Hypsibius_dujardini_scaffold2	Ribosomal_L35p	6.8e-23
	Raw assembly by Boothby et al. (2015)	gi_957769685_gb_LMYF01014914_1_Hypsibius_dujardini_scaffold17124	Peptidase_A8	2.5e-41
	Raw assembly by Boothby et al. (2015)	gi_957786844_gb_LMYF01001336_1_Hypsibius_dujardini_scaffold1499	RNA_pol_Rpb1_1	1.7e-96
	Raw assembly by Boothby et al. (2015)	gi_957787850_gb_LMYF01000330_1_Hypsibius_dujardini_scaffold404	Ribosomal_S4	6e-23
	Raw assembly by Boothby et al. (2015)	gi_957788179_gb_LMYF01000001_1_Hypsibius_dujardini_scaffold1	THF_DHG_CYH_C	7.1e-71
	Raw assembly by Boothby et al. (2015)	gi_957788179_gb_LMYF01000001_1_Hypsibius_dujardini_scaffold1	Ribosomal_L11_N	1.4e-31
	Raw assembly by Boothby et al. (2015)	gi_957783107_gb_LMYF01005073_1_Hypsibius_dujardini_scaffold5405	Peptidase_A8	2.1e-47
	Raw assembly by Boothby et al. (2015)	gi_957784021_gb_LMYF01004159_1_Hypsibius_dujardini_scaffold4453	MurB_C	4.6e-30
	Raw assembly by Boothby et al. (2015)	gi_957780522_gb_LMYF01007658_1_Hypsibius_dujardini_scaffold8237	Ribosomal_S15	2.2e-28
	Raw assembly by Boothby et al. (2015)	gi_957775186_gb_LMYF01009413_1_Hypsibius_dujardini_scaffold10377	Ribosomal_L13	2.9e-51
	Raw assembly by Boothby et al. (2015)	gi_957771407_gb_LMYF01013192_1_Hypsibius_dujardini_scaffold15016	RuvA_C	1e-11
	Raw assembly by Boothby et al. (2015)	gi_957781903_gb_LMYF01006277_1_Hypsibius_dujardini_scaffold6681	eIF-1a	1.9e-27
	Raw assembly by Boothby et al. (2015)	gi_957773629_gb_LMYF01010970_1_Hypsibius_dujardini_scaffold12284	Ribosomal_L23	2.8e-26
	Raw assembly by Boothby et al. (2015)	gi_957780025_gb_LMYF01008155_1_Hypsibius_dujardini_scaffold8820	RNA_pol_A_bac	6.4e-17
	Raw assembly by Boothby et al. (2015)	gi_957772331_gb_LMYF01012268_1_Hypsibius_dujardini_scaffold13865	Ribosomal_S13	6.9e-22
	Raw assembly by Boothby et al. (2015)	gi_957787843_gb_LMYF01000337_1_Hypsibius_dujardini_scaffold411	RNA_pol_Rpb1_2	1e-21
	Raw assembly by Boothby et al. (2015)	gi_957788126_gb_LMYF01000054_1_Hypsibius_dujardini_scaffold68	EF_TS	6.1e-16
	Raw assembly by Boothby et al. (2015)	gi_957772831_gb_LMYF01011768_1_Hypsibius_dujardini_scaffold13247	Ribosomal_L35p	4.6e-12
	Raw assembly by Boothby et al. (2015)	gi_957788174_gb_LMYF01000006_1_Hypsibius_dujardini_scaffold6	RNA_pol_Rpb1_1	2.3e-89
	Raw assembly by Boothby et al. (2015)	gi_957785760_gb_LMYF01002420_1_Hypsibius_dujardini_scaffold2627	RuvA_N	3.5e-19
	Raw assembly by Boothby et al. (2015)	gi_957787415_gb_LMYF01000765_1_Hypsibius_dujardini_scaffold892	FAD_syn	9.8e-32
	Raw assembly by Boothby et al. (2015)	gi_957784109_gb_LMYF01004071_1_Hypsibius_dujardini_scaffold4361	Ribosomal_S15	7.3e-10
	Raw assembly by Boothby et al. (2015)	gi_957788174_gb_LMYF01000006_1_Hypsibius_dujardini_scaffold6	RNA_pol_Rpb1_2	1.2e-53
	Raw assembly by Boothby et al. (2015)	gi_957765985_gb_LMYF01018614_1_Hypsibius_dujardini_scaffold21640	Arg_tRNA_synt_N	1.1e-19
	Raw assembly by Boothby et al. (2015)	gi_957765259_gb_LMYF01019340_1_Hypsibius_dujardini_scaffold22525	Ribosomal_L29	6.4e-23
	Raw assembly by Boothby et al. (2015)	gi_957765259_gb_LMYF01019340_1_Hypsibius_dujardini_scaffold22525	Ribosomal_L14	4.3e-55
	Raw assembly by Boothby et al. (2015)	gi_957763278_gb_LMYF01021321_1_Hypsibius_dujardini_scaffold24877	SecG	1.1e-28
	Raw assembly by Boothby et al. (2015)	gi_957771012_gb_LMYF01013587_1_Hypsibius_dujardini_scaffold15504	zf-C4_ClpX	9.2e-19
	Raw assembly by Boothby et al. (2015)	gi_957773629_gb_LMYF01010970_1_Hypsibius_dujardini_scaffold12284	Ribosomal_L29	2.1e-23
	Raw assembly by Boothby et al. (2015)	gi_957764375_gb_LMYF01020224_1_Hypsibius_dujardini_scaffold23573	DNA_pol3_beta	1.4e-37
	Raw assembly by Boothby et al. (2015)	gi_957773922_gb_LMYF01010677_1_Hypsibius_dujardini_scaffold11939	RNA_pol_Rpb1_4	2.6e-17
	Raw assembly by Boothby et al. (2015)	gi_957781548_gb_LMYF01006632_1_Hypsibius_dujardini_scaffold7061	RNA_pol_Rpb2_6	2.8e-68
	Raw assembly by Boothby et al. (2015)	gi_957786993_gb_LMYF01001187_1_Hypsibius_dujardini_scaffold1342	Enolase_C	1.4e-50
	Raw assembly by Boothby et al. (2015)	gi_957775245_gb_LMYF01009354_1_Hypsibius_dujardini_scaffold10305	RimM	1.7e-17
	Raw assembly by Boothby et al. (2015)	gi_957773629_gb_LMYF01010970_1_Hypsibius_dujardini_scaffold12284	Ribosomal_S19	9.1e-36
	Raw assembly by Boothby et al. (2015)	gi_957788159_gb_LMYF01000021_1_Hypsibius_dujardini_scaffold23	YchF-GTPase_C	3.5e-44
	Raw assembly by Boothby et al. (2015)	gi_957785160_gb_LMYF01003020_1_Hypsibius_dujardini_scaffold3257	DNA_pol3_beta	2.8e-37
	Raw assembly by Boothby et al. (2015)	gi_957768310_gb_LMYF01016289_1_Hypsibius_dujardini_scaffold18816	RRF	6e-64
	Raw assembly by Boothby et al. (2015)	gi_957773629_gb_LMYF01010970_1_Hypsibius_dujardini_scaffold12284	Ribosomal_S3_C	9.2e-35
	Raw assembly by Boothby et al. (2015)	gi_957783288_gb_LMYF01004892_1_Hypsibius_dujardini_scaffold5215	Ribosomal_S16	1.6e-25
	Raw assembly by Boothby et al. (2015)	gi_957788159_gb_LMYF01000021_1_Hypsibius_dujardini_scaffold23	LepA_C	6e-54
	Raw assembly by Boothby et al. (2015)	gi_957769393_gb_LMYF01015206_1_Hypsibius_dujardini_scaffold17481	Ribosomal_L2_C	3.7e-55
	Raw assembly by Boothby et al. (2015)	gi_957787843_gb_LMYF01000337_1_Hypsibius_dujardini_scaffold411	RNA_pol_Rpb1_5	4.9e-33
	Raw assembly by Boothby et al. (2015)	gi_957778953_gb_LMYF01009227_1_Hypsibius_dujardini_scaffold10137	PGK	7.4e-154
	Raw assembly by Boothby et al. (2015)	gi_957766983_gb_LMYF01017616_1_Hypsibius_dujardini_scaffold20423	RNA_pol_Rpb2_3	3e-22
	Raw assembly by Boothby et al. (2015)	gi_957767922_gb_LMYF01016677_1_Hypsibius_dujardini_scaffold19304	Pept_tRNA_hydro	2.1e-59
	Raw assembly by Boothby et al. (2015)	gi_957787181_gb_LMYF01000999_1_Hypsibius_dujardini_scaffold1145	RNA_pol_Rpb2_3	9.4e-20
	Raw assembly by Boothby et al. (2015)	gi_957788175_gb_LMYF01000005_1_Hypsibius_dujardini_scaffold5	Ribosomal_L4	3e-54
	Raw assembly by Boothby et al. (2015)	gi_957788157_gb_LMYF01000023_1_Hypsibius_dujardini_scaffold26	TruB_N	5.3e-55
	Raw assembly by Boothby et al. (2015)	gi_957771874_gb_LMYF01012725_1_Hypsibius_dujardini_scaffold14435	Ribosomal_S9	4.4e-43
	Raw assembly by Boothby et al. (2015)	gi_957779548_gb_LMYF01008632_1_Hypsibius_dujardini_scaffold9409	Oligomerisation	1.9e-33
	Raw assembly by Boothby et al. (2015)	gi_957787181_gb_LMYF01000999_1_Hypsibius_dujardini_scaffold1145	RNA_pol_Rpb2_1	7.2e-38
	Raw assembly by Boothby et al. (2015)	gi_957787993_gb_LMYF01000187_1_Hypsibius_dujardini_scaffold237	Ribosomal_L20	1.8e-43
	Raw assembly by Boothby et al. (2015)	gi_957786443_gb_LMYF01001737_1_Hypsibius_dujardini_scaffold1917	Ribosomal_L21p	6.3e-30
	Raw assembly by Boothby et al. (2015)	gi_957772733_gb_LMYF01011866_1_Hypsibius_dujardini_scaffold13370	dsrm	1.4e-10
	Raw assembly by Boothby et al. (2015)	gi_957788169_gb_LMYF01000011_1_Hypsibius_dujardini_scaffold11	PGK	3.7e-153
	Raw assembly by Boothby et al. (2015)	gi_957788179_gb_LMYF01000001_1_Hypsibius_dujardini_scaffold1	Ribosomal_L18p	7.3e-39
	Raw assembly by Boothby et al. (2015)	gi_957773118_gb_LMYF01011481_1_Hypsibius_dujardini_scaffold12912	RecR	1.3e-14
	Raw assembly by Boothby et al. (2015)	gi_957786961_gb_LMYF01001219_1_Hypsibius_dujardini_scaffold1378	Ribosomal_L10	1.4e-19
	Raw assembly by Boothby et al. (2015)	gi_957787993_gb_LMYF01000187_1_Hypsibius_dujardini_scaffold237	TIM	3.3e-89
	Raw assembly by Boothby et al. (2015)	gi_957788179_gb_LMYF01000001_1_Hypsibius_dujardini_scaffold1	Ribosomal_S5_C	9.8e-32
	Raw assembly by Boothby et al. (2015)	gi_957788176_gb_LMYF01000004_1_Hypsibius_dujardini_scaffold4	DNA_pol3_beta	2.8e-32
	Raw assembly by Boothby et al. (2015)	gi_957788179_gb_LMYF01000001_1_Hypsibius_dujardini_scaffold1	SecY	2.8e-101
	Raw assembly by Boothby et al. (2015)	gi_957764314_gb_LMYF01020285_1_Hypsibius_dujardini_scaffold23642	THF_DHG_CYH	3.6e-11
	Raw assembly by Boothby et al. (2015)	gi_957788164_gb_LMYF01000016_1_Hypsibius_dujardini_scaffold18	tRNA_m1G_MT	4.5e-55
	Raw assembly by Boothby et al. (2015)	gi_957788176_gb_LMYF01000004_1_Hypsibius_dujardini_scaffold4	UvrB	1.5e-24
	Raw assembly by Boothby et al. (2015)	gi_957787959_gb_LMYF01000221_1_Hypsibius_dujardini_scaffold277	RNA_pol_Rpb1_5	7e-69
	Raw assembly by Boothby et al. (2015)	gi_957788176_gb_LMYF01000004_1_Hypsibius_dujardini_scaffold4	NusA_N	2.3e-31
	Raw assembly by Boothby et al. (2015)	gi_957785293_gb_LMYF01002887_1_Hypsibius_dujardini_scaffold3114	MurB_C	1.9e-32
	Raw assembly by Boothby et al. (2015)	gi_957785707_gb_LMYF01002473_1_Hypsibius_dujardini_scaffold2680	GAD	3.3e-11
	Raw assembly by Boothby et al. (2015)	gi_957785744_gb_LMYF01002436_1_Hypsibius_dujardini_scaffold2643	tRNA-synt_1d	1.6e-32
	Raw assembly by Boothby et al. (2015)	gi_957785972_gb_LMYF01002208_1_Hypsibius_dujardini_scaffold2411	Ribosomal_S15	2.8e-24
	Raw assembly by Boothby et al. (2015)	gi_957786877_gb_LMYF01001303_1_Hypsibius_dujardini_scaffold1465	Ribosomal_L11	7e-14
	Raw assembly by Boothby et al. (2015)	gi_957770683_gb_LMYF01013916_1_Hypsibius_dujardini_scaffold15899	GTP1_OBG	3.8e-64
	Raw assembly by Boothby et al. (2015)	gi_957779665_gb_LMYF01008515_1_Hypsibius_dujardini_scaffold9272	Ribosomal_L19	7.5e-41
	Raw assembly by Boothby et al. (2015)	gi_957771954_gb_LMYF01012645_1_Hypsibius_dujardini_scaffold14331	CoaE	2.2e-43
	Raw assembly by Boothby et al. (2015)	gi_957788176_gb_LMYF01000004_1_Hypsibius_dujardini_scaffold4	Phe_tRNA-synt_N	1.2e-16
	Raw assembly by Boothby et al. (2015)	gi_957774156_gb_LMYF01010443_1_Hypsibius_dujardini_scaffold11644	SmpB	5.3e-29
	Raw assembly by Boothby et al. (2015)	gi_957774018_gb_LMYF01010581_1_Hypsibius_dujardini_scaffold11819	Enolase_C	3.1e-47
	Raw assembly by Boothby et al. (2015)	gi_957788175_gb_LMYF01000005_1_Hypsibius_dujardini_scaffold5	Ribosomal_L32p	1.3e-11
	Raw assembly by Boothby et al. (2015)	gi_957787171_gb_LMYF01001009_1_Hypsibius_dujardini_scaffold1155	S-AdoMet_synt_M	2e-47
	Raw assembly by Boothby et al. (2015)	gi_957788176_gb_LMYF01000004_1_Hypsibius_dujardini_scaffold4	Ribonuclease_P	1.6e-23
	Raw assembly by Boothby et al. (2015)	gi_957780132_gb_LMYF01008048_1_Hypsibius_dujardini_scaffold8693	RNA_pol_Rpb1_2	3.4e-12
	Raw assembly by Boothby et al. (2015)	gi_957780823_gb_LMYF01007357_1_Hypsibius_dujardini_scaffold7876	Ribosomal_S5_C	5.8e-10
	Raw assembly by Boothby et al. (2015)	gi_957788175_gb_LMYF01000005_1_Hypsibius_dujardini_scaffold5	YchF-GTPase_C	2.2e-43
	Raw assembly by Boothby et al. (2015)	gi_957786929_gb_LMYF01001251_1_Hypsibius_dujardini_scaffold1411	RRF	7.9e-65
	Raw assembly by Boothby et al. (2015)	gi_957783939_gb_LMYF01004241_1_Hypsibius_dujardini_scaffold4539	RNA_pol_Rpb1_4	7.1e-18
	Raw assembly by Boothby et al. (2015)	gi_957781758_gb_LMYF01006422_1_Hypsibius_dujardini_scaffold6836	IF2_N	2.2e-19
	Raw assembly by Boothby et al. (2015)	gi_957781857_gb_LMYF01006323_1_Hypsibius_dujardini_scaffold6730	RBFA	6.4e-27
	Raw assembly by Boothby et al. (2015)	gi_957767059_gb_LMYF01017540_1_Hypsibius_dujardini_scaffold20332	dsrm	3.9e-10
	Raw assembly by Boothby et al. (2015)	gi_957769393_gb_LMYF01015206_1_Hypsibius_dujardini_scaffold17481	Ribosomal_L4	2.1e-28
	Raw assembly by Boothby et al. (2015)	gi_957764968_gb_LMYF01019631_1_Hypsibius_dujardini_scaffold22868	Ribosomal_S18	1.6e-22
	Raw assembly by Boothby et al. (2015)	gi_957781758_gb_LMYF01006422_1_Hypsibius_dujardini_scaffold6836	NusA_N	3e-27
	Raw assembly by Boothby et al. (2015)	gi_957781857_gb_LMYF01006323_1_Hypsibius_dujardini_scaffold6730	RimM	1.6e-18
	Raw assembly by Boothby et al. (2015)	gi_957788174_gb_LMYF01000006_1_Hypsibius_dujardini_scaffold6	Ribosomal_S16	3.3e-23
	Raw assembly by Boothby et al. (2015)	gi_957785232_gb_LMYF01002948_1_Hypsibius_dujardini_scaffold3179	S-AdoMet_synt_M	2.4e-49
	Raw assembly by Boothby et al. (2015)	gi_957771630_gb_LMYF01012969_1_Hypsibius_dujardini_scaffold14729	IF3_N	1.3e-26
	Raw assembly by Boothby et al. (2015)	gi_957765306_gb_LMYF01019293_1_Hypsibius_dujardini_scaffold22471	Arg_tRNA_synt_N	1.2e-23
	Raw assembly by Boothby et al. (2015)	gi_957773253_gb_LMYF01011346_1_Hypsibius_dujardini_scaffold12741	DNA_pol3_beta	5.4e-32
	Raw assembly by Boothby et al. (2015)	gi_957781758_gb_LMYF01006422_1_Hypsibius_dujardini_scaffold6836	Flavokinase	1.3e-37
	Raw assembly by Boothby et al. (2015)	gi_957768450_gb_LMYF01016149_1_Hypsibius_dujardini_scaffold18633	Ribosomal_S13	7.5e-14
	Raw assembly by Boothby et al. (2015)	gi_957769719_gb_LMYF01014880_1_Hypsibius_dujardini_scaffold17086	RRF	1.9e-47
	Raw assembly by Boothby et al. (2015)	gi_957774090_gb_LMYF01010509_1_Hypsibius_dujardini_scaffold11728	TRCF	5.2e-27
	Raw assembly by Boothby et al. (2015)	gi_957782603_gb_LMYF01005577_1_Hypsibius_dujardini_scaffold5934	Cons_hypoth95	7.4e-28
	Raw assembly by Boothby et al. (2015)	gi_957785369_gb_LMYF01002811_1_Hypsibius_dujardini_scaffold3033	THF_DHG_CYH_C	6.1e-27
	Raw assembly by Boothby et al. (2015)	gi_957781758_gb_LMYF01006422_1_Hypsibius_dujardini_scaffold6836	TruB_N	1.8e-58
	Raw assembly by Boothby et al. (2015)	gi_957783897_gb_LMYF01004283_1_Hypsibius_dujardini_scaffold4581	dsrm	2.9e-12
	Raw assembly by Boothby et al. (2015)	gi_957783415_gb_LMYF01004765_1_Hypsibius_dujardini_scaffold5085	Oligomerisation	5.5e-30
	Raw assembly by Boothby et al. (2015)	gi_957781248_gb_LMYF01006932_1_Hypsibius_dujardini_scaffold7404	Ribosomal_S3_C	1.7e-34
	Raw assembly by Boothby et al. (2015)	gi_957783182_gb_LMYF01004998_1_Hypsibius_dujardini_scaffold5327	Competence	2e-57
	Raw assembly by Boothby et al. (2015)	gi_957784881_gb_LMYF01003299_1_Hypsibius_dujardini_scaffold3550	UvrC_HhH_N	4.7e-61
	Raw assembly by Boothby et al. (2015)	gi_957780132_gb_LMYF01008048_1_Hypsibius_dujardini_scaffold8693	RNA_pol_Rpb2_1	2.3e-22
	Raw assembly by Boothby et al. (2015)	gi_957784554_gb_LMYF01003626_1_Hypsibius_dujardini_scaffold3894	RecR	2.8e-16
	Raw assembly by Boothby et al. (2015)	gi_957787181_gb_LMYF01000999_1_Hypsibius_dujardini_scaffold1145	RNA_pol_Rpb2_6	2.8e-68
	Raw assembly by Boothby et al. (2015)	gi_957779268_gb_LMYF01008912_1_Hypsibius_dujardini_scaffold9758	S-AdoMet_synt_C	6e-56
	Raw assembly by Boothby et al. (2015)	gi_957786500_gb_LMYF01001680_1_Hypsibius_dujardini_scaffold1856	Methyltransf_5	3.9e-95
	Raw assembly by Boothby et al. (2015)	gi_957781568_gb_LMYF01006612_1_Hypsibius_dujardini_scaffold7041	Ribosomal_L23	1.4e-26
	Raw assembly by Boothby et al. (2015)	gi_957788175_gb_LMYF01000005_1_Hypsibius_dujardini_scaffold5	Ribosomal_L5_C	1.4e-41
	Raw assembly by Boothby et al. (2015)	gi_957786926_gb_LMYF01001254_1_Hypsibius_dujardini_scaffold1414	dsrm	1.4e-10
	Raw assembly by Boothby et al. (2015)	gi_957773657_gb_LMYF01010942_1_Hypsibius_dujardini_scaffold12246	Ribosomal_L5	7.3e-21
	Raw assembly by Boothby et al. (2015)	gi_957788173_gb_LMYF01000007_1_Hypsibius_dujardini_scaffold7	RuvA_C	3.1e-12
	Raw assembly by Boothby et al. (2015)	gi_957773803_gb_LMYF01010796_1_Hypsibius_dujardini_scaffold12070	THF_DHG_CYH_C	2.2e-69
	Raw assembly by Boothby et al. (2015)	gi_957788171_gb_LMYF01000009_1_Hypsibius_dujardini_scaffold9	tRNA-synt_1d	1.4e-52
	Raw assembly by Boothby et al. (2015)	gi_957780139_gb_LMYF01008041_1_Hypsibius_dujardini_scaffold8686	Ribosomal_S5	2.8e-31
	Raw assembly by Boothby et al. (2015)	gi_957781770_gb_LMYF01006410_1_Hypsibius_dujardini_scaffold6823	RNA_pol_Rpb1_5	4.5e-50
	Raw assembly by Boothby et al. (2015)	gi_957788173_gb_LMYF01000007_1_Hypsibius_dujardini_scaffold7	B5	8.3e-18
	Raw assembly by Boothby et al. (2015)	gi_957780139_gb_LMYF01008041_1_Hypsibius_dujardini_scaffold8686	Ribosomal_L18p	8.4e-39
	Raw assembly by Boothby et al. (2015)	gi_957781770_gb_LMYF01006410_1_Hypsibius_dujardini_scaffold6823	RNA_pol_Rpb1_4	8e-15
	Raw assembly by Boothby et al. (2015)	gi_957773657_gb_LMYF01010942_1_Hypsibius_dujardini_scaffold12246	Ribosomal_L14	1.5e-57
	Raw assembly by Boothby et al. (2015)	gi_957783982_gb_LMYF01004198_1_Hypsibius_dujardini_scaffold4495	Ribosomal_S6	1.9e-30
	Raw assembly by Boothby et al. (2015)	gi_957786887_gb_LMYF01001293_1_Hypsibius_dujardini_scaffold1455	Peptidase_A8	2.4e-35
	Raw assembly by Boothby et al. (2015)	gi_957783283_gb_LMYF01004897_1_Hypsibius_dujardini_scaffold5220	CoaE	2e-42
	Raw assembly by Boothby et al. (2015)	gi_957762149_gb_LMYF01022450_1_Hypsibius_dujardini_scaffold26219	Pept_tRNA_hydro	4.4e-59
	Raw assembly by Boothby et al. (2015)	gi_957783982_gb_LMYF01004198_1_Hypsibius_dujardini_scaffold4495	Ribosomal_L9_C	3.1e-23
	Raw assembly by Boothby et al. (2015)	gi_957788173_gb_LMYF01000007_1_Hypsibius_dujardini_scaffold7	Trigger_C	1.5e-11
	Raw assembly by Boothby et al. (2015)	gi_957788177_gb_LMYF01000003_1_Hypsibius_dujardini_scaffold3	S-AdoMet_synt_M	1e-44
	Raw assembly by Boothby et al. (2015)	gi_957783970_gb_LMYF01004210_1_Hypsibius_dujardini_scaffold4507	Enolase_N	2e-60
	Raw assembly by Boothby et al. (2015)	gi_957786555_gb_LMYF01001625_1_Hypsibius_dujardini_scaffold1798	Enolase_N	1.1e-18
	Raw assembly by Boothby et al. (2015)	gi_957788177_gb_LMYF01000003_1_Hypsibius_dujardini_scaffold3	Flavokinase	1.7e-37
	Raw assembly by Boothby et al. (2015)	gi_957781376_gb_LMYF01006804_1_Hypsibius_dujardini_scaffold7254	RecA	9.7e-177
	Raw assembly by Boothby et al. (2015)	gi_957769868_gb_LMYF01014731_1_Hypsibius_dujardini_scaffold16901	THF_DHG_CYH	9.6e-17
	Raw assembly by Boothby et al. (2015)	gi_957780657_gb_LMYF01007523_1_Hypsibius_dujardini_scaffold8070	SecG	6.3e-11
	Raw assembly by Boothby et al. (2015)	gi_957788177_gb_LMYF01000003_1_Hypsibius_dujardini_scaffold3	Ribosomal_S6	2.3e-33
	Raw assembly by Boothby et al. (2015)	gi_957787857_gb_LMYF01000323_1_Hypsibius_dujardini_scaffold397	RBFA	1.3e-24
	Raw assembly by Boothby et al. (2015)	gi_957773658_gb_LMYF01010941_1_Hypsibius_dujardini_scaffold12245	dsrm	2.9e-12
	Raw assembly by Boothby et al. (2015)	gi_957788163_gb_LMYF01000017_1_Hypsibius_dujardini_scaffold19	RNA_pol_A_bac	1.4e-20
	Raw assembly by Boothby et al. (2015)	gi_957780139_gb_LMYF01008041_1_Hypsibius_dujardini_scaffold8686	Ribosomal_L5_C	5.2e-41
	Raw assembly by Boothby et al. (2015)	gi_957781248_gb_LMYF01006932_1_Hypsibius_dujardini_scaffold7404	Ribosomal_L2_C	6.5e-54
	Raw assembly by Boothby et al. (2015)	gi_957770029_gb_LMYF01014570_1_Hypsibius_dujardini_scaffold16703	DNA_pol3_beta_3	2.4e-34
	Raw assembly by Boothby et al. (2015)	gi_957774326_gb_LMYF01010273_1_Hypsibius_dujardini_scaffold11444	zf-C4_ClpX	1.7e-10
	Raw assembly by Boothby et al. (2015)	gi_957781248_gb_LMYF01006932_1_Hypsibius_dujardini_scaffold7404	Ribosomal_S17	1e-30
	Raw assembly by Boothby et al. (2015)	gi_957768435_gb_LMYF01016164_1_Hypsibius_dujardini_scaffold18658	Ribosomal_L11	2.6e-31
	Raw assembly by Boothby et al. (2015)	gi_957786626_gb_LMYF01001554_1_Hypsibius_dujardini_scaffold1724	PGK	2.5e-16
	Raw assembly by Boothby et al. (2015)	gi_957782289_gb_LMYF01005891_1_Hypsibius_dujardini_scaffold6264	Ribosomal_L28	2.5e-17
	Raw assembly by Boothby et al. (2015)	gi_957771996_gb_LMYF01012603_1_Hypsibius_dujardini_scaffold14283	dsrm	1.4e-10
	Raw assembly by Boothby et al. (2015)	gi_957785265_gb_LMYF01002915_1_Hypsibius_dujardini_scaffold3143	GTP1_OBG	6.5e-12
	Raw assembly by Boothby et al. (2015)	gi_957781248_gb_LMYF01006932_1_Hypsibius_dujardini_scaffold7404	Ribosomal_L16	9.4e-54
	Raw assembly by Boothby et al. (2015)	gi_957768435_gb_LMYF01016164_1_Hypsibius_dujardini_scaffold18658	Ribosomal_L10	4.6e-28
	Raw assembly by Boothby et al. (2015)	gi_957786835_gb_LMYF01001345_1_Hypsibius_dujardini_scaffold1508	PseudoU_synth_1	7.8e-29
	Raw assembly by Boothby et al. (2015)	gi_957781548_gb_LMYF01006632_1_Hypsibius_dujardini_scaffold7061	RNA_pol_Rpb2_2	1.5e-13
	Raw assembly by Boothby et al. (2015)	gi_957780139_gb_LMYF01008041_1_Hypsibius_dujardini_scaffold8686	Ribosomal_S8	3.4e-47
	Raw assembly by Boothby et al. (2015)	gi_957781770_gb_LMYF01006410_1_Hypsibius_dujardini_scaffold6823	RNA_pol_Rpb2_3	1.7e-30
	Raw assembly by Boothby et al. (2015)	gi_957785214_gb_LMYF01002966_1_Hypsibius_dujardini_scaffold3199	Peptidase_A8	7.2e-42
	Raw assembly by Boothby et al. (2015)	gi_957781770_gb_LMYF01006410_1_Hypsibius_dujardini_scaffold6823	RNA_pol_Rpb2_2	1.8e-24
	Raw assembly by Boothby et al. (2015)	gi_957787959_gb_LMYF01000221_1_Hypsibius_dujardini_scaffold277	RNA_pol_Rpb1_4	2.1e-16
	Raw assembly by Boothby et al. (2015)	gi_957765668_gb_LMYF01018931_1_Hypsibius_dujardini_scaffold22024	IPPT	3.6e-67
	Raw assembly by Boothby et al. (2015)	gi_957781118_gb_LMYF01007062_1_Hypsibius_dujardini_scaffold7542	dsrm	3.6e-11
	Raw assembly by Boothby et al. (2015)	gi_957782977_gb_LMYF01005203_1_Hypsibius_dujardini_scaffold5540	PGK	2.5e-16
	Raw assembly by Boothby et al. (2015)	gi_957781770_gb_LMYF01006410_1_Hypsibius_dujardini_scaffold6823	RNA_pol_Rpb2_45	4.7e-18
	Raw assembly by Boothby et al. (2015)	gi_957787012_gb_LMYF01001168_1_Hypsibius_dujardini_scaffold1321	Ribosomal_S15	1e-30
	Raw assembly by Boothby et al. (2015)	gi_957773702_gb_LMYF01010897_1_Hypsibius_dujardini_scaffold12191	SecG	5.2e-17
	Raw assembly by Boothby et al. (2015)	gi_957786626_gb_LMYF01001554_1_Hypsibius_dujardini_scaffold1724	PGK	3.4e-26
	Raw assembly by Boothby et al. (2015)	gi_957788100_gb_LMYF01000080_1_Hypsibius_dujardini_scaffold102	S-AdoMet_synt_C	9.6e-72
	Raw assembly by Boothby et al. (2015)	gi_957765471_gb_LMYF01019128_1_Hypsibius_dujardini_scaffold22272	Ribosomal_L3	1.3e-30
	Raw assembly by Boothby et al. (2015)	gi_957773657_gb_LMYF01010942_1_Hypsibius_dujardini_scaffold12246	Ribosomal_L18p	2.7e-39
	Raw assembly by Boothby et al. (2015)	gi_957788178_gb_LMYF01000002_1_Hypsibius_dujardini_scaffold2	Ribosomal_L21p	3.5e-26
	Raw assembly by Boothby et al. (2015)	gi_957768885_gb_LMYF01015714_1_Hypsibius_dujardini_scaffold18084	Ribonuclease_P	8.5e-21
	Raw assembly by Boothby et al. (2015)	gi_957768658_gb_LMYF01015941_1_Hypsibius_dujardini_scaffold18372	Ribosomal_L18e	2.3e-26
	Raw assembly by Boothby et al. (2015)	gi_957784616_gb_LMYF01003564_1_Hypsibius_dujardini_scaffold3828	Ribosomal_S11	4.9e-22
	Raw assembly by Boothby et al. (2015)	gi_957788179_gb_LMYF01000001_1_Hypsibius_dujardini_scaffold1	Ribosomal_L14	2.4e-55
	Raw assembly by Boothby et al. (2015)	gi_957788100_gb_LMYF01000080_1_Hypsibius_dujardini_scaffold102	GidB	2.3e-52
	Raw assembly by Boothby et al. (2015)	gi_957768671_gb_LMYF01015928_1_Hypsibius_dujardini_scaffold18354	RecR	3.2e-20
	Raw assembly by Boothby et al. (2015)	gi_957788179_gb_LMYF01000001_1_Hypsibius_dujardini_scaffold1	Ribosomal_L5_C	8e-42
	Raw assembly by Boothby et al. (2015)	gi_957788079_gb_LMYF01000101_1_Hypsibius_dujardini_scaffold131	Seryl_tRNA_N	9.5e-25
	Raw assembly by Boothby et al. (2015)	gi_957769882_gb_LMYF01014717_1_Hypsibius_dujardini_scaffold16886	Ribosom_S12_S23	2.8e-56
	Raw assembly by Boothby et al. (2015)	gi_957768296_gb_LMYF01016303_1_Hypsibius_dujardini_scaffold18835	RNA_pol_Rpb2_3	5e-32
	Raw assembly by Boothby et al. (2015)	gi_957772724_gb_LMYF01011875_1_Hypsibius_dujardini_scaffold13379	tRNA_m1G_MT	3.5e-23
	Raw assembly by Boothby et al. (2015)	gi_957773932_gb_LMYF01010667_1_Hypsibius_dujardini_scaffold11928	GidB	3e-40
	Raw assembly by Boothby et al. (2015)	gi_957773027_gb_LMYF01011572_1_Hypsibius_dujardini_scaffold13017	Ribosomal_S11	6e-48
	Raw assembly by Boothby et al. (2015)	gi_957779200_gb_LMYF01008980_1_Hypsibius_dujardini_scaffold9840	Ribosomal_L1	5.9e-20
	Raw assembly by Boothby et al. (2015)	gi_957786173_gb_LMYF01002007_1_Hypsibius_dujardini_scaffold2203	Ribosomal_L18e	5.1e-22
	Raw assembly by Boothby et al. (2015)	gi_957774915_gb_LMYF01009684_1_Hypsibius_dujardini_scaffold10710	TRCF	4.7e-26
	Raw assembly by Boothby et al. (2015)	gi_957763571_gb_LMYF01021028_1_Hypsibius_dujardini_scaffold24532	EF_TS	1.8e-28
	Raw assembly by Boothby et al. (2015)	gi_957762236_gb_LMYF01022363_1_Hypsibius_dujardini_scaffold26119	RRF	1.4e-46
	Raw assembly by Boothby et al. (2015)	gi_957763240_gb_LMYF01021359_1_Hypsibius_dujardini_scaffold24922	Competence	8.2e-57
	Raw assembly by Boothby et al. (2015)	gi_957788178_gb_LMYF01000002_1_Hypsibius_dujardini_scaffold2	tRNA-synt_1d	1.7e-52
	Raw assembly by Boothby et al. (2015)	gi_957781803_gb_LMYF01006377_1_Hypsibius_dujardini_scaffold6785	Enolase_C	2.7e-37
	Raw assembly by Boothby et al. (2015)	gi_957788178_gb_LMYF01000002_1_Hypsibius_dujardini_scaffold2	Ribosomal_L32p	4.5e-17
	Raw assembly by Boothby et al. (2015)	gi_957769485_gb_LMYF01015114_1_Hypsibius_dujardini_scaffold17372	RuvA_N	2.9e-16
	Raw assembly by Boothby et al. (2015)	gi_957780683_gb_LMYF01007497_1_Hypsibius_dujardini_scaffold8043	PseudoU_synth_1	1.5e-29
	Raw assembly by Boothby et al. (2015)	gi_957788088_gb_LMYF01000092_1_Hypsibius_dujardini_scaffold117	PGK	2.5e-157
	Raw assembly by Boothby et al. (2015)	gi_957781568_gb_LMYF01006612_1_Hypsibius_dujardini_scaffold7041	Ribosomal_L2_C	1.2e-51
	Raw assembly by Boothby et al. (2015)	gi_957768658_gb_LMYF01015941_1_Hypsibius_dujardini_scaffold18372	Ribosomal_S13	3.2e-38
	Raw assembly by Boothby et al. (2015)	gi_957788178_gb_LMYF01000002_1_Hypsibius_dujardini_scaffold2	Ribosomal_L28	1.7e-31
	Raw assembly by Boothby et al. (2015)	gi_957781548_gb_LMYF01006632_1_Hypsibius_dujardini_scaffold7061	RNA_pol_Rpb2_6	7.6e-24
	Raw assembly by Boothby et al. (2015)	gi_957785232_gb_LMYF01002948_1_Hypsibius_dujardini_scaffold3179	S-AdoMet_synt_C	4.4e-65
	Raw assembly by Boothby et al. (2015)	gi_957772547_gb_LMYF01012052_1_Hypsibius_dujardini_scaffold13589	RNA_pol_Rpb2_1	1.3e-28
	Raw assembly by Boothby et al. (2015)	gi_957788179_gb_LMYF01000001_1_Hypsibius_dujardini_scaffold1	SecE	1.2e-19
	Raw assembly by Boothby et al. (2015)	gi_957772164_gb_LMYF01012435_1_Hypsibius_dujardini_scaffold14072	S-AdoMet_synt_M	4.2e-43
	Raw assembly by Boothby et al. (2015)	gi_957765164_gb_LMYF01019435_1_Hypsibius_dujardini_scaffold22635	PGK	3.5e-150
	Raw assembly by Boothby et al. (2015)	gi_957781548_gb_LMYF01006632_1_Hypsibius_dujardini_scaffold7061	RNA_pol_Rpb2_1	9.2e-23
	Raw assembly by Boothby et al. (2015)	gi_957781248_gb_LMYF01006932_1_Hypsibius_dujardini_scaffold7404	Ribosomal_L2	5.6e-34
	Raw assembly by Boothby et al. (2015)	gi_957788177_gb_LMYF01000003_1_Hypsibius_dujardini_scaffold3	LepA_C	3.9e-51
	Raw assembly by Boothby et al. (2015)	gi_957782178_gb_LMYF01006002_1_Hypsibius_dujardini_scaffold6383	YchF-GTPase_C	9.4e-42
	Raw assembly by Boothby et al. (2015)	gi_957780960_gb_LMYF01007220_1_Hypsibius_dujardini_scaffold7720	THF_DHG_CYH_C	2.2e-43
	Raw assembly by Boothby et al. (2015)	gi_957768296_gb_LMYF01016303_1_Hypsibius_dujardini_scaffold18835	RNA_pol_Rpb1_2	7.8e-55
	Raw assembly by Boothby et al. (2015)	gi_957784484_gb_LMYF01003696_1_Hypsibius_dujardini_scaffold3967	TruB_N	1.2e-56
	Raw assembly by Boothby et al. (2015)	gi_957775186_gb_LMYF01009413_1_Hypsibius_dujardini_scaffold10377	Ribosomal_S9	9.3e-47
	Raw assembly by Boothby et al. (2015)	gi_957783000_gb_LMYF01005180_1_Hypsibius_dujardini_scaffold5517	EF_TS	7.3e-67
	Raw assembly by Boothby et al. (2015)	gi_957781568_gb_LMYF01006612_1_Hypsibius_dujardini_scaffold7041	Ribosomal_S5_C	3.7e-32
	Raw assembly by Boothby et al. (2015)	gi_957775049_gb_LMYF01009550_1_Hypsibius_dujardini_scaffold10545	UBA	1.9e-13
	Raw assembly by Boothby et al. (2015)	gi_957780358_gb_LMYF01007822_1_Hypsibius_dujardini_scaffold8430	tRNA_m1G_MT	3.2e-53
	Raw assembly by Boothby et al. (2015)	gi_957780644_gb_LMYF01007536_1_Hypsibius_dujardini_scaffold8087	Ribosomal_S10	1e-42
	Raw assembly by Boothby et al. (2015)	gi_957788126_gb_LMYF01000054_1_Hypsibius_dujardini_scaffold68	EF_TS	4e-16
	Raw assembly by Boothby et al. (2015)	gi_957780778_gb_LMYF01007402_1_Hypsibius_dujardini_scaffold7932	Ribosomal_L28	1.1e-27
	Raw assembly by Boothby et al. (2015)	gi_957787502_gb_LMYF01000678_1_Hypsibius_dujardini_scaffold797	PGK	4.9e-154
	Raw assembly by Boothby et al. (2015)	gi_957782728_gb_LMYF01005452_1_Hypsibius_dujardini_scaffold5802	RNA_pol_Rpb2_6	7.6e-24
	Raw assembly by Boothby et al. (2015)	gi_957782728_gb_LMYF01005452_1_Hypsibius_dujardini_scaffold5802	RNA_pol_Rpb2_7	2.8e-30
	Raw assembly by Boothby et al. (2015)	gi_957780594_gb_LMYF01007586_1_Hypsibius_dujardini_scaffold8144	RNA_pol_Rpb2_6	1.3e-14
	Raw assembly by Boothby et al. (2015)	gi_957769139_gb_LMYF01015460_1_Hypsibius_dujardini_scaffold17784	B5	3.4e-19
	Raw assembly by Boothby et al. (2015)	gi_957788168_gb_LMYF01000012_1_Hypsibius_dujardini_scaffold14	Ribosomal_L3	2.8e-38
	Raw assembly by Boothby et al. (2015)	gi_957788175_gb_LMYF01000005_1_Hypsibius_dujardini_scaffold5	Enolase_N	2.6e-62
	Raw assembly by Boothby et al. (2015)	gi_957780594_gb_LMYF01007586_1_Hypsibius_dujardini_scaffold8144	RNA_pol_Rpb2_2	2.3e-30
	Raw assembly by Boothby et al. (2015)	gi_957788174_gb_LMYF01000006_1_Hypsibius_dujardini_scaffold6	SecE	9.1e-18
	Raw assembly by Boothby et al. (2015)	gi_957788165_gb_LMYF01000015_1_Hypsibius_dujardini_scaffold17	Ribosomal_L6	1e-44
	Raw assembly by Boothby et al. (2015)	gi_957769015_gb_LMYF01015584_1_Hypsibius_dujardini_scaffold17934	PseudoU_synth_1	1.1e-25
	Raw assembly by Boothby et al. (2015)	gi_957788179_gb_LMYF01000001_1_Hypsibius_dujardini_scaffold1	RNA_pol_L	9.1e-23
	Raw assembly by Boothby et al. (2015)	gi_957764877_gb_LMYF01019722_1_Hypsibius_dujardini_scaffold22970	CTP_synth_N	3.1e-36
	Raw assembly by Boothby et al. (2015)	gi_957788174_gb_LMYF01000006_1_Hypsibius_dujardini_scaffold6	SRP_SPB	6.1e-33
	Raw assembly by Boothby et al. (2015)	gi_957779614_gb_LMYF01008566_1_Hypsibius_dujardini_scaffold9330	FAD_syn	4.2e-49
	Raw assembly by Boothby et al. (2015)	gi_957768296_gb_LMYF01016303_1_Hypsibius_dujardini_scaffold18835	RNA_pol_Rpb2_7	3.6e-33
	Raw assembly by Boothby et al. (2015)	gi_957788052_gb_LMYF01000128_1_Hypsibius_dujardini_scaffold163	CoaE	1.5e-18
	Raw assembly by Boothby et al. (2015)	gi_957788175_gb_LMYF01000005_1_Hypsibius_dujardini_scaffold5	Toprim_N	2.3e-36
	Raw assembly by Boothby et al. (2015)	gi_957788030_gb_LMYF01000150_1_Hypsibius_dujardini_scaffold192	Trigger_C	6.2e-32
	Raw assembly by Boothby et al. (2015)	gi_957768296_gb_LMYF01016303_1_Hypsibius_dujardini_scaffold18835	RNA_pol_Rpb2_45	4.7e-26
	Raw assembly by Boothby et al. (2015)	gi_957774885_gb_LMYF01009714_1_Hypsibius_dujardini_scaffold10749	Oligomerisation	8e-10
	Raw assembly by Boothby et al. (2015)	gi_957788179_gb_LMYF01000001_1_Hypsibius_dujardini_scaffold1	IF-2	6.8e-41
	Raw assembly by Boothby et al. (2015)	gi_957788179_gb_LMYF01000001_1_Hypsibius_dujardini_scaffold1	Ribosomal_S11	7.2e-48
	Raw assembly by Boothby et al. (2015)	gi_957788179_gb_LMYF01000001_1_Hypsibius_dujardini_scaffold1	NusA_N	8.1e-31
	Raw assembly by Boothby et al. (2015)	gi_957788177_gb_LMYF01000003_1_Hypsibius_dujardini_scaffold3	Ribosomal_S15	1.2e-27
	Raw assembly by Boothby et al. (2015)	gi_957788100_gb_LMYF01000080_1_Hypsibius_dujardini_scaffold102	TruB_N	8.5e-61
	Raw assembly by Boothby et al. (2015)	gi_957774221_gb_LMYF01010378_1_Hypsibius_dujardini_scaffold11571	Competence	1.4e-55
	Raw assembly by Boothby et al. (2015)	gi_957788175_gb_LMYF01000005_1_Hypsibius_dujardini_scaffold5	Ribosomal_L27	3.4e-40
	Raw assembly by Boothby et al. (2015)	gi_957788179_gb_LMYF01000001_1_Hypsibius_dujardini_scaffold1	Ribosomal_S9	3e-45
	Raw assembly by Boothby et al. (2015)	gi_957784130_gb_LMYF01004050_1_Hypsibius_dujardini_scaffold4340	NusA_N	8.1e-31
	Raw assembly by Boothby et al. (2015)	gi_957782214_gb_LMYF01005966_1_Hypsibius_dujardini_scaffold6341	MurB_C	1.9e-32
	Raw assembly by Boothby et al. (2015)	gi_957779205_gb_LMYF01008975_1_Hypsibius_dujardini_scaffold9834	GMP_synt_C	1.4e-42
	Raw assembly by Boothby et al. (2015)	gi_957781608_gb_LMYF01006572_1_Hypsibius_dujardini_scaffold6996	Ribosomal_L11_N	5.7e-31
	Raw assembly by Boothby et al. (2015)	gi_957787502_gb_LMYF01000678_1_Hypsibius_dujardini_scaffold797	IF3_N	8.6e-32
	Raw assembly by Boothby et al. (2015)	gi_957781568_gb_LMYF01006612_1_Hypsibius_dujardini_scaffold7041	Ribosomal_L3	5.5e-39
	Raw assembly by Boothby et al. (2015)	gi_957766089_gb_LMYF01018510_1_Hypsibius_dujardini_scaffold21522	Cytidylate_kin	8.6e-54
	Raw assembly by Boothby et al. (2015)	gi_957787502_gb_LMYF01000678_1_Hypsibius_dujardini_scaffold797	Ribosomal_L20	1.4e-42
	Raw assembly by Boothby et al. (2015)	gi_957786638_gb_LMYF01001542_1_Hypsibius_dujardini_scaffold1712	Ribosomal_L5_C	1.5e-17
	Raw assembly by Boothby et al. (2015)	gi_957787279_gb_LMYF01000901_1_Hypsibius_dujardini_scaffold1040	Ribosomal_L2_C	2.5e-35
	Raw assembly by Boothby et al. (2015)	gi_957771916_gb_LMYF01012683_1_Hypsibius_dujardini_scaffold14381	tRNA_m1G_MT	3.9e-37
	Raw assembly by Boothby et al. (2015)	gi_957774183_gb_LMYF01010416_1_Hypsibius_dujardini_scaffold11610	THF_DHG_CYH	7.2e-14
	Raw assembly by Boothby et al. (2015)	gi_957784834_gb_LMYF01003346_1_Hypsibius_dujardini_scaffold3600	GAD	2.2e-19
	Raw assembly by Boothby et al. (2015)	gi_957779044_gb_LMYF01009136_1_Hypsibius_dujardini_scaffold10021	Ribosomal_S9	1.3e-09
	Raw assembly by Boothby et al. (2015)	gi_957783343_gb_LMYF01004837_1_Hypsibius_dujardini_scaffold5157	RNA_pol_A_bac	6.4e-17
	Raw assembly by Boothby et al. (2015)	gi_957784130_gb_LMYF01004050_1_Hypsibius_dujardini_scaffold4340	IF2_N	4.5e-18
	Raw assembly by Boothby et al. (2015)	gi_957785594_gb_LMYF01002586_1_Hypsibius_dujardini_scaffold2796	Ribosomal_L21p	6.8e-42
	Raw assembly by Boothby et al. (2015)	gi_957788155_gb_LMYF01000025_1_Hypsibius_dujardini_scaffold28	SRP_SPB	2.4e-32
	Raw assembly by Boothby et al. (2015)	gi_957788168_gb_LMYF01000012_1_Hypsibius_dujardini_scaffold14	Ribosomal_L29	7.6e-16
	Raw assembly by Boothby et al. (2015)	gi_957788179_gb_LMYF01000001_1_Hypsibius_dujardini_scaffold1	Ribosomal_S4	7.4e-21
	Raw assembly by Boothby et al. (2015)	gi_957781608_gb_LMYF01006572_1_Hypsibius_dujardini_scaffold6996	Ribosomal_L10	1.8e-24
	Raw assembly by Boothby et al. (2015)	gi_957785594_gb_LMYF01002586_1_Hypsibius_dujardini_scaffold2796	GTP1_OBG	1.4e-62
	Raw assembly by Boothby et al. (2015)	gi_957788155_gb_LMYF01000025_1_Hypsibius_dujardini_scaffold28	RimM	2.9e-19
	Raw assembly by Boothby et al. (2015)	gi_957788168_gb_LMYF01000012_1_Hypsibius_dujardini_scaffold14	Ribosomal_S3_C	1.6e-30
	Raw assembly by Boothby et al. (2015)	gi_957768667_gb_LMYF01015932_1_Hypsibius_dujardini_scaffold18358	Ribosomal_L19	2e-09
	Raw assembly by Boothby et al. (2015)	gi_957781927_gb_LMYF01006253_1_Hypsibius_dujardini_scaffold6654	Ribosomal_S4	1.7e-16
	Raw assembly by Boothby et al. (2015)	gi_957781651_gb_LMYF01006529_1_Hypsibius_dujardini_scaffold6948	Ribosomal_S11	4.9e-22
	Raw assembly by Boothby et al. (2015)	gi_957780170_gb_LMYF01008010_1_Hypsibius_dujardini_scaffold8652	Ribosomal_L17	2.5e-31
	Raw assembly by Boothby et al. (2015)	gi_957787658_gb_LMYF01000522_1_Hypsibius_dujardini_scaffold622	RuvA_C	2.8e-12
	Raw assembly by Boothby et al. (2015)	gi_957769517_gb_LMYF01015082_1_Hypsibius_dujardini_scaffold17330	Ribosomal_L10	9.8e-26
	Raw assembly by Boothby et al. (2015)	gi_957774476_gb_LMYF01010123_1_Hypsibius_dujardini_scaffold11258	SecY	3.9e-118
	Raw assembly by Boothby et al. (2015)	gi_957784571_gb_LMYF01003609_1_Hypsibius_dujardini_scaffold3875	RNA_pol_Rpb2_6	1.3e-14
	Raw assembly by Boothby et al. (2015)	gi_957780170_gb_LMYF01008010_1_Hypsibius_dujardini_scaffold8652	SecY	3.8e-40
	Raw assembly by Boothby et al. (2015)	gi_957787873_gb_LMYF01000307_1_Hypsibius_dujardini_scaffold380	UPF0054	7.1e-31
	Raw assembly by Boothby et al. (2015)	gi_957781568_gb_LMYF01006612_1_Hypsibius_dujardini_scaffold7041	Ribosomal_L18e	5.6e-28
	Raw assembly by Boothby et al. (2015)	gi_957774476_gb_LMYF01010123_1_Hypsibius_dujardini_scaffold11258	Ribosomal_S5_C	4.3e-33
	Raw assembly by Boothby et al. (2015)	gi_957774912_gb_LMYF01009687_1_Hypsibius_dujardini_scaffold10713	Ribosomal_L27	6.7e-28
	Raw assembly by Boothby et al. (2015)	gi_957780170_gb_LMYF01008010_1_Hypsibius_dujardini_scaffold8652	Ribosomal_S11	3.4e-48
	Raw assembly by Boothby et al. (2015)	gi_957785753_gb_LMYF01002427_1_Hypsibius_dujardini_scaffold2634	Seryl_tRNA_N	9.4e-17
	Raw assembly by Boothby et al. (2015)	gi_957768567_gb_LMYF01016032_1_Hypsibius_dujardini_scaffold18492	Ribosomal_S15	3.6e-30
	Raw assembly by Boothby et al. (2015)	gi_957773922_gb_LMYF01010677_1_Hypsibius_dujardini_scaffold11939	RNA_pol_Rpb1_5	1e-37
	Raw assembly by Boothby et al. (2015)	gi_957787658_gb_LMYF01000522_1_Hypsibius_dujardini_scaffold622	THF_DHG_CYH	2.5e-42
	Raw assembly by Boothby et al. (2015)	gi_957785634_gb_LMYF01002546_1_Hypsibius_dujardini_scaffold2755	Peptidase_A8	1.3e-36
	Raw assembly by Boothby et al. (2015)	gi_957774183_gb_LMYF01010416_1_Hypsibius_dujardini_scaffold11610	THF_DHG_CYH_C	8e-23
	Raw assembly by Boothby et al. (2015)	gi_957773242_gb_LMYF01011357_1_Hypsibius_dujardini_scaffold12755	Methyltransf_5	2.5e-93
	Raw assembly by Boothby et al. (2015)	gi_957774476_gb_LMYF01010123_1_Hypsibius_dujardini_scaffold11258	Ribosomal_L18p	1.9e-31
	Raw assembly by Boothby et al. (2015)	gi_957764939_gb_LMYF01019660_1_Hypsibius_dujardini_scaffold22900	S-AdoMet_synt_C	1.4e-16
	Raw assembly by Boothby et al. (2015)	gi_957773823_gb_LMYF01010776_1_Hypsibius_dujardini_scaffold12046	Enolase_N	2.6e-62
	Raw assembly by Boothby et al. (2015)	gi_957779021_gb_LMYF01009159_1_Hypsibius_dujardini_scaffold10050	GTP1_OBG	4.3e-52
	Raw assembly by Boothby et al. (2015)	gi_957788089_gb_LMYF01000091_1_Hypsibius_dujardini_scaffold115	Flavokinase	1.2e-44
	Raw assembly by Boothby et al. (2015)	gi_957782327_gb_LMYF01005853_1_Hypsibius_dujardini_scaffold6225	THF_DHG_CYH_C	1.3e-68
	Raw assembly by Boothby et al. (2015)	gi_957784136_gb_LMYF01004044_1_Hypsibius_dujardini_scaffold4334	GidB	4.4e-39
	Raw assembly by Boothby et al. (2015)	gi_957786737_gb_LMYF01001443_1_Hypsibius_dujardini_scaffold1610	Peptidase_A8	3.1e-36
	Raw assembly by Boothby et al. (2015)	gi_957784225_gb_LMYF01003955_1_Hypsibius_dujardini_scaffold4239	GrpE	3.9e-39
	Raw assembly by Boothby et al. (2015)	gi_957779012_gb_LMYF01009168_1_Hypsibius_dujardini_scaffold10061	YchF-GTPase_C	1.9e-40
	Raw assembly by Boothby et al. (2015)	gi_957773922_gb_LMYF01010677_1_Hypsibius_dujardini_scaffold11939	RNA_pol_Rpb1_1	1.1e-19
	Raw assembly by Boothby et al. (2015)	gi_957763803_gb_LMYF01020796_1_Hypsibius_dujardini_scaffold24250	GTP1_OBG	1.7e-62
	Raw assembly by Boothby et al. (2015)	gi_957762871_gb_LMYF01021728_1_Hypsibius_dujardini_scaffold25362	Ribosomal_L18e	1.7e-28
	Raw assembly by Boothby et al. (2015)	gi_957787213_gb_LMYF01000967_1_Hypsibius_dujardini_scaffold1112	Ribosomal_L3	4.1e-23
	Raw assembly by Boothby et al. (2015)	gi_957787959_gb_LMYF01000221_1_Hypsibius_dujardini_scaffold277	RNA_pol_Rpb2_7	3.4e-30
	Raw assembly by Boothby et al. (2015)	gi_957774346_gb_LMYF01010253_1_Hypsibius_dujardini_scaffold11413	Trigger_N	3.4e-37
	Raw assembly by Boothby et al. (2015)	gi_957781608_gb_LMYF01006572_1_Hypsibius_dujardini_scaffold6996	Ribosomal_L11	1.3e-30
	Raw assembly by Boothby et al. (2015)	gi_957787959_gb_LMYF01000221_1_Hypsibius_dujardini_scaffold277	RNA_pol_Rpb2_45	1.3e-23
	Raw assembly by Boothby et al. (2015)	gi_957780745_gb_LMYF01007435_1_Hypsibius_dujardini_scaffold7968	RNA_pol_Rpb2_3	9.4e-20
	Raw assembly by Boothby et al. (2015)	gi_957771012_gb_LMYF01013587_1_Hypsibius_dujardini_scaffold15504	Toprim_N	7.6e-40
	Raw assembly by Boothby et al. (2015)	gi_957768696_gb_LMYF01015903_1_Hypsibius_dujardini_scaffold18324	SecY	3.1e-46
	Raw assembly by Boothby et al. (2015)	gi_957781248_gb_LMYF01006932_1_Hypsibius_dujardini_scaffold7404	Ribosomal_L3	1.2e-40
	Raw assembly by Boothby et al. (2015)	gi_957768696_gb_LMYF01015903_1_Hypsibius_dujardini_scaffold18324	Ribosomal_S5_C	5.7e-30
	Raw assembly by Boothby et al. (2015)	gi_957787959_gb_LMYF01000221_1_Hypsibius_dujardini_scaffold277	Ribosomal_L1	1.6e-51
	Raw assembly by Boothby et al. (2015)	gi_957783939_gb_LMYF01004241_1_Hypsibius_dujardini_scaffold4539	RNA_pol_Rpb1_3	3.7e-23
	Raw assembly by Boothby et al. (2015)	gi_957788173_gb_LMYF01000007_1_Hypsibius_dujardini_scaffold7	Methyltransf_5	2.8e-99
	Raw assembly by Boothby et al. (2015)	gi_957783956_gb_LMYF01004224_1_Hypsibius_dujardini_scaffold4521	IF-2	5.6e-34
	Raw assembly by Boothby et al. (2015)	gi_957783000_gb_LMYF01005180_1_Hypsibius_dujardini_scaffold5517	Ribosomal_S2	3.1e-77
	Raw assembly by Boothby et al. (2015)	gi_957788179_gb_LMYF01000001_1_Hypsibius_dujardini_scaffold1	Ribosomal_L2_C	1.6e-53
	Raw assembly by Boothby et al. (2015)	gi_957787225_gb_LMYF01000955_1_Hypsibius_dujardini_scaffold1099	Ribosomal_L1	1.3e-45
	Raw assembly by Boothby et al. (2015)	gi_957778995_gb_LMYF01009185_1_Hypsibius_dujardini_scaffold10085	Ribosomal_L5	1.7e-20
	Raw assembly by Boothby et al. (2015)	gi_957767522_gb_LMYF01017077_1_Hypsibius_dujardini_scaffold19777	RRF	1.5e-55
	Raw assembly by Boothby et al. (2015)	gi_957788179_gb_LMYF01000001_1_Hypsibius_dujardini_scaffold1	Ribosomal_S17	3.9e-32
	Raw assembly by Boothby et al. (2015)	gi_957787959_gb_LMYF01000221_1_Hypsibius_dujardini_scaffold277	RNA_pol_Rpb2_6	1.3e-152
	Raw assembly by Boothby et al. (2015)	gi_957785505_gb_LMYF01002675_1_Hypsibius_dujardini_scaffold2891	THF_DHG_CYH	5.8e-40
	Raw assembly by Boothby et al. (2015)	gi_957780383_gb_LMYF01007797_1_Hypsibius_dujardini_scaffold8400	MurB_C	6.9e-30
	Raw assembly by Boothby et al. (2015)	gi_957767556_gb_LMYF01017043_1_Hypsibius_dujardini_scaffold19738	IF3_C	7.4e-26
	Raw assembly by Boothby et al. (2015)	gi_957788179_gb_LMYF01000001_1_Hypsibius_dujardini_scaffold1	Ribosomal_L16	1.8e-53
	Raw assembly by Boothby et al. (2015)	gi_957783956_gb_LMYF01004224_1_Hypsibius_dujardini_scaffold4521	RBFA	2.4e-30
	Raw assembly by Boothby et al. (2015)	gi_957778995_gb_LMYF01009185_1_Hypsibius_dujardini_scaffold10085	Ribosomal_L16	1.5e-52
	Raw assembly by Boothby et al. (2015)	gi_957785546_gb_LMYF01002634_1_Hypsibius_dujardini_scaffold2847	Ribosomal_L16	3e-10
	Raw assembly by Boothby et al. (2015)	gi_957780633_gb_LMYF01007547_1_Hypsibius_dujardini_scaffold8099	GrpE	1.2e-48
	Raw assembly by Boothby et al. (2015)	gi_957781494_gb_LMYF01006686_1_Hypsibius_dujardini_scaffold7120	UPF0081	1.1e-33
	Raw assembly by Boothby et al. (2015)	gi_957788122_gb_LMYF01000058_1_Hypsibius_dujardini_scaffold74	Flavokinase	9.2e-12
	Raw assembly by Boothby et al. (2015)	gi_957785851_gb_LMYF01002329_1_Hypsibius_dujardini_scaffold2534	dsrm	3.9e-13
	Raw assembly by Boothby et al. (2015)	gi_957787476_gb_LMYF01000704_1_Hypsibius_dujardini_scaffold824	Ribosom_S12_S23	7.6e-36
	Raw assembly by Boothby et al. (2015)	gi_957766568_gb_LMYF01018031_1_Hypsibius_dujardini_scaffold20926	GAD	1.8e-13
	Raw assembly by Boothby et al. (2015)	gi_957780745_gb_LMYF01007435_1_Hypsibius_dujardini_scaffold7968	RNA_pol_Rpb2_6	2.8e-11
	Raw assembly by Boothby et al. (2015)	gi_957775312_gb_LMYF01009287_1_Hypsibius_dujardini_scaffold10210	UBA	2.2e-10
	Raw assembly by Boothby et al. (2015)	gi_957773270_gb_LMYF01011329_1_Hypsibius_dujardini_scaffold12720	Ribosomal_S5_C	5.8e-10
	Raw assembly by Boothby et al. (2015)	gi_957780474_gb_LMYF01007706_1_Hypsibius_dujardini_scaffold8292	RNA_pol_Rpb2_6	2.8e-68
	Raw assembly by Boothby et al. (2015)	gi_957788169_gb_LMYF01000011_1_Hypsibius_dujardini_scaffold11	RRF	1.7e-66
	Raw assembly by Boothby et al. (2015)	gi_957770927_gb_LMYF01013672_1_Hypsibius_dujardini_scaffold15607	IF3_N	7.6e-33
	Raw assembly by Boothby et al. (2015)	gi_957774969_gb_LMYF01009630_1_Hypsibius_dujardini_scaffold10647	THF_DHG_CYH	1.3e-37
	Raw assembly by Boothby et al. (2015)	gi_957788170_gb_LMYF01000010_1_Hypsibius_dujardini_scaffold10	DNA_pol3_beta_3	5.8e-26
	Raw assembly by Boothby et al. (2015)	gi_957788169_gb_LMYF01000011_1_Hypsibius_dujardini_scaffold11	THF_DHG_CYH	1.2e-40
	Raw assembly by Boothby et al. (2015)	gi_957788174_gb_LMYF01000006_1_Hypsibius_dujardini_scaffold6	TRCF	6.7e-24
	Raw assembly by Boothby et al. (2015)	gi_957780454_gb_LMYF01007726_1_Hypsibius_dujardini_scaffold8316	THF_DHG_CYH_C	2.7e-67
	Raw assembly by Boothby et al. (2015)	gi_957788170_gb_LMYF01000010_1_Hypsibius_dujardini_scaffold10	DNA_pol3_beta_2	1.3e-33
	Raw assembly by Boothby et al. (2015)	gi_957781248_gb_LMYF01006932_1_Hypsibius_dujardini_scaffold7404	Ribosomal_S10	2.7e-41
	Raw assembly by Boothby et al. (2015)	gi_957766737_gb_LMYF01017862_1_Hypsibius_dujardini_scaffold20720	PseudoU_synth_1	6e-27
	Raw assembly by Boothby et al. (2015)	gi_957781248_gb_LMYF01006932_1_Hypsibius_dujardini_scaffold7404	Ribosomal_L4	4.5e-65
	Raw assembly by Boothby et al. (2015)	gi_957774260_gb_LMYF01010339_1_Hypsibius_dujardini_scaffold11527	Phe_tRNA-synt_N	4.1e-17
	Raw assembly by Boothby et al. (2015)	gi_957780174_gb_LMYF01008006_1_Hypsibius_dujardini_scaffold8648	CoaE	2.9e-52
	Raw assembly by Boothby et al. (2015)	gi_957788173_gb_LMYF01000007_1_Hypsibius_dujardini_scaffold7	RuvA_N	6.3e-18
	Raw assembly by Boothby et al. (2015)	gi_957787501_gb_LMYF01000679_1_Hypsibius_dujardini_scaffold798	GrpE	8.6e-47
	Raw assembly by Boothby et al. (2015)	gi_957786844_gb_LMYF01001336_1_Hypsibius_dujardini_scaffold1499	RNA_pol_Rpb1_2	3.6e-52
	Raw assembly by Boothby et al. (2015)	gi_957788174_gb_LMYF01000006_1_Hypsibius_dujardini_scaffold6	IF3_N	5.9e-21
	Raw assembly by Boothby et al. (2015)	gi_957787755_gb_LMYF01000425_1_Hypsibius_dujardini_scaffold517	Ribonuclease_P	3.1e-27
	Raw assembly by Boothby et al. (2015)	gi_957782452_gb_LMYF01005728_1_Hypsibius_dujardini_scaffold6094	RNA_pol_Rpb1_3	5.2e-21
	Raw assembly by Boothby et al. (2015)	gi_957783887_gb_LMYF01004293_1_Hypsibius_dujardini_scaffold4592	MurB_C	1.2e-30
	Raw assembly by Boothby et al. (2015)	gi_957781979_gb_LMYF01006201_1_Hypsibius_dujardini_scaffold6600	FAD_syn	9.6e-47
	Raw assembly by Boothby et al. (2015)	gi_957785110_gb_LMYF01003070_1_Hypsibius_dujardini_scaffold3309	IF3_C	6.2e-10
	Raw assembly by Boothby et al. (2015)	gi_957780474_gb_LMYF01007706_1_Hypsibius_dujardini_scaffold8292	RNA_pol_Rpb2_7	2.8e-30
	Raw assembly by Boothby et al. (2015)	gi_957763655_gb_LMYF01020944_1_Hypsibius_dujardini_scaffold24421	TRCF	4.1e-28
	Raw assembly by Boothby et al. (2015)	gi_957772846_gb_LMYF01011753_1_Hypsibius_dujardini_scaffold13231	THF_DHG_CYH_C	6.5e-66
	Raw assembly by Boothby et al. (2015)	gi_957780474_gb_LMYF01007706_1_Hypsibius_dujardini_scaffold8292	RNA_pol_Rpb2_6	2.4e-11
	Raw assembly by Boothby et al. (2015)	gi_957778995_gb_LMYF01009185_1_Hypsibius_dujardini_scaffold10085	Ribosomal_L29	1.3e-20
	Raw assembly by Boothby et al. (2015)	gi_957781568_gb_LMYF01006612_1_Hypsibius_dujardini_scaffold7041	Ribosomal_L16	7.1e-54
	Raw assembly by Boothby et al. (2015)	gi_957783001_gb_LMYF01005179_1_Hypsibius_dujardini_scaffold5516	Ribosomal_L10	2.2e-17
	Raw assembly by Boothby et al. (2015)	gi_957773657_gb_LMYF01010942_1_Hypsibius_dujardini_scaffold12246	Ribosomal_L4	2.5e-32
	Raw assembly by Boothby et al. (2015)	gi_957778995_gb_LMYF01009185_1_Hypsibius_dujardini_scaffold10085	Ribosomal_L14	1.5e-52
	Raw assembly by Boothby et al. (2015)	gi_957781568_gb_LMYF01006612_1_Hypsibius_dujardini_scaffold7041	Ribosomal_L22	7.5e-27
	Raw assembly by Boothby et al. (2015)	gi_957788168_gb_LMYF01000012_1_Hypsibius_dujardini_scaffold14	Ribosomal_L23	2.1e-26
	Raw assembly by Boothby et al. (2015)	gi_957780745_gb_LMYF01007435_1_Hypsibius_dujardini_scaffold7968	RNA_pol_Rpb2_6	7.2e-68
	Raw assembly by Boothby et al. (2015)	gi_957788174_gb_LMYF01000006_1_Hypsibius_dujardini_scaffold6	RNA_pol_Rpb2_6	5.8e-145
	Raw assembly by Boothby et al. (2015)	gi_957773381_gb_LMYF01011218_1_Hypsibius_dujardini_scaffold12589	RBFA	8.2e-35
	Raw assembly by Boothby et al. (2015)	gi_957773657_gb_LMYF01010942_1_Hypsibius_dujardini_scaffold12246	Ribosomal_L2_C	1.2e-52
	Raw assembly by Boothby et al. (2015)	gi_957779692_gb_LMYF01008488_1_Hypsibius_dujardini_scaffold9239	Ribosomal_S15	5.8e-33
	Raw assembly by Boothby et al. (2015)	gi_957765448_gb_LMYF01019151_1_Hypsibius_dujardini_scaffold22307	GAD	1.2e-19
	Raw assembly by Boothby et al. (2015)	gi_957773657_gb_LMYF01010942_1_Hypsibius_dujardini_scaffold12246	Ribosomal_S19	8.1e-38
	Raw assembly by Boothby et al. (2015)	gi_957778995_gb_LMYF01009185_1_Hypsibius_dujardini_scaffold10085	Ribosomal_S3_C	1.2e-31
	Raw assembly by Boothby et al. (2015)	gi_957781254_gb_LMYF01006926_1_Hypsibius_dujardini_scaffold7394	UPF0081	2.3e-37
	Raw assembly by Boothby et al. (2015)	gi_957788168_gb_LMYF01000012_1_Hypsibius_dujardini_scaffold14	Ribosomal_L22	1.7e-30
	Raw assembly by Boothby et al. (2015)	gi_957772936_gb_LMYF01011663_1_Hypsibius_dujardini_scaffold13131	Ribosomal_S16	2.7e-27
	Raw assembly by Boothby et al. (2015)	gi_957764936_gb_LMYF01019663_1_Hypsibius_dujardini_scaffold22903	DNA_pol3_beta	1.3e-43
	Raw assembly by Boothby et al. (2015)	gi_957782452_gb_LMYF01005728_1_Hypsibius_dujardini_scaffold6094	RNA_pol_Rpb1_2	8.9e-52
	Raw assembly by Boothby et al. (2015)	gi_957786822_gb_LMYF01001358_1_Hypsibius_dujardini_scaffold1521	RNA_pol_Rpb1_3	2.3e-19
	Raw assembly by Boothby et al. (2015)	gi_957780170_gb_LMYF01008010_1_Hypsibius_dujardini_scaffold8652	RNA_pol_L	1.9e-25
	Raw assembly by Boothby et al. (2015)	gi_957769751_gb_LMYF01014848_1_Hypsibius_dujardini_scaffold17047	UvrC_HhH_N	9.8e-46
	Raw assembly by Boothby et al. (2015)	gi_957788121_gb_LMYF01000059_1_Hypsibius_dujardini_scaffold75	THF_DHG_CYH_C	1.9e-70
	Raw assembly by Boothby et al. (2015)	gi_957780959_gb_LMYF01007221_1_Hypsibius_dujardini_scaffold7721	IPPT	7.1e-70
	Raw assembly by Boothby et al. (2015)	gi_957781979_gb_LMYF01006201_1_Hypsibius_dujardini_scaffold6600	TruB_N	3.2e-55
	Raw assembly by Boothby et al. (2015)	gi_957785463_gb_LMYF01002717_1_Hypsibius_dujardini_scaffold2935	Ribosomal_L10	1.1e-18
	Raw assembly by Boothby et al. (2015)	gi_957772648_gb_LMYF01011951_1_Hypsibius_dujardini_scaffold13473	Trigger_C	6.3e-34
	Raw assembly by Boothby et al. (2015)	gi_957781770_gb_LMYF01006410_1_Hypsibius_dujardini_scaffold6823	RNA_pol_Rpb1_1	2.5e-98
	Raw assembly by Boothby et al. (2015)	gi_957770558_gb_LMYF01014041_1_Hypsibius_dujardini_scaffold16057	RNA_pol_A_CTD	1.4e-23
	Raw assembly by Boothby et al. (2015)	gi_957770608_gb_LMYF01013991_1_Hypsibius_dujardini_scaffold15994	dsrm	4.4e-10
	Raw assembly by Boothby et al. (2015)	gi_957770927_gb_LMYF01013672_1_Hypsibius_dujardini_scaffold15607	IF3_C	4.5e-32
	Raw assembly by Boothby et al. (2015)	gi_957780132_gb_LMYF01008048_1_Hypsibius_dujardini_scaffold8693	RNA_pol_Rpb1_1	8.5e-92
	Raw assembly by Boothby et al. (2015)	gi_957780132_gb_LMYF01008048_1_Hypsibius_dujardini_scaffold8693	Ribosomal_L1	9.2e-50
	Raw assembly by Boothby et al. (2015)	gi_957780474_gb_LMYF01007706_1_Hypsibius_dujardini_scaffold8292	RNA_pol_Rpb2_1	9.2e-23
	Raw assembly by Boothby et al. (2015)	gi_957787346_gb_LMYF01000834_1_Hypsibius_dujardini_scaffold971	S-AdoMet_synt_M	1e-25
	Raw assembly by Boothby et al. (2015)	gi_957779649_gb_LMYF01008531_1_Hypsibius_dujardini_scaffold9290	B5	2.3e-15
	Raw assembly by Boothby et al. (2015)	gi_957780132_gb_LMYF01008048_1_Hypsibius_dujardini_scaffold8693	Ribosomal_L11_N	2.2e-32
	Raw assembly by Boothby et al. (2015)	gi_957780139_gb_LMYF01008041_1_Hypsibius_dujardini_scaffold8686	Ribosomal_L14	8.4e-52
	Raw assembly by Boothby et al. (2015)	gi_957773381_gb_LMYF01011218_1_Hypsibius_dujardini_scaffold12589	Flavokinase	5.3e-37
	Raw assembly by Boothby et al. (2015)	gi_957779430_gb_LMYF01008750_1_Hypsibius_dujardini_scaffold9555	dsrm	2.9e-12
	Raw assembly by Boothby et al. (2015)	gi_957773752_gb_LMYF01010847_1_Hypsibius_dujardini_scaffold12132	NusA_N	1.6e-30
	Raw assembly by Boothby et al. (2015)	gi_957773381_gb_LMYF01011218_1_Hypsibius_dujardini_scaffold12589	FAD_syn	7.3e-49
	Raw assembly by Boothby et al. (2015)	gi_957782452_gb_LMYF01005728_1_Hypsibius_dujardini_scaffold6094	RNA_pol_Rpb1_4	6.1e-41
	Raw assembly by Boothby et al. (2015)	gi_957770448_gb_LMYF01014151_1_Hypsibius_dujardini_scaffold16192	DNA_pol3_beta	2e-33
	Raw assembly by Boothby et al. (2015)	gi_957784651_gb_LMYF01003529_1_Hypsibius_dujardini_scaffold3792	IF3_N	1.7e-32
	Raw assembly by Boothby et al. (2015)	gi_957762411_gb_LMYF01022188_1_Hypsibius_dujardini_scaffold25915	Seryl_tRNA_N	4.6e-13
	Raw assembly by Boothby et al. (2015)	gi_957784572_gb_LMYF01003608_1_Hypsibius_dujardini_scaffold3874	GTP1_OBG	6.1e-54
	Raw assembly by Boothby et al. (2015)	gi_957770448_gb_LMYF01014151_1_Hypsibius_dujardini_scaffold16192	DNA_pol3_beta_3	8.6e-28
	Raw assembly by Boothby et al. (2015)	gi_957781635_gb_LMYF01006545_1_Hypsibius_dujardini_scaffold6966	TRCF	7.1e-25
	Raw assembly by Boothby et al. (2015)	gi_957782452_gb_LMYF01005728_1_Hypsibius_dujardini_scaffold6094	RNA_pol_Rpb1_5	7.7e-36
	Raw assembly by Boothby et al. (2015)	gi_957771956_gb_LMYF01012643_1_Hypsibius_dujardini_scaffold14329	Ribosomal_L21p	5.1e-34
	Raw assembly by Boothby et al. (2015)	gi_957780159_gb_LMYF01008021_1_Hypsibius_dujardini_scaffold8663	RNA_pol_Rpb1_1	7.7e-92
	Raw assembly by Boothby et al. (2015)	gi_957768760_gb_LMYF01015839_1_Hypsibius_dujardini_scaffold18242	Peptidase_A8	2.6e-31
	Raw assembly by Boothby et al. (2015)	gi_957781679_gb_LMYF01006501_1_Hypsibius_dujardini_scaffold6919	Ribosom_S12_S23	4.6e-17
	Raw assembly by Boothby et al. (2015)	gi_957779803_gb_LMYF01008377_1_Hypsibius_dujardini_scaffold9099	RNA_pol_Rpb2_6	1e-24
	Raw assembly by Boothby et al. (2015)	gi_957782243_gb_LMYF01005937_1_Hypsibius_dujardini_scaffold6311	Toprim_N	8e-38
	Raw assembly by Boothby et al. (2015)	gi_957779803_gb_LMYF01008377_1_Hypsibius_dujardini_scaffold9099	RNA_pol_Rpb2_3	5.9e-25
	Raw assembly by Boothby et al. (2015)	gi_957771175_gb_LMYF01013424_1_Hypsibius_dujardini_scaffold15301	tRNA_m1G_MT	6e-54
	Raw assembly by Boothby et al. (2015)	gi_957781774_gb_LMYF01006406_1_Hypsibius_dujardini_scaffold6818	SecE	2.8e-23
	Raw assembly by Boothby et al. (2015)	gi_957770558_gb_LMYF01014041_1_Hypsibius_dujardini_scaffold16057	RNA_pol_A_bac	8.7e-23
	Raw assembly by Boothby et al. (2015)	gi_957773657_gb_LMYF01010942_1_Hypsibius_dujardini_scaffold12246	Ribosomal_L22	2.3e-35
	Raw assembly by Boothby et al. (2015)	gi_957784606_gb_LMYF01003574_1_Hypsibius_dujardini_scaffold3839	THF_DHG_CYH_C	6.9e-16
	Raw assembly by Boothby et al. (2015)	gi_957781774_gb_LMYF01006406_1_Hypsibius_dujardini_scaffold6818	Ribosomal_L11_N	8e-34
	Raw assembly by Boothby et al. (2015)	gi_957773657_gb_LMYF01010942_1_Hypsibius_dujardini_scaffold12246	Ribosomal_L16	2.1e-57
	Raw assembly by Boothby et al. (2015)	gi_957784571_gb_LMYF01003609_1_Hypsibius_dujardini_scaffold3875	RNA_pol_Rpb2_1	1.4e-28
	Raw assembly by Boothby et al. (2015)	gi_957788179_gb_LMYF01000001_1_Hypsibius_dujardini_scaffold1	Ribosomal_L4	4.5e-60
	Raw assembly by Boothby et al. (2015)	gi_957781979_gb_LMYF01006201_1_Hypsibius_dujardini_scaffold6600	IF-2	3.5e-30
	Raw assembly by Boothby et al. (2015)	gi_957780159_gb_LMYF01008021_1_Hypsibius_dujardini_scaffold8663	RNA_pol_Rpb1_4	5.1e-18
	Raw assembly by Boothby et al. (2015)	gi_957763789_gb_LMYF01020810_1_Hypsibius_dujardini_scaffold24268	Ribosomal_S15	1.5e-28
	Raw assembly by Boothby et al. (2015)	gi_957773657_gb_LMYF01010942_1_Hypsibius_dujardini_scaffold12246	Ribosomal_S17	2.5e-31
	Raw assembly by Boothby et al. (2015)	gi_957780159_gb_LMYF01008021_1_Hypsibius_dujardini_scaffold8663	RNA_pol_Rpb1_2	2.5e-53
	Raw assembly by Boothby et al. (2015)	gi_957781642_gb_LMYF01006538_1_Hypsibius_dujardini_scaffold6959	TruB_N	8.3e-45
	Raw assembly by Boothby et al. (2015)	gi_957764333_gb_LMYF01020266_1_Hypsibius_dujardini_scaffold23620	CoaE	1.8e-44
	Raw assembly by Boothby et al. (2015)	gi_957788179_gb_LMYF01000001_1_Hypsibius_dujardini_scaffold1	Ribosomal_S19	1.3e-35
	Raw assembly by Boothby et al. (2015)	gi_957788179_gb_LMYF01000001_1_Hypsibius_dujardini_scaffold1	Ribosomal_L10	2.1e-24
	Raw assembly by Boothby et al. (2015)	gi_957788174_gb_LMYF01000006_1_Hypsibius_dujardini_scaffold6	DNA_pol3_beta_3	4e-24
	Raw assembly by Boothby et al. (2015)	gi_957786822_gb_LMYF01001358_1_Hypsibius_dujardini_scaffold1521	RNA_pol_Rpb2_45	7.5e-16
	Raw assembly by Boothby et al. (2015)	gi_957788177_gb_LMYF01000003_1_Hypsibius_dujardini_scaffold3	Ribosomal_S13	7e-39
	Raw assembly by Boothby et al. (2015)	gi_957783001_gb_LMYF01005179_1_Hypsibius_dujardini_scaffold5516	Ribosomal_L11_N	1.3e-24
	Raw assembly by Boothby et al. (2015)	gi_957788174_gb_LMYF01000006_1_Hypsibius_dujardini_scaffold6	DNA_pol3_beta_2	2.2e-26
	Raw assembly by Boothby et al. (2015)	gi_957779337_gb_LMYF01008843_1_Hypsibius_dujardini_scaffold9676	Cytidylate_kin	4.2e-48
	Raw assembly by Boothby et al. (2015)	gi_957779692_gb_LMYF01008488_1_Hypsibius_dujardini_scaffold9239	IF2_N	2.9e-12
	Raw assembly by Boothby et al. (2015)	gi_957788177_gb_LMYF01000003_1_Hypsibius_dujardini_scaffold3	PseudoU_synth_1	3.3e-29
	Raw assembly by Boothby et al. (2015)	gi_957788175_gb_LMYF01000005_1_Hypsibius_dujardini_scaffold5	Pept_tRNA_hydro	1.1e-62
	Raw assembly by Boothby et al. (2015)	gi_957786822_gb_LMYF01001358_1_Hypsibius_dujardini_scaffold1521	RNA_pol_Rpb2_7	3.2e-30
	Raw assembly by Boothby et al. (2015)	gi_957788177_gb_LMYF01000003_1_Hypsibius_dujardini_scaffold3	RNA_pol_L	2.2e-21
	Raw assembly by Boothby et al. (2015)	gi_957788175_gb_LMYF01000005_1_Hypsibius_dujardini_scaffold5	NusA_N	4.2e-33
	Raw assembly by Boothby et al. (2015)	gi_957788179_gb_LMYF01000001_1_Hypsibius_dujardini_scaffold1	Ribosomal_S2	2.2e-78
	Raw assembly by Boothby et al. (2015)	gi_957787716_gb_LMYF01000464_1_Hypsibius_dujardini_scaffold558	GidB	8.6e-38
	Raw assembly by Boothby et al. (2015)	gi_957788173_gb_LMYF01000007_1_Hypsibius_dujardini_scaffold7	Ribosom_S12_S23	2.5e-59
	Raw assembly by Boothby et al. (2015)	gi_957772014_gb_LMYF01012585_1_Hypsibius_dujardini_scaffold14260	Competence	4e-53
	Raw assembly by Boothby et al. (2015)	gi_957787593_gb_LMYF01000587_1_Hypsibius_dujardini_scaffold697	Cytidylate_kin	5.2e-46
	Raw assembly by Boothby et al. (2015)	gi_957788173_gb_LMYF01000007_1_Hypsibius_dujardini_scaffold7	GAD	3.8e-17
	Raw assembly by Boothby et al. (2015)	gi_957787174_gb_LMYF01001006_1_Hypsibius_dujardini_scaffold1152	RNA_pol_Rpb2_7	3e-20
	Raw assembly by Boothby et al. (2015)	gi_957770882_gb_LMYF01013717_1_Hypsibius_dujardini_scaffold15660	Ribonuclease_P	2.9e-19
	Raw assembly by Boothby et al. (2015)	gi_957786822_gb_LMYF01001358_1_Hypsibius_dujardini_scaffold1521	RNA_pol_Rpb2_2	9.9e-21
	Raw assembly by Boothby et al. (2015)	gi_957787174_gb_LMYF01001006_1_Hypsibius_dujardini_scaffold1152	RNA_pol_Rpb2_3	8.5e-23
	Raw assembly by Boothby et al. (2015)	gi_957788179_gb_LMYF01000001_1_Hypsibius_dujardini_scaffold1	RNA_pol_Rpb2_7	4.2e-30
	Raw assembly by Boothby et al. (2015)	gi_957788179_gb_LMYF01000001_1_Hypsibius_dujardini_scaffold1	RNA_pol_Rpb2_1	1.4e-21
	Raw assembly by Boothby et al. (2015)	gi_957779635_gb_LMYF01008545_1_Hypsibius_dujardini_scaffold9308	tRNA-synt_1d	1.2e-31
	Raw assembly by Boothby et al. (2015)	gi_957788169_gb_LMYF01000011_1_Hypsibius_dujardini_scaffold11	dsrm	7.2e-11
	Raw assembly by Boothby et al. (2015)	gi_957788179_gb_LMYF01000001_1_Hypsibius_dujardini_scaffold1	UPF0079	2.7e-32
	Raw assembly by Boothby et al. (2015)	gi_957766107_gb_LMYF01018492_1_Hypsibius_dujardini_scaffold21498	RBFA	5.2e-31
	Raw assembly by Boothby et al. (2015)	gi_957788179_gb_LMYF01000001_1_Hypsibius_dujardini_scaffold1	RNA_pol_Rpb2_3	1.8e-30
	Raw assembly by Boothby et al. (2015)	gi_957788168_gb_LMYF01000012_1_Hypsibius_dujardini_scaffold14	Ribosomal_S10	5.8e-41
	Raw assembly by Boothby et al. (2015)	gi_957786154_gb_LMYF01002026_1_Hypsibius_dujardini_scaffold2222	Trigger_C	8.1e-33
	Raw assembly by Boothby et al. (2015)	gi_957788179_gb_LMYF01000001_1_Hypsibius_dujardini_scaffold1	RNA_pol_Rpb2_45	5.4e-23
	Raw assembly by Boothby et al. (2015)	gi_957788174_gb_LMYF01000006_1_Hypsibius_dujardini_scaffold6	tRNA-synt_1d	4.2e-46
	Raw assembly by Boothby et al. (2015)	gi_957783106_gb_LMYF01005074_1_Hypsibius_dujardini_scaffold5406	Ribosomal_L4	2.4e-09
	Raw assembly by Boothby et al. (2015)	gi_957769881_gb_LMYF01014718_1_Hypsibius_dujardini_scaffold16887	Enolase_N	2.1e-21
	Raw assembly by Boothby et al. (2015)	gi_957784701_gb_LMYF01003479_1_Hypsibius_dujardini_scaffold3739	RecA	6.6e-168
	Raw assembly by Boothby et al. (2015)	gi_957783607_gb_LMYF01004573_1_Hypsibius_dujardini_scaffold4884	Ribosomal_L13	3.4e-42
	Raw assembly by Boothby et al. (2015)	gi_957788179_gb_LMYF01000001_1_Hypsibius_dujardini_scaffold1	RecR	2.9e-14
	Raw assembly by Boothby et al. (2015)	gi_957779587_gb_LMYF01008593_1_Hypsibius_dujardini_scaffold9361	EF_TS	8e-67
	Raw assembly by Boothby et al. (2015)	gi_957787033_gb_LMYF01001147_1_Hypsibius_dujardini_scaffold1299	Toprim_N	1.4e-29
	Raw assembly by Boothby et al. (2015)	gi_957788179_gb_LMYF01000001_1_Hypsibius_dujardini_scaffold1	RimM	9.3e-13
	Raw assembly by Boothby et al. (2015)	gi_957786154_gb_LMYF01002026_1_Hypsibius_dujardini_scaffold2222	zf-C4_ClpX	6.5e-24
	Raw assembly by Boothby et al. (2015)	gi_957788175_gb_LMYF01000005_1_Hypsibius_dujardini_scaffold5	Ribosomal_L12	1.8e-32
	Raw assembly by Boothby et al. (2015)	gi_957779769_gb_LMYF01008411_1_Hypsibius_dujardini_scaffold9146	UPF0079	7.7e-34
	Raw assembly by Boothby et al. (2015)	gi_957788175_gb_LMYF01000005_1_Hypsibius_dujardini_scaffold5	Ribosomal_L9_C	1.9e-25
	Raw assembly by Boothby et al. (2015)	gi_957788173_gb_LMYF01000007_1_Hypsibius_dujardini_scaffold7	UBA	4e-13
	Raw assembly by Boothby et al. (2015)	gi_957780132_gb_LMYF01008048_1_Hypsibius_dujardini_scaffold8693	Ribosomal_L12	5.2e-31
	Raw assembly by Boothby et al. (2015)	gi_957786752_gb_LMYF01001428_1_Hypsibius_dujardini_scaffold1595	Ribosomal_L19	2.8e-43
	Raw assembly by Boothby et al. (2015)	gi_957766313_gb_LMYF01018286_1_Hypsibius_dujardini_scaffold21244	Cytidylate_kin	3.6e-47
	Raw assembly by Boothby et al. (2015)	gi_957762614_gb_LMYF01021985_1_Hypsibius_dujardini_scaffold25675	Peptidase_A8	1.6e-31
	Raw assembly by Boothby et al. (2015)	gi_957788179_gb_LMYF01000001_1_Hypsibius_dujardini_scaffold1	RNA_pol_Rpb2_6	3.1e-155
	Raw assembly by Boothby et al. (2015)	gi_957781568_gb_LMYF01006612_1_Hypsibius_dujardini_scaffold7041	Ribosomal_L14	6.4e-54
	Raw assembly by Boothby et al. (2015)	gi_957788168_gb_LMYF01000012_1_Hypsibius_dujardini_scaffold14	Ribosomal_S5	7.8e-31
	Raw assembly by Boothby et al. (2015)	gi_957785001_gb_LMYF01003179_1_Hypsibius_dujardini_scaffold3421	MurB_C	7.7e-29
	Raw assembly by Boothby et al. (2015)	gi_957786822_gb_LMYF01001358_1_Hypsibius_dujardini_scaffold1521	RNA_pol_Rpb1_1	2.1e-94
	Raw assembly by Boothby et al. (2015)	gi_957774716_gb_LMYF01009883_1_Hypsibius_dujardini_scaffold10962	Ribosomal_S4	8.7e-21
	Raw assembly by Boothby et al. (2015)	gi_957783607_gb_LMYF01004573_1_Hypsibius_dujardini_scaffold4884	Ribosomal_S9	3.3e-42
	Raw assembly by Boothby et al. (2015)	gi_957786473_gb_LMYF01001707_1_Hypsibius_dujardini_scaffold1884	tRNA-synt_1d	6.6e-103
	Raw assembly by Boothby et al. (2015)	gi_957782545_gb_LMYF01005635_1_Hypsibius_dujardini_scaffold5994	Toprim_N	1.7e-36
	Raw assembly by Boothby et al. (2015)	gi_957764936_gb_LMYF01019663_1_Hypsibius_dujardini_scaffold22903	DNA_pol3_beta_2	5.7e-30
	Raw assembly by Boothby et al. (2015)	gi_957784266_gb_LMYF01003914_1_Hypsibius_dujardini_scaffold4198	Cytidylate_kin	6.7e-53
	Raw assembly by Boothby et al. (2015)	gi_957783423_gb_LMYF01004757_1_Hypsibius_dujardini_scaffold5077	dsrm	3.6e-11
	Raw assembly by Boothby et al. (2015)	gi_957786822_gb_LMYF01001358_1_Hypsibius_dujardini_scaffold1521	RNA_pol_Rpb1_4	3.7e-18
	Raw assembly by Boothby et al. (2015)	gi_957774476_gb_LMYF01010123_1_Hypsibius_dujardini_scaffold11258	Ribosomal_L17	9.7e-38
	Raw assembly by Boothby et al. (2015)	gi_957788168_gb_LMYF01000012_1_Hypsibius_dujardini_scaffold14	Ribosomal_L5	5.2e-17
	Raw assembly by Boothby et al. (2015)	gi_957779587_gb_LMYF01008593_1_Hypsibius_dujardini_scaffold9361	Ribosomal_S2	1.4e-82
	Raw assembly by Boothby et al. (2015)	gi_957788179_gb_LMYF01000001_1_Hypsibius_dujardini_scaffold1	Peptidase_A8	4.2e-37
	Raw assembly by Boothby et al. (2015)	gi_957785614_gb_LMYF01002566_1_Hypsibius_dujardini_scaffold2775	Trigger_C	6.5e-11
	Raw assembly by Boothby et al. (2015)	gi_957779587_gb_LMYF01008593_1_Hypsibius_dujardini_scaffold9361	Ribosomal_L13	2.1e-53
	Raw assembly by Boothby et al. (2015)	gi_957783939_gb_LMYF01004241_1_Hypsibius_dujardini_scaffold4539	RNA_pol_Rpb2_6	1.1e-83
	Raw assembly by Boothby et al. (2015)	gi_957788174_gb_LMYF01000006_1_Hypsibius_dujardini_scaffold6	GAD	1.2e-17
	Raw assembly by Boothby et al. (2015)	gi_957768435_gb_LMYF01016164_1_Hypsibius_dujardini_scaffold18658	SecE	4.7e-21
	Raw assembly by Boothby et al. (2015)	gi_957774894_gb_LMYF01009705_1_Hypsibius_dujardini_scaffold10739	Ribosomal_S20p	1.1e-21
	Raw assembly by Boothby et al. (2015)	gi_957788168_gb_LMYF01000012_1_Hypsibius_dujardini_scaffold14	SecY	2.2e-103
	Raw assembly by Boothby et al. (2015)	gi_957788167_gb_LMYF01000013_1_Hypsibius_dujardini_scaffold15	IF3_C	8.6e-32
	Raw assembly by Boothby et al. (2015)	gi_957780974_gb_LMYF01007206_1_Hypsibius_dujardini_scaffold7706	DNA_pol3_beta_2	5.9e-13
	Raw assembly by Boothby et al. (2015)	gi_957780591_gb_LMYF01007589_1_Hypsibius_dujardini_scaffold8148	RNA_pol_Rpb1_2	8.9e-52
	Raw assembly by Boothby et al. (2015)	gi_957782794_gb_LMYF01005386_1_Hypsibius_dujardini_scaffold5734	Ribosomal_L32p	8.1e-19
	Raw assembly by Boothby et al. (2015)	gi_957780591_gb_LMYF01007589_1_Hypsibius_dujardini_scaffold8148	RNA_pol_Rpb1_1	4e-32
	Raw assembly by Boothby et al. (2015)	gi_957788121_gb_LMYF01000059_1_Hypsibius_dujardini_scaffold75	Arg_tRNA_synt_N	1.9e-20
	Raw assembly by Boothby et al. (2015)	gi_957784176_gb_LMYF01004004_1_Hypsibius_dujardini_scaffold4293	S-AdoMet_synt_M	3.2e-53
	Raw assembly by Boothby et al. (2015)	gi_957787796_gb_LMYF01000384_1_Hypsibius_dujardini_scaffold467	THF_DHG_CYH_C	2.3e-56
	Raw assembly by Boothby et al. (2015)	gi_957778995_gb_LMYF01009185_1_Hypsibius_dujardini_scaffold10085	Ribosomal_L2_C	5.7e-55
	Raw assembly by Boothby et al. (2015)	gi_957774890_gb_LMYF01009709_1_Hypsibius_dujardini_scaffold10744	dsrm	3.4e-13
	Raw assembly by Boothby et al. (2015)	gi_957780591_gb_LMYF01007589_1_Hypsibius_dujardini_scaffold8148	RNA_pol_Rpb1_1	1.7e-10
	Raw assembly by Boothby et al. (2015)	gi_957772524_gb_LMYF01012075_1_Hypsibius_dujardini_scaffold13618	dsrm	1.4e-10
	Raw assembly by Boothby et al. (2015)	gi_957783224_gb_LMYF01004956_1_Hypsibius_dujardini_scaffold5282	Ribosomal_L28	1.5e-14
	Raw assembly by Boothby et al. (2015)	gi_957779803_gb_LMYF01008377_1_Hypsibius_dujardini_scaffold9099	RNA_pol_Rpb2_1	1.3e-28
	Raw assembly by Boothby et al. (2015)	gi_957784285_gb_LMYF01003895_1_Hypsibius_dujardini_scaffold4179	Ribosomal_L4	2.4e-09
	Raw assembly by Boothby et al. (2015)	gi_957772219_gb_LMYF01012380_1_Hypsibius_dujardini_scaffold13998	dsrm	1.6e-09
	Raw assembly by Boothby et al. (2015)	gi_957764621_gb_LMYF01019978_1_Hypsibius_dujardini_scaffold23285	S-AdoMet_synt_C	1.4e-64
	Raw assembly by Boothby et al. (2015)	gi_957787225_gb_LMYF01000955_1_Hypsibius_dujardini_scaffold1099	Cytidylate_kin	7.5e-51
	Raw assembly by Boothby et al. (2015)	gi_957765095_gb_LMYF01019504_1_Hypsibius_dujardini_scaffold22713	RNA_pol_A_bac	2.8e-24
	Raw assembly by Boothby et al. (2015)	gi_957787796_gb_LMYF01000384_1_Hypsibius_dujardini_scaffold467	GAD	2.9e-19
	Raw assembly by Boothby et al. (2015)	gi_957778995_gb_LMYF01009185_1_Hypsibius_dujardini_scaffold10085	Ribosomal_L23	1.6e-19
	Raw assembly by Boothby et al. (2015)	gi_957774476_gb_LMYF01010123_1_Hypsibius_dujardini_scaffold11258	RNA_pol_A_bac	6.2e-26
	Raw assembly by Boothby et al. (2015)	gi_957786283_gb_LMYF01001897_1_Hypsibius_dujardini_scaffold2087	Enolase_N	2.2e-21
	Raw assembly by Boothby et al. (2015)	gi_957780177_gb_LMYF01008003_1_Hypsibius_dujardini_scaffold8644	GTP1_OBG	7.4e-47
	Raw assembly by Boothby et al. (2015)	gi_957771181_gb_LMYF01013418_1_Hypsibius_dujardini_scaffold15293	UPF0054	2.4e-32
	Raw assembly by Boothby et al. (2015)	gi_957774476_gb_LMYF01010123_1_Hypsibius_dujardini_scaffold11258	Ribosomal_S4	2e-27
	Raw assembly by Boothby et al. (2015)	gi_957774946_gb_LMYF01009653_1_Hypsibius_dujardini_scaffold10676	Ribosomal_S2	2.1e-82
	Raw assembly by Boothby et al. (2015)	gi_957780974_gb_LMYF01007206_1_Hypsibius_dujardini_scaffold7706	DNA_pol3_beta	5.2e-25
	Raw assembly by Boothby et al. (2015)	gi_957773793_gb_LMYF01010806_1_Hypsibius_dujardini_scaffold12083	Enolase_C	1.8e-129
	Raw assembly by Boothby et al. (2015)	gi_957774946_gb_LMYF01009653_1_Hypsibius_dujardini_scaffold10676	Ribosomal_L13	3.2e-53
	Raw assembly by Boothby et al. (2015)	gi_957774986_gb_LMYF01009613_1_Hypsibius_dujardini_scaffold10623	IPPT	1.9e-42
	Raw assembly by Boothby et al. (2015)	gi_957785222_gb_LMYF01002958_1_Hypsibius_dujardini_scaffold3191	dsrm	2.9e-12
	Raw assembly by Boothby et al. (2015)	gi_957779268_gb_LMYF01008912_1_Hypsibius_dujardini_scaffold9758	S-AdoMet_synt_M	1e-25
	Raw assembly by Boothby et al. (2015)	gi_957781060_gb_LMYF01007120_1_Hypsibius_dujardini_scaffold7608	RecR	1.1e-17
	Raw assembly by Boothby et al. (2015)	gi_957787120_gb_LMYF01001060_1_Hypsibius_dujardini_scaffold1209	CoaE	3.5e-20
	Raw assembly by Boothby et al. (2015)	gi_957763796_gb_LMYF01020803_1_Hypsibius_dujardini_scaffold24261	Enolase_N	3.4e-49
	Raw assembly by Boothby et al. (2015)	gi_957774716_gb_LMYF01009883_1_Hypsibius_dujardini_scaffold10962	RNA_pol_A_bac	8.3e-20
	Raw assembly by Boothby et al. (2015)	gi_957788170_gb_LMYF01000010_1_Hypsibius_dujardini_scaffold10	Seryl_tRNA_N	4.7e-26
	Raw assembly by Boothby et al. (2015)	gi_957788174_gb_LMYF01000006_1_Hypsibius_dujardini_scaffold6	EF_TS	7.4e-47
	Raw assembly by Boothby et al. (2015)	gi_957782470_gb_LMYF01005710_1_Hypsibius_dujardini_scaffold6076	RNA_pol_A_CTD	2e-23
	Raw assembly by Boothby et al. (2015)	gi_957788174_gb_LMYF01000006_1_Hypsibius_dujardini_scaffold6	FDX-ACB	3.2e-22
	Raw assembly by Boothby et al. (2015)	gi_957788163_gb_LMYF01000017_1_Hypsibius_dujardini_scaffold19	Ribosomal_S13	1e-37
	Raw assembly by Boothby et al. (2015)	gi_957766976_gb_LMYF01017623_1_Hypsibius_dujardini_scaffold20431	tRNA_m1G_MT	5.6e-50
	Raw assembly by Boothby et al. (2015)	gi_957788170_gb_LMYF01000010_1_Hypsibius_dujardini_scaffold10	Enolase_N	2.6e-63
	Raw assembly by Boothby et al. (2015)	gi_957787757_gb_LMYF01000423_1_Hypsibius_dujardini_scaffold513	Ribosomal_L22	1.3e-09
	Raw assembly by Boothby et al. (2015)	gi_957774213_gb_LMYF01010386_1_Hypsibius_dujardini_scaffold11579	DNA_pol3_beta_2	1.7e-45
	Raw assembly by Boothby et al. (2015)	gi_957788174_gb_LMYF01000006_1_Hypsibius_dujardini_scaffold6	GidB	7.1e-31
	Raw assembly by Boothby et al. (2015)	gi_957768696_gb_LMYF01015903_1_Hypsibius_dujardini_scaffold18324	Ribosomal_S8	4e-45
	Raw assembly by Boothby et al. (2015)	gi_957785327_gb_LMYF01002853_1_Hypsibius_dujardini_scaffold3078	tRNA-synt_1d	1.2e-31
	Raw assembly by Boothby et al. (2015)	gi_957788174_gb_LMYF01000006_1_Hypsibius_dujardini_scaffold6	tRNA-synt_2d	1.2e-87
	Raw assembly by Boothby et al. (2015)	gi_957788177_gb_LMYF01000003_1_Hypsibius_dujardini_scaffold3	RNA_pol_A_CTD	4.1e-22
	Raw assembly by Boothby et al. (2015)	gi_957768696_gb_LMYF01015903_1_Hypsibius_dujardini_scaffold18324	Ribosomal_L18p	7e-33
	Raw assembly by Boothby et al. (2015)	gi_957781803_gb_LMYF01006377_1_Hypsibius_dujardini_scaffold6785	Enolase_N	6.3e-18
	Raw assembly by Boothby et al. (2015)	gi_957788175_gb_LMYF01000005_1_Hypsibius_dujardini_scaffold5	Ribosomal_L3	3.1e-45
	Raw assembly by Boothby et al. (2015)	gi_957785847_gb_LMYF01002333_1_Hypsibius_dujardini_scaffold2538	RNA_pol_Rpb1_1	8.7e-10
	Raw assembly by Boothby et al. (2015)	gi_957774646_gb_LMYF01009953_1_Hypsibius_dujardini_scaffold11045	RBFA	6.5e-28
	Raw assembly by Boothby et al. (2015)	gi_957782891_gb_LMYF01005289_1_Hypsibius_dujardini_scaffold5630	RRF	1.1e-65
	Raw assembly by Boothby et al. (2015)	gi_957788170_gb_LMYF01000010_1_Hypsibius_dujardini_scaffold10	Ribonuclease_P	3.3e-19
	Raw assembly by Boothby et al. (2015)	gi_957764439_gb_LMYF01020160_1_Hypsibius_dujardini_scaffold23490	RNA_pol_Rpb1_5	4.1e-23
	Raw assembly by Boothby et al. (2015)	gi_957787225_gb_LMYF01000955_1_Hypsibius_dujardini_scaffold1099	Ribosomal_L11_N	1.9e-26
	Raw assembly by Boothby et al. (2015)	gi_957764439_gb_LMYF01020160_1_Hypsibius_dujardini_scaffold23490	Ribosomal_S7	8.4e-61
	Raw assembly by Boothby et al. (2015)	gi_957785847_gb_LMYF01002333_1_Hypsibius_dujardini_scaffold2538	RNA_pol_Rpb1_3	3.7e-15
	Raw assembly by Boothby et al. (2015)	gi_957778995_gb_LMYF01009185_1_Hypsibius_dujardini_scaffold10085	Ribosomal_S10	9.9e-42
	Raw assembly by Boothby et al. (2015)	gi_957765383_gb_LMYF01019216_1_Hypsibius_dujardini_scaffold22382	RNA_pol_Rpb2_6	8.3e-30
	Raw assembly by Boothby et al. (2015)	gi_957783576_gb_LMYF01004604_1_Hypsibius_dujardini_scaffold4917	PseudoU_synth_1	3e-14
	Raw assembly by Boothby et al. (2015)	gi_957763551_gb_LMYF01021048_1_Hypsibius_dujardini_scaffold24557	PGK	6.7e-27
	Raw assembly by Boothby et al. (2015)	gi_957765471_gb_LMYF01019128_1_Hypsibius_dujardini_scaffold22272	Ribosomal_L2_C	1.9e-46
	Raw assembly by Boothby et al. (2015)	gi_957779384_gb_LMYF01008796_1_Hypsibius_dujardini_scaffold9617	TIM	4e-92
	Raw assembly by Boothby et al. (2015)	gi_957764439_gb_LMYF01020160_1_Hypsibius_dujardini_scaffold23490	Ribosom_S12_S23	3.4e-56
	Raw assembly by Boothby et al. (2015)	gi_957785265_gb_LMYF01002915_1_Hypsibius_dujardini_scaffold3143	GTP1_OBG	3.4e-19
	Raw assembly by Boothby et al. (2015)	gi_957780686_gb_LMYF01007494_1_Hypsibius_dujardini_scaffold8037	RNA_pol_A_bac	4.4e-19
	Raw assembly by Boothby et al. (2015)	gi_957787352_gb_LMYF01000828_1_Hypsibius_dujardini_scaffold965	GTP1_OBG	9.3e-54
	Raw assembly by Boothby et al. (2015)	gi_957782248_gb_LMYF01005932_1_Hypsibius_dujardini_scaffold6306	Ribosomal_L13	2.5e-37
	Raw assembly by Boothby et al. (2015)	gi_957781568_gb_LMYF01006612_1_Hypsibius_dujardini_scaffold7041	Ribosomal_L5	9.4e-19
	Raw assembly by Boothby et al. (2015)	gi_957786023_gb_LMYF01002157_1_Hypsibius_dujardini_scaffold2356	Ribosomal_S9	6.5e-14
	Raw assembly by Boothby et al. (2015)	gi_957774213_gb_LMYF01010386_1_Hypsibius_dujardini_scaffold11579	Ribosomal_S20p	8.2e-29
	Raw assembly by Boothby et al. (2015)	gi_957787959_gb_LMYF01000221_1_Hypsibius_dujardini_scaffold277	Ribosomal_L11	4.4e-27
	Raw assembly by Boothby et al. (2015)	gi_957780686_gb_LMYF01007494_1_Hypsibius_dujardini_scaffold8037	SRP_SPB	1e-38
	Raw assembly by Boothby et al. (2015)	gi_957781568_gb_LMYF01006612_1_Hypsibius_dujardini_scaffold7041	Ribosomal_L2	8.3e-35
	Raw assembly by Boothby et al. (2015)	gi_957788160_gb_LMYF01000020_1_Hypsibius_dujardini_scaffold22	PNPase	1.7e-13
	Raw assembly by Boothby et al. (2015)	gi_957788172_gb_LMYF01000008_1_Hypsibius_dujardini_scaffold8	PseudoU_synth_1	2.6e-30
	Raw assembly by Boothby et al. (2015)	gi_957788160_gb_LMYF01000020_1_Hypsibius_dujardini_scaffold22	SecG	4e-16
	Raw assembly by Boothby et al. (2015)	gi_957779364_gb_LMYF01008816_1_Hypsibius_dujardini_scaffold9642	SRP_SPB	3.5e-38
	Raw assembly by Boothby et al. (2015)	gi_957785847_gb_LMYF01002333_1_Hypsibius_dujardini_scaffold2538	RNA_pol_Rpb1_5	5.6e-19
	Raw assembly by Boothby et al. (2015)	gi_957766640_gb_LMYF01017959_1_Hypsibius_dujardini_scaffold20841	Ribosomal_L29	1.3e-25
	Raw assembly by Boothby et al. (2015)	gi_957765383_gb_LMYF01019216_1_Hypsibius_dujardini_scaffold22382	RNA_pol_Rpb1_3	2.5e-32
	Raw assembly by Boothby et al. (2015)	gi_957781116_gb_LMYF01007064_1_Hypsibius_dujardini_scaffold7544	Ribosomal_L21p	9e-31
	Raw assembly by Boothby et al. (2015)	gi_957787508_gb_LMYF01000672_1_Hypsibius_dujardini_scaffold790	Ribosomal_L9_N	9.9e-17
	Raw assembly by Boothby et al. (2015)	gi_957766640_gb_LMYF01017959_1_Hypsibius_dujardini_scaffold20841	Ribosomal_L14	1.2e-56
	Raw assembly by Boothby et al. (2015)	gi_957765383_gb_LMYF01019216_1_Hypsibius_dujardini_scaffold22382	RNA_pol_Rpb1_4	1.6e-20
	Raw assembly by Boothby et al. (2015)	gi_957788174_gb_LMYF01000006_1_Hypsibius_dujardini_scaffold6	Arg_tRNA_synt_N	2.6e-23
	Raw assembly by Boothby et al. (2015)	gi_957772580_gb_LMYF01012019_1_Hypsibius_dujardini_scaffold13549	Ribosomal_L14	1.9e-09
	Raw assembly by Boothby et al. (2015)	gi_957783245_gb_LMYF01004935_1_Hypsibius_dujardini_scaffold5259	RNA_pol_Rpb1_1	1.4e-14
	Raw assembly by Boothby et al. (2015)	gi_957783939_gb_LMYF01004241_1_Hypsibius_dujardini_scaffold4539	RNA_pol_Rpb1_1	1.2e-89
	Raw assembly by Boothby et al. (2015)	gi_957774476_gb_LMYF01010123_1_Hypsibius_dujardini_scaffold11258	eIF-1a	1.8e-30
	Raw assembly by Boothby et al. (2015)	gi_957769393_gb_LMYF01015206_1_Hypsibius_dujardini_scaffold17481	Ribosomal_L22	3.9e-33
	Raw assembly by Boothby et al. (2015)	gi_957774584_gb_LMYF01010015_1_Hypsibius_dujardini_scaffold11118	SRP_SPB	4.2e-12
	Raw assembly by Boothby et al. (2015)	gi_957788178_gb_LMYF01000002_1_Hypsibius_dujardini_scaffold2	Ribosomal_S15	1.6e-29
	Raw assembly by Boothby et al. (2015)	gi_957769345_gb_LMYF01015254_1_Hypsibius_dujardini_scaffold17540	GidB	1.6e-51
	Raw assembly by Boothby et al. (2015)	gi_957784632_gb_LMYF01003548_1_Hypsibius_dujardini_scaffold3811	Ribosomal_L19	2.6e-41
	Raw assembly by Boothby et al. (2015)	gi_957781425_gb_LMYF01006755_1_Hypsibius_dujardini_scaffold7196	Ribosomal_L28	7.4e-32
	Raw assembly by Boothby et al. (2015)	gi_957788178_gb_LMYF01000002_1_Hypsibius_dujardini_scaffold2	Toprim_N	1.1e-34
	Raw assembly by Boothby et al. (2015)	gi_957769393_gb_LMYF01015206_1_Hypsibius_dujardini_scaffold17481	Ribosomal_S17	1.8e-32
	Raw assembly by Boothby et al. (2015)	gi_957787411_gb_LMYF01000769_1_Hypsibius_dujardini_scaffold898	PNPase	9.4e-22
	Raw assembly by Boothby et al. (2015)	gi_957772922_gb_LMYF01011677_1_Hypsibius_dujardini_scaffold13147	RecA	2.1e-152
	Raw assembly by Boothby et al. (2015)	gi_957788174_gb_LMYF01000006_1_Hypsibius_dujardini_scaffold6	Phe_tRNA-synt_N	1.5e-15
	Raw assembly by Boothby et al. (2015)	gi_957774061_gb_LMYF01010538_1_Hypsibius_dujardini_scaffold11769	tRNA-synt_1d	1.8e-74
	Raw assembly by Boothby et al. (2015)	gi_957763872_gb_LMYF01020727_1_Hypsibius_dujardini_scaffold24166	UvrB	5.6e-23
	Raw assembly by Boothby et al. (2015)	gi_957786501_gb_LMYF01001679_1_Hypsibius_dujardini_scaffold1855	Ribosomal_L18e	5.1e-22
	Raw assembly by Boothby et al. (2015)	gi_957779271_gb_LMYF01008909_1_Hypsibius_dujardini_scaffold9755	SmpB	1.1e-27
	Raw assembly by Boothby et al. (2015)	gi_957779399_gb_LMYF01008781_1_Hypsibius_dujardini_scaffold9598	UBA	1.6e-10
	Raw assembly by Boothby et al. (2015)	gi_957783939_gb_LMYF01004241_1_Hypsibius_dujardini_scaffold4539	RNA_pol_Rpb1_2	3.9e-53
	Raw assembly by Boothby et al. (2015)	gi_957787315_gb_LMYF01000865_1_Hypsibius_dujardini_scaffold1003	RNA_pol_Rpb2_2	8.1e-45
	Raw assembly by Boothby et al. (2015)	gi_957779692_gb_LMYF01008488_1_Hypsibius_dujardini_scaffold9239	PNPase	3e-25
	Raw assembly by Boothby et al. (2015)	gi_957772667_gb_LMYF01011932_1_Hypsibius_dujardini_scaffold13452	Methyltransf_5	7.2e-40
	Raw assembly by Boothby et al. (2015)	gi_957781116_gb_LMYF01007064_1_Hypsibius_dujardini_scaffold7544	Ribosomal_L27	8.7e-40
	Raw assembly by Boothby et al. (2015)	gi_957783765_gb_LMYF01004415_1_Hypsibius_dujardini_scaffold4718	RNA_pol_A_CTD	9.4e-24
	Raw assembly by Boothby et al. (2015)	gi_957788163_gb_LMYF01000017_1_Hypsibius_dujardini_scaffold19	MurB_C	2e-27
	Raw assembly by Boothby et al. (2015)	gi_957780669_gb_LMYF01007511_1_Hypsibius_dujardini_scaffold8058	PGK	5.1e-10
	Raw assembly by Boothby et al. (2015)	gi_957783765_gb_LMYF01004415_1_Hypsibius_dujardini_scaffold4718	Ribosomal_S13	2.5e-39
	Raw assembly by Boothby et al. (2015)	gi_957778937_gb_LMYF01009243_1_Hypsibius_dujardini_scaffold10154	IPPT	7.2e-82
	Raw assembly by Boothby et al. (2015)	gi_957768463_gb_LMYF01016136_1_Hypsibius_dujardini_scaffold18617	Oligomerisation	4.6e-25
	Raw assembly by Boothby et al. (2015)	gi_957788163_gb_LMYF01000017_1_Hypsibius_dujardini_scaffold19	Ribosomal_L17	8.4e-34
	Raw assembly by Boothby et al. (2015)	gi_957788165_gb_LMYF01000015_1_Hypsibius_dujardini_scaffold17	Ribosomal_L18p	8.5e-40
	Raw assembly by Boothby et al. (2015)	gi_957784523_gb_LMYF01003657_1_Hypsibius_dujardini_scaffold3928	THF_DHG_CYH_C	7.8e-16
	Raw assembly by Boothby et al. (2015)	gi_957766649_gb_LMYF01017950_1_Hypsibius_dujardini_scaffold20832	Ribosomal_L35p	2.7e-17
	Raw assembly by Boothby et al. (2015)	gi_957783485_gb_LMYF01004695_1_Hypsibius_dujardini_scaffold5013	RNA_pol_Rpb1_4	4.9e-16
	Raw assembly by Boothby et al. (2015)	gi_957775189_gb_LMYF01009410_1_Hypsibius_dujardini_scaffold10374	CoaE	6.6e-47
	Raw assembly by Boothby et al. (2015)	gi_957788162_gb_LMYF01000018_1_Hypsibius_dujardini_scaffold20	CTP_synth_N	1.3e-28
	Raw assembly by Boothby et al. (2015)	gi_957774326_gb_LMYF01010273_1_Hypsibius_dujardini_scaffold11444	Trigger_C	8.4e-27
	Raw assembly by Boothby et al. (2015)	gi_957772190_gb_LMYF01012409_1_Hypsibius_dujardini_scaffold14039	tRNA_m1G_MT	4.1e-48
	Raw assembly by Boothby et al. (2015)	gi_957771025_gb_LMYF01013574_1_Hypsibius_dujardini_scaffold15484	UPF0079	2.3e-33
	Raw assembly by Boothby et al. (2015)	gi_957788162_gb_LMYF01000018_1_Hypsibius_dujardini_scaffold20	CTP_synth_N	7.1e-15
	Raw assembly by Boothby et al. (2015)	gi_957788163_gb_LMYF01000017_1_Hypsibius_dujardini_scaffold19	S-AdoMet_synt_C	8.7e-63
	Raw assembly by Boothby et al. (2015)	gi_957768433_gb_LMYF01016166_1_Hypsibius_dujardini_scaffold18663	Enolase_C	1.8e-35
	Raw assembly by Boothby et al. (2015)	gi_957782230_gb_LMYF01005950_1_Hypsibius_dujardini_scaffold6324	RuvA_N	5.3e-22
	Raw assembly by Boothby et al. (2015)	gi_957783765_gb_LMYF01004415_1_Hypsibius_dujardini_scaffold4718	RNA_pol_L	3.4e-23
	Raw assembly by Boothby et al. (2015)	gi_957779021_gb_LMYF01009159_1_Hypsibius_dujardini_scaffold10050	Ribosomal_L21p	7.6e-40
	Raw assembly by Boothby et al. (2015)	gi_957764621_gb_LMYF01019978_1_Hypsibius_dujardini_scaffold23285	S-AdoMet_synt_M	5.9e-41
	Raw assembly by Boothby et al. (2015)	gi_957782184_gb_LMYF01005996_1_Hypsibius_dujardini_scaffold6376	dsrm	2.9e-12
	Raw assembly by Boothby et al. (2015)	gi_957787279_gb_LMYF01000901_1_Hypsibius_dujardini_scaffold1040	Ribosomal_S19	1.1e-09
	Raw assembly by Boothby et al. (2015)	gi_957781258_gb_LMYF01006922_1_Hypsibius_dujardini_scaffold7389	RNA_pol_Rpb2_6	1.5e-36
	Raw assembly by Boothby et al. (2015)	gi_957783100_gb_LMYF01005080_1_Hypsibius_dujardini_scaffold5414	tRNA-synt_1d	3.9e-23
	Raw assembly by Boothby et al. (2015)	gi_957769393_gb_LMYF01015206_1_Hypsibius_dujardini_scaffold17481	Ribosomal_S3_C	1.1e-28
	Raw assembly by Boothby et al. (2015)	gi_957788177_gb_LMYF01000003_1_Hypsibius_dujardini_scaffold3	Seryl_tRNA_N	5.5e-26
	Raw assembly by Boothby et al. (2015)	gi_957768975_gb_LMYF01015624_1_Hypsibius_dujardini_scaffold17979	UBA	9e-13
	Raw assembly by Boothby et al. (2015)	gi_957767114_gb_LMYF01017485_1_Hypsibius_dujardini_scaffold20266	RNA_pol_L	3.6e-27
	Raw assembly by Boothby et al. (2015)	gi_957788172_gb_LMYF01000008_1_Hypsibius_dujardini_scaffold8	tRNA-synt_1d	2.3e-51
[truncated: 2,086 more rows]

## Sheet: Table
	Single copy gene HMM profile (Campbell et al., 2013)	Raw assembly by Boothby et al. (2015)	Curated draft genome of Hypsibius dujardini from Boothby et al. assembly in this study	Raw assembly by Koutsovoulos et al. (2015)	Curated draft genome of Hypsibius dujardini from Koutsovoulos et al. (2015)
	Arg_tRNA_synt_N	10	0	11	0
	B5	10	1	8	0
	CoaE	15	3	8	1
	Competence	10	0	15	0
	Cons_hypoth95	7	0	8	0
	CTP_synth_N	10	3	19	2
	Cytidylate_kin	12	0	10	0
	DNA_pol3_beta	11	0	12	0
	DNA_pol3_beta_2	14	0	15	0
	DNA_pol3_beta_3	13	0	14	0
	dsrm	35	22	16	9
	EF_TS	13	2	16	2
	eIF-1a	9	2	17	1
	Enolase_C	21	6	21	3
	Enolase_N	20	7	11	2
	FAD_syn	11	0	11	0
	FDX-ACB	10	1	10	1
	Flavokinase	11	1	13	1
	GAD	12	4	13	1
	GidB	13	0	10	0
	GMP_synt_C	10	1	10	2
	GrpE	13	2	13	1
	GTP1_OBG	18	4	13	0
	IF-2	13	5	16	4
	IF2_N	6	0	15	0
	IF3_C	16	3	13	1
	IF3_N	12	0	13	0
	IPPT	10	0	14	0
	LepA_C	4	0	10	0
	Methyltransf_5	14	3	17	0
	MurB_C	14	0	10	0
	NusA_N	7	0	10	0
	Oligomerisation	16	3	15	1
	Pept_tRNA_hydro	10	0	11	0
	Peptidase_A8	19	0	16	0
	PGK	23	11	31	6
	Phe_tRNA-synt_N	9	0	8	0
	PNPase	15	0	9	0
	PseudoU_synth_1	17	5	12	1
	RBFA	12	0	11	0
	RecA	17	0	20	0
	RecR	15	0	9	0
	Ribonuclease_P	8	0	8	0
	Ribosom_S12_S23	11	2	13	1
	Ribosomal_L1	16	2	21	3
	Ribosomal_L10	11	2	10	1
	Ribosomal_L11	12	2	12	0
	Ribosomal_L11_N	10	0	9	0
	Ribosomal_L12	7	0	11	0
	Ribosomal_L13	16	0	14	0
	Ribosomal_L14	17	4	12	2
	Ribosomal_L16	17	4	15	1
	Ribosomal_L17	12	0	14	0
	Ribosomal_L18e	15	5	11	2
	Ribosomal_L18p	9	0	11	0
	Ribosomal_L19	12	0	15	0
	Ribosomal_L2	15	1	12	0
	Ribosomal_L2_C	14	0	13	2
	Ribosomal_L20	11	0	11	0
	Ribosomal_L21p	12	0	10	0
	Ribosomal_L22	14	2	14	0
	Ribosomal_L23	17	4	13	1
	Ribosomal_L27	14	0	12	0
	Ribosomal_L28	10	0	12	0
	Ribosomal_L29	13	2	14	1
	Ribosomal_L3	13	3	16	2
	Ribosomal_L32p	12	0	7	0
	Ribosomal_L35p	9	0	11	0
	Ribosomal_L4	16	3	19	0
	Ribosomal_L5	10	1	17	0
	Ribosomal_L5_C	12	2	18	0
	Ribosomal_L6	9	0	17	1
	Ribosomal_L9_C	6	0	8	0
	Ribosomal_L9_N	6	0	8	0
	Ribosomal_S10	10	0	10	1
	Ribosomal_S11	14	3	12	1
	Ribosomal_S13	11	1	13	0
	Ribosomal_S15	15	2	12	0
	Ribosomal_S16	9	1	9	0
	Ribosomal_S17	12	0	14	0
	Ribosomal_S18	6	0	12	1
	Ribosomal_S19	14	0	15	0
	Ribosomal_S2	12	1	16	1
	Ribosomal_S20p	8	0	12	0
	Ribosomal_S3_C	14	0	12	0
	Ribosomal_S4	13	1	13	1
	Ribosomal_S5	8	0	11	0
	Ribosomal_S5_C	11	2	10	1
	Ribosomal_S6	6	0	11	0
	Ribosomal_S7	8	0	15	0
	Ribosomal_S8	8	0	15	0
	Ribosomal_S9	15	1	12	2
	RimM	7	0	12	0
	RNA_pol_A_bac	20	8	17	4
	RNA_pol_A_CTD	15	0	10	0
	RNA_pol_L	12	0	14	0
	RNA_pol_Rpb1_1	23	11	20	3
	RNA_pol_Rpb1_2	21	9	16	3
	RNA_pol_Rpb1_3	17	7	17	2
	RNA_pol_Rpb1_4	13	4	15	1
	RNA_pol_Rpb1_5	25	11	35	5
	RNA_pol_Rpb2_1	17	11	18	5
	RNA_pol_Rpb2_2	16	10	18	2
	RNA_pol_Rpb2_3	19	11	16	3
	RNA_pol_Rpb2_45	7	0	14	0
	RNA_pol_Rpb2_6	40	30	39	8
	RNA_pol_Rpb2_7	18	9	17	1
	RRF	12	0	17	1
	RuvA_C	10	0	8	0
	RuvA_N	11	0	8	0
	RuvB_C	4	0	7	0
	S-AdoMet_synt_C	16	1	13	0
	S-AdoMet_synt_M	18	3	18	0
	SecE	13	2	8	2
	SecG	13	0	10	0
	SecY	15	3	24	2
	Seryl_tRNA_N	11	1	9	0
	SmpB	12	0	10	1
	SRP_SPB	10	1	15	3
	THF_DHG_CYH	21	2	11	1
	THF_DHG_CYH_C	27	9	13	2
	TIM	10	0	19	0
	Toprim_N	11	0	11	0
	TRCF	9	0	7	0
	Trigger_C	13	0	10	0
	Trigger_N	13	0	13	0
	tRNA_m1G_MT	16	4	15	2
	tRNA-synt_1d	16	4	11	1
	tRNA-synt_2d	15	4	18	1
	TruB_N	13	1	11	0
	UBA	16	5	9	3
	UPF0054	9	0	16	0
	UPF0079	9	0	10	1
	UPF0081	10	0	11	1
	UvrB	11	0	11	0
	UvrC_HhH_N	10	0	17	0
	Val_tRNA-synt_C	7	0	7	0
	YchF-GTPase_C	11	0	10	0
	zf-C4_ClpX	14	0	7	0
